# Supplementary material
Source: PubMed Central journal article supplement (PMC6258261)

## Supporting Information

Computation-guided rational design of a peptide motif that reacts with  
cyanobenzothiazoles via internal cysteine-lysine relay

Samantha G. L. Keyser,<sup>†,‡</sup> Ashley Utz,<sup>‡</sup> Carolyn R. Bertozzi<sup>\*,‡,§</sup>

<sup>†</sup>Department of Chemistry, University of California, Berkeley, California 94720, United States

<sup>‡</sup>Department of Chemistry and <sup>§</sup>Howard Hughes Medical Institute, Stanford University, Stanford,  
California 94305, United States

*bertozzi@stanford.edu*

### Contents

|         |                                                                                                                                   |
|---------|-----------------------------------------------------------------------------------------------------------------------------------|
| S3-S5   | <b>Table S1.</b> List of sequences modeled using PEP-FOLD                                                                         |
| S6-S10  | <b>Figure S1.</b> 13CBTNAc binding assay and cysteine competition MALDI-TOF-MS data for the eighteen peptides synthesized by SPPS |
| S11     | <b>Figure S2.</b> Binding and cysteine competition assays for CBTag 1.0 in the presence of 5 mM glutathione (reduced)             |
| S12     | <b>Figure S3.</b> Binding and cysteine competition assays for CBTag 1.0 (K9R) and CBTag 1.0 (C7S)                                 |
| S13-S14 | <b>Figure S4.</b> Results of chloroacetate labeling of thiols under various conditions                                            |
| S15-S17 | <b>Figure S5.</b> <sup>13</sup> C NMR shows that the final CBTag 1.0-13CBTNAc adduct is not the tetrahedral intermediate          |
| S18     | <b>Figure S6.</b> LC-MS chromatographs for 1:4 CBTag 1.0/13CBTNAc and extracted mass ions                                         |
| S19-S20 | <b>Figure S7.</b> Cysteine treatment identifies peaks that contain cysteine adducts S21-                                          |
| S22     | <b>Figure S8.</b> LC-MS-based time-course graphs for the reaction between CBTag 1.0 and 13CBTNAc                                  |

|           |                                                                                                                                                                           |
|-----------|---------------------------------------------------------------------------------------------------------------------------------------------------------------------------|
| S23       | <b>Figure S9.</b> Extraction of relevant mass ions from the LC-MS spectrum of the reaction between CBTag 1.0 (K9R) and <sup>13</sup> CBTNAc                               |
| S24       | <b>Figure S10.</b> Cysteine treatment causes the peak for the modified CBTag 1.0 (K9R) to disappear                                                                       |
| S25       | <b>Figure S11.</b> The LC-MS spectrum and the corresponding extracted mass ions at the final time point show that CBTag 1.0 (C7S) is not modified by <sup>13</sup> CBTNAc |
| S26-S28   | <b>Table S2.</b> Calculations for 1:1 CBTag 1.0/ <sup>13</sup> CBTNAc LC-MS time-course assay                                                                             |
| S29-S30   | <b>Table S3.</b> Calculations for 1:4 CBTag 1.0/ <sup>13</sup> CBTNAc LC-MS time-course assay                                                                             |
| S31-S32   | <b>Table S4.</b> Calculations for 4:1 CBTag 1.0/ <sup>13</sup> CBTNAc LC-MS time-course assay                                                                             |
| S33       | <b>Figure S12.</b> <sup>13</sup> CBTNAc binding assay and cysteine treatment results for a 1:1 mixture of CBTag 1.0 (K9R) and CBTag 1.0 (C7S)                             |
| S34       | <b>Figure S13.</b> Lowest energy conformation of potential final products (Maestro)                                                                                       |
| S35-S61   | LC-MS time-course assay spectra and integration results (peak legend on S34)                                                                                              |
| S62-S111  | LC-MS spectra (compound purity; list on S61)                                                                                                                              |
| S112-S142 | NMR spectra                                                                                                                                                               |

**Table S1.** List of sequences modeled using PEP-FOLD.<sup>25-26</sup> Bolded peptides in blue-shaded cells were subsequently made by SPPS.

|                              |                          |
|------------------------------|--------------------------|
| AAAAAWGHGDGCKWGWGSGHGWA AAAA | AAAAAWGDGCKWGWGSGHGAAAAA |
| AAAAAHDGCKGDHAAAAA           | PWGDGCKWGWGSGHGWP        |
| PGHDCKDHGP                   | GGGGGGHCDKHGGGGGGGG      |
| GGGGGGHCDDKHGGGGGGGG         | GGGGGGHCGDKHGGGGGGGG     |
| GGGGGGHCDGKHGGGGGGGG         | GGGGGGHSDGKCGGGGGGGG     |
| GGGGGGHGDGKCGGGGGGGG         | GGGGHSDGKCGGGGGGG        |
| GGGGHGDGKCGGGGGGG            | GGGGGGGHDGKCGGGGGGGG     |
| GGGGGHDGKCGGGGGGG            | GGGGGGGDHGKCGGGGGGGG     |
| GGHGDGKCGG                   | GGGGGGHGHGKCGGGGGGGG     |
| GGGGGGGGHGHGKCGGGGGGGG       | GGHCDGKGGG               |
| GGHGDGCKGG                   | GGDGHGCKGG               |
| GGDGHGCGKGG                  | GGKGDGHGCGG              |
| GGKGDHCGGG                   | GGKGDHCGGG               |
| GGDGHPCGKGG                  | GGDGHPCPKGG              |
| GGDPHPCPKGG                  | GGKGHPCDGG               |
| GGDPHPCKGGG                  | GGDGHPCKGGG              |
| <b>GGDPHPCKGGG</b>           | <b>GGHPDPCKGGG</b>       |
| DGDHPHPCKGGS                 | GGGGGGHCHGKGGGGGGGG      |
| GGDPHPGCKGG                  | GGDPHPGCKGG              |
| GGDPCPHGKGG                  | <b>GGDPCPHPKGG</b>       |
| GGHPCPDGKGG                  | GGHPCDPKGG               |
| GGHPKPDPCGG                  | <b>GGHPDPCKGG</b>        |
| GGHPDPCPKGG                  | GGEPCHPKGG               |
| <b>GGHPEPCPKGG</b>           | <b>GGHPEPCPKGG</b>       |
| <b>GGEPHPCPKGG</b>           | GGEPHKCGGG               |
| GGGEHKCGGGG                  | GGGEHCKGGGG              |
| GGGFCPFGGG                   | AAAAAAAFCPFAAAAAAA       |
| AAAAAAAFPCFAAAAAAAA          | AAHPDPCPKAA              |
| AAHPDPCPKPFAA                | AAAAAAAHDPDPCPKAAAAAAA   |
| AAAAAAAHDPDPCPKPFAAAAAAAA    | GGHPDPCPKPFGG            |
| GGHPDPCPKPFGG                | GGHPGDPKFGG              |
| GGHPDPCPFKGG                 | GGHPDPCPFKGG             |
| GGHPDPCPYKGG                 | GGHPDPCPWKGG             |
| GGGGHPDPCPWKGGGG             | GGGGHPDPKCPWGGGG         |
| GGGGHPCPKDWGGGG              | GGGGHPCPKDWGGGG          |
| GGGGHPCDPKWGGGG              | GGGGHWCPDKGGGG           |
| GGGGHCPDKPWGGGG              | GGGGWPCPKHGGGG           |
| GGGGGGGGHPDPCWKGGGGGGGG      | GGGGGGGGHPWPDPCKGGGGGGGG |
| GGGGGGGGHPDPWPCPKGGGGGGGG    | GGGGGGGGHPDPCPWKGGGGGGGG |
| AAAAAAAHPPDPCPKAAAAAAA       | GGGGGGGGDHPKPCPWGGGGGGGG |
| GGGGGGGGHPDPCPWKGGGGGGGG     | GGHPPDPCPKGG             |
| GGHPKPHPCGG                  | GGCPHPKPHGG              |
| <b>GGCPKPHPHGG</b>           | GGHPCPKPHGG              |
| GGCPKPHHGG                   | GGCPKHHGG                |

|                                      |                      |
|--------------------------------------|----------------------|
| GGHPKPCPHGG                          | GGCPKPSPHGG          |
| GGGGCPKPHGGGG                        | GGHPCPHPKGG          |
| GGHPCGHPKGG                          | GGHGCPHPKGG          |
| GGHGCGHPKGG                          | GGHCGHPKGG           |
| GGHGCHPKGG                           | GGHPKPHGCGG          |
| GGHPKPWPCGG                          | GGCPKPVPHPHGG        |
| GGCPKPWPHGG                          | GGHPWPKPCGG          |
| GGHPWPKPCGG                          | GGCPKPHPWGG          |
| PPPPPPPPPP                           | GGAPKPHCWGG          |
| PPPPPPPPPPPPPPPPPPPPPPPPPPPPPPPPPPPP | AAAAAAAAAAPAAAAAAAAA |
| GGKCPHPPPHGG                         | GGGCPHKPPHGG         |
| GGKPCPHPPHGG                         | AAAAAPPAAAAA         |
| GGCPHPHPKGG                          | GGCPHPWPKGG          |
| GGCPKPEPHGG                          | <b>GGCPKDPHGG</b>    |
| GGCPKHPPEGG                          | GGCPKHPDGG           |
| GGCPHPKPDGG                          | GGHPDKPCGG           |
| GGHPCPKPDGG                          | GGHPKPCPDGG          |
| GGDPCPKPHGG                          | GGDPHPKPCGG          |
| GGDPKHPHPCGG                         | GGDPKPCPHGG          |
| GGCPHPDPKGG                          | <b>GGCPDHPKGG</b>    |
| GGCPDPKPHGG                          | GGKPDHPHPCGG         |
| GGKPDPCPHGG                          | GGKPHPDPCGG          |
| GGKHPGPDGG                           | <b>GGKPCHPDGG</b>    |
| GGKPCDPHGG                           | GGHPCPKPHPHGG        |
| GGHPHPCPKPHPHGG                      | GGHPHPCPKPHGG        |
| GGCPWPKPHGG                          | GGWPCPKPHGG          |
| GGGGHPCPKPHPHGGGG                    | GGGGHPCPKPHPHGGGG    |
| GGHPHPCPKGG                          | GGKPCPHPHGG          |
| GGKPCWPHGG                           | GGHPWPCPKGG          |
| <b>GGWPHPCPKGG</b>                   | GGHPHPKPCGG          |
| GGHPWPKPCGG                          | GGWPHPKPCGG          |
| GGHPTPCPKGG                          | GGCPKTPHGG           |
| GGHPHPKPCPDGG                        | GGCPTPKPHGG          |
| <b>GGHPHPKPCPEGG</b>                 | GGHPWPKPCPDGG        |
| <b>GGHPWPKPCPEGG</b>                 | GGCPKYPHGG           |
| GGHPYPCPKGG                          | GGCPKHPYGG           |
| GGKPCHPYGG                           | GGCPKPRPHGG          |
| GGCPRPKPHGG                          | GGCPKPKPHGG          |
| GGCPKHPKGG                           | GGCPHPKPKGG          |
| GGKPCHPKGG                           | GGKPKHPHPCGG         |
| GGKPKPCPHGG                          | GGHPHPKPCPRGG        |
| GGHPKPHPCPRGG                        | GGHPWPKPCPRGG        |
| GGCPKHPRGG                           | GGRWPWPKPCPHGG       |
| GGRWPWPKPHPCGG                       | GGRWPWPKPHCGG        |
| GGRWPWPKPHCGGG                       | GGRWPWPKPHKGGG       |
| GGWPCPHPKGG                          | GGWPHPCPKGGG         |
| GGWPHGCPKGG                          | <b>GGWPHGCPKGG</b>   |

|                |                     |
|----------------|---------------------|
| GGWPHPGKPCGG   | GGHPWPGCPKGG        |
| GGKPCGPWPHGG   | <b>GGKPCPGWPHGG</b> |
| GGCPKPGWPHGG   | GGFMGFPHPKPHPCGSGG  |
| GGFFPKPHPCGG   | GGFFPGKPHPCGG       |
| GGFFPGPKPHPCGG | GGFFPCPKPHPCGG      |
| GGFFPCPKPCPHGG | GGHPCPKPGPFPGG      |
| GGHPCPGKPFPGG  | GGCPHPGPKPFPGG      |
| GGCPKPFPPDPHGG | GGCPHPFPFKGG        |
| GGHPCPFPPKGG   | GGSPCFPPFKGG        |
| GGHCPFPFKGG    | GGHPFPFCPKGG        |
| GGHPFPFKPCGG   | GGHPKPFPPCGG        |
| GGHPKPCPFGG    | GGCPHPFKGG          |
| GGCFPHPKGG     | GGHPCPKPFGG         |
| GGFPCPKPHGG    | GGFPCPKPHFG         |
| GGFPCPKPHFGG   | GGHPKPGCPFGG        |
| GGHPKGPCPFGG   | <b>GGHPKPGCGFGG</b> |
| GGHPKPGCFGG    | <b>GGHPKPCGFGG</b>  |
| GGHPCPKGFGG    | GGHPKPWGFGG         |

**A. CBT<sub>1</sub>Tag 1.0, Ac-GGHPDPCPKGG-NH<sub>2</sub> (4): 1061.47 g/mol**

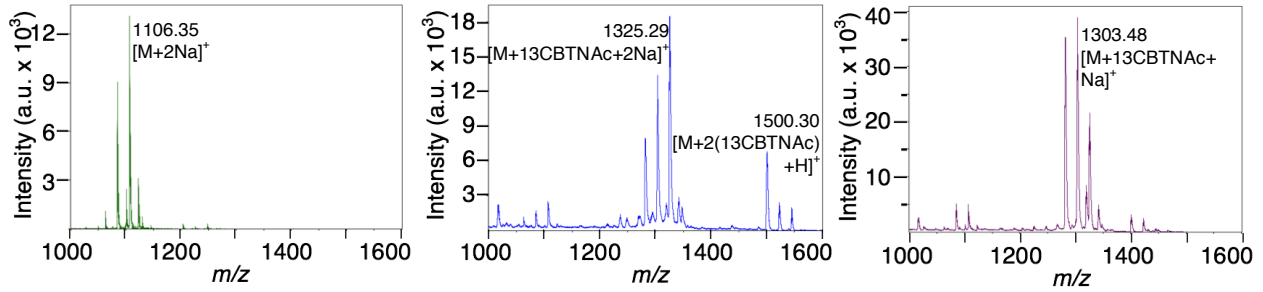

**B. PEP-FOLD-4, Ac-GGDPHPCKGG-NH<sub>2</sub> (5): 964.42 g/mol**

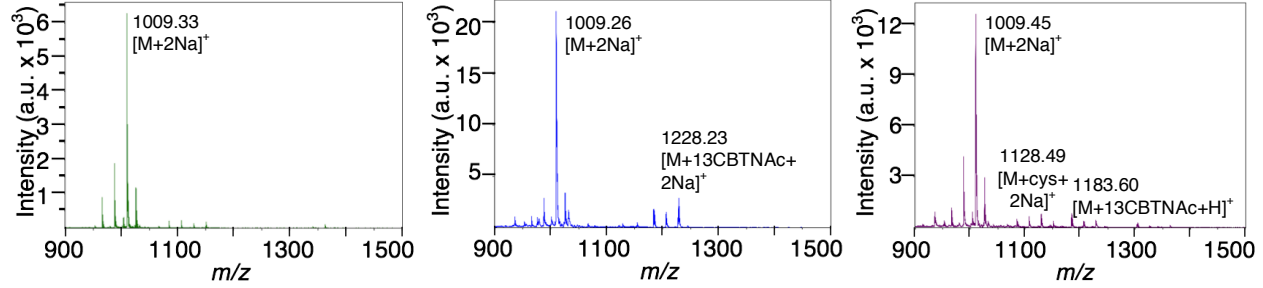

**C. PEP-FOLD-1, Ac-GGDPCPHPKGG-NH<sub>2</sub> (6): 1061.47 g/mol**

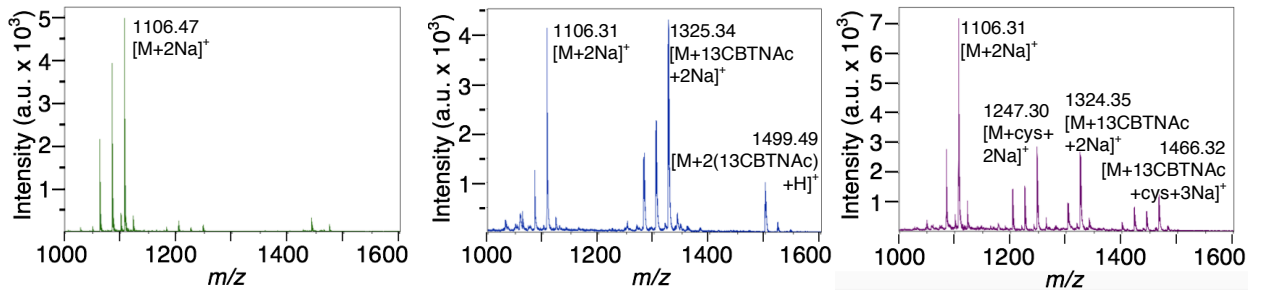

**D. PEP-FOLD-2, Ac-GGHPDCPKGG-NH<sub>2</sub> (7): 964.42 g/mol**

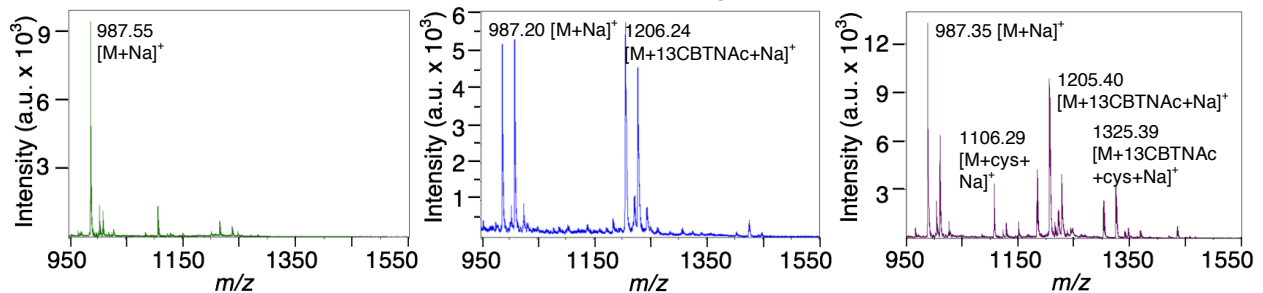

**E. PEP-FOLD-5, Ac-GGHPEPCPKGG-NH<sub>2</sub> (8): 1075.49 g/mol**

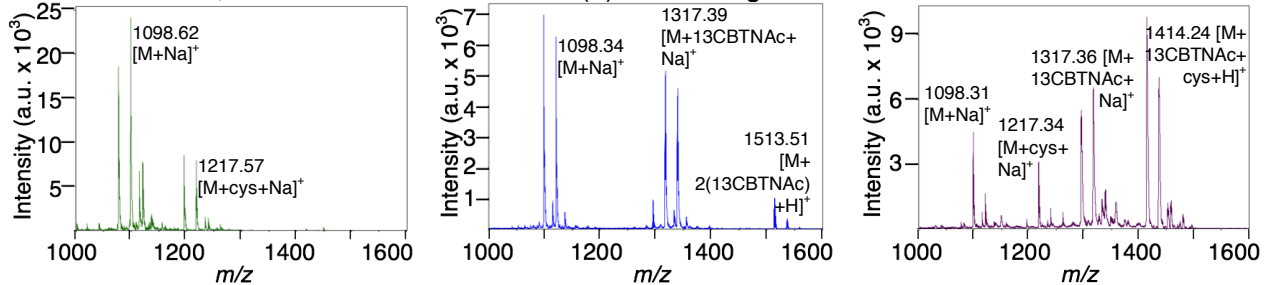

**F. PEP-FOLD-6, Ac-GGHPCEPKGG-NH<sub>2</sub> (9): 978.43 g/mol**

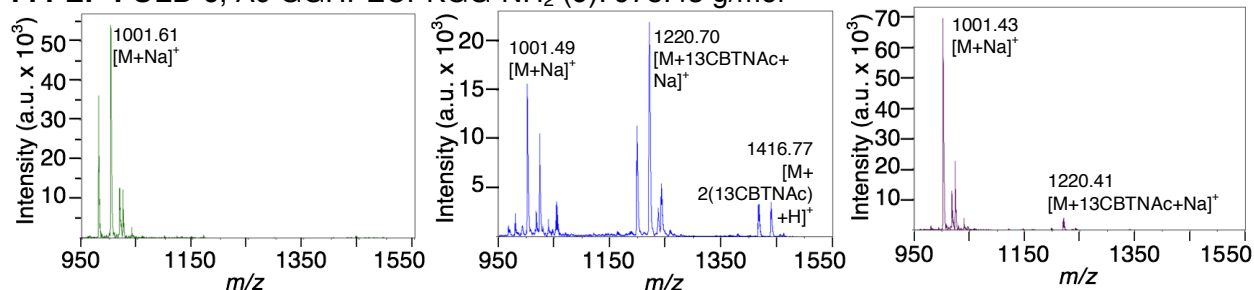

**G. PEP-FOLD-7, Ac-GGEPHPCPKGG-NH<sub>2</sub> (10): 1075.49 g/mol**

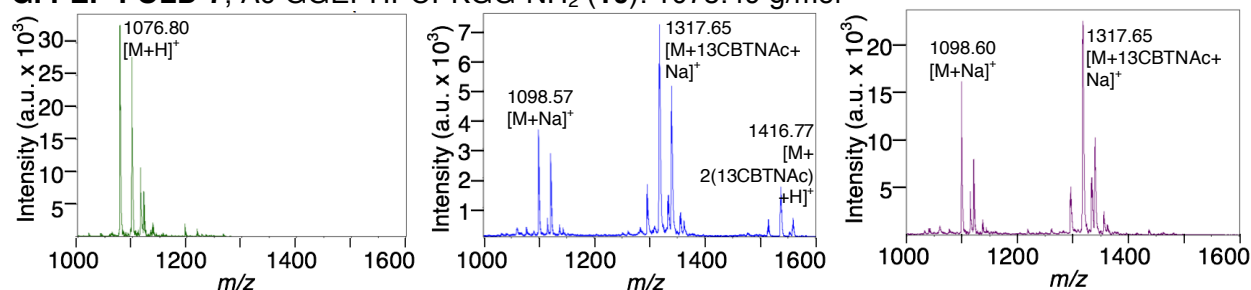

**H. PEP-FOLD-8, Ac-GGCPKPHPHGG-NH<sub>2</sub> (11): 1083.50 g/mol**

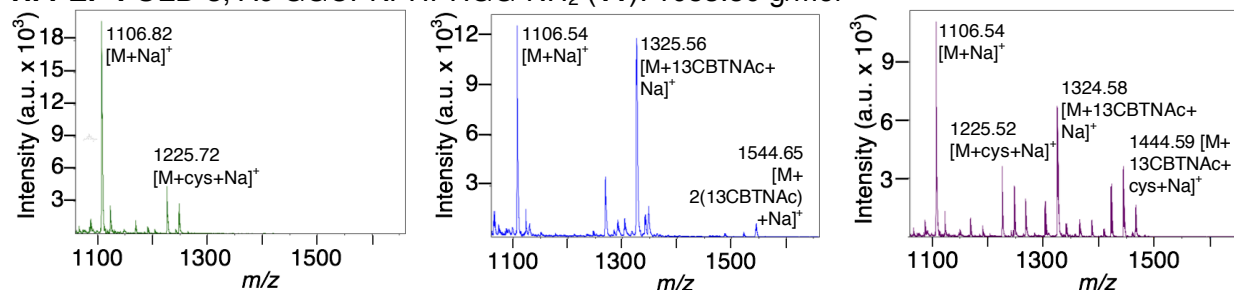

**I. PEP-FOLD-9, Ac-GGCPKPDPHGG-NH<sub>2</sub> (12): 1061.47 g/mol (-Gly: 1004.45 g/mol)**

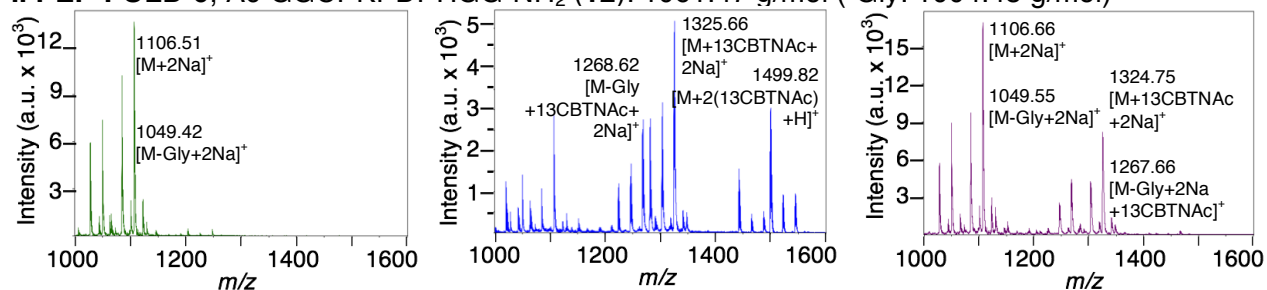

**J. PEP-FOLD-11, Ac-GGCPDHPKGG-NH<sub>2</sub> (13): 1061.47 g/mol (-2Gly: 947.43; -3Gly: 890.41)**

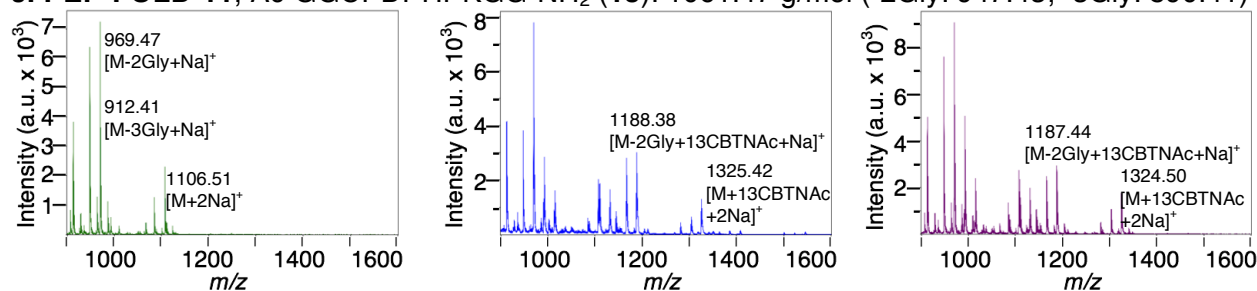

**K. PEP-FOLD-12, Ac-GGKPCPHPDGG-NH<sub>2</sub> (14): 1061.47 g/mol**

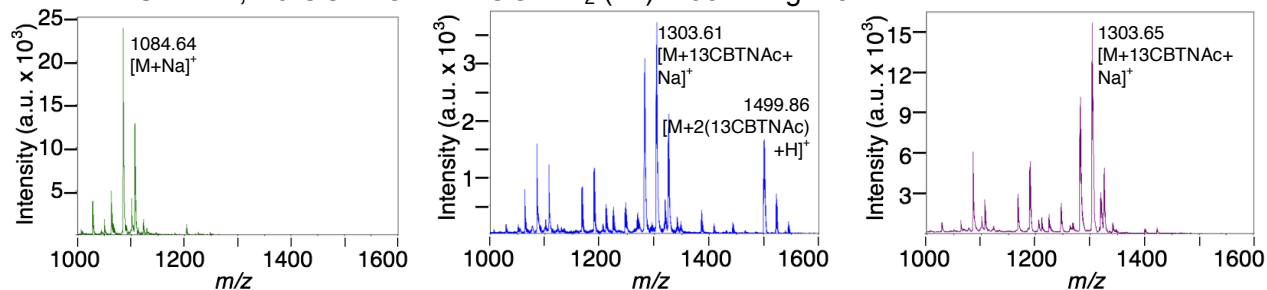

**L. PEP-FOLD-13, Ac-GGWPHPCPKGG-NH<sub>2</sub> (15): 1132.52 g/mol**

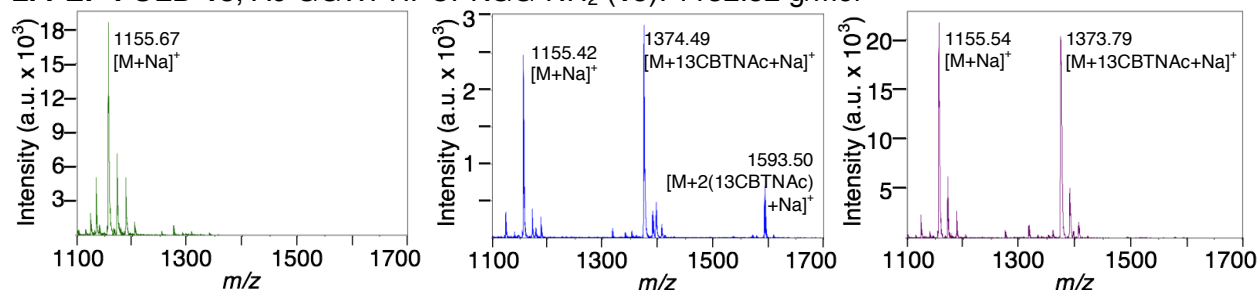

**M. PEP-FOLD-14, Ac-GGWPHPGCPKGG-NH<sub>2</sub> (16): 1189.55 g/mol**

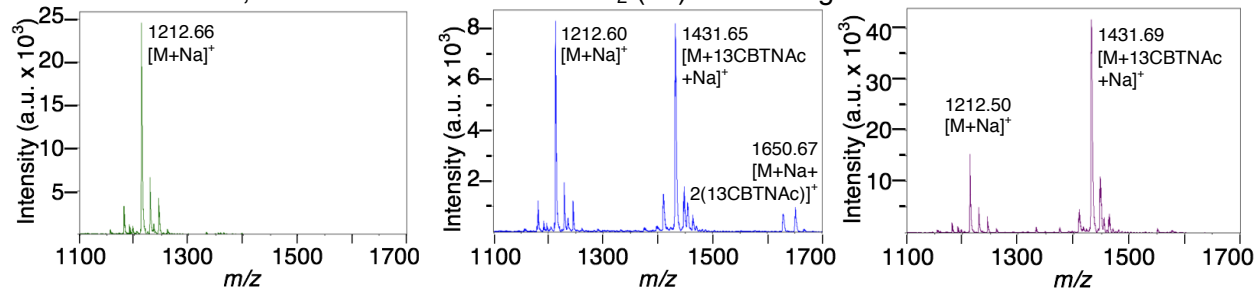

**N. PEP-FOLD-15, Ac-GGKPCPGWPHGG-NH<sub>2</sub> (17): 1189.55 g/mol**

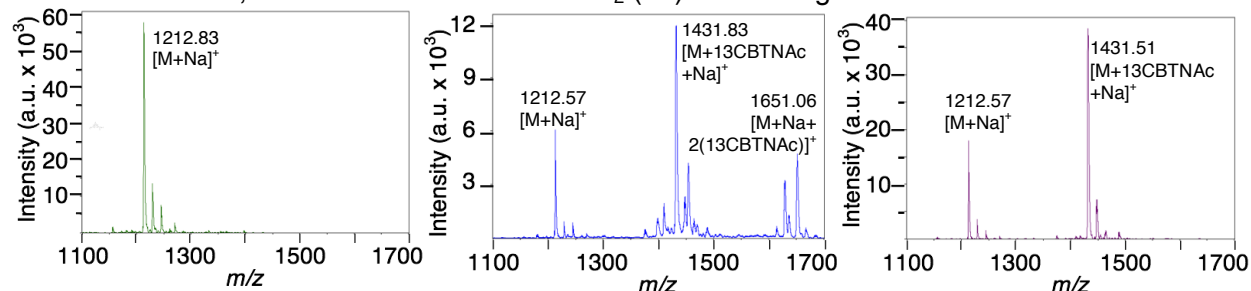

**O. PEP-FOLD-16, Ac-GGHPHPKPCPEGG-NH<sub>2</sub> (18): 1309.60 g/mol**

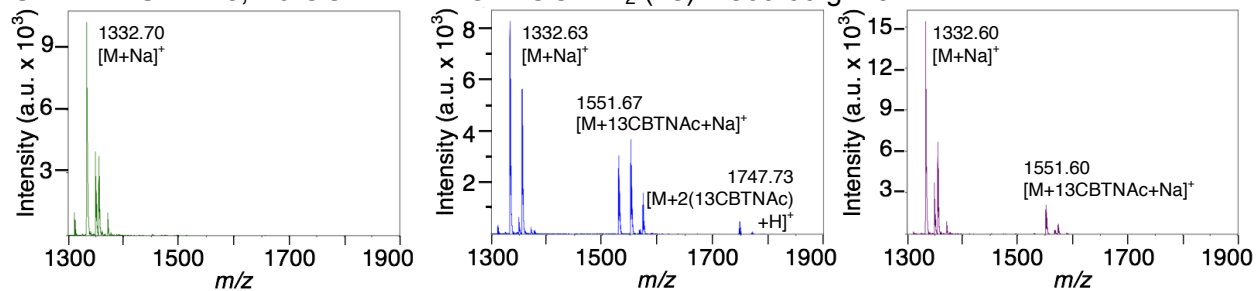



**P. PEP-FOLD-17, Ac-GGHPWPKPCPEGG-NH<sub>2</sub> (19): 1358.62 g/mol**

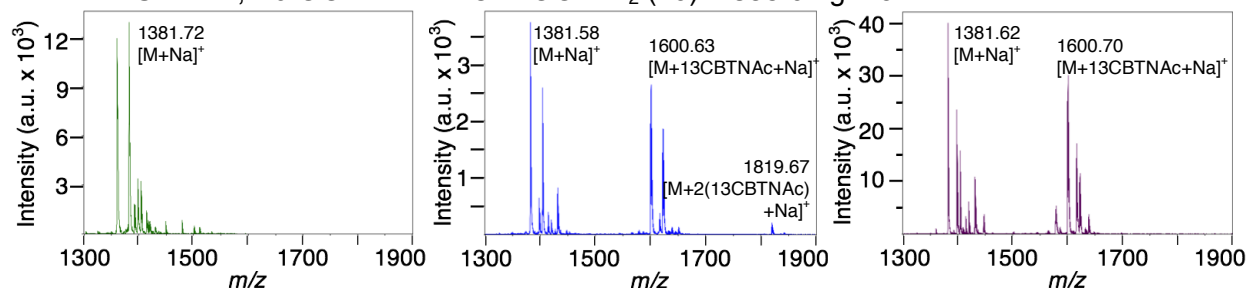

**Q. PEP-FOLD-18, Ac-GGHPKPGCGFGG-NH<sub>2</sub> (20): 1110.50 g/mol**

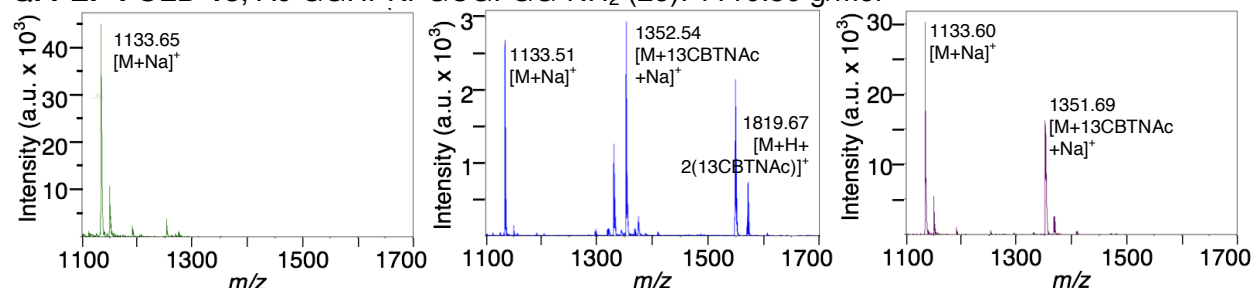

**R. PEP-FOLD-19, Ac-GGHPKPGCGFGG-NH<sub>2</sub> (21): 1053.48 g/mol (-Gly: 996.46 g/mol)**

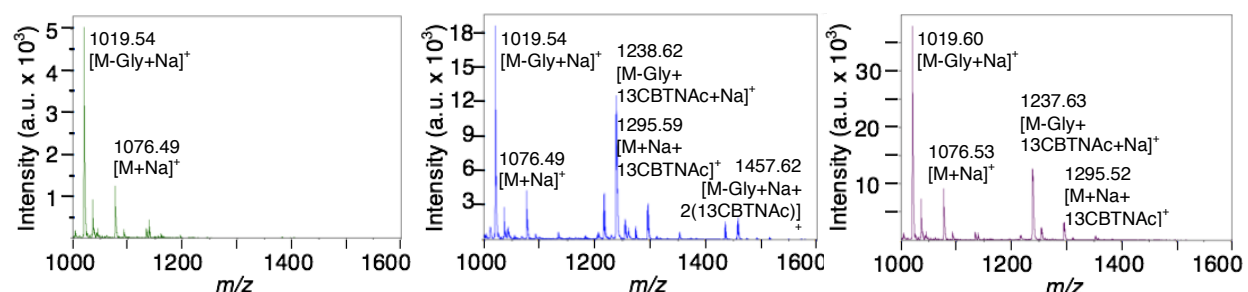

**Figure S1.** 13CBTNAc binding assay and cysteine competition MALDI-TOF-MS data for the eighteen peptides synthesized by SPPS. All peptides were re-purified by preparative RP-HPLC immediately prior to this experiment and all data in this figure were obtained in parallel in order to minimize sources of error. The binding assay and cysteine competition were as follows: 40  $\mu$ L of a 10% DMF in PBS solution of peptide (0.9 mM) with or without 13CBTNAc (1 mM) was incubated 48 h at r.t. Then, the negative control (without 13CBTNAc) and half (20  $\mu$ L) of the sample incubated with 13CBTNAc were each treated with an equal volume (20  $\mu$ L) of a solution of cysteine and DTT (10 and 15 mM, respectively) in PBS. The other half of the sample incubated with 13CBTNAc was treated with an equal volume of a solution of DTT (15 mM) in PBS. After 48 h at r.t., MALDI-TOF MS was used to analyze the negative control (left column, green spectra),

the sample incubated with  $^{13}\text{C}$ BTNAc then DTT alone (middle column, blue spectra), and the sample incubated with  $^{13}\text{C}$ BTNAc then cysteine and DTT (right column, purple spectra). Labels are in the format **Name of peptide**, Sequence (**Compound #**): Calculated exact mass (identity of major impurity and calculated exact mass, where applicable). **A**) CBTag 1.0 (**4**), analogous to Figure 3B. **B**) PEP-FOLD-4, analogous to Figure 3C (**5**). **C-R**) Other peptides tested. Peptides in **I**, **J**, and **R** have additional peaks corresponding to glycine deletions, but the residues that confer reactivity (e.g., Cys, Lys) were not affected.

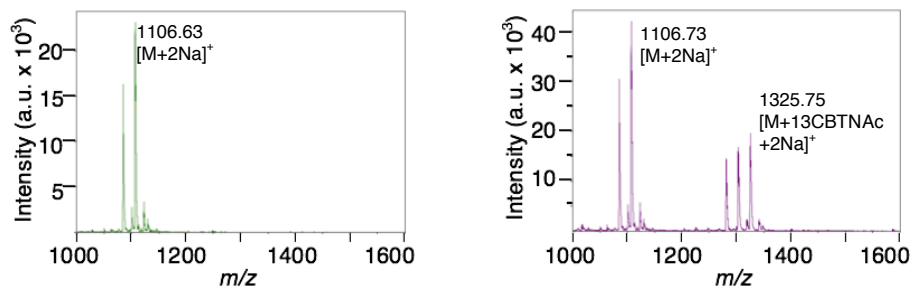

**Figure S2.** Results of the <sup>13</sup>CBTNAC binding assay and cysteine treatment for CBTag 1.0 when conducted in the presence of 5 mM glutathione (reduced). Left (green spectrum), negative control after treatment with cysteine and DTT. Right (purple spectrum), CBTag 1.0 treated with 1.1 equiv. of <sup>13</sup>CBTNAC then with 10 equiv. cysteine and 15 equiv. DTT relative to <sup>13</sup>CBTNAC. CBTag 1.0-<sup>13</sup>CBTNAC adduct is observed, though less has formed than in the absence of glutathione.

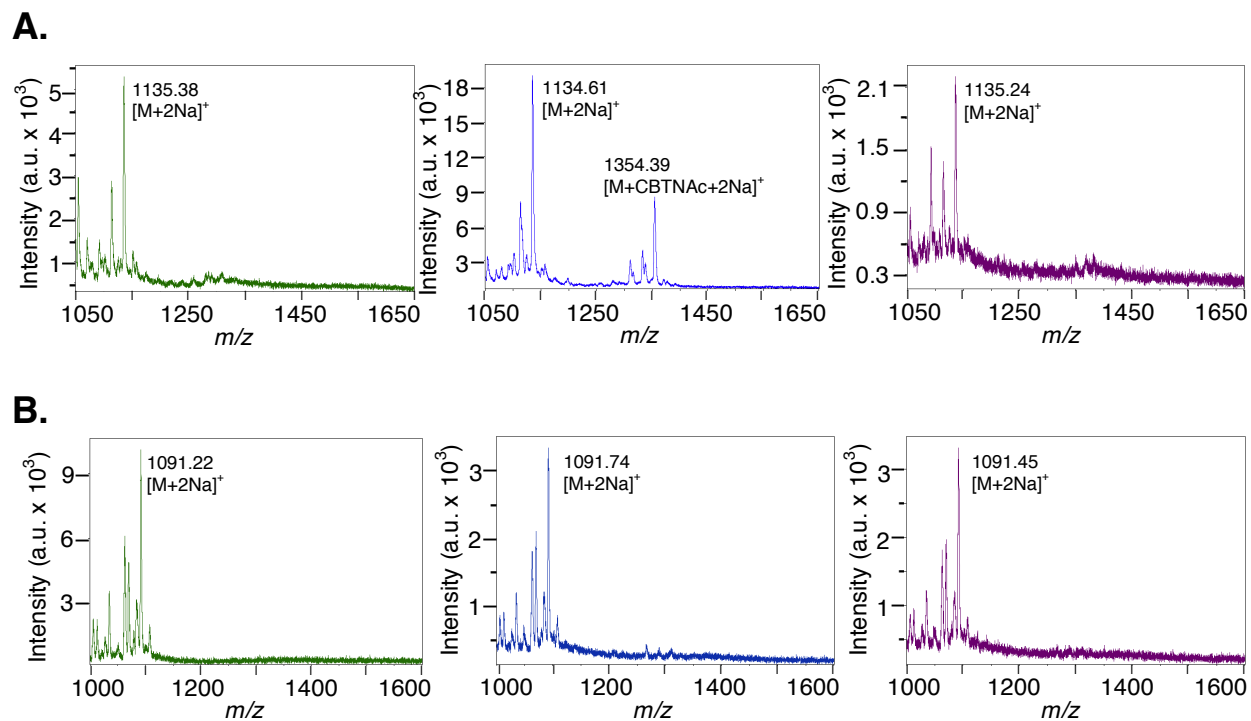

**Figure S3.** Results of binding experiment and cysteine competition assays for CBTag 1.0 (K9R) (**A.**) and CBTag 1.0 (C7S) (**B.**). Spectra are analogous to those in Figure 3. The first spectrum in each row corresponds to crude peptide, the second to the results of the binding assay, and the third to the results of the cysteine competition. In **A.**, CBTag 1.0 (K9R) is partially modified by one equivalent of CBTNAc, and that equivalent is removed by cysteine treatment, suggesting that, as expected, the modification is on the cysteine residue. In **B.**, CBTag 1.0 (C7S) is not at all modified by CBTNAc, implying that the cysteine residue is necessary for lysine modification.

**A. Cysteine treatment, +/- chloroacetate**

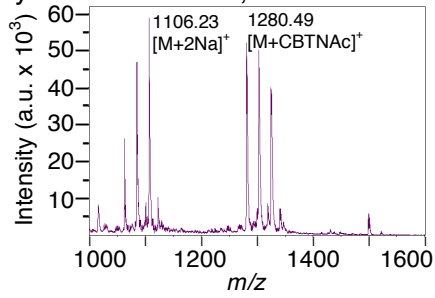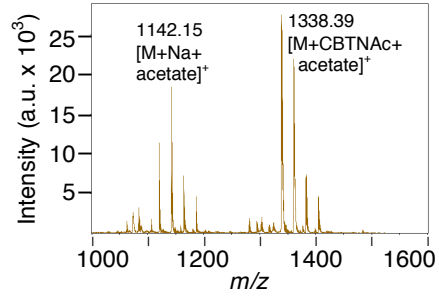

**B. No cysteine treatment, +/- chloroacetate**

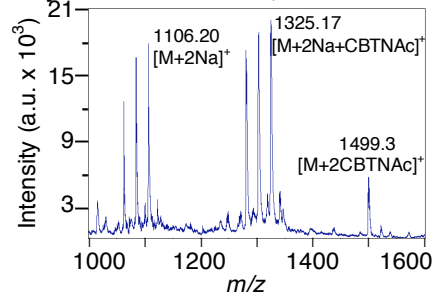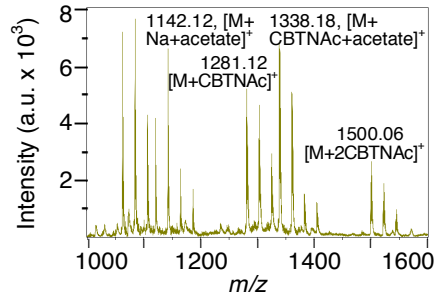

**C. CBTAg 1.0 pretreated with chloroacetate, +/- CBTNAC**

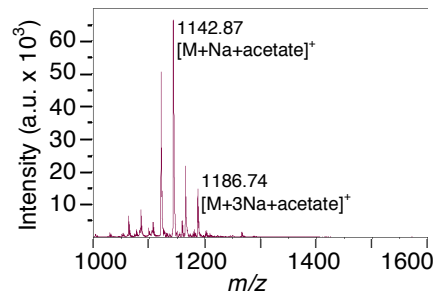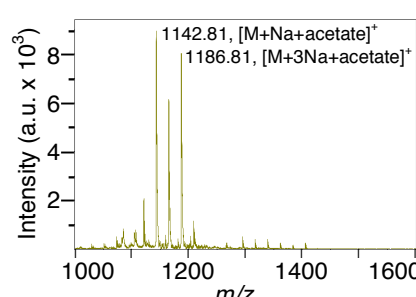

**D.**

**CBTAg 1.0 (K9R) +/- chloroacetate**

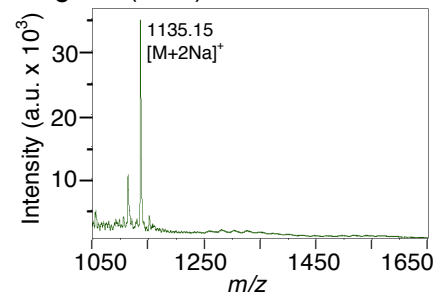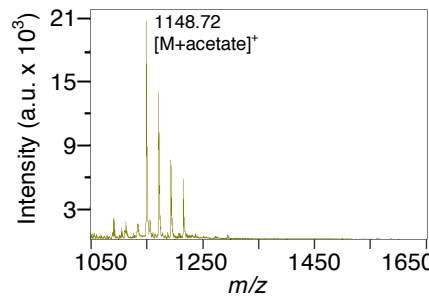

**CBTAg 1.0 (C7S) +/- chloroacetate**

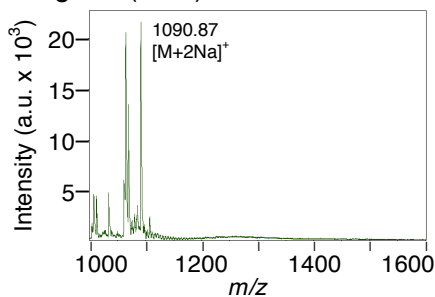

**Figure S4.** Results of chloroacetate labeling of thiols under various conditions. **A.** The left MALDI-TOF MS spectrum is after cysteine treatment of CBTag 1.0 that had been reacted with CBTNAc. The right spectrum are the results of treating the sample in the left spectrum with chloroacetate. The peaks shift by 57  $m/z$ , indicating labeling of a thiol and suggesting CBTNAc is attached to the lysine residue. **B.** The left MALDI-TOF MS spectrum is after CBTag 1.0 was reacted with CBTNAc but before cysteine treatment. Chloroacetate treatment of this sample gave the spectrum on the right, where one population of the singly modified peptide was labeled (lysine adduct) and another was not (cysteine adduct). The peptide modified by two equivalents of CBTNAc was not labeled by chloroacetate. **C.** When CBTag 1.0 was pretreated with chloroacetate (left), no CBTNAc reacted with the resulting peptide (right). **D.** As a control to confirm chloroacetate thiol specificity, CBTag 1.0 (K9R) (top left) and CBTag 1.0 (C7S) (bottom left) were treated with chloroacetate. Only CBTag 1.0 (K9R) (top right) was labeled, confirming that lysine residues are not modified by chloroacetate.

**A. Predicted <sup>13</sup>C NMR Spectrum**

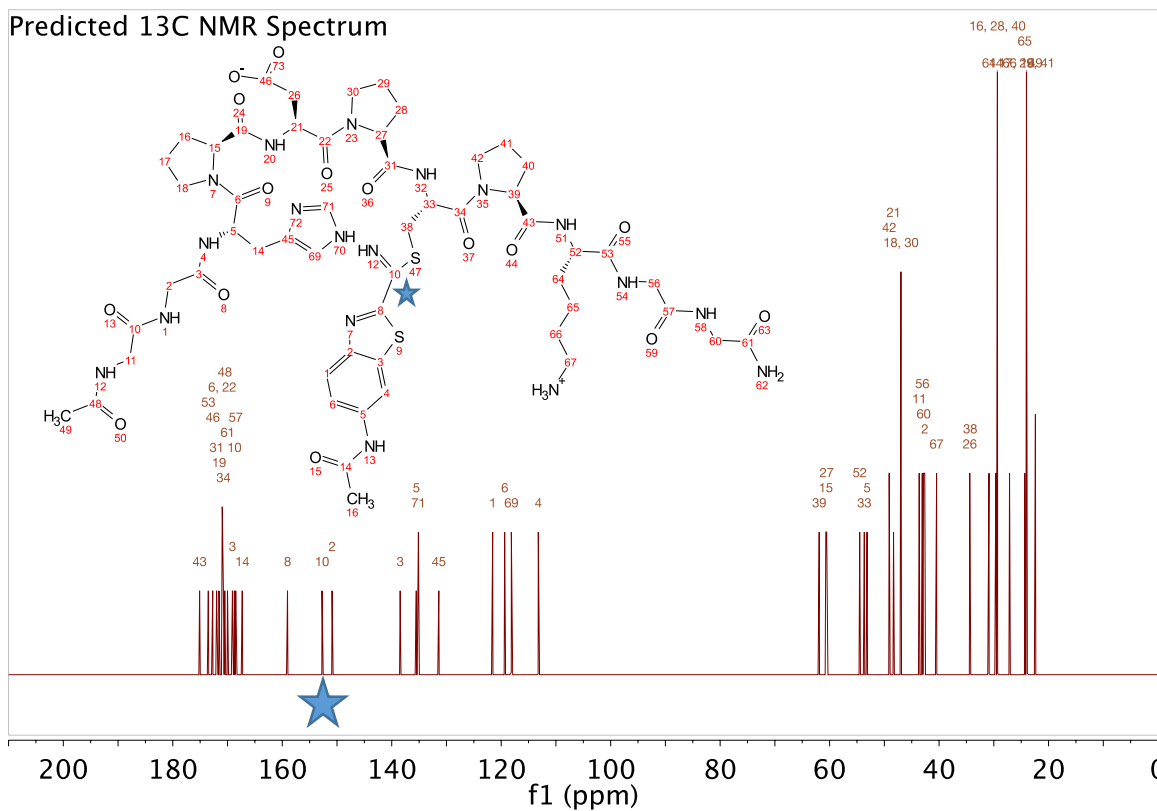

**B. Predicted <sup>13</sup>C NMR Spectrum**

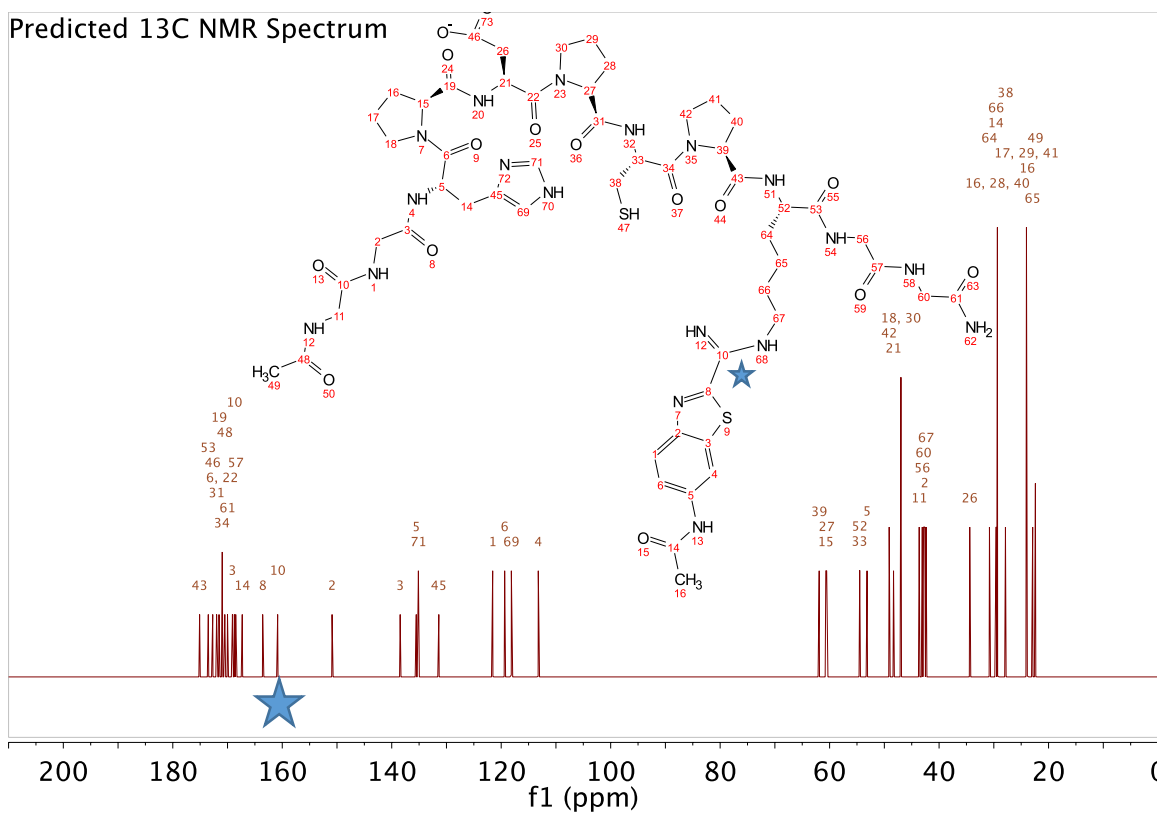

C.

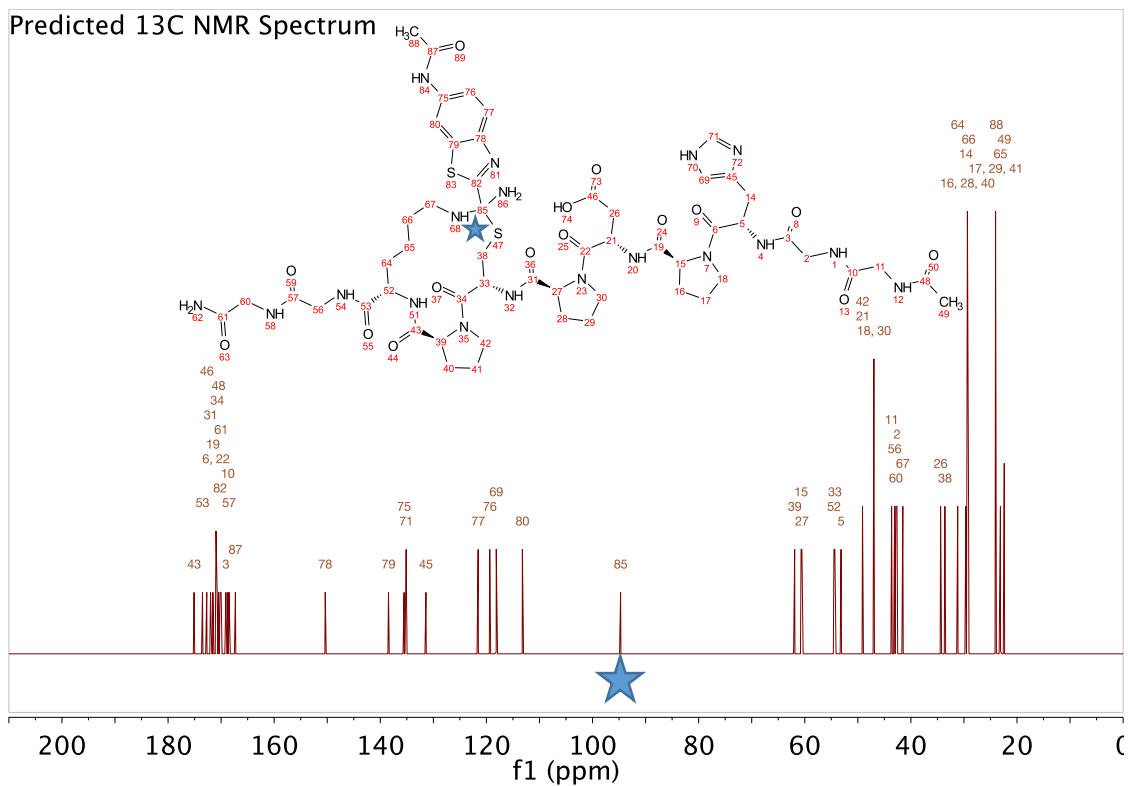

D.

030118\_PEPFOLD-3-13CBTNAc\_pure\_90-10-H2O-D2O-CD3CN\_12000s\_d1-2\_13C13par

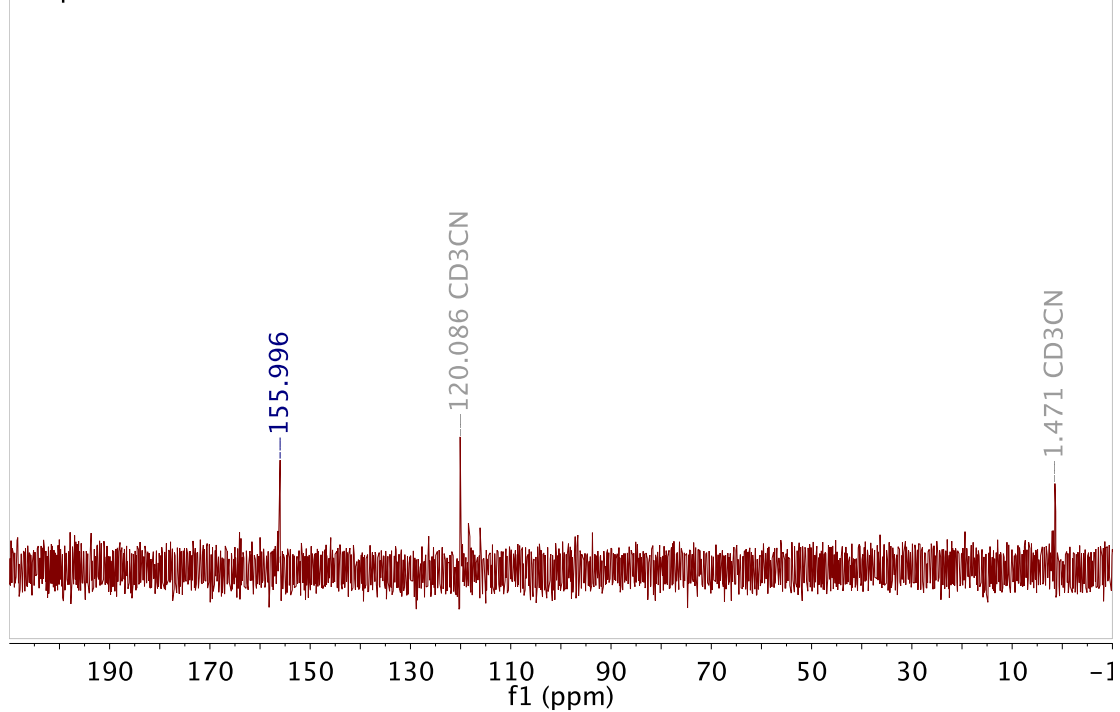



**Figure S5.**  $^{13}\text{C}$  NMR confirms that the final CBTag 1.0-CBTNAc adduct is not the tetrahedral intermediate. **A.-C.**, Predicted spectra (MestreNova) for the cysteine adduct, the lysine adduct, and the tetrahedral intermediate.  $\alpha$ -Carbon and corresponding peak are labelled with a blue star. **D.**  $^{13}\text{C}$  NMR spectrum of (dilute) purified CBTag 1.0- $^{13}\text{C}$ BTNAc shows that the peak corresponding to the  $^{13}\text{C}$ -labelled  $\alpha$ -carbon is at 156 ppm (referenced to acetonitrile- $d_3$  methyl peak), which is similar to the predicted values for the lysine and cysteine adducts but significantly different from the predicted value for the tetrahedral intermediate.

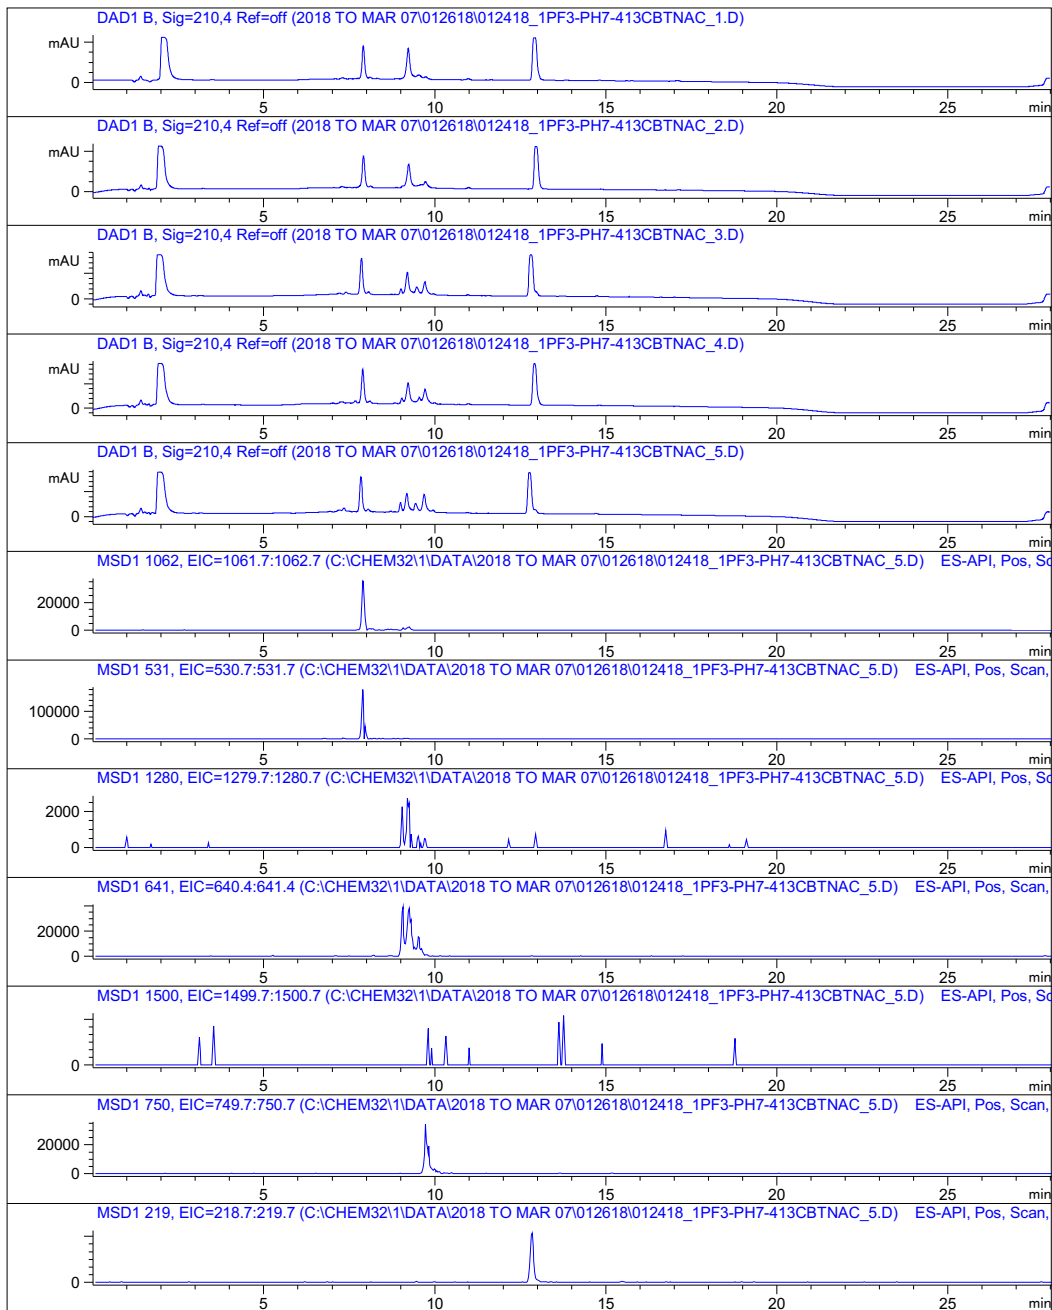

**Figure S6.** Overlay of LC-MS chromatographs for 1:4 CBTag 1.0/13CBTNAc over the time-course experiment and extracted mass ions. Identities of extracted mass ions: 1062 m/z, minute 7.9 – [CBTag 1.0 + H]<sup>+</sup>; 531 m/z, minute 7.9 – [CBTag 1.0 + 2H]<sup>2+</sup>; 1280 m/z, minutes 9 and 9.2 – [CBTag 1.0-13CBTNAc + H]<sup>+</sup>; 641 m/z, minutes 9 and 9.2 – [CBTag 1.0-13CBTNAc + 2H]<sup>2+</sup>; 1500 m/z, insignificant signal – [CBTag 1.0-2(13CBTNAc) + H]<sup>+</sup>; 750 m/z, minute 9.7 – [CBTag 1.0-2(13CBTNAc) + 2H]<sup>2+</sup>; 219 m/z, minute 12.9 – [13CBTNAc + H]<sup>+</sup>

Print of window 38: Current Chromatogram(s)

Data File : C:\CHEM32\1\DATA\2018 TO MAR 07\010518\010518\_1MMPEPFOLD-3-1MMCBTNAC-2MMTCEP\_6.D

Sample Name : 010518\_1mMpepfold-3-1mMcbtnac-2mMTCEP\_6

=====

|                                    |                        |
|------------------------------------|------------------------|
| Acq. Operator : sglk               | Seq. Line : 99         |
| Acq. Instrument : Instrument 1     | Location : Vial 23     |
| Injection Date : 1/7/18 4:19:26 PM | Inj : 1                |
|                                    | Inj Volume : 15.000 µl |

Different Inj Volume from Sequence ! Actual Inj Volume : 10.000 µl

Acq. Method : D:\CHEM32\1\METHODS\AP\_C18\_INSERT.M

Last changed : 11/10/17 3:07:57 PM by Mason

Analysis Method : Z:\DESKTOP\BERTOZZI LAB\LCMS INFO\LCMS METHODS TO 112917\SGLK\_BERTOZZI\_BP\_WITHINSERT.M

Last changed : 3/8/18 8:51:08 AM

(modified after loading)

Additional Info : Peak(s) manually integrated

Current Chromatogram(s)

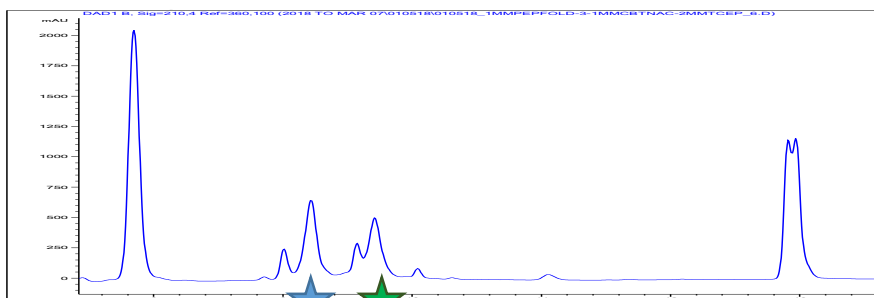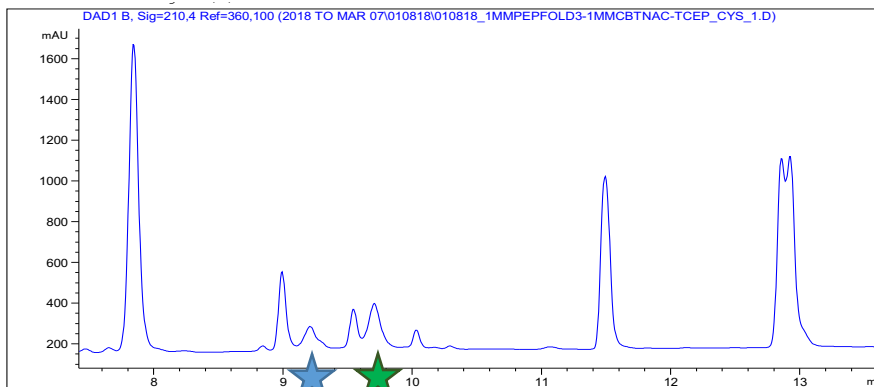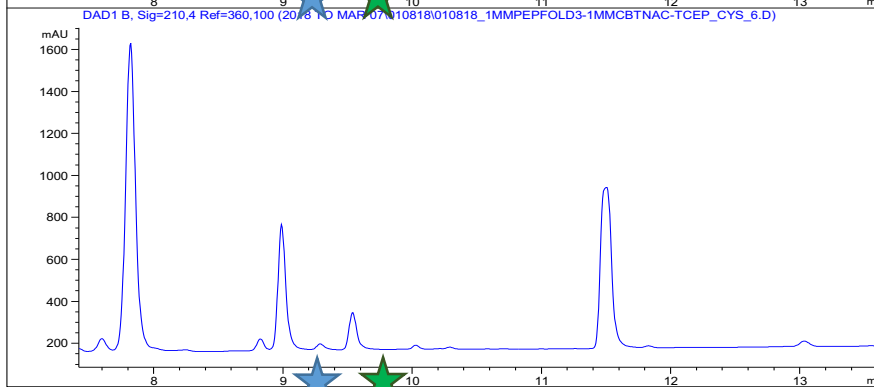

**Figure S7.** Cysteine treatment identifies peaks that contain cysteine adducts. Top spectrum was before cysteine treatment, middle was from an early time point during cysteine treatment, and bottom spectrum was at the end of the time-course assay. Based on these results and the mass spectrum in Figure S6, the blue star (minute 9.2) indicates the cysteine adduct, while the green star (minute 9.7) indicates the doubly modified peptide; the peak at minute 9 is the lysine adduct.

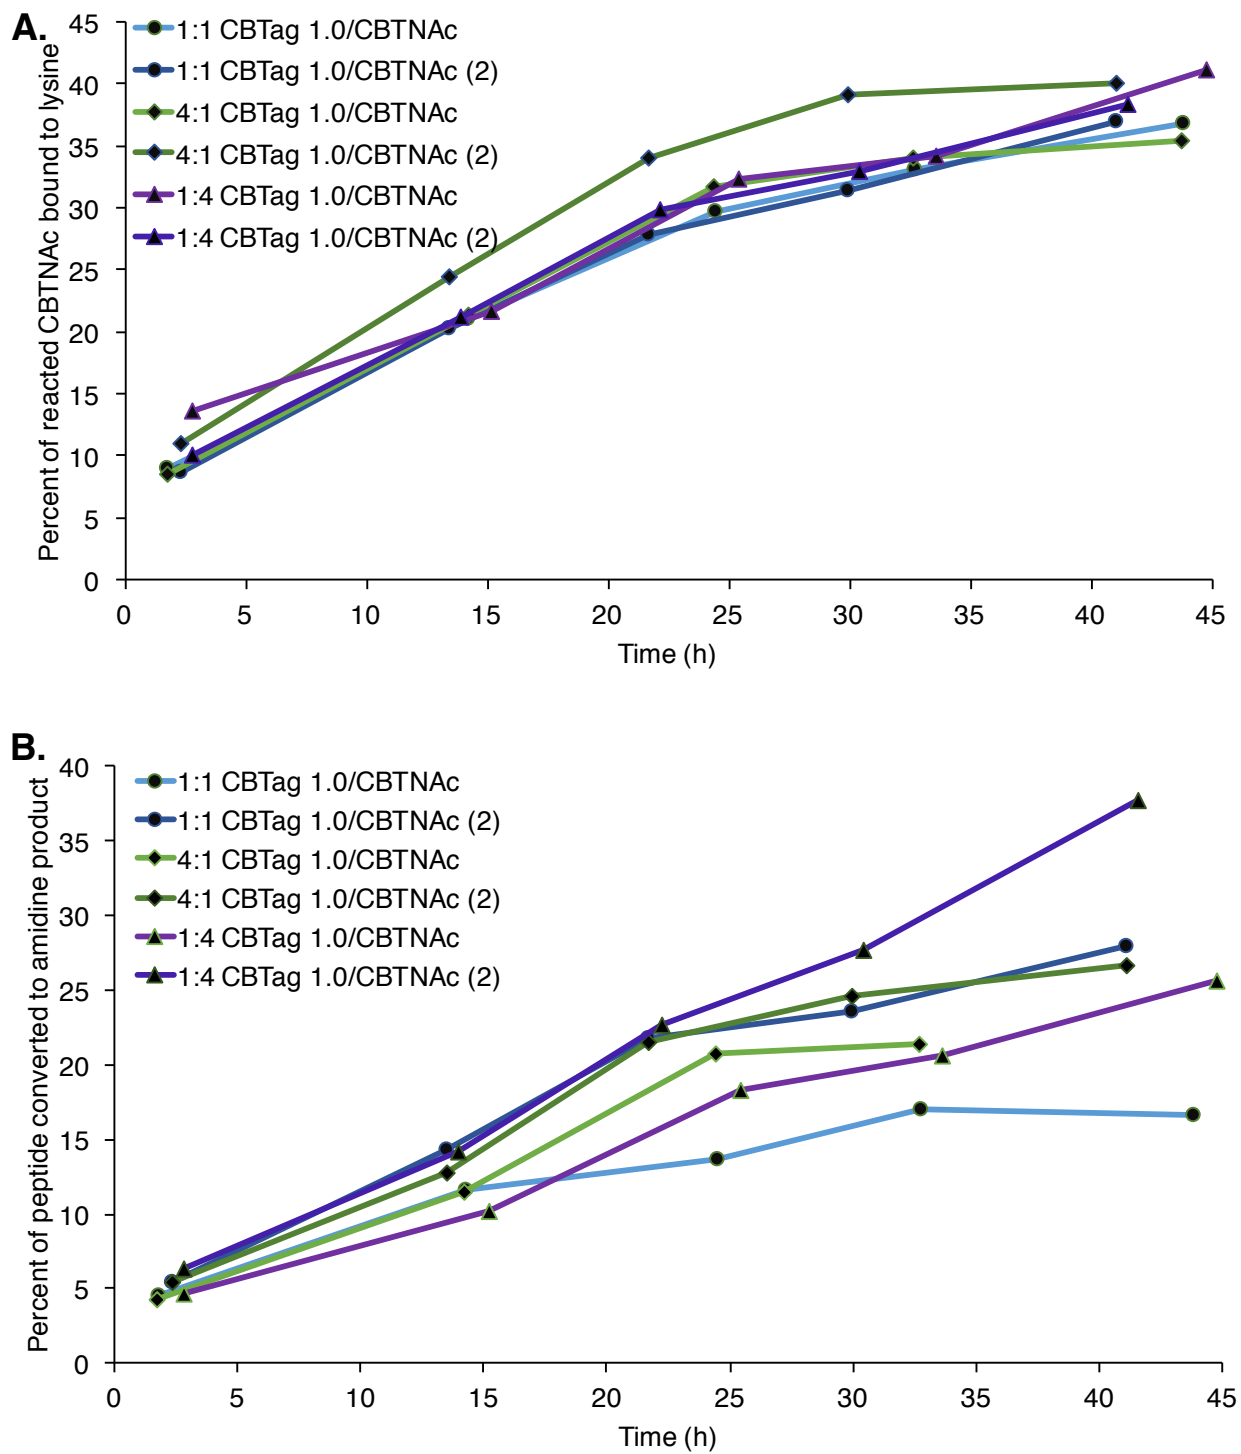

**Figure S8.** LC-MS-based time-course data for the reaction between CBTag 1.0 and CBTNAc. **A)** Percent of the CBTNAc bound to a peptide that is ligated through an amidine bond over time. **B)** Percent of the peptide that was converted to the amidine product over time. Blue lines and circular

markers represent two replicates of the reaction between CBTag 1.0 (22.5 mM) and CBTNAc (22.5 mM). Green lines and diamond markers represent two replicates of the reaction between CBTag 1.0 (22.5 mM) and CBTNAc (5.63 mM). The last time point of the first replicate is not shown because an instrument error during injection resulted in overall lower-than-expected signal. Purple lines and triangular markers represent two replicates of the reaction between CBTag 1.0 (5.63 mM) and CBTNAc (22.5 mM). Spreadsheets containing the corresponding calculations, LC-MS spectra, and LC-MS integration results are in Tables S2-S4 and the section following Figure S13.



Print of window 38: Current Chromatogram(s)  
Data File : C:\CHEM32\...TA\2018 TO MAR 07\010518\010518\_1MMPEPFOLD-3R-1MM13CBTNAC-2MMTCEP.D  
Sample Name : 010518\_1mMpepfold-3R-1mMcbtnac-2mMTCEP\_1  
=====

|                                    |                               |
|------------------------------------|-------------------------------|
| Acq. Operator : sglk               | Seq. Line : 21                |
| Acq. Instrument : Instrument 1     | Location : Vial 31            |
| Injection Date : 1/6/18 2:26:29 AM | Inj : 1                       |
|                                    | Inj Volume : 15.000 µl        |
|                                    | Actual Inj Volume : 10.000 µl |

Different Inj Volume from Sequence !  
Acq. Method : D:\CHEM32\1\METHODS\AP\_C18\_INSERT.M  
Last changed : 11/10/17 3:07:57 PM by Mason  
Analysis Method : Z:\DESKTOP\BERTOZZI LAB\LCMS INFO\LCMS METHODS TO 112917\SLK\_BERTOZZI\_BPWITHINSERT.M  
Last changed : 3/8/18 8:51:08 AM  
(modified after loading)  
Additional Info : Peak(s) manually integrated

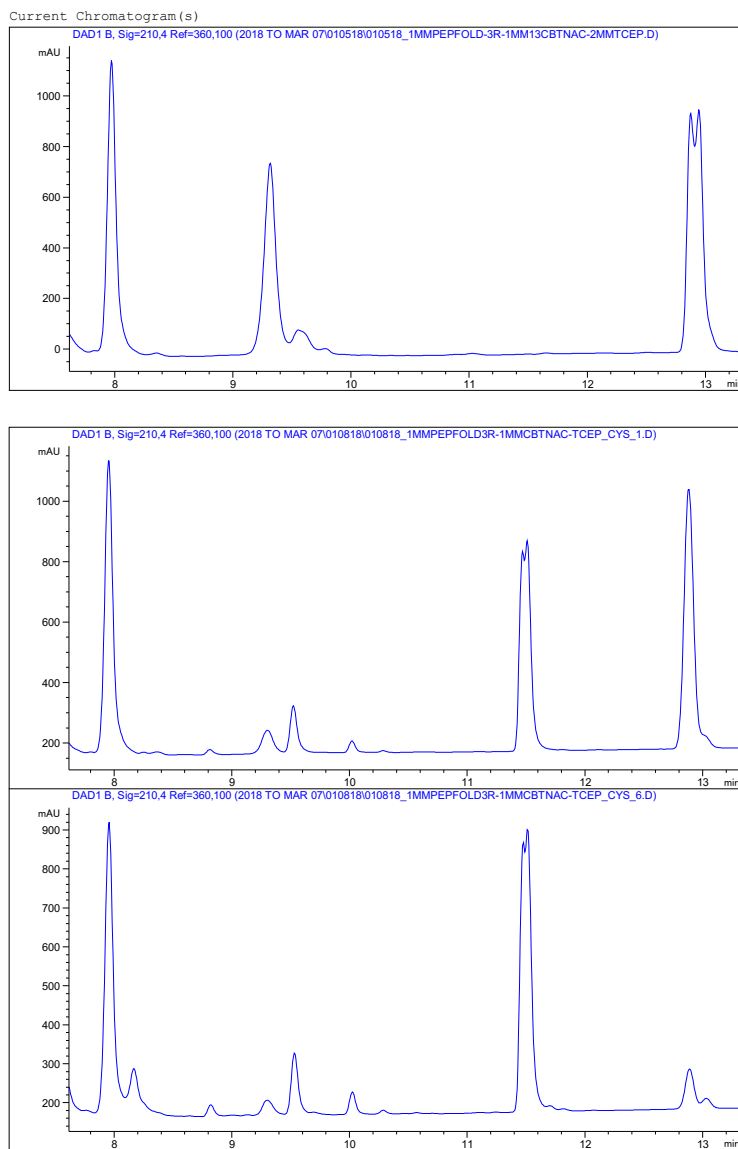

**Figure S10.** Cysteine treatment causes the minute 9.3 peak corresponding to the singly modified CBTAg 1.0 (K9R) to disappear.





**Table S2.** Calculations for 1:1 CBTAG 1.0/13CBTNAc LC-MS time-course assay (two replicates). Spectra and integration results used herein are included after Figure S13.

**\*\*Bolded columns were mentioned in text of paper or used in creation of graphs in Supporting Information**

| Time 0 = 3:16 -                                                                          |                           | Time 0 = 3:16 -          |                     | Time 0 = 3:16 -    |                       | Time 0 = 3:16 -      |                     |
|------------------------------------------------------------------------------------------|---------------------------|--------------------------|---------------------|--------------------|-----------------------|----------------------|---------------------|
| 26-Jan                                                                                   |                           | 26-Jan                   |                     | 26-Jan             |                       | 26-Jan               |                     |
| 0:05:30 =                                                                                |                           | 0:05:30 =                |                     | 0:05:30 =          |                       | 0:05:30 =            |                     |
| 3:10:30                                                                                  |                           | 3:10:30                  |                     | 3:10:30            |                       | 3:10:30              |                     |
|                                                                                          |                           | <b>Actual time point</b> |                     | CBTAg 1.0-Lys-     | CBTAg 1.0-Cys-        | CBTAg 1.0-Cys-       |                     |
|                                                                                          |                           |                          |                     | 13CBTNAc (min      | 13CBTNAc (min         | 13CBTNAc-Lys-        | 13CBTNAc (min       |
| 210 nm                                                                                   | Time of injection in file | (h)                      | CBTAg 1.0 (min 7.9) | 8.99)              | 9.19)                 | 9.7)                 | 13CBTNAc (min 12.9) |
| 012418_Pf3-PH7-13CBTNAc_1                                                                | 4:58:31 p.m.              | <b>1.80</b>              | 19072.5             | 875.5              | 20975.8               | 2091.6               | 19164.1             |
| 012418_Pf3-PH7-13CBTNAc_2                                                                | 5:25:45 a.m.              | <b>14.25</b>             | 21742.2             | 2265.4             | 20082                 | 6531                 | 16769.8             |
| 012418_Pf3-PH7-13CBTNAc_3                                                                | 3:39:38 p.m.              | <b>24.48</b>             | 31604.91            | 2944.3             | 13766.1               | 8471.9               | 13473.4             |
| 012418_Pf3-PH7-13CBTNAc_4                                                                | 11:53:39 p.m.             | <b>32.72</b>             | 28513.8             | 3432               | 13322.2               | 10263.3              | 14764.6             |
| 012418_Pf3-PH7-13CBTNAc_5                                                                | 11:01:48 a.m.             | <b>43.85</b>             | 25995.5             | 2775.6             | 8668.3                | 8322.7               | 13238.1             |
| Time 0 = 3:16 -                                                                          |                           |                          |                     |                    |                       |                      |                     |
| 26-Jan                                                                                   |                           | 26-Jan                   |                     | 26-Jan             |                       | 26-Jan               |                     |
| 0:05:30 =                                                                                |                           | 0:05:30 =                |                     | 0:05:30 =          |                       | 0:05:30 =            |                     |
| 3:10:30                                                                                  |                           | 3:10:30                  |                     | 3:10:30            |                       | 3:10:30              |                     |
|                                                                                          |                           | <b>Actual time point</b> |                     | CBTAg 1.0-Lys-     | CBTAg 1.0-Cys-        | CBTAg 1.0-Cys-       |                     |
|                                                                                          |                           |                          |                     | 13CBTNAc (min      | 13CBTNAc (min         | 13CBTNAc-Lys-        | 13CBTNAc (min       |
| 254 nm                                                                                   | Time of injection in file | (h)                      | CBTAg 1.0 (min 7.9) | 8.99)              | 9.19)                 | 9.7)                 | 13CBTNAc (min 12.9) |
| 012418_Pf3-PH7-13CBTNAc_1                                                                | 4:58:31 p.m.              | <b>1.80</b>              | 138.3               | 4066.1             | 583                   | 16074.4              |                     |
| 012418_Pf3-PH7-13CBTNAc_2                                                                | 5:25:45 a.m.              | <b>14.25</b>             | 365.8               | 3527.3             | 1575.1                | 11460.9              |                     |
| 012418_Pf3-PH7-13CBTNAc_3                                                                | 3:39:38 p.m.              | <b>24.48</b>             | 579.3               | 2843.1             | 2145.2                | 11569.5              |                     |
| 012418_Pf3-PH7-13CBTNAc_4                                                                | 11:53:39 p.m.             | <b>32.72</b>             | 561                 | 2454               | 2562.6                | 12511.7              |                     |
| 012418_Pf3-PH7-13CBTNAc_5                                                                | 11:01:48 a.m.             | <b>43.85</b>             | 445.7               | 1461.1             | 1937.3                | 9349.3               |                     |
| Assumption: area under modified peptide peaks is proportional to number of modifications |                           |                          |                     |                    |                       |                      |                     |
| 210 nm                                                                                   |                           |                          |                     |                    |                       |                      |                     |
|                                                                                          |                           |                          |                     | All peptide: Sum   |                       | Percent of total     |                     |
|                                                                                          |                           |                          |                     | CBTAg 1.0-Lys-     |                       | peptide that has any |                     |
|                                                                                          |                           |                          |                     | 13CBTNAc, CBTAg    |                       | 13CBTNAc             |                     |
| Lysine-modified:                                                                         | Any modification: Sum     |                          |                     | 1.0-Cys-           | Percent of reacted    | modification ((Any   |                     |
| Sum CBTAg 1.0-Lys-                                                                       | CBTAg 1.0-Lys-            |                          |                     | 13CBTNAc,          | 13CBTNAc bound        | modification -       |                     |
| 13CBTNAc and                                                                             | 13CBTNAc, CBTAg 1.0-      |                          |                     | 1/2(CBTAg 1.0-Cys- | to a lysine (Lysine-  | 1/2(CBTAg 1.0-Cys-   |                     |
| 1/2(CBTAg 1.0-Cys-                                                                       | Cys-13CBTNAc, CBTAg       |                          |                     | 13CBTNAc-Lys-      | modified/Any          | 13CBTNAc-Lys-        |                     |
| 13CBTNAc-Lys-                                                                            | 1.0-Cys-13CBTNAc-Lys-     |                          |                     | modification)      | modification)         | 13CBTNAc)/All        |                     |
| 13CBTNAc)                                                                                | 13CBTNAc                  |                          |                     |                    | modified/All peptide) | peptide)             |                     |
| 1921.3                                                                                   | 23942.9                   |                          |                     | 41969.6            | 8.024508309           | 54.5563932           |                     |
| 5530.9                                                                                   | 28878.4                   |                          |                     | 47355.1            | 19.15237686           | 54.08688821          |                     |
| 7180.25                                                                                  | 25182.3                   |                          |                     | 52551.26           | 28.5130826            | 39.85889206          |                     |
| 8563.65                                                                                  | 27017.5                   |                          |                     | 50399.65           | 31.69667808           | 43.42460712          |                     |
| 6936.95                                                                                  | 19766.6                   |                          |                     | 41600.75           | 35.09430049           | 37.5119439           |                     |
| 254 nm                                                                                   |                           |                          |                     |                    |                       |                      |                     |
|                                                                                          |                           |                          |                     | Percent of         |                       | Percent of total     |                     |
|                                                                                          |                           |                          |                     | reacted            |                       | peptide that has any |                     |
|                                                                                          |                           |                          |                     | 13CBTNAc bound     |                       | 13CBTNAc             |                     |
|                                                                                          |                           |                          |                     | to a lysine        |                       | modification ((Any   |                     |
|                                                                                          |                           |                          |                     | (Lysine-           |                       | modification -       |                     |
|                                                                                          |                           |                          |                     | modified/Any       |                       | 1/2(CBTAg 1.0-Cys-   |                     |
|                                                                                          |                           |                          |                     | modification)      |                       | 13CBTNAc-Lys-        |                     |
|                                                                                          |                           |                          |                     |                    |                       | 13CBTNAc)/All        |                     |
|                                                                                          |                           |                          |                     |                    |                       | peptide)             |                     |
| Lysine-modified:                                                                         | Any modification: Sum     |                          |                     | 429.8              | 4787.4                | 8.977733216          |                     |
| Sum CBTAg 1.0-Lys-                                                                       | CBTAg 1.0-Lys-            |                          |                     | 1153.35            | 5468.2                | 21.09194982          |                     |
| 13CBTNAc and                                                                             | 13CBTNAc, CBTAg 1.0-      |                          |                     | 1651.9             | 5567.6                | 29.66987571          |                     |
| 1/2(CBTAg 1.0-Cys-                                                                       | Cys-13CBTNAc, CBTAg       |                          |                     | 1842.3             | 5577.6                | 33.03033563          |                     |
| 13CBTNAc-Lys-                                                                            | 1.0-Cys-13CBTNAc-Lys-     |                          |                     | 1414.35            | 3844.1                | 36.79274733          |                     |
| 13CBTNAc)                                                                                | 13CBTNAc                  |                          |                     |                    |                       |                      |                     |

|                           | Time 0 = 5:02 -<br>0:05:30 = | 4:56:30                          |                     |                                 | *a lot of these<br>peaks were<br>saturated | using 280 nm as<br>control      | 13CBTNac 210 nm | *(Ratio of CBTAg 1.0-<br>Cys 280 | CBTag 1.0-Cys-<br>13CBTNac-Lys-<br>13CBTNac (min | 13CBTNac (min 12.9) |
|---------------------------|------------------------------|----------------------------------|---------------------|---------------------------------|--------------------------------------------|---------------------------------|-----------------|----------------------------------|--------------------------------------------------|---------------------|
|                           |                              | <b>Actual time point<br/>(h)</b> | CBTag 1.0 (min 7.9) | CBTag 1.0-Lys-<br>13CBTNac (min | CBTag 1.0-Cys-<br>13CBTNac (min            | nm/13CBTNac 280                 | nm)             | nm/13CBTNac 280                  | 13CBTNac (min                                    |                     |
| 210 nm                    | Time of injection in file    |                                  |                     |                                 |                                            |                                 |                 |                                  |                                                  |                     |
| 020218_Pf3-PH7-13CBTNac_1 | 6:47:32 p.m.                 | 2.33                             | 14758.6             | 8.99                            | 9.19                                       | 20164.3                         | 21027.50305     | 2894.9                           | 8795.9                                           |                     |
| 020218_Pf3-PH7-13CBTNac_2 | 5:55:51 a.m.                 | 13.47                            | 15407.4             | 1732.7                          | 24026.3                                    | 24579.91136                     | 11859.8         | 11314.4                          |                                                  |                     |
| 020218_Pf3-PH7-13CBTNac_3 | 2:09:56 p.m.                 | 21.71                            | 11620.8             | 2901.1                          | 16445.3                                    | 18346.71955                     | 15010.7         | 9674.1                           |                                                  |                     |
| 020218_Pf3-PH7-13CBTNac_4 | 10:23:55 p.m.                | 29.94                            | 11865.8             | 3692.2                          | 17331.6                                    | 18916.25472                     | 16845.4         | 4868.5                           |                                                  |                     |
| 020218_Pf3-PH7-13CBTNac_5 | 9:32:20 a.m.                 | 41.08                            | 8382.1              | 3265.7                          | 12603.9                                    | 10621.54062                     | 13433.9         | 4078.5                           |                                                  |                     |
| 280 nm                    |                              |                                  |                     | control for<br>saturation       | CBTag 1.0-Cys<br>280 nm                    | Ratio of CBTAg 1.0-<br>Cys 280  | nm/13CBTNac 280 |                                  | 13CBTNac 280 nm                                  |                     |
|                           |                              |                                  |                     |                                 | 4321.66                                    | 2.390602787                     |                 | 1807.77                          |                                                  |                     |
|                           |                              |                                  |                     |                                 | 4781.66                                    | 2.172444969                     |                 | 2201.05                          |                                                  |                     |
|                           |                              |                                  |                     |                                 | 4214.79                                    | 1.896478179                     |                 | 2222.43                          |                                                  |                     |
|                           |                              |                                  |                     |                                 | 3953.2                                     | 3.885437962                     |                 | 1017.44                          |                                                  |                     |
|                           |                              |                                  |                     |                                 | 1891.59                                    | 2.604276234                     |                 | 726.34                           |                                                  |                     |
| 254 nm                    | Time 0 = 5:02 -<br>0:05:30 = | 4:56:30                          |                     |                                 | *a lot of these<br>peaks were<br>saturated |                                 |                 |                                  |                                                  |                     |
|                           |                              | <b>Actual time point<br/>(h)</b> | CBTag 1.0 (min 7.9) | CBTag 1.0-Lys-<br>13CBTNac (min | CBTag 1.0-Cys-<br>13CBTNac (min            | CBTag 1.0-Cys-<br>13CBTNac (min | 13CBTNac (min   | 13CBTNac (min 12.9)              |                                                  |                     |
| 020218_Pf3-PH7-13CBTNac_1 | 6:47:32 p.m.                 | 2.33                             |                     | 8.99                            | 9.19                                       | 6653.1                          | 1016            | 4049.4                           |                                                  |                     |
| 020218_Pf3-PH7-13CBTNac_2 | 5:55:51 a.m.                 | 13.47                            |                     | 449.1                           | 6981.6                                     | 3533.3                          | 5390            |                                  |                                                  |                     |
| 020218_Pf3-PH7-13CBTNac_3 | 2:09:56 p.m.                 | 21.71                            |                     | 668.3                           | 5847.8                                     | 5163.1                          | 5270.8          |                                  |                                                  |                     |
| 020218_Pf3-PH7-13CBTNac_4 | 10:23:55 p.m.                | 29.94                            |                     | 900.5                           | 5806.4                                     | 6531.1                          | 2182.5          |                                  |                                                  |                     |
| 020218_Pf3-PH7-13CBTNac_5 | 9:32:20 a.m.                 | 41.08                            |                     | 765.4                           | 3172                                       | 5281                            | 1729            |                                  |                                                  |                     |

Assumption: area under modified peptide peaks is proportional to number of modifications  
210 nm

| Lysine-modified:<br>Sum CBTAG 1.0-Lys-<br>13CBTNac and<br>1/2(CBTAG 1.0-Cys-<br>13CBTNac-Lys-<br>13CBTNac) | Any modification:<br>Sum CBTAG 1.0-Lys-<br>13CBTNac, CBTAG 1.0-<br>Cys-13CBTNac, CBTAG<br>1.0-Cys-13CBTNac-Lys-<br>13CBTNac | All peptide: Sum<br>CBTAG 1.0-Lys-<br>13CBTNac, CBTAG<br>1.0-Cys-<br>13CBTNac,<br>1/2(CBTAG 1.0-Cys-<br>13CBTNac-Lys-<br>13CBTNac) | Percent of reacted<br>13CBTNac bound<br>to a lysine (Lysine-<br>modified/Any<br>modification) | Percent of total<br>peptide with a<br>modification on lysine<br>(Lysine-modified/All<br>peptide) | Percent of total peptide<br>that has any 13CBTNac<br>modification ((Any<br>modification -<br>1/2(CBTAG 1.0-Cys-<br>13CBTNac-Lys-<br>13CBTNac))/All<br>peptide) |
|------------------------------------------------------------------------------------------------------------|-----------------------------------------------------------------------------------------------------------------------------|------------------------------------------------------------------------------------------------------------------------------------|-----------------------------------------------------------------------------------------------|--------------------------------------------------------------------------------------------------|----------------------------------------------------------------------------------------------------------------------------------------------------------------|
| 2115.15                                                                                                    | 23726.9                                                                                                                     | 37038.05                                                                                                                           | 8.914565325                                                                                   | 5.710748811                                                                                      | 60.15286982                                                                                                                                                    |
| 7662.6                                                                                                     | 37618.8                                                                                                                     | 47096.3                                                                                                                            | 20.36907078                                                                                   | 16.27006792                                                                                      | 67.28532815                                                                                                                                                    |
| 10406.45                                                                                                   | 34357.1                                                                                                                     | 38472.55                                                                                                                           | 30.28908144                                                                                   | 27.04902586                                                                                      | 69.79456782                                                                                                                                                    |
| 12114.9                                                                                                    | 37869.2                                                                                                                     | 41312.3                                                                                                                            | 31.99143367                                                                                   | 29.32516466                                                                                      | 71.27780346                                                                                                                                                    |
| 9982.65                                                                                                    | 29303.5                                                                                                                     | 30968.65                                                                                                                           | 34.06640845                                                                                   | 32.23469541                                                                                      | 72.93359575                                                                                                                                                    |

| Lysine-modified:<br>Sum CBTAG 1.0-Lys-<br>13CBTNac and<br>1/2(CBTAG 1.0-Cys-<br>13CBTNac-Lys-<br>13CBTNac) | Any modification<br>(adjusted for saturation):<br>Sum CBTAG 1.0-Lys-<br>13CBTNac, CBTAG 1.0-<br>Cys-13CBTNac, CBTAG<br>1.0-Cys-13CBTNac-Lys-<br>13CBTNac | All peptide<br>(adjusted for<br>saturation): Sum<br>CBTAG 1.0-Lys-<br>13CBTNac, CBTAG<br>1.0-Cys-<br>13CBTNac,<br>1/2(CBTAG 1.0-Cys-<br>13CBTNac-Lys-<br>13CBTNac) | Percent of reacted<br>13CBTNac bound<br>to a lysine<br>(adjusted for<br>saturation) (Lysine-<br>modified/Any<br>modification) | Percent of total<br>peptide with a<br>modification on<br>lysine (adjusted for<br>saturation) (Lysine-<br>modified/All peptide) | Percent of total<br>peptide that has any<br>13CBTNac<br>modification (adjusted<br>for saturation) ((Any<br>modification -<br>1/2(CBTAG 1.0-Cys-<br>13CBTNac-Lys-<br>13CBTNac))/All<br>peptide) |
|------------------------------------------------------------------------------------------------------------|----------------------------------------------------------------------------------------------------------------------------------------------------------|--------------------------------------------------------------------------------------------------------------------------------------------------------------------|-------------------------------------------------------------------------------------------------------------------------------|--------------------------------------------------------------------------------------------------------------------------------|------------------------------------------------------------------------------------------------------------------------------------------------------------------------------------------------|
| 2115.15                                                                                                    | 24590.10305                                                                                                                                              | 39348.70305                                                                                                                                                        | 8.601631296                                                                                                                   | 5.375399533                                                                                                                    | 58.81427152                                                                                                                                                                                    |
| 7662.6                                                                                                     | 38172.41136                                                                                                                                              | 53579.81136                                                                                                                                                        | 20.07365981                                                                                                                   | 14.30128215                                                                                                                    | 60.17660485                                                                                                                                                                                    |
| 10406.45                                                                                                   | 36258.51955                                                                                                                                              | 47879.31955                                                                                                                                                        | 28.70070297                                                                                                                   | 21.73474915                                                                                                                    | 60.05342144                                                                                                                                                                                    |
| 12114.9                                                                                                    | 39453.85472                                                                                                                                              | 51319.65472                                                                                                                                                        | 30.70650533                                                                                                                   | 23.60674495                                                                                                                    | 60.46641367                                                                                                                                                                                    |
| 9982.65                                                                                                    | 27321.14062                                                                                                                                              | 35703.24062                                                                                                                                                        | 36.53818901                                                                                                                   | 27.960067                                                                                                                      | 57.70958116                                                                                                                                                                                    |

254 nm

| Lysine-modified:<br>Sum CBTAG 1.0-Lys-<br>13CBTNac and<br>1/2(CBTAG 1.0-Cys-<br>13CBTNac-Lys-<br>13CBTNac) | Any modification:<br>Sum CBTAG 1.0-Lys-<br>13CBTNac, CBTAG 1.0-<br>Cys-13CBTNac, CBTAG<br>1.0-Cys-13CBTNac-Lys-<br>13CBTNac | Percent of<br>reacted<br>13CBTNac bound<br>to a lysine<br>(Lysine-<br>modified/Any<br>modification) |
|------------------------------------------------------------------------------------------------------------|-----------------------------------------------------------------------------------------------------------------------------|-----------------------------------------------------------------------------------------------------|
| 675.6                                                                                                      | 7836.7                                                                                                                      | 8.620975666                                                                                         |
| 2215.75                                                                                                    | 10964                                                                                                                       | 20.20932142                                                                                         |
| 3249.85                                                                                                    | 11679.2                                                                                                                     | 27.82596411                                                                                         |
| 4166.05                                                                                                    | 13238                                                                                                                       | 31.47038828                                                                                         |
| 3405.9                                                                                                     | 9218.4                                                                                                                      | 36.94675866                                                                                         |

**Table S3.** Calculations for 1:4 CBTAg 1.0/13CBTNAC LC-MS time-course assay (two replicates). Spectra and integration results

used herein are included after Figure S13.

| 26-Jan                      |                           | Time 0 = 3:20 -              |                      | 0:05:30 =                                                                  |                                                                                                           | 3:14:30                                                                                 |                                                                                             |
|-----------------------------|---------------------------|------------------------------|----------------------|----------------------------------------------------------------------------|-----------------------------------------------------------------------------------------------------------|-----------------------------------------------------------------------------------------|---------------------------------------------------------------------------------------------|
|                             |                           |                              |                      |                                                                            |                                                                                                           | CBTag 1.0-Cys-13CBTNAC-Lys-13CBTNAC (min 9.7)                                           |                                                                                             |
| 210 nm                      | Time of injection in file | <b>Actual time point (h)</b> | CBTag 1.0 (min 7.9)  | CBTag 1.0-Lys-13CBTNAC (min 8.99)                                          | CBTag 1.0-Cys-13CBTNAC (min 9.19)                                                                         | 13CBTNAC (min 12.9)                                                                     |                                                                                             |
| 012418_1PF3-PH7-413CBTNAC_1 | 6:02:03 p.m.              | <b>2.81</b>                  | 9417                 | 487.3                                                                      | 12127.8                                                                                                   | 1118.1                                                                                  | 19788.9                                                                                     |
| 012418_1PF3-PH7-413CBTNAC_2 | 6:23:53 a.m.              | <b>15.18</b>                 | 9138.3               | 748.6                                                                      | 8372.4                                                                                                    | 2478                                                                                    | 18214.2                                                                                     |
| 012418_1PF3-PH7-413CBTNAC_3 | 4:37:48 p.m.              | <b>25.41</b>                 | 7891.2               | 1164.3                                                                     | 5924.5                                                                                                    | 3880.2                                                                                  | 14152.5                                                                                     |
| 012418_1PF3-PH7-413CBTNAC_4 | 12:51:47 a.m.             | <b>33.64</b>                 | 8335.7               | 1270.6                                                                     | 6181.5                                                                                                    | 4995.1                                                                                  | 13985.1                                                                                     |
| 012418_1PF3-PH7-413CBTNAC_5 | 12:00:02 p.m.             | <b>44.78</b>                 | 7711.9               | 1694.7                                                                     | 4647.7                                                                                                    | 5140.1                                                                                  | 13714.5                                                                                     |
|                             |                           |                              |                      |                                                                            |                                                                                                           | CBTag 1.0-Cys-13CBTNAC-Lys-13CBTNAC (min 9.7)                                           |                                                                                             |
| 254 nm                      | Time of injection in file | <b>Actual time point (h)</b> |                      | CBTag 1.0-Lys-13CBTNAC (min 8.99)                                          | CBTag 1.0-Cys-13CBTNAC (min 9.19)                                                                         | 13CBTNAC (min 12.9)                                                                     |                                                                                             |
| 012418_1PF3-PH7-413CBTNAC_1 | 6:02:03 p.m.              | <b>2.81</b>                  |                      | 142.4                                                                      | 1966.5                                                                                                    | 394.1                                                                                   | 17591.7                                                                                     |
| 012418_1PF3-PH7-413CBTNAC_2 | 6:23:53 a.m.              | <b>15.18</b>                 |                      | 161.1                                                                      | 1543.8                                                                                                    | 735.6                                                                                   | 13625.9                                                                                     |
| 012418_1PF3-PH7-413CBTNAC_3 | 4:37:48 p.m.              | <b>25.41</b>                 |                      | 203.3                                                                      | 1016.1                                                                                                    | 1075.1                                                                                  | 10742.7                                                                                     |
| 012418_1PF3-PH7-413CBTNAC_4 | 12:51:47 a.m.             | <b>33.64</b>                 |                      | 248.6                                                                      | 1101.1                                                                                                    | 1343.8                                                                                  | 10660                                                                                       |
| 012418_1PF3-PH7-413CBTNAC_5 | 12:00:02 p.m.             | <b>44.78</b>                 |                      | 337.4                                                                      | 775.4                                                                                                     | 1352.4                                                                                  | 9645.9                                                                                      |
|                             |                           |                              |                      |                                                                            |                                                                                                           | Any modification: Sum                                                                   |                                                                                             |
|                             |                           |                              | Lysine-modified: Sum | CBTag 1.0-Lys-13CBTNAC, CBTag 1.0-1/2(CBTag 1.0-Cys-13CBTNAC-Lys-13CBTNAC) | All peptide: Sum CBTag 1.0-Lys-13CBTNAC, CBTag 1.0-Cys-13CBTNAC, 1/2(CBTag 1.0-Cys-13CBTNAC-Lys-13CBTNAC) | <b>Percent of reacted 13CBTNAC bound to a lysine (Lysine-modified/Any modification)</b> | <b>Percent of total peptide with a modification on lysine (Lysine-modified/All peptide)</b> |
|                             |                           |                              | 1046.35              | 13733.2                                                                    | 22591.15                                                                                                  | 7.61912737                                                                              | 4.63168099                                                                                  |
|                             |                           |                              | 1987.6               | 11599                                                                      | 19498.3                                                                                                   | 17.13596                                                                                | 10.1937092                                                                                  |
|                             |                           |                              | 3104.4               | 10969                                                                      | 16920.1                                                                                                   | 28.30157717                                                                             | 18.34740929                                                                                 |
|                             |                           |                              | 3768.15              | 12447.2                                                                    | 18285.35                                                                                                  | 30.27307346                                                                             | 20.60748085                                                                                 |
|                             |                           |                              | 4264.75              | 11482.5                                                                    | 16624.35                                                                                                  | 37.14130198                                                                             | 25.65363458                                                                                 |
|                             |                           |                              |                      | 8912.45                                                                    | 16624.35                                                                                                  |                                                                                         | 25.65363458                                                                                 |
|                             |                           |                              | 339.45               | 2503                                                                       |                                                                                                           | <b>13.56172593</b>                                                                      |                                                                                             |
|                             |                           |                              | 528.9                | 2440.5                                                                     |                                                                                                           | <b>21.67178857</b>                                                                      |                                                                                             |
|                             |                           |                              | 740.85               | 2294.5                                                                     |                                                                                                           | <b>32.28808019</b>                                                                      |                                                                                             |
|                             |                           |                              | 920.5                | 2693.5                                                                     |                                                                                                           | <b>34.17486542</b>                                                                      |                                                                                             |
|                             |                           |                              | 1013.6               | 2465.2                                                                     |                                                                                                           | <b>41.11633945</b>                                                                      |                                                                                             |

**2-Feb** Time 0 = 5:02 -  
0:05:30 = 4:56:30

|                             | Time of injection in file | Actual time point (h) | CBTag 1.0 (min 7.9) | CBTag 1.0-Lys-13CBTNac (min 8.99) | CBTag 1.0-Cys-13CBTNac (min 9.19) | CBTag 1.0-Cys-13CBTNac-Lys-13CBTNac (min 9.7) | 13CBTNac (min 12.9) |
|-----------------------------|---------------------------|-----------------------|---------------------|-----------------------------------|-----------------------------------|-----------------------------------------------|---------------------|
| 210 nm                      |                           |                       |                     |                                   |                                   |                                               |                     |
| 020218_1PF3-PH7-413CBTNac_1 | 7:45:39 p.m.              | <b>2.82</b>           | 4179.1              | 367.7                             | 9649.2                            | 1156.3                                        | 14850.1             |
| 020218_1PF3-PH7-413CBTNac_2 | 6:54:01 a.m.              | <b>13.96</b>          | 3660.3              | 461.7                             | 9230.7                            | 3333.8                                        | 14882.8             |
| 020218_1PF3-PH7-413CBTNac_3 | 3:08:04 p.m.              | <b>22.19</b>          | 3616.8              | 680.2                             | 6993.7                            | 4871.4                                        | 9454                |
| 020218_1PF3-PH7-413CBTNac_4 | 11:22:05 p.m.             | <b>30.42</b>          | 3166.8              | 877                               | 7026.9                            | 6074.1                                        | 15707.4             |
| 020218_1PF3-PH7-413CBTNac_5 | 10:30:27 p.m.             | <b>41.56</b>          | 2262.7              | 1027.3                            | 4835.6                            | 6570.6                                        | 11867               |
| 254 nm                      |                           |                       |                     |                                   |                                   |                                               |                     |
| 020218_1PF3-PH7-413CBTNac_1 | 7:45:39 p.m.              | <b>2.82</b>           |                     | 55.9                              | 1641.7                            | 286.4                                         | 10866.8             |
| 020218_1PF3-PH7-413CBTNac_2 | 6:54:01 a.m.              | <b>13.96</b>          |                     | 105.1                             | 1616.7                            | 902                                           | 8779.7              |
| 020218_1PF3-PH7-413CBTNac_3 | 3:08:04 p.m.              | <b>22.19</b>          |                     | 152.1                             | 1291.4                            | 1378.6                                        | 4896.6              |
| 020218_1PF3-PH7-413CBTNac_4 | 11:22:05 p.m.             | <b>30.42</b>          |                     | 196                               | 1271.3                            | 1673.5                                        | 14857.8             |
| 020218_1PF3-PH7-413CBTNac_5 | 10:30:27 p.m.             | <b>41.56</b>          |                     | 190                               | 791.4                             | 1595.7                                        | 7938.7              |

| Any modification: Sum                                                                    |                                                             | Percent of total peptide with a lysine (Lysine-modified/Any modification)                                 |                                                                | Percent of total peptide that has any 13CBTNac modification ((Any modification - 1/2(CBTag 1.0-Cys-13CBTNac-Lys-13CBTNac))/All peptide) |                                                                                                                                         |
|------------------------------------------------------------------------------------------|-------------------------------------------------------------|-----------------------------------------------------------------------------------------------------------|----------------------------------------------------------------|-----------------------------------------------------------------------------------------------------------------------------------------|-----------------------------------------------------------------------------------------------------------------------------------------|
| Lysine-modified: Sum CBTag 1.0-Lys-13CBTNac and 1/2(CBTag 1.0-Cys-13CBTNac-Lys-13CBTNac) | CBTag 1.0-Lys-13CBTNac, CBTag 1.0-Cys-13CBTNac-Lys-13CBTNac | All peptide: Sum CBTag 1.0-Lys-13CBTNac, CBTag 1.0-Cys-13CBTNac, 1/2(CBTag 1.0-Cys-13CBTNac-Lys-13CBTNac) | Percent of reacted a lysine (Lysine-modified/Any modification) | Percent of total peptide with a lysine (Lysine-modified/All peptide)                                                                    | Percent of total peptide that has any 13CBTNac modification ((Any modification - 1/2(CBTag 1.0-Cys-13CBTNac-Lys-13CBTNac))/All peptide) |
| 945.85                                                                                   | 11173.2                                                     | 14774.15                                                                                                  | 8.465345649                                                    | 6.402060355                                                                                                                             | 71.71343191                                                                                                                             |
| 2128.6                                                                                   | 13026.2                                                     | 15019.6                                                                                                   | 16.34091293                                                    | 14.17214839                                                                                                                             | 75.62984367                                                                                                                             |
| 3115.9                                                                                   | 12545.3                                                     | 13726.4                                                                                                   | 24.83719002                                                    | 22.70005245                                                                                                                             | 73.65077515                                                                                                                             |
| 3914.05                                                                                  | 13978                                                       | 14107.75                                                                                                  | 28.00150236                                                    | 27.74397051                                                                                                                             | 77.55276355                                                                                                                             |
| 4312.6                                                                                   | 12433.5                                                     | 11410.9                                                                                                   | 34.68532593                                                    | 37.79368849                                                                                                                             | 80.17071397                                                                                                                             |
|                                                                                          | 9148.2                                                      | 11410.9                                                                                                   |                                                                | 37.79368849                                                                                                                             | 80.17071397                                                                                                                             |
| 199.1                                                                                    | 1984                                                        |                                                                                                           | <b>10.03528226</b>                                             |                                                                                                                                         |                                                                                                                                         |
| 556.1                                                                                    | 2623.8                                                      |                                                                                                           | <b>21.1944508</b>                                              |                                                                                                                                         |                                                                                                                                         |
| 841.4                                                                                    | 2822.1                                                      |                                                                                                           | <b>29.81467701</b>                                             |                                                                                                                                         |                                                                                                                                         |
| 1032.75                                                                                  | 3140.8                                                      |                                                                                                           | <b>32.88174987</b>                                             |                                                                                                                                         |                                                                                                                                         |
| 987.85                                                                                   | 2577.1                                                      |                                                                                                           | <b>38.33184587</b>                                             |                                                                                                                                         |                                                                                                                                         |

**Table S4.** Calculations for 4:1 CBTAg 1.0/13CBTNAC LC-MS time-course assay (two replicates). Spectra and integration results

used herein are included after Figure S13.

| 26-Jan                                                                                                                                                                                                                                                                                                                                                                                                                                                                                                                                                                                                                                                                                                                                                                                                                                                                                                                                                                                                                                                                                                                                                                                                                                                                                                                                                                                                                                                                                                                                                                                                                                                                                                                                                                                                                                                                                                                                                                                                                                                                                                                                                                                                                                                                                                                                                                                                                                                                                                                                                                                                                                                                                                                                                                                                                                                                                                                                                                                                                                                                                                                                                                                                                                                                                                                                                                                                                                                                                                                                                                                                                                                                                                                                                                                                                                                                                     |                                                                     | Time 0 = 3:18 -<br>0:05:30 =        | 3:12:30                                  |                                                                |                                                                                      |                                                                                                                                         |                     |  |                       |                  |  |  |  |  |  |  |                               |                               |  |  |  |  |  |                      |                                                                     |                                     |                                          |                                                                |                                                                                      |                                                                                                                                         |  |         |         |          |             |             |             |  |        |         |         |             |             |            |  |        |         |         |             |            |             |  |         |         |          |             |             |             |  |        |       |         |             |             |             |  |       |        |             |  |  |  |  |         |        |            |  |  |  |  |        |        |             |  |  |  |  |        |        |             |  |  |  |  |    |      |             |  |  |  |  |
|--------------------------------------------------------------------------------------------------------------------------------------------------------------------------------------------------------------------------------------------------------------------------------------------------------------------------------------------------------------------------------------------------------------------------------------------------------------------------------------------------------------------------------------------------------------------------------------------------------------------------------------------------------------------------------------------------------------------------------------------------------------------------------------------------------------------------------------------------------------------------------------------------------------------------------------------------------------------------------------------------------------------------------------------------------------------------------------------------------------------------------------------------------------------------------------------------------------------------------------------------------------------------------------------------------------------------------------------------------------------------------------------------------------------------------------------------------------------------------------------------------------------------------------------------------------------------------------------------------------------------------------------------------------------------------------------------------------------------------------------------------------------------------------------------------------------------------------------------------------------------------------------------------------------------------------------------------------------------------------------------------------------------------------------------------------------------------------------------------------------------------------------------------------------------------------------------------------------------------------------------------------------------------------------------------------------------------------------------------------------------------------------------------------------------------------------------------------------------------------------------------------------------------------------------------------------------------------------------------------------------------------------------------------------------------------------------------------------------------------------------------------------------------------------------------------------------------------------------------------------------------------------------------------------------------------------------------------------------------------------------------------------------------------------------------------------------------------------------------------------------------------------------------------------------------------------------------------------------------------------------------------------------------------------------------------------------------------------------------------------------------------------------------------------------------------------------------------------------------------------------------------------------------------------------------------------------------------------------------------------------------------------------------------------------------------------------------------------------------------------------------------------------------------------------------------------------------------------------------------------------------------------|---------------------------------------------------------------------|-------------------------------------|------------------------------------------|----------------------------------------------------------------|--------------------------------------------------------------------------------------|-----------------------------------------------------------------------------------------------------------------------------------------|---------------------|--|-----------------------|------------------|--|--|--|--|--|--|-------------------------------|-------------------------------|--|--|--|--|--|----------------------|---------------------------------------------------------------------|-------------------------------------|------------------------------------------|----------------------------------------------------------------|--------------------------------------------------------------------------------------|-----------------------------------------------------------------------------------------------------------------------------------------|--|---------|---------|----------|-------------|-------------|-------------|--|--------|---------|---------|-------------|-------------|------------|--|--------|---------|---------|-------------|------------|-------------|--|---------|---------|----------|-------------|-------------|-------------|--|--------|-------|---------|-------------|-------------|-------------|--|-------|--------|-------------|--|--|--|--|---------|--------|------------|--|--|--|--|--------|--------|-------------|--|--|--|--|--------|--------|-------------|--|--|--|--|----|------|-------------|--|--|--|--|
|                                                                                                                                                                                                                                                                                                                                                                                                                                                                                                                                                                                                                                                                                                                                                                                                                                                                                                                                                                                                                                                                                                                                                                                                                                                                                                                                                                                                                                                                                                                                                                                                                                                                                                                                                                                                                                                                                                                                                                                                                                                                                                                                                                                                                                                                                                                                                                                                                                                                                                                                                                                                                                                                                                                                                                                                                                                                                                                                                                                                                                                                                                                                                                                                                                                                                                                                                                                                                                                                                                                                                                                                                                                                                                                                                                                                                                                                                            | Time of injection in file                                           | Actual time point (h)               | CBTAg 1.0 (min 7.9)                      | CBTAg 1.0-Lys-13CBTNAC (min 8.99)                              | CBTAg 1.0-Cys-13CBTNAC (min 9.19)                                                    | CBTAg 1.0-Cys-13CBTNAC-Lys-13CBTNAC (min 9.7)                                                                                           | 13CBTNAC (min 12.9) |  |                       |                  |  |  |  |  |  |  |                               |                               |  |  |  |  |  |                      |                                                                     |                                     |                                          |                                                                |                                                                                      |                                                                                                                                         |  |         |         |          |             |             |             |  |        |         |         |             |             |            |  |        |         |         |             |            |             |  |         |         |          |             |             |             |  |        |       |         |             |             |             |  |       |        |             |  |  |  |  |         |        |            |  |  |  |  |        |        |             |  |  |  |  |        |        |             |  |  |  |  |    |      |             |  |  |  |  |
| <b>210 nm</b>                                                                                                                                                                                                                                                                                                                                                                                                                                                                                                                                                                                                                                                                                                                                                                                                                                                                                                                                                                                                                                                                                                                                                                                                                                                                                                                                                                                                                                                                                                                                                                                                                                                                                                                                                                                                                                                                                                                                                                                                                                                                                                                                                                                                                                                                                                                                                                                                                                                                                                                                                                                                                                                                                                                                                                                                                                                                                                                                                                                                                                                                                                                                                                                                                                                                                                                                                                                                                                                                                                                                                                                                                                                                                                                                                                                                                                                                              |                                                                     |                                     |                                          |                                                                |                                                                                      |                                                                                                                                         |                     |  |                       |                  |  |  |  |  |  |  |                               |                               |  |  |  |  |  |                      |                                                                     |                                     |                                          |                                                                |                                                                                      |                                                                                                                                         |  |         |         |          |             |             |             |  |        |         |         |             |             |            |  |        |         |         |             |            |             |  |         |         |          |             |             |             |  |        |       |         |             |             |             |  |       |        |             |  |  |  |  |         |        |            |  |  |  |  |        |        |             |  |  |  |  |        |        |             |  |  |  |  |    |      |             |  |  |  |  |
| 012418_4PF3-PH7-13CBTNAC_1                                                                                                                                                                                                                                                                                                                                                                                                                                                                                                                                                                                                                                                                                                                                                                                                                                                                                                                                                                                                                                                                                                                                                                                                                                                                                                                                                                                                                                                                                                                                                                                                                                                                                                                                                                                                                                                                                                                                                                                                                                                                                                                                                                                                                                                                                                                                                                                                                                                                                                                                                                                                                                                                                                                                                                                                                                                                                                                                                                                                                                                                                                                                                                                                                                                                                                                                                                                                                                                                                                                                                                                                                                                                                                                                                                                                                                                                 | 5:27:34 p.m.                                                        | 1.75                                | 18495                                    | 642.7                                                          | 18527.5                                                                              | 2025.3                                                                                                                                  | 1810.4              |  |                       |                  |  |  |  |  |  |  |                               |                               |  |  |  |  |  |                      |                                                                     |                                     |                                          |                                                                |                                                                                      |                                                                                                                                         |  |         |         |          |             |             |             |  |        |         |         |             |             |            |  |        |         |         |             |            |             |  |         |         |          |             |             |             |  |        |       |         |             |             |             |  |       |        |             |  |  |  |  |         |        |            |  |  |  |  |        |        |             |  |  |  |  |        |        |             |  |  |  |  |    |      |             |  |  |  |  |
| 012418_4PF3-PH7-13CBTNAC_2                                                                                                                                                                                                                                                                                                                                                                                                                                                                                                                                                                                                                                                                                                                                                                                                                                                                                                                                                                                                                                                                                                                                                                                                                                                                                                                                                                                                                                                                                                                                                                                                                                                                                                                                                                                                                                                                                                                                                                                                                                                                                                                                                                                                                                                                                                                                                                                                                                                                                                                                                                                                                                                                                                                                                                                                                                                                                                                                                                                                                                                                                                                                                                                                                                                                                                                                                                                                                                                                                                                                                                                                                                                                                                                                                                                                                                                                 | 5:54:47 a.m.                                                        | 14.20                               | 20626.2                                  | 2080.7                                                         | 18970.2                                                                              | 6051.6                                                                                                                                  | 1533.2              |  |                       |                  |  |  |  |  |  |  |                               |                               |  |  |  |  |  |                      |                                                                     |                                     |                                          |                                                                |                                                                                      |                                                                                                                                         |  |         |         |          |             |             |             |  |        |         |         |             |             |            |  |        |         |         |             |            |             |  |         |         |          |             |             |             |  |        |       |         |             |             |             |  |       |        |             |  |  |  |  |         |        |            |  |  |  |  |        |        |             |  |  |  |  |        |        |             |  |  |  |  |    |      |             |  |  |  |  |
| 012418_4PF3-PH7-13CBTNAC_3                                                                                                                                                                                                                                                                                                                                                                                                                                                                                                                                                                                                                                                                                                                                                                                                                                                                                                                                                                                                                                                                                                                                                                                                                                                                                                                                                                                                                                                                                                                                                                                                                                                                                                                                                                                                                                                                                                                                                                                                                                                                                                                                                                                                                                                                                                                                                                                                                                                                                                                                                                                                                                                                                                                                                                                                                                                                                                                                                                                                                                                                                                                                                                                                                                                                                                                                                                                                                                                                                                                                                                                                                                                                                                                                                                                                                                                                 | 4:08:40 p.m.                                                        | 24.43                               | 14191.8                                  | 3157.1                                                         | 12107.1                                                                              | 7429.6                                                                                                                                  | 1474.9              |  |                       |                  |  |  |  |  |  |  |                               |                               |  |  |  |  |  |                      |                                                                     |                                     |                                          |                                                                |                                                                                      |                                                                                                                                         |  |         |         |          |             |             |             |  |        |         |         |             |             |            |  |        |         |         |             |            |             |  |         |         |          |             |             |             |  |        |       |         |             |             |             |  |       |        |             |  |  |  |  |         |        |            |  |  |  |  |        |        |             |  |  |  |  |        |        |             |  |  |  |  |    |      |             |  |  |  |  |
| 012418_4PF3-PH7-13CBTNAC_4                                                                                                                                                                                                                                                                                                                                                                                                                                                                                                                                                                                                                                                                                                                                                                                                                                                                                                                                                                                                                                                                                                                                                                                                                                                                                                                                                                                                                                                                                                                                                                                                                                                                                                                                                                                                                                                                                                                                                                                                                                                                                                                                                                                                                                                                                                                                                                                                                                                                                                                                                                                                                                                                                                                                                                                                                                                                                                                                                                                                                                                                                                                                                                                                                                                                                                                                                                                                                                                                                                                                                                                                                                                                                                                                                                                                                                                                 | 12:22:42 a.m.                                                       | 32.67                               | 15650.7                                  | 3078.2                                                         | 12270.4                                                                              | 9018.7                                                                                                                                  | 1438.8              |  |                       |                  |  |  |  |  |  |  |                               |                               |  |  |  |  |  |                      |                                                                     |                                     |                                          |                                                                |                                                                                      |                                                                                                                                         |  |         |         |          |             |             |             |  |        |         |         |             |             |            |  |        |         |         |             |            |             |  |         |         |          |             |             |             |  |        |       |         |             |             |             |  |       |        |             |  |  |  |  |         |        |            |  |  |  |  |        |        |             |  |  |  |  |        |        |             |  |  |  |  |    |      |             |  |  |  |  |
| 012418_4PF3-PH7-13CBTNAC_5                                                                                                                                                                                                                                                                                                                                                                                                                                                                                                                                                                                                                                                                                                                                                                                                                                                                                                                                                                                                                                                                                                                                                                                                                                                                                                                                                                                                                                                                                                                                                                                                                                                                                                                                                                                                                                                                                                                                                                                                                                                                                                                                                                                                                                                                                                                                                                                                                                                                                                                                                                                                                                                                                                                                                                                                                                                                                                                                                                                                                                                                                                                                                                                                                                                                                                                                                                                                                                                                                                                                                                                                                                                                                                                                                                                                                                                                 | 11:30:54 a.m.                                                       | 43.80                               | 666.5                                    | 50.9                                                           | 199.5                                                                                | 196.9                                                                                                                                   | 74.8                |  |                       |                  |  |  |  |  |  |  |                               |                               |  |  |  |  |  |                      |                                                                     |                                     |                                          |                                                                |                                                                                      |                                                                                                                                         |  |         |         |          |             |             |             |  |        |         |         |             |             |            |  |        |         |         |             |            |             |  |         |         |          |             |             |             |  |        |       |         |             |             |             |  |       |        |             |  |  |  |  |         |        |            |  |  |  |  |        |        |             |  |  |  |  |        |        |             |  |  |  |  |    |      |             |  |  |  |  |
| <b>254 nm</b>                                                                                                                                                                                                                                                                                                                                                                                                                                                                                                                                                                                                                                                                                                                                                                                                                                                                                                                                                                                                                                                                                                                                                                                                                                                                                                                                                                                                                                                                                                                                                                                                                                                                                                                                                                                                                                                                                                                                                                                                                                                                                                                                                                                                                                                                                                                                                                                                                                                                                                                                                                                                                                                                                                                                                                                                                                                                                                                                                                                                                                                                                                                                                                                                                                                                                                                                                                                                                                                                                                                                                                                                                                                                                                                                                                                                                                                                              |                                                                     |                                     |                                          |                                                                |                                                                                      |                                                                                                                                         |                     |  |                       |                  |  |  |  |  |  |  |                               |                               |  |  |  |  |  |                      |                                                                     |                                     |                                          |                                                                |                                                                                      |                                                                                                                                         |  |         |         |          |             |             |             |  |        |         |         |             |             |            |  |        |         |         |             |            |             |  |         |         |          |             |             |             |  |        |       |         |             |             |             |  |       |        |             |  |  |  |  |         |        |            |  |  |  |  |        |        |             |  |  |  |  |        |        |             |  |  |  |  |    |      |             |  |  |  |  |
| 012418_4PF3-PH7-13CBTNAC_1                                                                                                                                                                                                                                                                                                                                                                                                                                                                                                                                                                                                                                                                                                                                                                                                                                                                                                                                                                                                                                                                                                                                                                                                                                                                                                                                                                                                                                                                                                                                                                                                                                                                                                                                                                                                                                                                                                                                                                                                                                                                                                                                                                                                                                                                                                                                                                                                                                                                                                                                                                                                                                                                                                                                                                                                                                                                                                                                                                                                                                                                                                                                                                                                                                                                                                                                                                                                                                                                                                                                                                                                                                                                                                                                                                                                                                                                 | 5:27:34 p.m.                                                        | 1.75                                |                                          | 109.5                                                          | 3892.3                                                                               | 554                                                                                                                                     | 767                 |  |                       |                  |  |  |  |  |  |  |                               |                               |  |  |  |  |  |                      |                                                                     |                                     |                                          |                                                                |                                                                                      |                                                                                                                                         |  |         |         |          |             |             |             |  |        |         |         |             |             |            |  |        |         |         |             |            |             |  |         |         |          |             |             |             |  |        |       |         |             |             |             |  |       |        |             |  |  |  |  |         |        |            |  |  |  |  |        |        |             |  |  |  |  |        |        |             |  |  |  |  |    |      |             |  |  |  |  |
| 012418_4PF3-PH7-13CBTNAC_2                                                                                                                                                                                                                                                                                                                                                                                                                                                                                                                                                                                                                                                                                                                                                                                                                                                                                                                                                                                                                                                                                                                                                                                                                                                                                                                                                                                                                                                                                                                                                                                                                                                                                                                                                                                                                                                                                                                                                                                                                                                                                                                                                                                                                                                                                                                                                                                                                                                                                                                                                                                                                                                                                                                                                                                                                                                                                                                                                                                                                                                                                                                                                                                                                                                                                                                                                                                                                                                                                                                                                                                                                                                                                                                                                                                                                                                                 | 5:54:47 a.m.                                                        | 14.20                               |                                          | 369.2                                                          | 3423.6                                                                               | 1544.3                                                                                                                                  | 589.1               |  |                       |                  |  |  |  |  |  |  |                               |                               |  |  |  |  |  |                      |                                                                     |                                     |                                          |                                                                |                                                                                      |                                                                                                                                         |  |         |         |          |             |             |             |  |        |         |         |             |             |            |  |        |         |         |             |            |             |  |         |         |          |             |             |             |  |        |       |         |             |             |             |  |       |        |             |  |  |  |  |         |        |            |  |  |  |  |        |        |             |  |  |  |  |        |        |             |  |  |  |  |    |      |             |  |  |  |  |
| 012418_4PF3-PH7-13CBTNAC_3                                                                                                                                                                                                                                                                                                                                                                                                                                                                                                                                                                                                                                                                                                                                                                                                                                                                                                                                                                                                                                                                                                                                                                                                                                                                                                                                                                                                                                                                                                                                                                                                                                                                                                                                                                                                                                                                                                                                                                                                                                                                                                                                                                                                                                                                                                                                                                                                                                                                                                                                                                                                                                                                                                                                                                                                                                                                                                                                                                                                                                                                                                                                                                                                                                                                                                                                                                                                                                                                                                                                                                                                                                                                                                                                                                                                                                                                 | 4:08:40 p.m.                                                        | 24.43                               |                                          | 556.6                                                          | 2360.1                                                                               | 2024.4                                                                                                                                  | 596.6               |  |                       |                  |  |  |  |  |  |  |                               |                               |  |  |  |  |  |                      |                                                                     |                                     |                                          |                                                                |                                                                                      |                                                                                                                                         |  |         |         |          |             |             |             |  |        |         |         |             |             |            |  |        |         |         |             |            |             |  |         |         |          |             |             |             |  |        |       |         |             |             |             |  |       |        |             |  |  |  |  |         |        |            |  |  |  |  |        |        |             |  |  |  |  |        |        |             |  |  |  |  |    |      |             |  |  |  |  |
| 012418_4PF3-PH7-13CBTNAC_4                                                                                                                                                                                                                                                                                                                                                                                                                                                                                                                                                                                                                                                                                                                                                                                                                                                                                                                                                                                                                                                                                                                                                                                                                                                                                                                                                                                                                                                                                                                                                                                                                                                                                                                                                                                                                                                                                                                                                                                                                                                                                                                                                                                                                                                                                                                                                                                                                                                                                                                                                                                                                                                                                                                                                                                                                                                                                                                                                                                                                                                                                                                                                                                                                                                                                                                                                                                                                                                                                                                                                                                                                                                                                                                                                                                                                                                                 | 12:22:42 a.m.                                                       | 32.67                               |                                          | 612.5                                                          | 2387.1                                                                               | 2560                                                                                                                                    | 623.7               |  |                       |                  |  |  |  |  |  |  |                               |                               |  |  |  |  |  |                      |                                                                     |                                     |                                          |                                                                |                                                                                      |                                                                                                                                         |  |         |         |          |             |             |             |  |        |         |         |             |             |            |  |        |         |         |             |            |             |  |         |         |          |             |             |             |  |        |       |         |             |             |             |  |       |        |             |  |  |  |  |         |        |            |  |  |  |  |        |        |             |  |  |  |  |        |        |             |  |  |  |  |    |      |             |  |  |  |  |
| 012418_4PF3-PH7-13CBTNAC_5                                                                                                                                                                                                                                                                                                                                                                                                                                                                                                                                                                                                                                                                                                                                                                                                                                                                                                                                                                                                                                                                                                                                                                                                                                                                                                                                                                                                                                                                                                                                                                                                                                                                                                                                                                                                                                                                                                                                                                                                                                                                                                                                                                                                                                                                                                                                                                                                                                                                                                                                                                                                                                                                                                                                                                                                                                                                                                                                                                                                                                                                                                                                                                                                                                                                                                                                                                                                                                                                                                                                                                                                                                                                                                                                                                                                                                                                 | 11:30:54 a.m.                                                       | 43.80                               |                                          | 10.7                                                           | 38.9                                                                                 | 46.6                                                                                                                                    | 33                  |  |                       |                  |  |  |  |  |  |  |                               |                               |  |  |  |  |  |                      |                                                                     |                                     |                                          |                                                                |                                                                                      |                                                                                                                                         |  |         |         |          |             |             |             |  |        |         |         |             |             |            |  |        |         |         |             |            |             |  |         |         |          |             |             |             |  |        |       |         |             |             |             |  |       |        |             |  |  |  |  |         |        |            |  |  |  |  |        |        |             |  |  |  |  |        |        |             |  |  |  |  |    |      |             |  |  |  |  |
| <table border="0" style="width:100%; border-collapse: collapse;"> <tr> <td style="width:30%;"></td> <td style="width:15%; text-align: right;">Any modification: Sum</td> <td style="width:15%; text-align: right;">All peptide: Sum</td> <td style="width:15%;"></td> <td style="width:15%;"></td> <td style="width:15%;"></td> <td style="width:15%;"></td> <td style="width:15%;"></td> </tr> <tr> <td></td> <td style="text-align: right;">CBTAg 1.0-Lys-13CBTNAC, CBTAg</td> <td style="text-align: right;">CBTAg 1.0-Lys-13CBTNAC, CBTAg</td> <td></td> <td></td> <td></td> <td></td> <td></td> </tr> <tr> <td style="text-align: right;">Lysine-modified: Sum</td> <td style="text-align: right;">CBTAg 1.0-Cys-13CBTNAC and 1/2(CBTAg 1.0-Cys-13CBTNAC-Lys-13CBTNAC)</td> <td style="text-align: right;">CBTAg 1.0-Cys-13CBTNAC-Lys-13CBTNAC</td> <td style="text-align: right;">1/2(CBTAg 1.0-Cys-13CBTNAC-Lys-13CBTNAC)</td> <td style="text-align: right;">Percent of reacted a lysine (Lysine-modified/Any modification)</td> <td style="text-align: right;">Percent of total peptide with a modification on lysine (Lysine-modified/All peptide)</td> <td colspan="2" style="text-align: right;">Percent of total peptide that has any 13CBTNAC modification ((Any modification - 1/2(CBTAg 1.0-Cys-13CBTNAC-Lys-13CBTNAC))/All peptide)</td> </tr> <tr> <td style="text-align: right;">1655.35</td> <td style="text-align: right;">21195.5</td> <td style="text-align: right;">38677.85</td> <td style="text-align: right;">7.809912481</td> <td style="text-align: right;">4.279839753</td> <td colspan="2" style="text-align: right;">52.18193359</td> </tr> <tr> <td style="text-align: right;">5106.5</td> <td style="text-align: right;">27102.5</td> <td style="text-align: right;">44702.9</td> <td style="text-align: right;">18.84143529</td> <td style="text-align: right;">11.42319626</td> <td colspan="2" style="text-align: right;">53.8593693</td> </tr> <tr> <td style="text-align: right;">6871.9</td> <td style="text-align: right;">22693.8</td> <td style="text-align: right;">33170.8</td> <td style="text-align: right;">30.28095779</td> <td style="text-align: right;">20.7167147</td> <td colspan="2" style="text-align: right;">57.21598514</td> </tr> <tr> <td style="text-align: right;">7587.55</td> <td style="text-align: right;">24367.3</td> <td style="text-align: right;">35508.65</td> <td style="text-align: right;">31.13824675</td> <td style="text-align: right;">21.36817367</td> <td colspan="2" style="text-align: right;">55.92426071</td> </tr> <tr> <td style="text-align: right;">149.35</td> <td style="text-align: right;">447.3</td> <td style="text-align: right;">1015.35</td> <td style="text-align: right;">33.38922423</td> <td style="text-align: right;">14.70921357</td> <td colspan="2" style="text-align: right;">34.35761068</td> </tr> <tr> <td style="text-align: right;">386.5</td> <td style="text-align: right;">4555.8</td> <td style="text-align: right;">8.483691119</td> <td></td> <td></td> <td colspan="2"></td> </tr> <tr> <td style="text-align: right;">1141.35</td> <td style="text-align: right;">5337.1</td> <td style="text-align: right;">21.3852092</td> <td></td> <td></td> <td colspan="2"></td> </tr> <tr> <td style="text-align: right;">1568.8</td> <td style="text-align: right;">4941.1</td> <td style="text-align: right;">31.75001518</td> <td></td> <td></td> <td colspan="2"></td> </tr> <tr> <td style="text-align: right;">1892.5</td> <td style="text-align: right;">5559.6</td> <td style="text-align: right;">34.04021872</td> <td></td> <td></td> <td colspan="2"></td> </tr> <tr> <td style="text-align: right;">34</td> <td style="text-align: right;">96.2</td> <td style="text-align: right;">35.34303534</td> <td></td> <td></td> <td colspan="2"></td> </tr> </table> |                                                                     |                                     |                                          |                                                                |                                                                                      |                                                                                                                                         |                     |  | Any modification: Sum | All peptide: Sum |  |  |  |  |  |  | CBTAg 1.0-Lys-13CBTNAC, CBTAg | CBTAg 1.0-Lys-13CBTNAC, CBTAg |  |  |  |  |  | Lysine-modified: Sum | CBTAg 1.0-Cys-13CBTNAC and 1/2(CBTAg 1.0-Cys-13CBTNAC-Lys-13CBTNAC) | CBTAg 1.0-Cys-13CBTNAC-Lys-13CBTNAC | 1/2(CBTAg 1.0-Cys-13CBTNAC-Lys-13CBTNAC) | Percent of reacted a lysine (Lysine-modified/Any modification) | Percent of total peptide with a modification on lysine (Lysine-modified/All peptide) | Percent of total peptide that has any 13CBTNAC modification ((Any modification - 1/2(CBTAg 1.0-Cys-13CBTNAC-Lys-13CBTNAC))/All peptide) |  | 1655.35 | 21195.5 | 38677.85 | 7.809912481 | 4.279839753 | 52.18193359 |  | 5106.5 | 27102.5 | 44702.9 | 18.84143529 | 11.42319626 | 53.8593693 |  | 6871.9 | 22693.8 | 33170.8 | 30.28095779 | 20.7167147 | 57.21598514 |  | 7587.55 | 24367.3 | 35508.65 | 31.13824675 | 21.36817367 | 55.92426071 |  | 149.35 | 447.3 | 1015.35 | 33.38922423 | 14.70921357 | 34.35761068 |  | 386.5 | 4555.8 | 8.483691119 |  |  |  |  | 1141.35 | 5337.1 | 21.3852092 |  |  |  |  | 1568.8 | 4941.1 | 31.75001518 |  |  |  |  | 1892.5 | 5559.6 | 34.04021872 |  |  |  |  | 34 | 96.2 | 35.34303534 |  |  |  |  |
|                                                                                                                                                                                                                                                                                                                                                                                                                                                                                                                                                                                                                                                                                                                                                                                                                                                                                                                                                                                                                                                                                                                                                                                                                                                                                                                                                                                                                                                                                                                                                                                                                                                                                                                                                                                                                                                                                                                                                                                                                                                                                                                                                                                                                                                                                                                                                                                                                                                                                                                                                                                                                                                                                                                                                                                                                                                                                                                                                                                                                                                                                                                                                                                                                                                                                                                                                                                                                                                                                                                                                                                                                                                                                                                                                                                                                                                                                            | Any modification: Sum                                               | All peptide: Sum                    |                                          |                                                                |                                                                                      |                                                                                                                                         |                     |  |                       |                  |  |  |  |  |  |  |                               |                               |  |  |  |  |  |                      |                                                                     |                                     |                                          |                                                                |                                                                                      |                                                                                                                                         |  |         |         |          |             |             |             |  |        |         |         |             |             |            |  |        |         |         |             |            |             |  |         |         |          |             |             |             |  |        |       |         |             |             |             |  |       |        |             |  |  |  |  |         |        |            |  |  |  |  |        |        |             |  |  |  |  |        |        |             |  |  |  |  |    |      |             |  |  |  |  |
|                                                                                                                                                                                                                                                                                                                                                                                                                                                                                                                                                                                                                                                                                                                                                                                                                                                                                                                                                                                                                                                                                                                                                                                                                                                                                                                                                                                                                                                                                                                                                                                                                                                                                                                                                                                                                                                                                                                                                                                                                                                                                                                                                                                                                                                                                                                                                                                                                                                                                                                                                                                                                                                                                                                                                                                                                                                                                                                                                                                                                                                                                                                                                                                                                                                                                                                                                                                                                                                                                                                                                                                                                                                                                                                                                                                                                                                                                            | CBTAg 1.0-Lys-13CBTNAC, CBTAg                                       | CBTAg 1.0-Lys-13CBTNAC, CBTAg       |                                          |                                                                |                                                                                      |                                                                                                                                         |                     |  |                       |                  |  |  |  |  |  |  |                               |                               |  |  |  |  |  |                      |                                                                     |                                     |                                          |                                                                |                                                                                      |                                                                                                                                         |  |         |         |          |             |             |             |  |        |         |         |             |             |            |  |        |         |         |             |            |             |  |         |         |          |             |             |             |  |        |       |         |             |             |             |  |       |        |             |  |  |  |  |         |        |            |  |  |  |  |        |        |             |  |  |  |  |        |        |             |  |  |  |  |    |      |             |  |  |  |  |
| Lysine-modified: Sum                                                                                                                                                                                                                                                                                                                                                                                                                                                                                                                                                                                                                                                                                                                                                                                                                                                                                                                                                                                                                                                                                                                                                                                                                                                                                                                                                                                                                                                                                                                                                                                                                                                                                                                                                                                                                                                                                                                                                                                                                                                                                                                                                                                                                                                                                                                                                                                                                                                                                                                                                                                                                                                                                                                                                                                                                                                                                                                                                                                                                                                                                                                                                                                                                                                                                                                                                                                                                                                                                                                                                                                                                                                                                                                                                                                                                                                                       | CBTAg 1.0-Cys-13CBTNAC and 1/2(CBTAg 1.0-Cys-13CBTNAC-Lys-13CBTNAC) | CBTAg 1.0-Cys-13CBTNAC-Lys-13CBTNAC | 1/2(CBTAg 1.0-Cys-13CBTNAC-Lys-13CBTNAC) | Percent of reacted a lysine (Lysine-modified/Any modification) | Percent of total peptide with a modification on lysine (Lysine-modified/All peptide) | Percent of total peptide that has any 13CBTNAC modification ((Any modification - 1/2(CBTAg 1.0-Cys-13CBTNAC-Lys-13CBTNAC))/All peptide) |                     |  |                       |                  |  |  |  |  |  |  |                               |                               |  |  |  |  |  |                      |                                                                     |                                     |                                          |                                                                |                                                                                      |                                                                                                                                         |  |         |         |          |             |             |             |  |        |         |         |             |             |            |  |        |         |         |             |            |             |  |         |         |          |             |             |             |  |        |       |         |             |             |             |  |       |        |             |  |  |  |  |         |        |            |  |  |  |  |        |        |             |  |  |  |  |        |        |             |  |  |  |  |    |      |             |  |  |  |  |
| 1655.35                                                                                                                                                                                                                                                                                                                                                                                                                                                                                                                                                                                                                                                                                                                                                                                                                                                                                                                                                                                                                                                                                                                                                                                                                                                                                                                                                                                                                                                                                                                                                                                                                                                                                                                                                                                                                                                                                                                                                                                                                                                                                                                                                                                                                                                                                                                                                                                                                                                                                                                                                                                                                                                                                                                                                                                                                                                                                                                                                                                                                                                                                                                                                                                                                                                                                                                                                                                                                                                                                                                                                                                                                                                                                                                                                                                                                                                                                    | 21195.5                                                             | 38677.85                            | 7.809912481                              | 4.279839753                                                    | 52.18193359                                                                          |                                                                                                                                         |                     |  |                       |                  |  |  |  |  |  |  |                               |                               |  |  |  |  |  |                      |                                                                     |                                     |                                          |                                                                |                                                                                      |                                                                                                                                         |  |         |         |          |             |             |             |  |        |         |         |             |             |            |  |        |         |         |             |            |             |  |         |         |          |             |             |             |  |        |       |         |             |             |             |  |       |        |             |  |  |  |  |         |        |            |  |  |  |  |        |        |             |  |  |  |  |        |        |             |  |  |  |  |    |      |             |  |  |  |  |
| 5106.5                                                                                                                                                                                                                                                                                                                                                                                                                                                                                                                                                                                                                                                                                                                                                                                                                                                                                                                                                                                                                                                                                                                                                                                                                                                                                                                                                                                                                                                                                                                                                                                                                                                                                                                                                                                                                                                                                                                                                                                                                                                                                                                                                                                                                                                                                                                                                                                                                                                                                                                                                                                                                                                                                                                                                                                                                                                                                                                                                                                                                                                                                                                                                                                                                                                                                                                                                                                                                                                                                                                                                                                                                                                                                                                                                                                                                                                                                     | 27102.5                                                             | 44702.9                             | 18.84143529                              | 11.42319626                                                    | 53.8593693                                                                           |                                                                                                                                         |                     |  |                       |                  |  |  |  |  |  |  |                               |                               |  |  |  |  |  |                      |                                                                     |                                     |                                          |                                                                |                                                                                      |                                                                                                                                         |  |         |         |          |             |             |             |  |        |         |         |             |             |            |  |        |         |         |             |            |             |  |         |         |          |             |             |             |  |        |       |         |             |             |             |  |       |        |             |  |  |  |  |         |        |            |  |  |  |  |        |        |             |  |  |  |  |        |        |             |  |  |  |  |    |      |             |  |  |  |  |
| 6871.9                                                                                                                                                                                                                                                                                                                                                                                                                                                                                                                                                                                                                                                                                                                                                                                                                                                                                                                                                                                                                                                                                                                                                                                                                                                                                                                                                                                                                                                                                                                                                                                                                                                                                                                                                                                                                                                                                                                                                                                                                                                                                                                                                                                                                                                                                                                                                                                                                                                                                                                                                                                                                                                                                                                                                                                                                                                                                                                                                                                                                                                                                                                                                                                                                                                                                                                                                                                                                                                                                                                                                                                                                                                                                                                                                                                                                                                                                     | 22693.8                                                             | 33170.8                             | 30.28095779                              | 20.7167147                                                     | 57.21598514                                                                          |                                                                                                                                         |                     |  |                       |                  |  |  |  |  |  |  |                               |                               |  |  |  |  |  |                      |                                                                     |                                     |                                          |                                                                |                                                                                      |                                                                                                                                         |  |         |         |          |             |             |             |  |        |         |         |             |             |            |  |        |         |         |             |            |             |  |         |         |          |             |             |             |  |        |       |         |             |             |             |  |       |        |             |  |  |  |  |         |        |            |  |  |  |  |        |        |             |  |  |  |  |        |        |             |  |  |  |  |    |      |             |  |  |  |  |
| 7587.55                                                                                                                                                                                                                                                                                                                                                                                                                                                                                                                                                                                                                                                                                                                                                                                                                                                                                                                                                                                                                                                                                                                                                                                                                                                                                                                                                                                                                                                                                                                                                                                                                                                                                                                                                                                                                                                                                                                                                                                                                                                                                                                                                                                                                                                                                                                                                                                                                                                                                                                                                                                                                                                                                                                                                                                                                                                                                                                                                                                                                                                                                                                                                                                                                                                                                                                                                                                                                                                                                                                                                                                                                                                                                                                                                                                                                                                                                    | 24367.3                                                             | 35508.65                            | 31.13824675                              | 21.36817367                                                    | 55.92426071                                                                          |                                                                                                                                         |                     |  |                       |                  |  |  |  |  |  |  |                               |                               |  |  |  |  |  |                      |                                                                     |                                     |                                          |                                                                |                                                                                      |                                                                                                                                         |  |         |         |          |             |             |             |  |        |         |         |             |             |            |  |        |         |         |             |            |             |  |         |         |          |             |             |             |  |        |       |         |             |             |             |  |       |        |             |  |  |  |  |         |        |            |  |  |  |  |        |        |             |  |  |  |  |        |        |             |  |  |  |  |    |      |             |  |  |  |  |
| 149.35                                                                                                                                                                                                                                                                                                                                                                                                                                                                                                                                                                                                                                                                                                                                                                                                                                                                                                                                                                                                                                                                                                                                                                                                                                                                                                                                                                                                                                                                                                                                                                                                                                                                                                                                                                                                                                                                                                                                                                                                                                                                                                                                                                                                                                                                                                                                                                                                                                                                                                                                                                                                                                                                                                                                                                                                                                                                                                                                                                                                                                                                                                                                                                                                                                                                                                                                                                                                                                                                                                                                                                                                                                                                                                                                                                                                                                                                                     | 447.3                                                               | 1015.35                             | 33.38922423                              | 14.70921357                                                    | 34.35761068                                                                          |                                                                                                                                         |                     |  |                       |                  |  |  |  |  |  |  |                               |                               |  |  |  |  |  |                      |                                                                     |                                     |                                          |                                                                |                                                                                      |                                                                                                                                         |  |         |         |          |             |             |             |  |        |         |         |             |             |            |  |        |         |         |             |            |             |  |         |         |          |             |             |             |  |        |       |         |             |             |             |  |       |        |             |  |  |  |  |         |        |            |  |  |  |  |        |        |             |  |  |  |  |        |        |             |  |  |  |  |    |      |             |  |  |  |  |
| 386.5                                                                                                                                                                                                                                                                                                                                                                                                                                                                                                                                                                                                                                                                                                                                                                                                                                                                                                                                                                                                                                                                                                                                                                                                                                                                                                                                                                                                                                                                                                                                                                                                                                                                                                                                                                                                                                                                                                                                                                                                                                                                                                                                                                                                                                                                                                                                                                                                                                                                                                                                                                                                                                                                                                                                                                                                                                                                                                                                                                                                                                                                                                                                                                                                                                                                                                                                                                                                                                                                                                                                                                                                                                                                                                                                                                                                                                                                                      | 4555.8                                                              | 8.483691119                         |                                          |                                                                |                                                                                      |                                                                                                                                         |                     |  |                       |                  |  |  |  |  |  |  |                               |                               |  |  |  |  |  |                      |                                                                     |                                     |                                          |                                                                |                                                                                      |                                                                                                                                         |  |         |         |          |             |             |             |  |        |         |         |             |             |            |  |        |         |         |             |            |             |  |         |         |          |             |             |             |  |        |       |         |             |             |             |  |       |        |             |  |  |  |  |         |        |            |  |  |  |  |        |        |             |  |  |  |  |        |        |             |  |  |  |  |    |      |             |  |  |  |  |
| 1141.35                                                                                                                                                                                                                                                                                                                                                                                                                                                                                                                                                                                                                                                                                                                                                                                                                                                                                                                                                                                                                                                                                                                                                                                                                                                                                                                                                                                                                                                                                                                                                                                                                                                                                                                                                                                                                                                                                                                                                                                                                                                                                                                                                                                                                                                                                                                                                                                                                                                                                                                                                                                                                                                                                                                                                                                                                                                                                                                                                                                                                                                                                                                                                                                                                                                                                                                                                                                                                                                                                                                                                                                                                                                                                                                                                                                                                                                                                    | 5337.1                                                              | 21.3852092                          |                                          |                                                                |                                                                                      |                                                                                                                                         |                     |  |                       |                  |  |  |  |  |  |  |                               |                               |  |  |  |  |  |                      |                                                                     |                                     |                                          |                                                                |                                                                                      |                                                                                                                                         |  |         |         |          |             |             |             |  |        |         |         |             |             |            |  |        |         |         |             |            |             |  |         |         |          |             |             |             |  |        |       |         |             |             |             |  |       |        |             |  |  |  |  |         |        |            |  |  |  |  |        |        |             |  |  |  |  |        |        |             |  |  |  |  |    |      |             |  |  |  |  |
| 1568.8                                                                                                                                                                                                                                                                                                                                                                                                                                                                                                                                                                                                                                                                                                                                                                                                                                                                                                                                                                                                                                                                                                                                                                                                                                                                                                                                                                                                                                                                                                                                                                                                                                                                                                                                                                                                                                                                                                                                                                                                                                                                                                                                                                                                                                                                                                                                                                                                                                                                                                                                                                                                                                                                                                                                                                                                                                                                                                                                                                                                                                                                                                                                                                                                                                                                                                                                                                                                                                                                                                                                                                                                                                                                                                                                                                                                                                                                                     | 4941.1                                                              | 31.75001518                         |                                          |                                                                |                                                                                      |                                                                                                                                         |                     |  |                       |                  |  |  |  |  |  |  |                               |                               |  |  |  |  |  |                      |                                                                     |                                     |                                          |                                                                |                                                                                      |                                                                                                                                         |  |         |         |          |             |             |             |  |        |         |         |             |             |            |  |        |         |         |             |            |             |  |         |         |          |             |             |             |  |        |       |         |             |             |             |  |       |        |             |  |  |  |  |         |        |            |  |  |  |  |        |        |             |  |  |  |  |        |        |             |  |  |  |  |    |      |             |  |  |  |  |
| 1892.5                                                                                                                                                                                                                                                                                                                                                                                                                                                                                                                                                                                                                                                                                                                                                                                                                                                                                                                                                                                                                                                                                                                                                                                                                                                                                                                                                                                                                                                                                                                                                                                                                                                                                                                                                                                                                                                                                                                                                                                                                                                                                                                                                                                                                                                                                                                                                                                                                                                                                                                                                                                                                                                                                                                                                                                                                                                                                                                                                                                                                                                                                                                                                                                                                                                                                                                                                                                                                                                                                                                                                                                                                                                                                                                                                                                                                                                                                     | 5559.6                                                              | 34.04021872                         |                                          |                                                                |                                                                                      |                                                                                                                                         |                     |  |                       |                  |  |  |  |  |  |  |                               |                               |  |  |  |  |  |                      |                                                                     |                                     |                                          |                                                                |                                                                                      |                                                                                                                                         |  |         |         |          |             |             |             |  |        |         |         |             |             |            |  |        |         |         |             |            |             |  |         |         |          |             |             |             |  |        |       |         |             |             |             |  |       |        |             |  |  |  |  |         |        |            |  |  |  |  |        |        |             |  |  |  |  |        |        |             |  |  |  |  |    |      |             |  |  |  |  |
| 34                                                                                                                                                                                                                                                                                                                                                                                                                                                                                                                                                                                                                                                                                                                                                                                                                                                                                                                                                                                                                                                                                                                                                                                                                                                                                                                                                                                                                                                                                                                                                                                                                                                                                                                                                                                                                                                                                                                                                                                                                                                                                                                                                                                                                                                                                                                                                                                                                                                                                                                                                                                                                                                                                                                                                                                                                                                                                                                                                                                                                                                                                                                                                                                                                                                                                                                                                                                                                                                                                                                                                                                                                                                                                                                                                                                                                                                                                         | 96.2                                                                | 35.34303534                         |                                          |                                                                |                                                                                      |                                                                                                                                         |                     |  |                       |                  |  |  |  |  |  |  |                               |                               |  |  |  |  |  |                      |                                                                     |                                     |                                          |                                                                |                                                                                      |                                                                                                                                         |  |         |         |          |             |             |             |  |        |         |         |             |             |            |  |        |         |         |             |            |             |  |         |         |          |             |             |             |  |        |       |         |             |             |             |  |       |        |             |  |  |  |  |         |        |            |  |  |  |  |        |        |             |  |  |  |  |        |        |             |  |  |  |  |    |      |             |  |  |  |  |

2-Feb Time 0 = 5:02 -  
0:05:30 = 4:56:30

|                            | Time of injection in file | Actual time point (h) | CBTag 1.0 (min 7.9) | CBTag 1.0-Lys-13CBTNAc (min 8.99) | CBTag 1.0-Cys-13CBTNAc (min 9.19) | CBTag 1.0-Cys-13CBTNAc-Lys-13CBTNAc (min 9.7) | 13CBTNAc (min 12.9) |
|----------------------------|---------------------------|-----------------------|---------------------|-----------------------------------|-----------------------------------|-----------------------------------------------|---------------------|
| <b>210 nm</b>              |                           |                       |                     |                                   |                                   |                                               |                     |
| 020218_4PF3-PH7-13CBTNAc_1 | 7:16:34 p.m.              | 2.33                  | 17726.9             | 919.9                             | 17143.3                           | 2137.4                                        | 1670                |
| 020218_4PF3-PH7-13CBTNAc_2 | 6:24:55 a.m.              | 13.47                 | 20687.5             | 2669.5                            | 17836.4                           | 5985.9                                        | 1109.5              |
| 020218_4PF3-PH7-13CBTNAc_3 | 2:38:58 p.m.              | 21.71                 | 15967.8             | 4050.5                            | 12346.2                           | 7415                                          | 1010.4              |
| 020218_4PF3-PH7-13CBTNAc_4 | 10:52:58 p.m.             | 29.94                 | 16438.6             | 4837.6                            | 11770.2                           | 8735.1                                        | 863.5               |
| 020218_4PF3-PH7-13CBTNAc_5 | 10:01:22 a.m.             | 41.08                 | 13302.2             | 4184.8                            | 10201                             | 8778.2                                        | 998.1               |
| <b>254 nm</b>              |                           |                       |                     |                                   |                                   |                                               |                     |
| 020218_4PF3-PH7-13CBTNAc_1 | 7:16:34 p.m.              | 2.33                  |                     | 200.3                             | 4234.3                            | 737                                           | 729.3               |
| 020218_4PF3-PH7-13CBTNAc_2 | 6:24:55 a.m.              | 13.47                 |                     | 572.6                             | 3598.4                            | 1752.5                                        | 474.2               |
| 020218_4PF3-PH7-13CBTNAc_3 | 2:38:58 p.m.              | 21.71                 |                     | 871.5                             | 2728.3                            | 2236.7                                        | 454                 |
| 020218_4PF3-PH7-13CBTNAc_4 | 10:52:58 p.m.             | 29.94                 |                     | 1078.5                            | 2427.3                            | 2653.7                                        | 379.6               |
| 020218_4PF3-PH7-13CBTNAc_5 | 10:01:22 a.m.             | 41.08                 |                     | 886.4                             | 1947.9                            | 2469.6                                        | 429.6               |

|                                                                                          | Any modification: Sum<br>CBTag 1.0-Lys-13CBTNAc, CBTag 1.0-Cys-13CBTNAc, CBTag 1.0-Cys-13CBTNAc-Lys-13CBTNAc | All peptide: Sum<br>CBTag 1.0-Lys-13CBTNAc, CBTag 1.0-Cys-13CBTNAc, 1/2(CBTag 1.0-Cys-13CBTNAc-Lys-13CBTNAc) | Percent of reacted<br>13CBTNAc bound to a lysine (Lysine-modified/Any modification) | Percent of total peptide with a modification on lysine (Lysine-modified/All peptide) | Percent of total peptide that has any 13CBTNAc modification ((Any modification - 1/2(CBTag 1.0-Cys-13CBTNAc-Lys-13CBTNAc))/All peptide) |
|------------------------------------------------------------------------------------------|--------------------------------------------------------------------------------------------------------------|--------------------------------------------------------------------------------------------------------------|-------------------------------------------------------------------------------------|--------------------------------------------------------------------------------------|-----------------------------------------------------------------------------------------------------------------------------------------|
| Lysine-modified: Sum CBTag 1.0-Lys-13CBTNAc and 1/2(CBTag 1.0-Cys-13CBTNAc-Lys-13CBTNAc) | 1988.6<br>5662.45<br>7758<br>9205.15<br>8573.9                                                               | 20200.6<br>26491.8<br>23811.7<br>25342.9<br>23164                                                            | 36858.8<br>44186.35<br>36072<br>37413.95<br>32077.1                                 | 9.844262052<br>21.3743498<br>32.58062213<br>36.32240194<br>37.01390088               | 5.395183782<br>12.8149304<br>21.50698603<br>24.60352355<br>26.72903723                                                                  |
|                                                                                          | 568.8<br>1448.85<br>1989.85<br>2405.35<br>2121.2                                                             | 5171.6<br>5923.5<br>5836.5<br>6159.5<br>5303.9                                                               |                                                                                     | 10.99853044<br>24.4593568<br>34.09320655<br>39.05105934<br>39.99321254               |                                                                                                                                         |



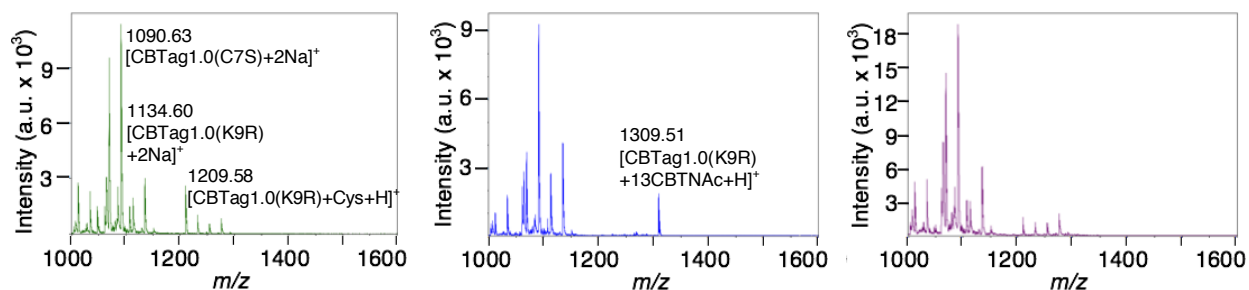

**Figure S12.** 13CBTNAC binding assay and cysteine treatment results for a 1:1 mixture of CBTag 1.0 (K9R) and CBTag 1.0 (C7S). The binding assay and cysteine competition were as follows: 40  $\mu$ L of a 10% DMF in PBS solution of 1:1 CBTag 1.0 (K9R)/CBTag 1.0 (C7S) (0.9 mM total peptide) with or without 13CBTNAC (1 mM) was incubated 48 h at r.t. Then, the negative control (without 13CBTNAC) and half (20  $\mu$ L) of the sample incubated with 13CBTNAC were each treated with an equal volume (20  $\mu$ L) of a solution of cysteine and DTT (10 and 15 mM, respectively) in PBS. The other half of the sample incubated with 13CBTNAC was treated with an equal volume of a solution of DTT (15 mM) in PBS. After 48 h at r.t., MALDI-TOF MS was used to analyze the negative control (left column, green spectra), the sample incubated with 13CBTNAC then DTT alone (middle column, blue spectra), and the sample incubated with 13CBTNAC then cysteine and DTT (right column, purple spectra). The CBTag 1.0 (K9R)-13CBTNAC adduct disappears on cysteine treatment; no CBTag 1.0 (C7S)-13CBTNAC adduct is apparent under any of these conditions.

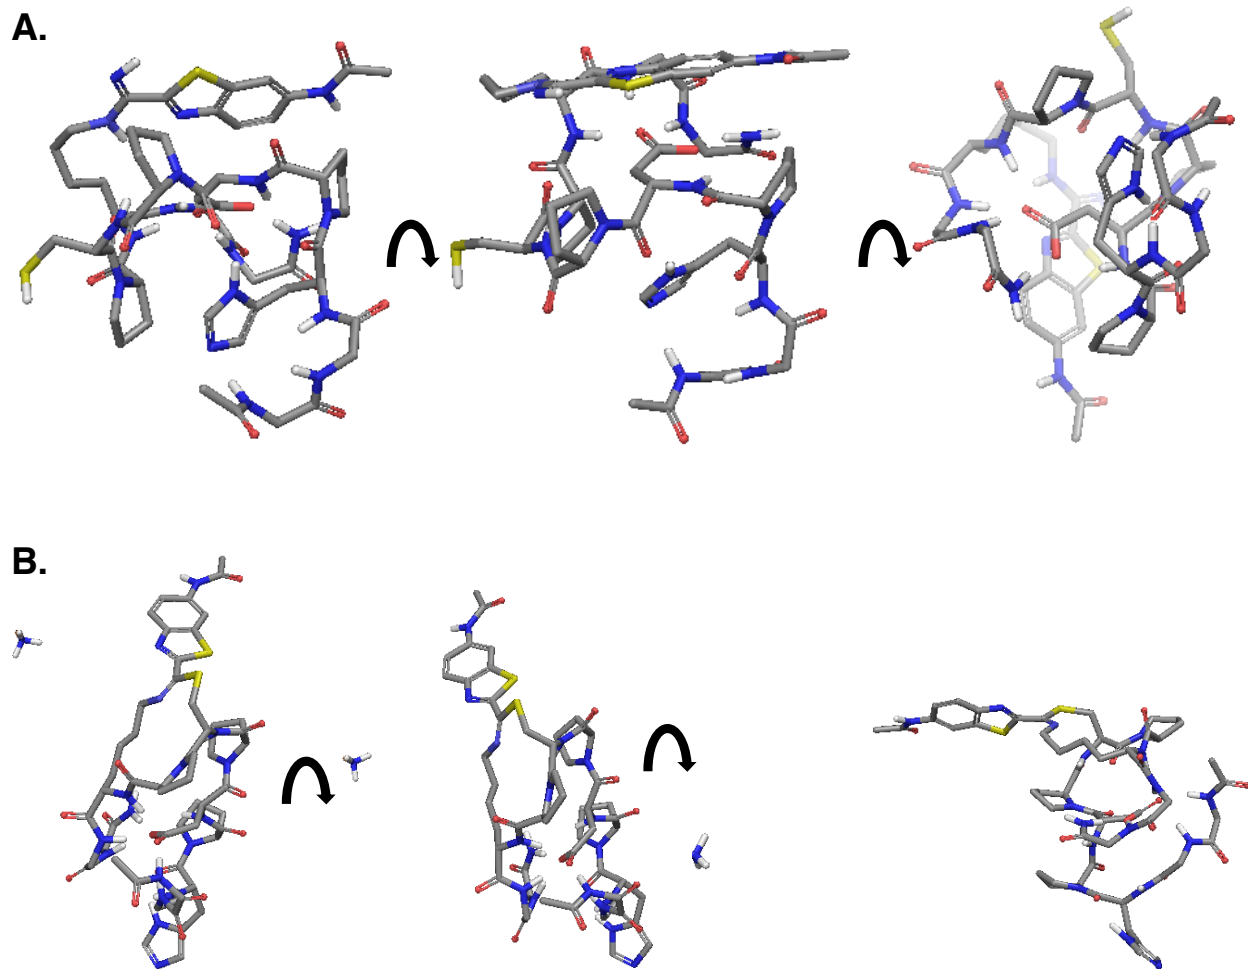

**Figure S13.** Lowest energy conformation of each potential final product (Maestro, Macromodel).

**A.** Rotated views of the amidine product (observed). The energy of this conformer was found to be -488 kcal/mol. **B.** Rotated views of the condensation reaction product, including ammonia (not observed). The energy of this conformer was found to be -456 kcal/mol.

## **LC-MS time-course spectra and integration results**

Peak identification based on Figures S6-7:

CBTag 1.0 – minute 7.9

CBTag 1.0-13CBTNAc, lysine adduct – minute 9

CBTag 1.0-13CBTNAc, cysteine adduct – minute 9.2

CBTag 1.0-2(13CBTNAc) – minute 9.7

13CBTNAc – minute 12.9

Integration results were consolidated previously in Tables S2-S4

Print of window 38: Current Chromatogram(s)  
 Data File : C:\CHEM32\1\DATA\2018 TO MAR 07\012618\012418\_PF3-PH7-13CBTNAC\_1.D  
 Sample Name : 012218\_PF3-ph7-13cbtnac\_1

=====  
 Acq. Operator : SGLK Seq. Line : 5  
 Acq. Instrument : Instrument 1 Location : Vial 5  
 Injection Date : 1/26/18 4:58:31 PM Inj : 1  
 Inj Volume : 1.000 µl

Acq. Method : D:\CHEM32\1\METHODS\AP\_C18\_INSERT.M  
 Last changed : 1/22/18 3:04:38 PM by SGLK  
 Analysis Method : Z:\DESKTOP\BERTOZZI LAB\LCMS INFO\LCMS METHODS TO 112917\SGLK\_BERTOZZI\_BP\_WITHINSERT.M  
 Last changed : 3/8/18 8:51:08 AM  
 (modified after loading)  
 Additional Info : Peak(s) manually integrated

Current Chromatogram(s)

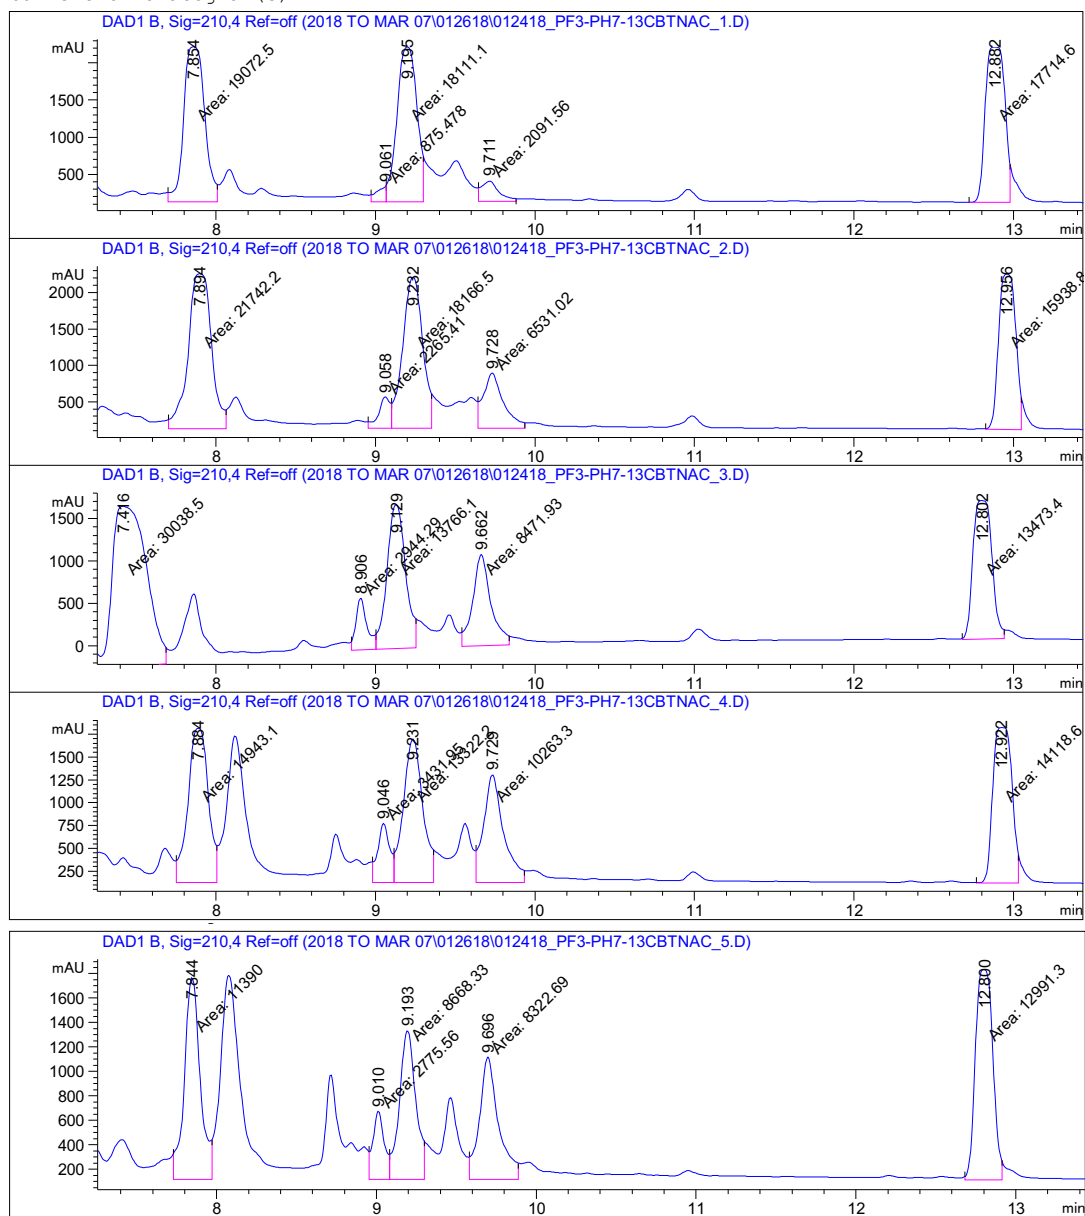

Data File C:\CHEM32\1\DATA\2018 TO MAR 07\012618\012418\_PF3-PH7-13CBTNAC\_1.D  
Sample Name: 012218\_PF3-ph7-13cbtnac\_1

=====  
Integration Results  
=====

Signal 1: DAD1 B, Sig=210,4 Ref=off (2018 TO MAR 07\012618\012418\_PF3-PH7-13CBTNAC\_1.D)

| Peak # | Time [min] | Type | Area [mAU*s] | Height [mAU] | Width [min] | Start [min] | End [min] |
|--------|------------|------|--------------|--------------|-------------|-------------|-----------|
| 1      | 7.854      | FM   | 1.90725e4    | 2084.91626   | 0.1525      | 7.697       | 8.004     |
| 2      | 9.061      | MF   | 875.47845    | 209.35365    | 0.0697      | 8.970       | 9.065     |
| 3      | 9.195      | MF   | 1.81111e4    | 2078.43286   | 0.1452      | 9.065       | 9.298     |
| 4      | 9.711      | FM   | 2091.56250   | 275.67270    | 0.1265      | 9.644       | 9.877     |
| 5      | 12.882     | MF   | 1.77146e4    | 2086.62402   | 0.1415      | 12.720      | 12.976    |

Signal 2: DAD1 B, Sig=210,4 Ref=off (2018 TO MAR 07\012618\012418\_PF3-PH7-13CBTNAC\_2.D)

| Peak # | Time [min] | Type | Area [mAU*s] | Height [mAU] | Width [min] | Start [min] | End [min] |
|--------|------------|------|--------------|--------------|-------------|-------------|-----------|
| 1      | 7.894      | FM   | 2.17422e4    | 2129.17847   | 0.1702      | 7.699       | 8.060     |
| 2      | 9.058      | FM   | 2265.41406   | 433.72296    | 0.0871      | 8.952       | 9.098     |
| 3      | 9.232      | MF   | 1.81665e4    | 2077.62915   | 0.1457      | 9.098       | 9.349     |
| 4      | 9.728      | FM   | 6531.01660   | 759.14935    | 0.1434      | 9.640       | 9.934     |
| 5      | 12.956     | MF   | 1.59388e4    | 2136.41089   | 0.1243      | 12.824      | 13.046    |

Signal 3: DAD1 B, Sig=210,4 Ref=off (2018 TO MAR 07\012618\012418\_PF3-PH7-13CBTNAC\_3.D)

| Peak # | Time [min] | Type | Area [mAU*s] | Height [mAU] | Width [min] | Start [min] | End [min] |
|--------|------------|------|--------------|--------------|-------------|-------------|-----------|
| 1      | 7.416      | FM   | 3.00385e4    | 1894.61292   | 0.2642      | 7.077       | 7.685     |
| 2      | 8.906      | MF   | 2944.28687   | 611.75421    | 0.0802      | 8.846       | 8.999     |
| 3      | 9.129      | MF   | 1.37661e4    | 1695.87073   | 0.1353      | 8.999       | 9.250     |
| 4      | 9.662      | MF   | 8471.92676   | 1076.19922   | 0.1312      | 9.538       | 9.835     |
| 5      | 12.802     | MF   | 1.34734e4    | 1632.25354   | 0.1376      | 12.676      | 12.937    |

Signal 4: DAD1 B, Sig=210,4 Ref=off (2018 TO MAR 07\012618\012418\_PF3-PH7-13CBTNAC\_4.D)

| Peak # | Time [min] | Type | Area [mAU*s] | Height [mAU] | Width [min] | Start [min] | End [min] |
|--------|------------|------|--------------|--------------|-------------|-------------|-----------|
| 1      | 7.884      | MF   | 1.49431e4    | 1688.32275   | 0.1475      | 7.747       | 8.001     |
| 2      | 9.010      | FM   | 3431.95166   | 649.64691    | 0.0880      | 8.979       | 9.113     |
| 3      | 9.231      | FM   | 1.33222e4    | 1571.53259   | 0.1413      | 9.113       | 9.360     |
| 4      | 9.729      | FM   | 1.02633e4    | 1182.65515   | 0.1446      | 9.627       | 9.932     |
| 5      | 12.922     | MF   | 1.41186e4    | 1700.74683   | 0.1384      | 12.764      | 13.027    |

Signal 5: DAD1 B, Sig=210,4 Ref=off (2018 TO MAR 07\012618\012418\_PF3-PH7-13CBTNAC\_5.D)

| Peak # | Time [min] | Type | Area [mAU*s] | Height [mAU] | Width [min] | Start [min] | End [min] |
|--------|------------|------|--------------|--------------|-------------|-------------|-----------|
| 1      | 7.844      | MF   | 1.13900e4    | 1649.19177   | 0.1151      | 7.726       | 7.969     |
| 2      | 9.010      | MF   | 2775.56274   | 557.69238    | 0.0829      | 8.951       | 9.081     |
| 3      | 9.193      | MF   | 8668.32715   | 1219.24573   | 0.1185      | 9.081       | 9.297     |
| 4      | 9.696      | MF   | 8322.69238   | 1001.90900   | 0.1384      | 9.578       | 9.886     |
| 5      | 12.800     | MF   | 1.29913e4    | 1721.24487   | 0.1258      | 12.678      | 12.910    |



Data File C:\CHEM32\1\DATA\2018 TO MAR 07\012618\012418\_PF3-PH7-13CBTNAC\_1.D  
Sample Name: 012218\_PF3-ph7-13cbtnac\_1

=====  
Integration Results  
=====

Signal 1: DAD1 A, Sig=254,4 Ref=off (2018 TO MAR 07\012618\012418\_PF3-PH7-13CBTNAC\_1.D)

| Peak # | Time [min] | Type | Area [mAU*s] | Height [mAU] | Width [min] | Start [min] | End [min] |
|--------|------------|------|--------------|--------------|-------------|-------------|-----------|
| 1      | 9.081      | MF   | 455.95853    | 76.43199     | 0.0994      | 8.948       | 9.085     |
| 2      | 9.195      | MF   | 4273.00830   | 647.51642    | 0.1100      | 9.085       | 9.285     |
| 3      | 9.713      | FM   | 864.22162    | 103.05989    | 0.1398      | 9.631       | 9.836     |
| 4      | 12.880     | MF   | 1.54454e4    | 2768.33911   | 0.0930      | 12.757      | 12.973    |
| 5      | 12.973     | FM   | 383.86099    | 201.20613    | 0.0318      | 12.973      | 13.073    |

Signal 2: DAD1 A, Sig=254,4 Ref=off (2018 TO MAR 07\012618\012418\_PF3-PH7-13CBTNAC\_2.D)

| Peak # | Time [min] | Type | Area [mAU*s] | Height [mAU] | Width [min] | Start [min] | End [min] |
|--------|------------|------|--------------|--------------|-------------|-------------|-----------|
| 1      | 9.057      | MF   | 416.94113    | 78.41770     | 0.0886      | 8.983       | 9.115     |
| 2      | 9.232      | MF   | 3347.27686   | 497.54984    | 0.1121      | 9.115       | 9.320     |
| 3      | 9.728      | MF   | 1268.26978   | 193.05396    | 0.1095      | 9.657       | 9.807     |
| 4      | 12.956     | MM   | 1.15061e4    | 2109.27319   | 0.0909      | 12.842      | 13.088    |

Signal 3: DAD1 A, Sig=254,4 Ref=off (2018 TO MAR 07\012618\012418\_PF3-PH7-13CBTNAC\_3.D)

| Peak # | Time [min] | Type | Area [mAU*s] | Height [mAU] | Width [min] | Start [min] | End [min] |
|--------|------------|------|--------------|--------------|-------------|-------------|-----------|
| 1      | 8.906      | MF   | 851.79407    | 162.02739    | 0.0876      | 8.852       | 8.984     |
| 2      | 9.129      | FM   | 3439.48486   | 476.80533    | 0.1202      | 8.984       | 9.230     |
| 3      | 9.662      | FM   | 2666.17871   | 344.44800    | 0.1290      | 9.541       | 9.762     |
| 4      | 12.803     | MM   | 1.12936e4    | 2014.62061   | 0.0934      | 12.677      | 12.918    |

Signal 4: DAD1 A, Sig=254,4 Ref=off (2018 TO MAR 07\012618\012418\_PF3-PH7-13CBTNAC\_4.D)

| Peak # | Time [min] | Type | Area [mAU*s] | Height [mAU] | Width [min] | Start [min] | End [min] |
|--------|------------|------|--------------|--------------|-------------|-------------|-----------|
| 1      | 9.046      | MF   | 906.43396    | 164.82642    | 0.0917      | 8.992       | 9.120     |
| 2      | 9.231      | MF   | 2879.00098   | 392.18085    | 0.1224      | 9.120       | 9.325     |
| 3      | 9.730      | MF   | 2489.67114   | 360.50821    | 0.1151      | 9.647       | 9.817     |
| 4      | 12.924     | MM   | 1.27247e4    | 2235.55273   | 0.0949      | 12.818      | 13.074    |

Signal 5: DAD1 A, Sig=254,4 Ref=off (2018 TO MAR 07\012618\012418\_PF3-PH7-13CBTNAC\_5.D)

| Peak # | Time [min] | Type | Area [mAU*s] | Height [mAU] | Width [min] | Start [min] | End [min] |
|--------|------------|------|--------------|--------------|-------------|-------------|-----------|
| 1      | 9.011      | MF   | 638.57806    | 124.45227    | 0.0855      | 8.962       | 9.095     |
| 2      | 9.193      | FM   | 1658.48438   | 245.42241    | 0.1126      | 9.095       | 9.280     |
| 3      | 9.696      | FM   | 2168.59033   | 286.15845    | 0.1263      | 9.591       | 9.827     |
| 4      | 12.800     | MM   | 9266.77344   | 1678.98987   | 0.0920      | 12.687      | 12.978    |





Data File C:\CHEM32\1\DATA\2018 TO MAR 07\020218\013118\_Pf3-PH7-13CBTNAC\_1.D  
Sample Name: 013118\_Pf3-ph7-13cbtnac\_1

=====  
Integration Results  
=====

Signal 1: DAD1 B, Sig=210,4 Ref=off (2018 TO MAR 07\020218\013118\_Pf3-PH7-13CBTNAC\_1.D)

| Peak # | Time [min] | Type | Area [mAU*s] | Height [mAU] | Width [min] | Start [min] | End [min] |
|--------|------------|------|--------------|--------------|-------------|-------------|-----------|
| 1      | 7.806      | MF   | 1.47586e4    | 1877.88623   | 0.1310      | 7.677       | 7.947     |
| 2      | 9.011      | MF   | 667.71442    | 192.94965    | 0.0577      | 8.939       | 9.012     |
| 3      | 9.169      | MF   | 2.01643e4    | 1890.88965   | 0.1777      | 9.012       | 9.273     |
| 4      | 9.686      | FM   | 2894.87231   | 414.46405    | 0.1164      | 9.622       | 9.956     |
| 5      | 12.862     | MF   | 8795.91797   | 1592.83997   | 0.0920      | 12.740      | 12.963    |

Signal 2: DAD1 B, Sig=210,4 Ref=off (2018 TO MAR 07\020218\013118\_Pf3-PH7-13CBTNAC\_2.D)

| Peak # | Time [min] | Type | Area [mAU*s] | Height [mAU] | Width [min] | Start [min] | End [min] |
|--------|------------|------|--------------|--------------|-------------|-------------|-----------|
| 1      | 7.843      | FM   | 1.54074e4    | 2173.26514   | 0.1182      | 7.740       | 7.976     |
| 2      | 9.014      | MF   | 1732.66248   | 402.80444    | 0.0717      | 8.955       | 9.044     |
| 3      | 9.175      | MF   | 2.40263e4    | 2183.97681   | 0.1834      | 9.044       | 9.314     |
| 4      | 9.695      | MF   | 1.18598e4    | 1464.29858   | 0.1350      | 9.603       | 9.883     |
| 5      | 12.916     | MF   | 1.13144e4    | 2036.28650   | 0.0926      | 12.788      | 13.007    |

Signal 3: DAD1 B, Sig=210,4 Ref=off (2018 TO MAR 07\020218\013118\_Pf3-PH7-13CBTNAC\_3.D)

| Peak # | Time [min] | Type | Area [mAU*s] | Height [mAU] | Width [min] | Start [min] | End [min] |
|--------|------------|------|--------------|--------------|-------------|-------------|-----------|
| 1      | 7.781      | MF   | 1.16208e4    | 1624.52429   | 0.1192      | 7.661       | 7.925     |
| 2      | 8.956      | MF   | 2901.13184   | 622.10889    | 0.0777      | 8.891       | 9.015     |
| 3      | 9.128      | MF   | 1.64453e4    | 1625.91223   | 0.1686      | 9.015       | 9.254     |
| 4      | 9.651      | MF   | 1.50107e4    | 1571.71680   | 0.1592      | 9.536       | 9.845     |
| 5      | 12.764     | MF   | 9674.14648   | 1609.95398   | 0.1001      | 12.623      | 12.868    |

Signal 4: DAD1 B, Sig=210,4 Ref=off (2018 TO MAR 07\020218\013118\_Pf3-PH7-13CBTNAC\_4.D)

| Peak # | Time [min] | Type | Area [mAU*s] | Height [mAU] | Width [min] | Start [min] | End [min] |
|--------|------------|------|--------------|--------------|-------------|-------------|-----------|
| 1      | 7.826      | FM   | 1.18658e4    | 1681.22424   | 0.1176      | 7.712       | 7.941     |
| 2      | 8.990      | MF   | 3692.21680   | 820.23694    | 0.0750      | 8.929       | 9.047     |
| 3      | 9.171      | MF   | 1.73316e4    | 1636.02942   | 0.1766      | 9.047       | 9.292     |
| 4      | 9.685      | MF   | 1.68454e4    | 1617.40186   | 0.1736      | 9.587       | 9.896     |
| 5      | 12.862     | MF   | 4868.47998   | 934.37787    | 0.0868      | 12.734      | 12.947    |

Signal 5: DAD1 B, Sig=210,4 Ref=off (2018 TO MAR 07\020218\013118\_Pf3-PH7-13CBTNAC\_5.D)

| Peak # | Time [min] | Type | Area [mAU*s] | Height [mAU] | Width [min] | Start [min] | End [min] |
|--------|------------|------|--------------|--------------|-------------|-------------|-----------|
| 1      | 7.804      | FM   | 8382.09668   | 1519.23242   | 0.0920      | 7.725       | 7.928     |
| 2      | 8.959      | MF   | 3265.69629   | 730.16943    | 0.0745      | 8.901       | 9.028     |
| 3      | 9.149      | MF   | 1.26039e4    | 1678.56458   | 0.1251      | 9.028       | 9.219     |
| 4      | 9.658      | MF   | 1.34339e4    | 1646.90576   | 0.1360      | 9.559       | 9.769     |
| 5      | 12.782     | MF   | 4078.51001   | 775.32263    | 0.0877      | 12.664      | 12.883    |

Print of window 38: Current Chromatogram(s)

Data File : C:\CHEM32\1\DATA\2018 TO MAR 07\020218\013118\_PF3-PH7-13CBTNAC\_1.D

Sample Name : 013118\_PF3-ph7-13cbtnac\_1

=====  
Acq. Operator : SGLK Seq. Line : 5  
Acq. Instrument : Instrument 1 Location : Vial 5  
Injection Date : 2/2/18 6:47:32 PM Inj : 1  
Inj Volume : 1.000 µl

Acq. Method : D:\CHEM32\1\METHODS\AP\_C18\_INSERT.M  
Last changed : 1/22/18 3:04:38 PM by SGLK  
Analysis Method : Z:\DESKTOP\BERTOZZI LAB\LCMS INFO\LCMS METHODS TO 112917\SGLK\_BERTOZZI\_BP\_WITHINSERT.M

Last changed : 3/8/18 8:51:08 AM  
(modified after loading)

Additional Info : Peak(s) manually integrated

Current Chromatogram(s)

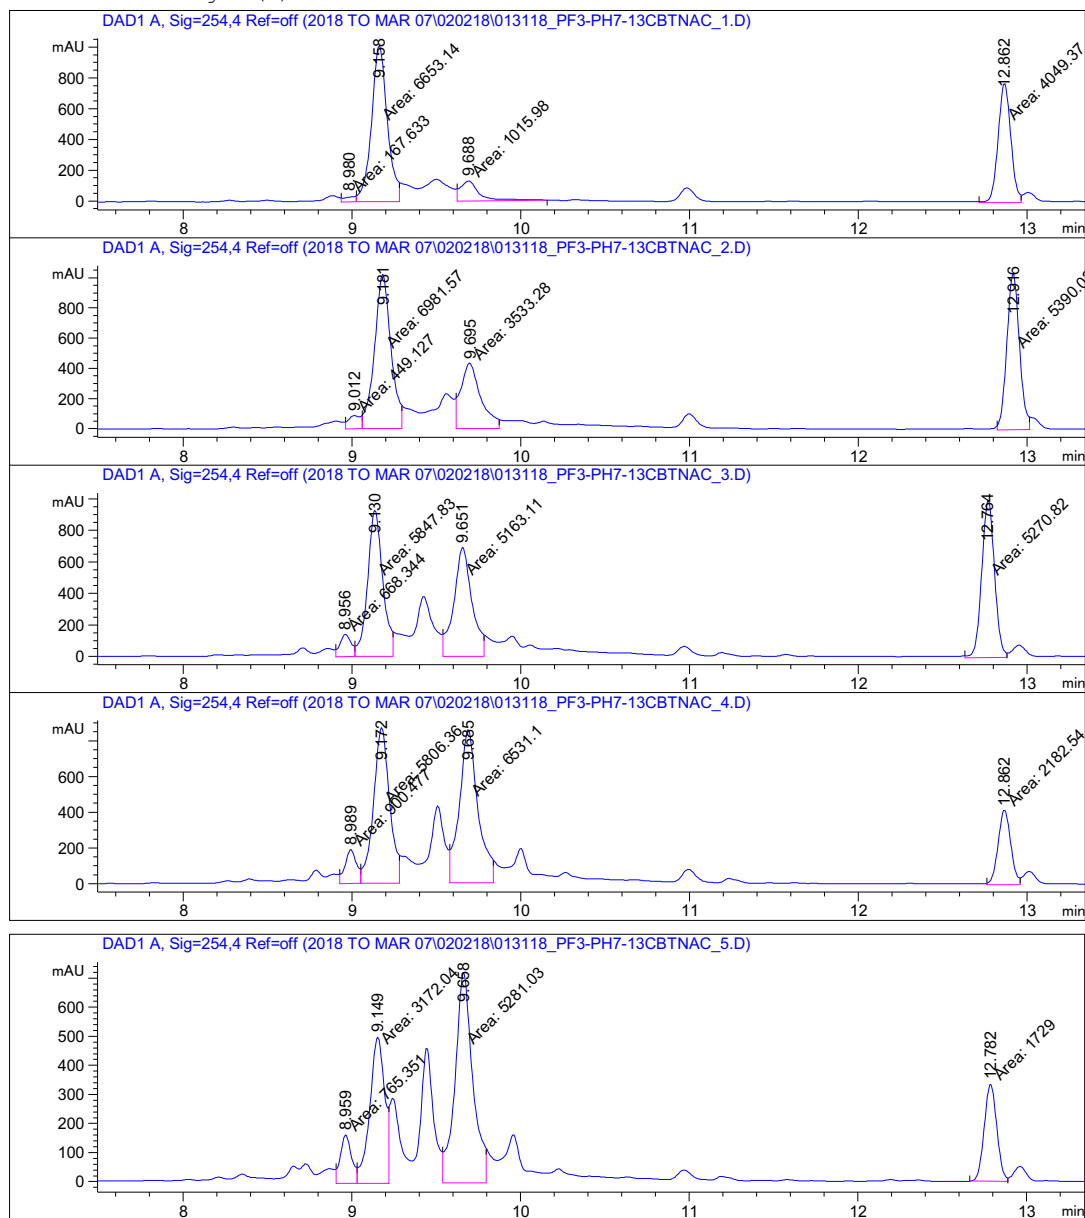

Data File C:\CHEM32\1\DATA\2018 TO MAR 07\020218\013118\_PF3-PH7-13CBTNAC\_1.D  
Sample Name: 013118\_PF3-ph7-13cbtnac\_1

=====  
Integration Results  
=====

Signal 1: DAD1 A, Sig=254,4 Ref=off (2018 TO MAR 07\020218\013118\_PF3-PH7-13CBTNAC\_1.D)

| Peak # | Time [min] | Type | Area [mAU*s] | Height [mAU] | Width [min] | Start [min] | End [min] |
|--------|------------|------|--------------|--------------|-------------|-------------|-----------|
| 1      | 8.980      | MF   | 167.63275    | 40.41625     | 0.0691      | 8.935       | 9.025     |
| 2      | 9.158      | MF   | 6653.14258   | 1013.87598   | 0.1094      | 9.025       | 9.279     |
| 3      | 9.688      | FM   | 1015.97882   | 131.04523    | 0.1292      | 9.622       | 10.154    |
| 4      | 12.862     | MF   | 4049.37402   | 772.72168    | 0.0873      | 12.714      | 12.963    |

Signal 2: DAD1 A, Sig=254,4 Ref=off (2018 TO MAR 07\020218\013118\_PF3-PH7-13CBTNAC\_2.D)

| Peak # | Time [min] | Type | Area [mAU*s] | Height [mAU] | Width [min] | Start [min] | End [min] |
|--------|------------|------|--------------|--------------|-------------|-------------|-----------|
| 1      | 9.012      | FM   | 449.12659    | 88.06937     | 0.0850      | 8.959       | 9.058     |
| 2      | 9.181      | FM   | 6981.57227   | 1022.56451   | 0.1138      | 9.058       | 9.295     |
| 3      | 9.695      | FM   | 3533.27783   | 434.13306    | 0.1356      | 9.614       | 9.872     |
| 4      | 12.916     | FM   | 5390.01611   | 1040.12830   | 0.0864      | 12.820      | 13.013    |

Signal 3: DAD1 A, Sig=254,4 Ref=off (2018 TO MAR 07\020218\013118\_PF3-PH7-13CBTNAC\_3.D)

| Peak # | Time [min] | Type | Area [mAU*s] | Height [mAU] | Width [min] | Start [min] | End [min] |
|--------|------------|------|--------------|--------------|-------------|-------------|-----------|
| 1      | 8.956      | FM   | 668.34357    | 142.29138    | 0.0783      | 8.902       | 9.017     |
| 2      | 9.130      | FM   | 5847.83105   | 930.69971    | 0.1047      | 9.017       | 9.242     |
| 3      | 9.651      | FM   | 5163.11035   | 692.02686    | 0.1243      | 9.536       | 9.782     |
| 4      | 12.764     | MF   | 5270.82471   | 997.93738    | 0.0880      | 12.628      | 12.878    |

Signal 4: DAD1 A, Sig=254,4 Ref=off (2018 TO MAR 07\020218\013118\_PF3-PH7-13CBTNAC\_4.D)

| Peak # | Time [min] | Type | Area [mAU*s] | Height [mAU] | Width [min] | Start [min] | End [min] |
|--------|------------|------|--------------|--------------|-------------|-------------|-----------|
| 1      | 8.989      | FM   | 900.47656    | 190.13754    | 0.0789      | 8.927       | 9.049     |
| 2      | 9.172      | FM   | 5806.35840   | 870.80627    | 0.1111      | 9.049       | 9.279     |
| 3      | 9.685      | FM   | 6531.10059   | 858.56616    | 0.1268      | 9.577       | 9.835     |
| 4      | 12.862     | FM   | 2182.54004   | 418.45169    | 0.0869      | 12.759      | 12.955    |

Signal 5: DAD1 A, Sig=254,4 Ref=off (2018 TO MAR 07\020218\013118\_PF3-PH7-13CBTNAC\_5.D)

| Peak # | Time [min] | Type | Area [mAU*s] | Height [mAU] | Width [min] | Start [min] | End [min] |
|--------|------------|------|--------------|--------------|-------------|-------------|-----------|
| 1      | 8.959      | FM   | 765.35132    | 166.98950    | 0.0764      | 8.906       | 9.029     |
| 2      | 9.149      | FM   | 3172.03857   | 503.40402    | 0.1050      | 9.029       | 9.217     |
| 3      | 9.658      | FM   | 5281.03174   | 725.90582    | 0.1213      | 9.536       | 9.794     |
| 4      | 12.782     | MF   | 1728.99561   | 334.71692    | 0.0861      | 12.661      | 12.886    |

Current Chromatogram(s)

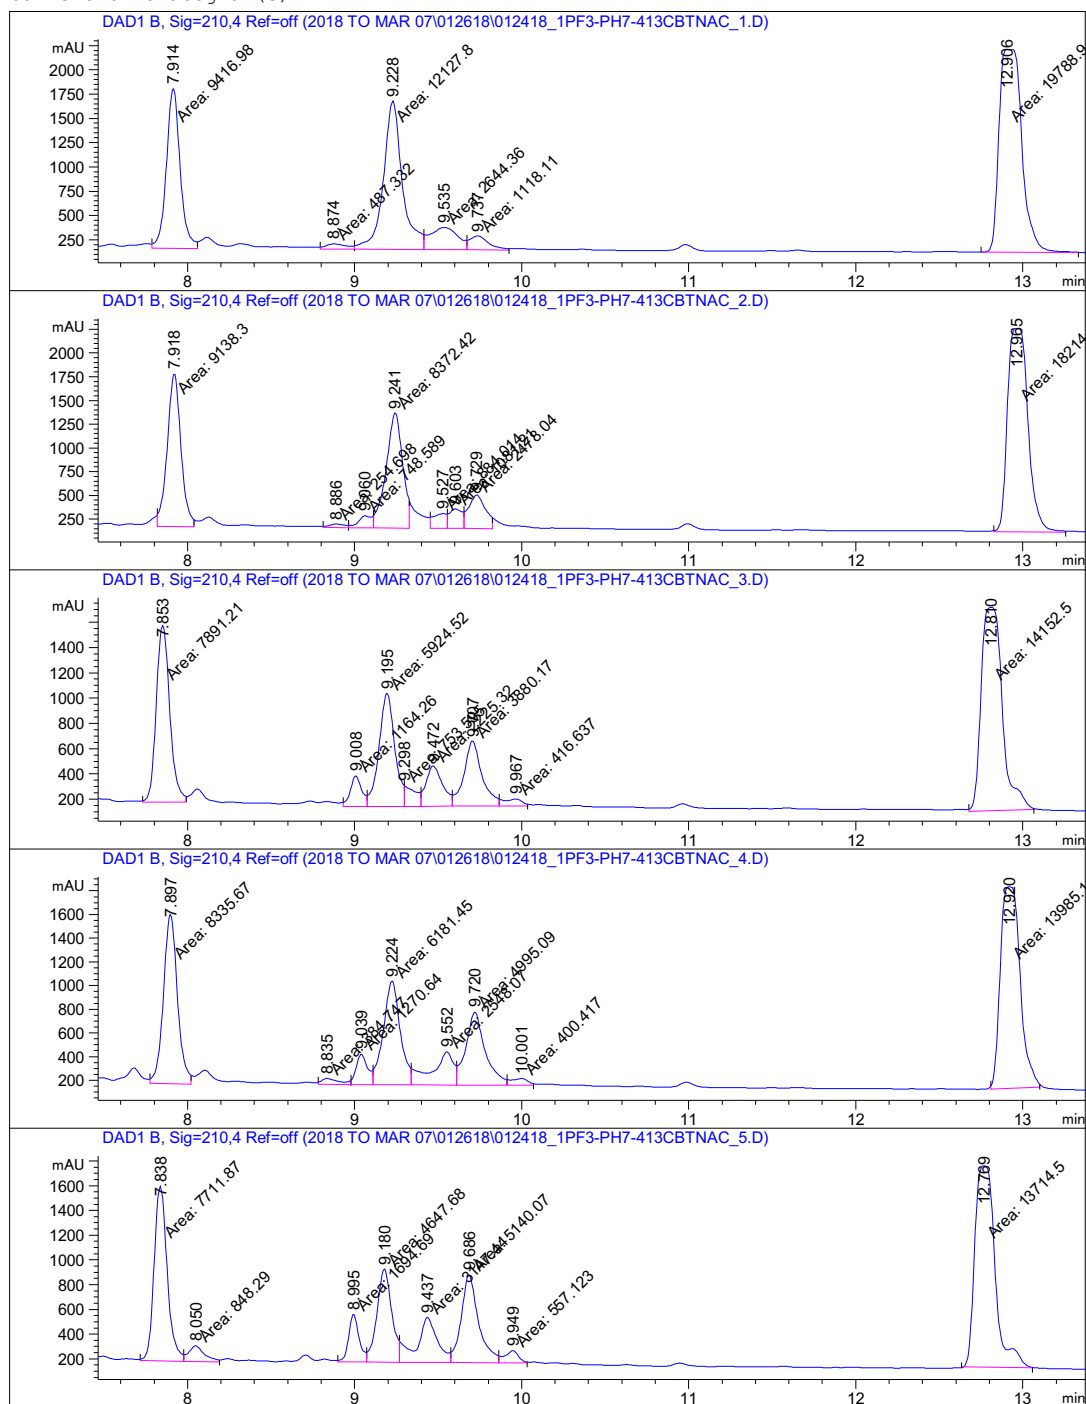

=====  
Integration Results  
=====

Signal 1: DAD1 B, Sig=210,4 Ref=off (2018 TO MAR 07\012618\012418\_1PF3-PH7-413CBTNAC\_1.D)

| Peak # | Time [min] | Type | Area [mAU*s] | Height [mAU] | Width [min] | Start [min] | End [min] |
|--------|------------|------|--------------|--------------|-------------|-------------|-----------|
| 1      | 7.914      | MF   | 9416.98242   | 1647.93689   | 0.0952      | 7.787       | 8.060     |
| 2      | 8.874      | FM   | 487.33218    | 54.21212     | 0.1498      | 8.795       | 8.999     |
| 3      | 9.228      | FM   | 1.21278e4    | 1529.12659   | 0.1322      | 8.999       | 9.416     |
| 4      | 9.535      | FM   | 2644.35767   | 228.19458    | 0.1931      | 9.416       | 9.674     |
| 5      | 9.737      | FM   | 1118.11084   | 142.95132    | 0.1304      | 9.674       | 9.924     |
| 6      | 12.906     | FM   | 1.97889e4    | 2092.50806   | 0.1576      | 12.750      | 13.333    |
| 7      | 17.096     | MM   | 341.25854    | 47.20979     | 0.1205      | 16.977      | 17.244    |

Signal 2: DAD1 B, Sig=210,4 Ref=off (2018 TO MAR 07\012618\012418\_1PF3-PH7-413CBTNAC\_2.D)

| Peak # | Time [min] | Type | Area [mAU*s] | Height [mAU] | Width [min] | Start [min] | End [min] |
|--------|------------|------|--------------|--------------|-------------|-------------|-----------|
| 1      | 7.918      | FM   | 9138.29590   | 1610.67407   | 0.0946      | 7.820       | 8.038     |
| 2      | 8.886      | MF   | 254.69795    | 37.63269     | 0.1128      | 8.811       | 8.965     |
| 3      | 9.060      | FM   | 748.58875    | 126.74625    | 0.0984      | 8.965       | 9.112     |
| 4      | 9.241      | FM   | 8372.42285   | 1212.87939   | 0.1150      | 9.112       | 9.326     |
| 5      | 9.527      | FM   | 884.01447    | 154.15724    | 0.0956      | 9.452       | 9.556     |
| 6      | 9.603      | FM   | 1081.20557   | 205.80222    | 0.0876      | 9.556       | 9.654     |
| 7      | 9.729      | FM   | 2478.03564   | 353.92752    | 0.1167      | 9.654       | 9.825     |
| 8      | 12.965     | FM   | 1.82142e4    | 2143.19775   | 0.1416      | 12.826      | 13.256    |
| 9      | 17.135     | FM   | 137.25032    | 18.79482     | 0.1217      | 17.041      | 17.286    |

Signal 3: DAD1 B, Sig=210,4 Ref=off (2018 TO MAR 07\012618\012418\_1PF3-PH7-413CBTNAC\_3.D)

| Peak # | Time [min] | Type | Area [mAU*s] | Height [mAU] | Width [min] | Start [min] | End [min] |
|--------|------------|------|--------------|--------------|-------------|-------------|-----------|
| 1      | 7.853      | MF   | 7891.20898   | 1398.38062   | 0.0941      | 7.731       | 7.992     |
| 2      | 9.008      | MF   | 1164.25757   | 244.43816    | 0.0794      | 8.933       | 9.075     |
| 3      | 9.195      | MF   | 5924.52051   | 898.11829    | 0.1099      | 9.075       | 9.298     |
| 4      | 9.298      | MF   | 753.59515    | 167.25101    | 0.0595      | 9.298       | 9.396     |
| 5      | 9.472      | MF   | 2225.31738   | 319.45935    | 0.1161      | 9.396       | 9.586     |
| 6      | 9.707      | MF   | 3880.17480   | 515.12500    | 0.1255      | 9.586       | 9.867     |
| 7      | 9.967      | FM   | 416.63672    | 54.89103     | 0.1050      | 9.867       | 10.036    |
| 8      | 12.810     | MM   | 1.41525e4    | 1605.68469   | 0.1469      | 12.676      | 13.068    |
| 9      | 17.018     | FM   | 103.15417    | 13.08915     | 0.1313      | 16.907      | 17.166    |

Data File C:\CHEM32\1\DATA\2018 TO MAR 07\012618\012418\_1PF3-PH7-413CBTNAC\_1.D  
Sample Name: 012418\_1PF3-ph7-413CBTNac\_1

Signal 4: DAD1 B, Sig=210,4 Ref=off (2018 TO MAR 07\012618\012418\_1PF3-PH7-413CBTNAC\_4.D)

| Peak # | Time [min] | Type | Area [mAU*s] | Height [mAU] | Width [min] | Start [min] | End [min] |
|--------|------------|------|--------------|--------------|-------------|-------------|-----------|
| 1      | 7.897      | MF   | 8335.66602   | 1429.31128   | 0.0972      | 7.776       | 8.022     |
| 2      | 8.835      | MF   | 384.74734    | 50.63771     | 0.1266      | 8.782       | 8.979     |
| 3      | 9.039      | FM   | 1270.64465   | 258.62827    | 0.0819      | 8.979       | 9.111     |
| 4      | 9.224      | FM   | 6181.45459   | 876.76721    | 0.1175      | 9.111       | 9.339     |
| 5      | 9.552      | FM   | 2548.07251   | 281.66565    | 0.1508      | 9.339       | 9.610     |
| 6      | 9.720      | FM   | 4995.09375   | 616.77344    | 0.1350      | 9.610       | 9.914     |
| 7      | 10.001     | FM   | 400.41724    | 57.92731     | 0.1152      | 9.914       | 10.071    |
| 8      | 12.920     | MM   | 1.39851e4    | 1702.83252   | 0.1369      | 12.809      | 13.102    |
| 9      | 17.103     | FM   | 84.47837     | 10.66243     | 0.1320      | 16.993      | 17.267    |

Signal 5: DAD1 B, Sig=210,4 Ref=off (2018 TO MAR 07\012618\012418\_1PF3-PH7-413CBTNAC\_5.D)

| Peak # | Time [min] | Type | Area [mAU*s] | Height [mAU] | Width [min] | Start [min] | End [min] |
|--------|------------|------|--------------|--------------|-------------|-------------|-----------|
| 1      | 7.838      | MF   | 7711.86670   | 1410.79956   | 0.0911      | 7.715       | 7.976     |
| 2      | 8.050      | FM   | 848.29047    | 127.37299    | 0.1110      | 7.976       | 8.190     |
| 3      | 8.995      | MF   | 1694.69202   | 389.25287    | 0.0726      | 8.900       | 9.071     |
| 4      | 9.180      | MF   | 4647.68359   | 753.63672    | 0.1028      | 9.071       | 9.268     |
| 5      | 9.437      | MF   | 3147.43799   | 364.28168    | 0.1440      | 9.268       | 9.575     |
| 6      | 9.686      | MF   | 5140.07275   | 710.37439    | 0.1206      | 9.575       | 9.864     |
| 7      | 9.949      | FM   | 557.12329    | 97.50262     | 0.0952      | 9.864       | 10.032    |
| 8      | 12.769     | MM   | 1.37145e4    | 1626.81152   | 0.1405      | 12.634      | 13.059    |
| 9      | 16.978     | FM   | 75.99796     | 9.27865      | 0.1365      | 16.875      | 17.135    |

=====

Current Chromatogram(s)

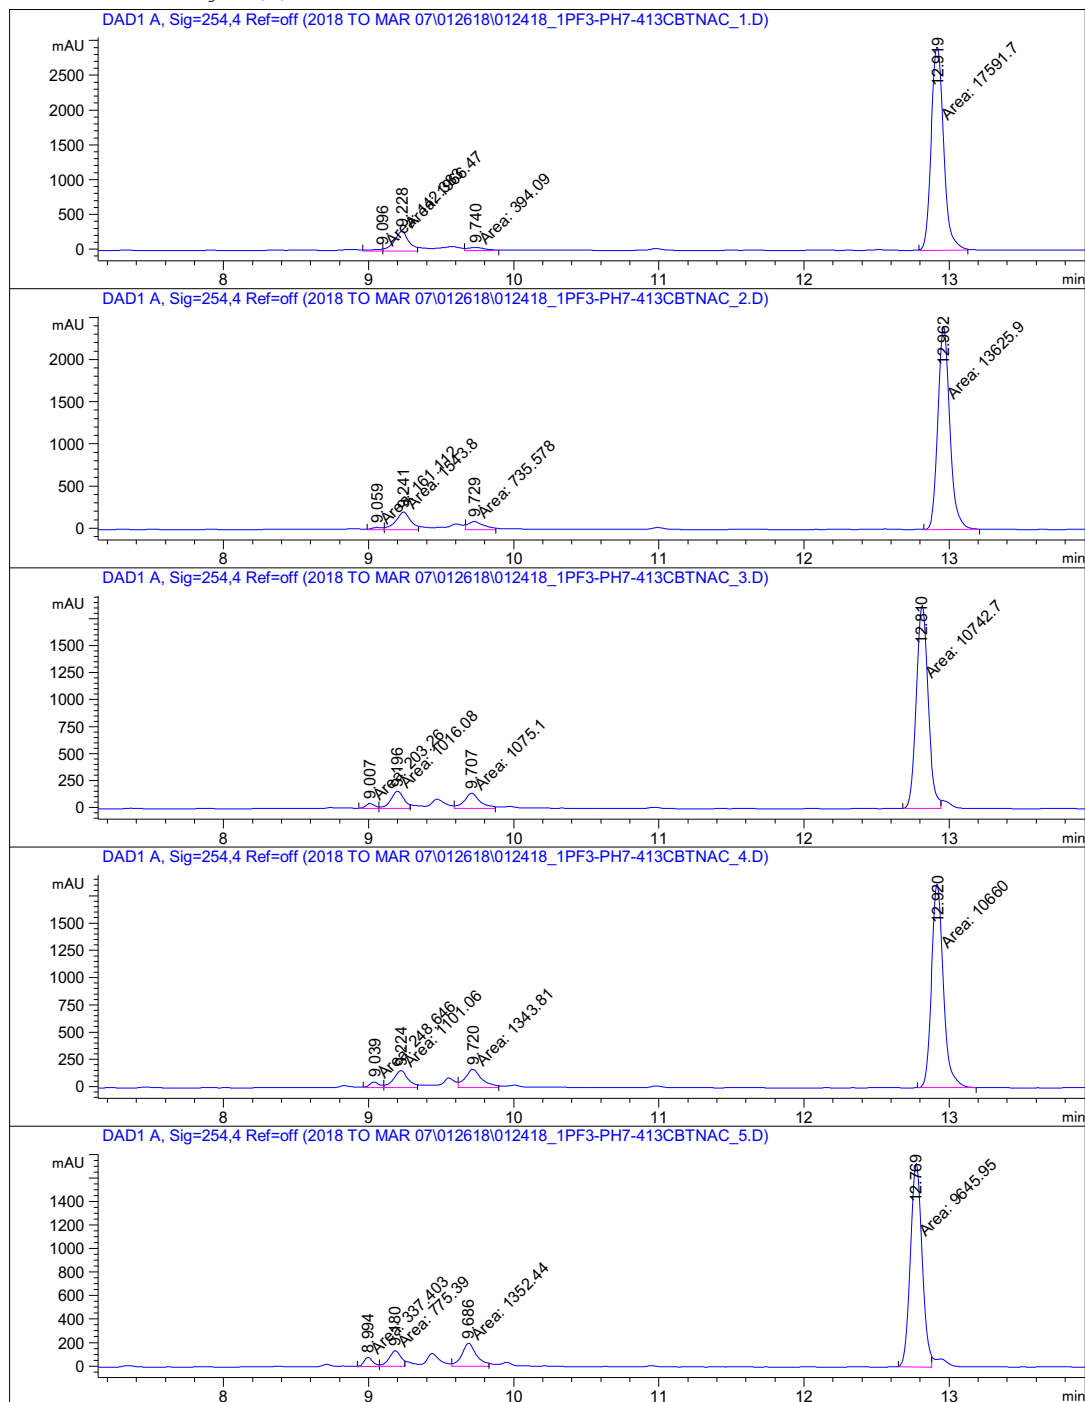

Data File C:\CHEM32\1\DATA\2018 TO MAR 07\012618\012418\_1PF3-PH7-413CBTNAC\_1.D  
Sample Name: 012418\_1PF3-ph7-413CBTNAC\_1

=====  
Integration Results  
=====

Signal 1: DAD1 A, Sig=254,4 Ref=off (2018 TO MAR 07\012618\012418\_1PF3-PH7-413CBTNAC\_1.D)

| Peak # | Time [min] | Type | Area [mAU*s] | Height [mAU] | Width [min] | Start [min] | End [min] |
|--------|------------|------|--------------|--------------|-------------|-------------|-----------|
| 1      | 9.096      | MF   | 142.38287    | 26.04919     | 0.0911      | 8.961       | 9.097     |
| 2      | 9.228      | FM   | 1966.46570   | 281.31848    | 0.1165      | 9.097       | 9.336     |
| 3      | 9.740      | FM   | 394.09006    | 45.81873     | 0.1434      | 9.662       | 9.896     |
| 4      | 12.919     | MM   | 1.75917e4    | 2931.18726   | 0.1000      | 12.792      | 13.128    |

Signal 2: DAD1 A, Sig=254,4 Ref=off (2018 TO MAR 07\012618\012418\_1PF3-PH7-413CBTNAC\_2.D)

| Peak # | Time [min] | Type | Area [mAU*s] | Height [mAU] | Width [min] | Start [min] | End [min] |
|--------|------------|------|--------------|--------------|-------------|-------------|-----------|
| 1      | 9.059      | FM   | 161.11209    | 28.80318     | 0.0932      | 8.991       | 9.109     |
| 2      | 9.241      | FM   | 1543.80066   | 213.12289    | 0.1207      | 9.109       | 9.346     |
| 3      | 9.729      | FM   | 735.57843    | 97.84830     | 0.1253      | 9.668       | 9.876     |
| 4      | 12.962     | MM   | 1.36259e4    | 2410.98779   | 0.0942      | 12.827      | 13.210    |

Signal 3: DAD1 A, Sig=254,4 Ref=off (2018 TO MAR 07\012618\012418\_1PF3-PH7-413CBTNAC\_3.D)

| Peak # | Time [min] | Type | Area [mAU*s] | Height [mAU] | Width [min] | Start [min] | End [min] |
|--------|------------|------|--------------|--------------|-------------|-------------|-----------|
| 1      | 9.007      | FM   | 203.26022    | 46.58055     | 0.0727      | 8.934       | 9.072     |
| 2      | 9.196      | FM   | 1016.08386   | 161.26431    | 0.1050      | 9.072       | 9.288     |
| 3      | 9.707      | FM   | 1075.09631   | 142.35010    | 0.1259      | 9.590       | 9.875     |
| 4      | 12.810     | MF   | 1.07427e4    | 1886.81433   | 0.0949      | 12.681      | 12.946    |

Signal 4: DAD1 A, Sig=254,4 Ref=off (2018 TO MAR 07\012618\012418\_1PF3-PH7-413CBTNAC\_4.D)

| Peak # | Time [min] | Type | Area [mAU*s] | Height [mAU] | Width [min] | Start [min] | End [min] |
|--------|------------|------|--------------|--------------|-------------|-------------|-----------|
| 1      | 9.039      | FM   | 248.64555    | 52.22098     | 0.0794      | 8.962       | 9.105     |
| 2      | 9.224      | FM   | 1101.06201   | 155.99211    | 0.1176      | 9.105       | 9.337     |
| 3      | 9.720      | FM   | 1343.80579   | 168.67032    | 0.1328      | 9.618       | 9.895     |
| 4      | 12.920     | MM   | 1.06600e4    | 1872.36560   | 0.0949      | 12.783      | 13.186    |

Signal 5: DAD1 A, Sig=254,4 Ref=off (2018 TO MAR 07\012618\012418\_1PF3-PH7-413CBTNAC\_5.D)

|   |        |    |            |            |        |        |        |
|---|--------|----|------------|------------|--------|--------|--------|
| 1 | 8.994  | MF | 337.40302  | 79.62730   | 0.0706 | 8.922  | 9.075  |
| 2 | 9.180  | MF | 775.38977  | 133.16174  | 0.0970 | 9.075  | 9.250  |
| 3 | 9.686  | MF | 1352.44153 | 195.07692  | 0.1155 | 9.573  | 9.831  |
| 4 | 12.769 | MF | 9645.94922 | 1733.51257 | 0.0927 | 12.652 | 12.880 |



Print of window 38: Current Chromatogram(s)

Data File : C:\CHEM32\1\DATA\2018 TO MAR 07\020218\013118\_1PF3-PH7-413CBTNAC\_1.D

Sample Name : 013118\_1PF3-ph7-413CBTNac\_1

=====  
Acq. Operator : SGLK Seq. Line : 7  
Acq. Instrument : Instrument 1 Location : Vial 7  
Injection Date : 2/2/18 7:45:39 PM Inj : 1  
Inj Volume : 1.000 µl

Acq. Method : D:\CHEM32\1\METHODS\AP\_C18\_INSERT.M  
Last changed : 1/22/18 3:04:38 PM by SGLK  
Analysis Method : Z:\DESKTOP\BERTOZZI LAB\LCMS INFO\LCMS METHODS TO 112917\SGLK\_BERTOZZI\_BP\_WITHINSERT.M

Last changed : 3/8/18 8:51:08 AM  
(modified after loading)

Additional Info : Peak(s) manually integrated

Current Chromatogram(s)

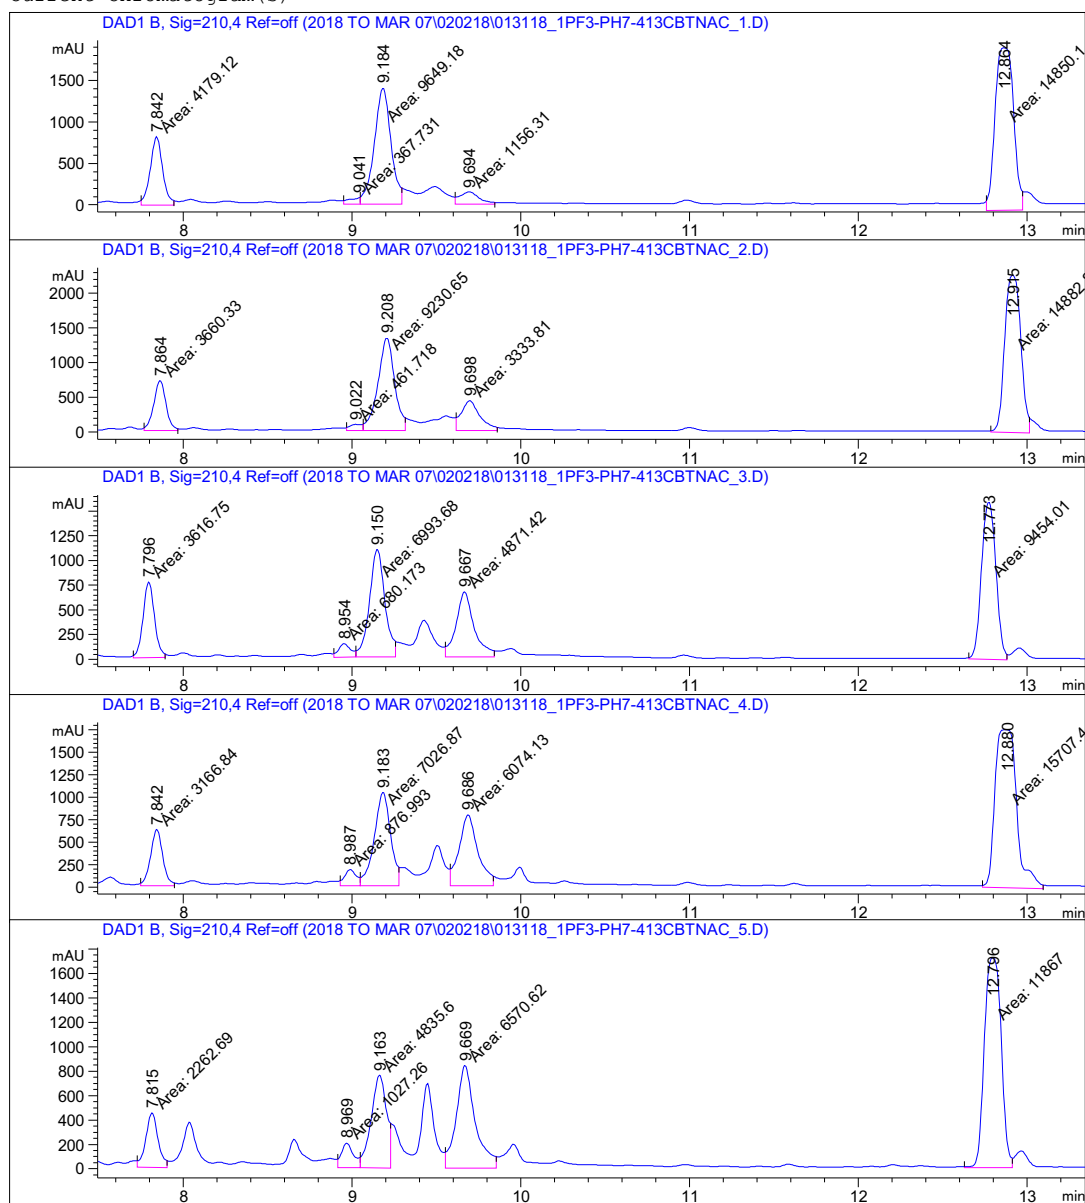

=====  
Integration Results  
=====

Signal 1: DAD1 B, Sig=210,4 Ref=off (2018 TO MAR 07\020218\013118\_1PF3-PH7-413CBTNAC\_1.D)

| Peak # | Time [min] | Type | Area [mAU*s] | Height [mAU] | Width [min] | Start [min] | End [min] |
|--------|------------|------|--------------|--------------|-------------|-------------|-----------|
| 1      | 7.842      | FM   | 4179.11914   | 821.41675    | 0.0848      | 7.749       | 7.942     |
| 2      | 9.041      | FM   | 367.73087    | 78.21339     | 0.0784      | 8.950       | 9.047     |
| 3      | 9.184      | FM   | 9649.18066   | 1400.78040   | 0.1148      | 9.047       | 9.293     |
| 4      | 9.694      | FM   | 1156.30530   | 145.55722    | 0.1324      | 9.609       | 9.843     |
| 5      | 12.864     | FM   | 1.48501e4    | 1956.26233   | 0.1265      | 12.758      | 12.970    |

Signal 2: DAD1 B, Sig=210,4 Ref=off (2018 TO MAR 07\020218\013118\_1PF3-PH7-413CBTNAC\_2.D)

| Peak # | Time [min] | Type | Area [mAU*s] | Height [mAU] | Width [min] | Start [min] | End [min] |
|--------|------------|------|--------------|--------------|-------------|-------------|-----------|
| 1      | 7.864      | FM   | 3660.32935   | 723.93250    | 0.0843      | 7.767       | 7.966     |
| 2      | 9.022      | FM   | 461.71805    | 91.62712     | 0.0840      | 8.968       | 9.064     |
| 3      | 9.208      | FM   | 9230.65137   | 1339.48608   | 0.1149      | 9.064       | 9.313     |
| 4      | 9.698      | FM   | 3333.80762   | 432.63248    | 0.1284      | 9.615       | 9.858     |
| 5      | 12.915     | MF   | 1.48828e4    | 2264.37549   | 0.1095      | 12.782      | 13.012    |

Signal 3: DAD1 B, Sig=210,4 Ref=off (2018 TO MAR 07\020218\013118\_1PF3-PH7-413CBTNAC\_3.D)

| Peak # | Time [min] | Type | Area [mAU*s] | Height [mAU] | Width [min] | Start [min] | End [min] |
|--------|------------|------|--------------|--------------|-------------|-------------|-----------|
| 1      | 7.796      | FM   | 3616.75317   | 768.20435    | 0.0785      | 7.702       | 7.893     |
| 2      | 8.954      | FM   | 680.17310    | 138.71642    | 0.0817      | 8.891       | 9.020     |
| 3      | 9.150      | FM   | 6993.68018   | 1092.80615   | 0.1067      | 9.020       | 9.257     |
| 4      | 9.667      | FM   | 4871.42480   | 657.31110    | 0.1235      | 9.550       | 9.840     |
| 5      | 12.773     | FM   | 9454.00977   | 1592.20349   | 0.0990      | 12.652      | 12.879    |

Signal 4: DAD1 B, Sig=210,4 Ref=off (2018 TO MAR 07\020218\013118\_1PF3-PH7-413CBTNAC\_4.D)

| Peak # | Time [min] | Type | Area [mAU*s] | Height [mAU] | Width [min] | Start [min] | End [min] |
|--------|------------|------|--------------|--------------|-------------|-------------|-----------|
| 1      | 7.842      | FM   | 3166.83960   | 631.48499    | 0.0836      | 7.746       | 7.945     |
| 2      | 8.987      | FM   | 876.99335    | 181.88477    | 0.0804      | 8.929       | 9.047     |
| 3      | 9.183      | FM   | 7026.86963   | 1040.78650   | 0.1125      | 9.047       | 9.275     |
| 4      | 9.686      | FM   | 6074.12842   | 789.74097    | 0.1282      | 9.580       | 9.835     |
| 5      | 12.880     | MM   | 1.57074e4    | 1758.29065   | 0.1489      | 12.735      | 13.092    |

Signal 5: DAD1 B, Sig=210,4 Ref=off (2018 TO MAR 07\020218\013118\_1PF3-PH7-413CBTNAC\_5.D)

| Peak # | Time [min] | Type | Area [mAU*s] | Height [mAU] | Width [min] | Start [min] | End [min] |
|--------|------------|------|--------------|--------------|-------------|-------------|-----------|
| 1      | 7.815      | FM   | 2262.69141   | 448.04358    | 0.0842      | 7.726       | 7.901     |
| 2      | 8.969      | FM   | 1027.25977   | 204.35941    | 0.0838      | 8.915       | 9.047     |
| 3      | 9.163      | FM   | 4835.60400   | 760.72070    | 0.1059      | 9.047       | 9.228     |
| 4      | 9.669      | FM   | 6570.62402   | 840.52429    | 0.1303      | 9.550       | 9.852     |
| 5      | 12.796     | MF   | 1.18670e4    | 1718.16589   | 0.1151      | 12.625      | 12.910    |

Print of window 38: Current Chromatogram(s)

Data File : C:\CHEM32\1\DATA\2018 TO MAR 07\020218\013118\_1PF3-PH7-413CBTNAC\_1.D

Sample Name : 013118\_1PF3-ph7-413CBTNac\_1

=====  
Acq. Operator : SGLK Seq. Line : 7  
Acq. Instrument : Instrument 1 Location : Vial 7  
Injection Date : 2/2/18 7:45:39 PM Inj : 1  
Inj Volume : 1.000 µl

Acq. Method : D:\CHEM32\1\METHODS\AP\_C18\_INSERT.M  
Last changed : 1/22/18 3:04:38 PM by SGLK  
Analysis Method : Z:\DESKTOP\BERTOZZI LAB\LCMS INFO\LCMS METHODS TO 112917\SGLK\_BERTOZZI\_BP\_WITHINSERT.M

Last changed : 3/8/18 8:51:08 AM  
(modified after loading)

Additional Info : Peak(s) manually integrated

Current Chromatogram(s)

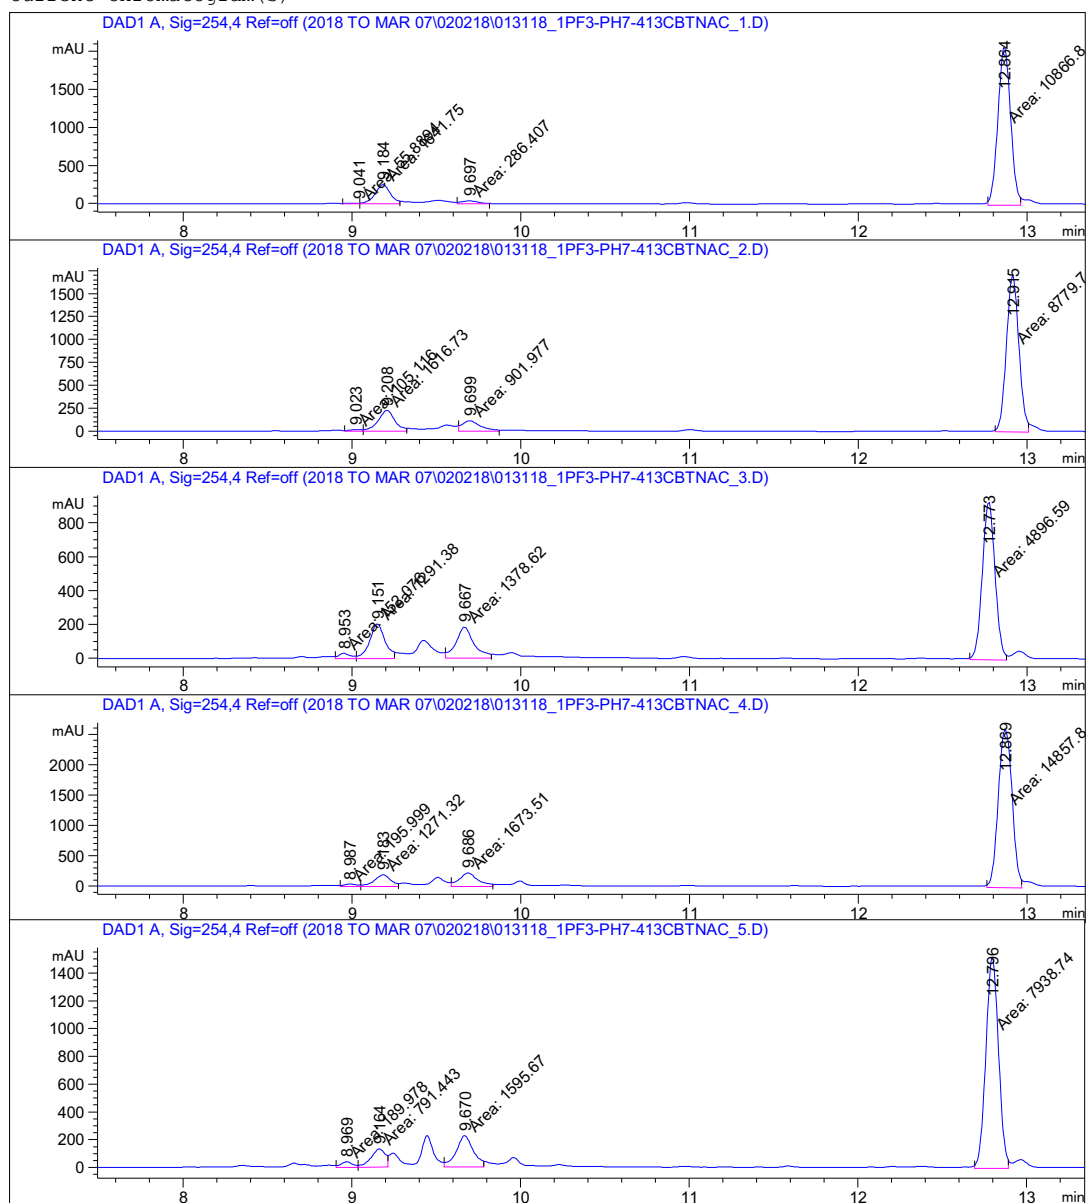

Data File C:\CHEM32\1\DATA\2018 TO MAR 07\020218\013118\_1PF3-PH7-413CBTNAC\_1.D  
 Sample Name: 013118\_1PF3-ph7-413CBTNac\_1

=====  
 Integration Results  
 =====

Signal 1: DAD1 A, Sig=254,4 Ref=off (2018 TO MAR 07\020218\013118\_1PF3-PH7-413CBTNAC\_1.D)

| Peak # | Time [min] | Type | Area [mAU*s] | Height [mAU] | Width [min] | Start [min] | End [min] |
|--------|------------|------|--------------|--------------|-------------|-------------|-----------|
| 1      | 9.041      | FM   | 55.88944     | 11.06242     | 0.0842      | 8.942       | 9.044     |
| 2      | 9.184      | FM   | 1641.74548   | 253.71167    | 0.1078      | 9.044       | 9.283     |
| 3      | 9.697      | FM   | 286.40692    | 40.31698     | 0.1184      | 9.622       | 9.811     |
| 4      | 12.864     | FM   | 1.08668e4    | 2075.80518   | 0.0872      | 12.765      | 12.958    |

Signal 2: DAD1 A, Sig=254,4 Ref=off (2018 TO MAR 07\020218\013118\_1PF3-PH7-413CBTNAC\_2.D)

| Peak # | Time [min] | Type | Area [mAU*s] | Height [mAU] | Width [min] | Start [min] | End [min] |
|--------|------------|------|--------------|--------------|-------------|-------------|-----------|
| 1      | 9.023      | FM   | 105.11598    | 19.44548     | 0.0901      | 8.956       | 9.064     |
| 2      | 9.208      | FM   | 1616.72717   | 230.14301    | 0.1171      | 9.064       | 9.324     |
| 3      | 9.699      | FM   | 901.97675    | 117.54403    | 0.1279      | 9.631       | 9.870     |
| 4      | 12.915     | FM   | 8779.70313   | 1712.29663   | 0.0855      | 12.808      | 13.006    |

Signal 3: DAD1 A, Sig=254,4 Ref=off (2018 TO MAR 07\020218\013118\_1PF3-PH7-413CBTNAC\_3.D)

| Peak # | Time [min] | Type | Area [mAU*s] | Height [mAU] | Width [min] | Start [min] | End [min] |
|--------|------------|------|--------------|--------------|-------------|-------------|-----------|
| 1      | 8.953      | FM   | 152.07585    | 30.38887     | 0.0834      | 8.899       | 9.024     |
| 2      | 9.151      | FM   | 1291.37805   | 203.47014    | 0.1058      | 9.024       | 9.252     |
| 3      | 9.667      | FM   | 1378.61804   | 184.58427    | 0.1245      | 9.552       | 9.823     |
| 4      | 12.773     | FM   | 4896.59473   | 931.85321    | 0.0876      | 12.659      | 12.874    |

Signal 4: DAD1 A, Sig=254,4 Ref=off (2018 TO MAR 07\020218\013118\_1PF3-PH7-413CBTNAC\_4.D)

| Peak # | Time [min] | Type | Area [mAU*s] | Height [mAU] | Width [min] | Start [min] | End [min] |
|--------|------------|------|--------------|--------------|-------------|-------------|-----------|
| 1      | 8.987      | FM   | 195.99939    | 38.38641     | 0.0851      | 8.929       | 9.051     |
| 2      | 9.183      | FM   | 1271.32251   | 188.63309    | 0.1123      | 9.051       | 9.274     |
| 3      | 9.686      | FM   | 1673.51196   | 218.45514    | 0.1277      | 9.586       | 9.832     |
| 4      | 12.869     | MF   | 1.48578e4    | 2598.30322   | 0.0953      | 12.759      | 12.964    |

Signal 5: DAD1 A, Sig=254,4 Ref=off (2018 TO MAR 07\020218\013118\_1PF3-PH7-413CBTNAC\_5.D)

| Peak # | Time [min] | Type | Area [mAU*s] | Height [mAU] | Width [min] | Start [min] | End [min] |
|--------|------------|------|--------------|--------------|-------------|-------------|-----------|
| 1      | 0.980      | BB   | 31.18398     | 7.66578e-1   | 0.4986      | 1.45e-3     | 1.063     |
| 2      | 8.969      | FM   | 189.97842    | 40.02207     | 0.0791      | 8.906       | 9.035     |
| 3      | 9.164      | FM   | 791.44257    | 130.94086    | 0.1007      | 9.035       | 9.213     |
| 4      | 9.670      | FM   | 1595.67419   | 225.92827    | 0.1177      | 9.545       | 9.782     |
| 5      | 12.796     | FM   | 7938.74023   | 1519.81384   | 0.0871      | 12.690      | 12.891    |



=====  
 Integration Results  
 =====

Signal 1: DAD1 B, Sig=210,4 Ref=off (2018 TO MAR 07\012618\012418\_4PF3-PH7-13CBTNAC\_1.D)

| Peak # | Time [min] | Type | Area [mAU*s] | Height [mAU] | Width [min] | Start [min] | End [min] |
|--------|------------|------|--------------|--------------|-------------|-------------|-----------|
| 1      | 7.860      | MF   | 1.84950e4    | 2050.75513   | 0.1503      | 7.720       | 8.024     |
| 2      | 8.089      | MF   | 2392.83325   | 382.49109    | 0.1043      | 8.024       | 8.210     |
| 3      | 8.870      | MF   | 765.58057    | 85.67575     | 0.1489      | 8.776       | 8.971     |
| 4      | 9.060      | MF   | 642.70343    | 166.08194    | 0.0645      | 8.971       | 9.062     |
| 5      | 9.208      | MF   | 1.85275e4    | 2048.39893   | 0.1507      | 9.062       | 9.343     |
| 6      | 9.715      | MF   | 2025.30261   | 257.27994    | 0.1312      | 9.638       | 9.885     |
| 7      | 12.896     | MF   | 1810.43713   | 333.72260    | 0.0904      | 12.793      | 12.981    |
| 8      | 17.091     | MM   | 3022.47485   | 399.32254    | 0.1262      | 16.939      | 17.285    |

Signal 2: DAD1 B, Sig=210,4 Ref=off (2018 TO MAR 07\012618\012418\_4PF3-PH7-13CBTNAC\_2.D)

| Peak # | Time [min] | Type | Area [mAU*s] | Height [mAU] | Width [min] | Start [min] | End [min] |
|--------|------------|------|--------------|--------------|-------------|-------------|-----------|
| 1      | 7.894      | FM   | 2.06262e4    | 2095.16553   | 0.1641      | 7.694       | 8.040     |
| 2      | 8.117      | FM   | 2581.28320   | 382.76730    | 0.1124      | 8.040       | 8.218     |
| 3      | 9.056      | FM   | 2080.65186   | 425.99606    | 0.0814      | 8.969       | 9.100     |
| 4      | 9.232      | FM   | 1.89702e4    | 2035.62708   | 0.1553      | 9.100       | 9.433     |
| 5      | 9.726      | FM   | 6051.60547   | 719.79962    | 0.1401      | 9.636       | 9.945     |
| 6      | 12.955     | MM   | 1533.16333   | 254.23740    | 0.1005      | 12.864      | 13.138    |
| 7      | 17.131     | MM   | 1801.86560   | 237.32285    | 0.1265      | 16.935      | 17.304    |
| 8      | 27.940     | BBA  | 1001.94745   | 111.75077    | 0.1494      | 27.807      | 28.000    |

Signal 3: DAD1 B, Sig=210,4 Ref=off (2018 TO MAR 07\012618\012418\_4PF3-PH7-13CBTNAC\_3.D)

| Peak # | Time [min] | Type | Area [mAU*s] | Height [mAU] | Width [min] | Start [min] | End [min] |
|--------|------------|------|--------------|--------------|-------------|-------------|-----------|
| 1      | 7.386      | MF   | 7936.72314   | 765.12000    | 0.1729      | 7.089       | 7.572     |
| 2      | 7.842      | MF   | 1.41918e4    | 1574.01428   | 0.1503      | 7.712       | 7.979     |
| 3      | 8.066      | MF   | 2933.36401   | 388.90378    | 0.1257      | 7.979       | 8.220     |
| 4      | 9.008      | MF   | 3157.13452   | 698.73083    | 0.0753      | 8.918       | 9.071     |
| 5      | 9.190      | MF   | 1.21071e4    | 1499.39441   | 0.1346      | 9.071       | 9.325     |
| 6      | 9.704      | MF   | 7429.56299   | 972.61151    | 0.1273      | 9.604       | 9.896     |
| 7      | 12.807     | MF   | 1474.88635   | 268.96881    | 0.0914      | 12.678      | 12.932    |
| 8      | 17.020     | MM   | 1165.90271   | 149.83099    | 0.1297      | 16.844      | 17.177    |
| 9      | 27.049     | HH   | 38.29931     | 3.93957      | 0.1554      | 26.843      | 27.199    |
| 10     | 27.931     | BBA  | 964.60730    | 97.13586     | 0.1655      | 27.769      | 27.996    |

Data File C:\CHEM32\1\DATA\2018 TO MAR 07\012618\012418\_4PF3-PH7-13CBTNAC\_1.D  
Sample Name: 012218\_Pf3-ph8-azidoCBTNac\_1

Signal 4: DAD1 B, Sig=210,4 Ref=off (2018 TO MAR 07\012618\012418\_4PF3-PH7-13CBTNAC\_4.D)

| Peak # | Time [min] | Type | Area [mAU*s] | Height [mAU] | Width [min] | Start [min] | End [min] |
|--------|------------|------|--------------|--------------|-------------|-------------|-----------|
| 1      | 7.681      | FM   | 3636.06616   | 680.77594    | 0.0890      | 7.600       | 7.738     |
| 2      | 7.881      | FM   | 1.56507e4    | 1654.62610   | 0.1576      | 7.738       | 8.014     |
| 3      | 8.118      | FM   | 9029.92383   | 1248.92078   | 0.1205      | 8.014       | 8.327     |
| 4      | 9.038      | FM   | 3078.17871   | 652.84564    | 0.0786      | 8.975       | 9.099     |
| 5      | 9.219      | FM   | 1.22704e4    | 1517.02673   | 0.1348      | 9.099       | 9.339     |
| 6      | 9.714      | FM   | 9018.74121   | 1109.87085   | 0.1354      | 9.616       | 9.914     |
| 7      | 12.914     | MF   | 1438.77722   | 274.10233    | 0.0875      | 12.795      | 12.995    |
| 8      | 17.100     | MM   | 878.28180    | 117.26001    | 0.1248      | 16.955      | 17.257    |
| 9      | 27.939     | HBA  | 5135.85693   | 416.95944    | 0.2053      | 27.132      | 27.999    |

=====





=====  
Integration Results  
=====

Signal 1: DAD1 A, Sig=254,4 Ref=off (2018 TO MAR 07\012618\012418\_4PF3-PH7-13CBTNAC\_1.D)

| Peak # | Time [min] | Type | Area [mAU*s] | Height [mAU] | Width [min] | Start [min] | End [min] |
|--------|------------|------|--------------|--------------|-------------|-------------|-----------|
| 1      | 9.073      | FM   | 109.53465    | 26.67127     | 0.0684      | 8.975       | 9.077     |
| 2      | 9.208      | FM   | 3892.34985   | 579.80493    | 0.1119      | 9.077       | 9.332     |
| 3      | 9.718      | FM   | 553.98206    | 74.16487     | 0.1245      | 9.638       | 9.879     |
| 4      | 12.896     | MF   | 767.04785    | 139.52420    | 0.0916      | 12.774      | 12.987    |

Signal 2: DAD1 A, Sig=254,4 Ref=off (2018 TO MAR 07\012618\012418\_4PF3-PH7-13CBTNAC\_2.D)

| Peak # | Time [min] | Type | Area [mAU*s] | Height [mAU] | Width [min] | Start [min] | End [min] |
|--------|------------|------|--------------|--------------|-------------|-------------|-----------|
| 1      | 9.055      | FM   | 369.18109    | 77.76151     | 0.0791      | 8.970       | 9.104     |
| 2      | 9.232      | FM   | 3423.59888   | 478.64450    | 0.1192      | 9.104       | 9.360     |
| 3      | 9.726      | FM   | 1544.29590   | 191.12616    | 0.1347      | 9.642       | 9.902     |
| 4      | 12.955     | MF   | 589.09991    | 108.67957    | 0.0903      | 12.857      | 13.029    |

Signal 3: DAD1 A, Sig=254,4 Ref=off (2018 TO MAR 07\012618\012418\_4PF3-PH7-13CBTNAC\_3.D)

| Peak # | Time [min] | Type | Area [mAU*s] | Height [mAU] | Width [min] | Start [min] | End [min] |
|--------|------------|------|--------------|--------------|-------------|-------------|-----------|
| 1      | 9.008      | MF   | 556.58862    | 136.95667    | 0.0677      | 8.942       | 9.077     |
| 2      | 9.191      | FM   | 2360.06812   | 378.14111    | 0.1040      | 9.077       | 9.295     |
| 3      | 9.703      | FM   | 2024.40527   | 277.56799    | 0.1216      | 9.582       | 9.879     |
| 4      | 12.807     | MF   | 596.59241    | 112.93456    | 0.0880      | 12.713      | 12.913    |

Signal 4: DAD1 A, Sig=254,4 Ref=off (2018 TO MAR 07\012618\012418\_4PF3-PH7-13CBTNAC\_4.D)

| Peak # | Time [min] | Type | Area [mAU*s] | Height [mAU] | Width [min] | Start [min] | End [min] |
|--------|------------|------|--------------|--------------|-------------|-------------|-----------|
| 1      | 9.038      | FM   | 612.48633    | 130.93390    | 0.0780      | 8.951       | 9.104     |
| 2      | 9.219      | FM   | 2387.05029   | 345.88968    | 0.1150      | 9.104       | 9.322     |
| 3      | 9.715      | FM   | 2560.03564   | 324.88141    | 0.1313      | 9.615       | 9.893     |
| 4      | 12.914     | MF   | 623.71161    | 117.50446    | 0.0885      | 12.825      | 13.001    |

Print of window 38: Current Chromatogram(s)

Data File : C:\CHEM32\1\DATA\2018 TO MAR 07\020218\013118\_4PF3-PH7-13CBTNAC\_1.D

Sample Name : 013118\_4PF3-ph7-13CBTNAC\_1

=====  
Acq. Operator : SGLK Seq. Line : 6  
Acq. Instrument : Instrument 1 Location : Vial 6  
Injection Date : 2/2/18 7:16:34 PM Inj : 1  
Inj Volume : 1.000 µl

Acq. Method : D:\CHEM32\1\METHODS\AP\_C18\_INSERT.M  
Last changed : 1/22/18 3:04:38 PM by SGLK  
Analysis Method : Z:\DESKTOP\BERTOZZI LAB\LCMS INFO\LCMS METHODS TO 112917\SGLK\_BERTOZZI\_BP\_WITHINSERT.M

Last changed : 3/8/18 8:51:08 AM  
(modified after loading)

Additional Info : Peak(s) manually integrated

Current Chromatogram(s)

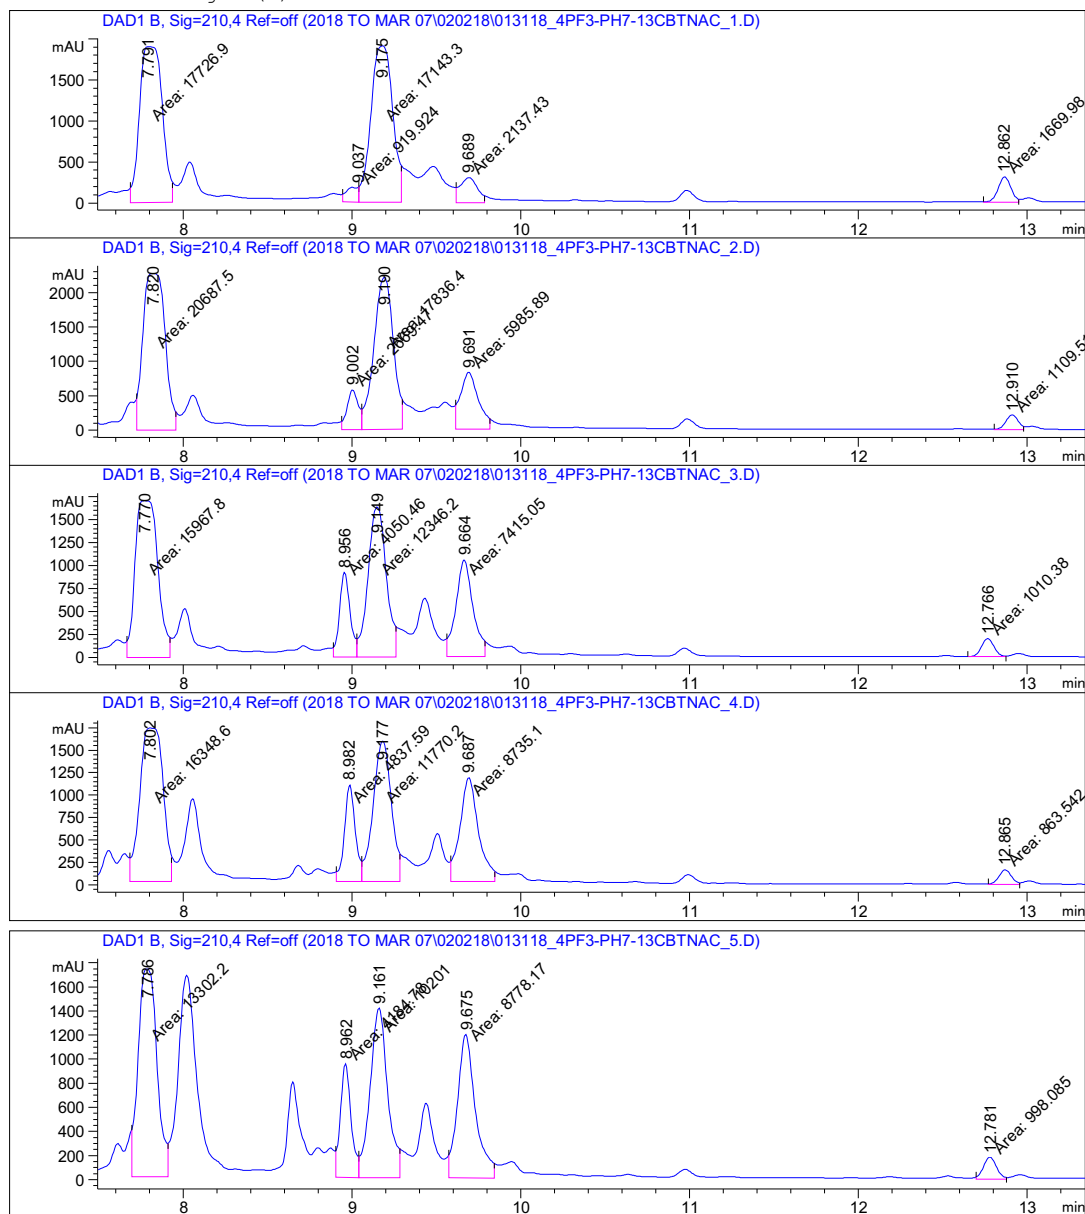

Data File C:\CHEM32\1\DATA\2018 TO MAR 07\020218\013118\_4PF3-PH7-13CBTNAC\_1.D  
Sample Name: 013118\_4PF3-ph7-13CBTNAC\_1

=====  
Integration Results  
=====

Signal 1: DAD1 B, Sig=210,4 Ref=off (2018 TO MAR 07\020218\013118\_4PF3-PH7-13CBTNAC\_1.D)

| Peak # | Time [min] | Type | Area [mAU*s] | Height [mAU] | Width [min] | Start [min] | End [min] |
|--------|------------|------|--------------|--------------|-------------|-------------|-----------|
| 1      | 7.791      | FM   | 1.77269e4    | 1896.11926   | 0.1558      | 7.684       | 7.935     |
| 2      | 9.037      | FM   | 919.92407    | 184.64258    | 0.0830      | 8.943       | 9.039     |
| 3      | 9.175      | FM   | 1.71433e4    | 1902.55383   | 0.1502      | 9.039       | 9.290     |
| 4      | 9.689      | FM   | 2137.42554   | 306.13031    | 0.1164      | 9.615       | 9.783     |
| 5      | 12.862     | MF   | 1669.97876   | 311.27527    | 0.0894      | 12.740      | 12.947    |

Signal 2: DAD1 B, Sig=210,4 Ref=off (2018 TO MAR 07\020218\013118\_4PF3-PH7-13CBTNAC\_2.D)

| Peak # | Time [min] | Type | Area [mAU*s] | Height [mAU] | Width [min] | Start [min] | End [min] |
|--------|------------|------|--------------|--------------|-------------|-------------|-----------|
| 1      | 7.820      | MF   | 2.06875e4    | 2273.26367   | 0.1517      | 7.722       | 7.955     |
| 2      | 9.002      | MF   | 2669.47339   | 576.34473    | 0.0772      | 8.938       | 9.056     |
| 3      | 9.190      | MF   | 1.78364e4    | 2205.12256   | 0.1348      | 9.056       | 9.297     |
| 4      | 9.691      | MF   | 5985.88770   | 826.99255    | 0.1206      | 9.614       | 9.815     |
| 5      | 12.910     | MF   | 1109.50574   | 216.23482    | 0.0855      | 12.802      | 12.978    |

Signal 3: DAD1 B, Sig=210,4 Ref=off (2018 TO MAR 07\020218\013118\_4PF3-PH7-13CBTNAC\_3.D)

| Peak # | Time [min] | Type | Area [mAU*s] | Height [mAU] | Width [min] | Start [min] | End [min] |
|--------|------------|------|--------------|--------------|-------------|-------------|-----------|
| 1      | 7.770      | MF   | 1.59678e4    | 1708.92773   | 0.1557      | 7.666       | 7.921     |
| 2      | 8.956      | MF   | 4050.46216   | 925.19824    | 0.0730      | 8.888       | 9.028     |
| 3      | 9.149      | MF   | 1.23462e4    | 1635.00671   | 0.1259      | 9.028       | 9.260     |
| 4      | 9.664      | MF   | 7415.04932   | 1055.82605   | 0.1170      | 9.561       | 9.787     |
| 5      | 12.766     | MF   | 1010.38171   | 196.10500    | 0.0859      | 12.645      | 12.871    |

Signal 4: DAD1 B, Sig=210,4 Ref=off (2018 TO MAR 07\020218\013118\_4PF3-PH7-13CBTNAC\_4.D)

| Peak # | Time [min] | Type | Area [mAU*s] | Height [mAU] | Width [min] | Start [min] | End [min] |
|--------|------------|------|--------------|--------------|-------------|-------------|-----------|
| 1      | 7.802      | FM   | 1.63486e4    | 1706.57397   | 0.1597      | 7.682       | 7.930     |
| 2      | 8.982      | FM   | 4837.59375   | 1077.47766   | 0.0748      | 8.907       | 9.056     |
| 3      | 9.177      | FM   | 1.17702e4    | 1562.65039   | 0.1255      | 9.056       | 9.282     |
| 4      | 9.687      | FM   | 8735.09570   | 1156.13318   | 0.1259      | 9.583       | 9.843     |
| 5      | 12.865     | FM   | 863.54230    | 162.56932    | 0.0885      | 12.768      | 12.954    |

Signal 5: DAD1 B, Sig=210,4 Ref=off (2018 TO MAR 07\020218\013118\_4PF3-PH7-13CBTNAC\_5.D)

| Peak # | Time [min] | Type | Area [mAU*s] | Height [mAU] | Width [min] | Start [min] | End [min] |
|--------|------------|------|--------------|--------------|-------------|-------------|-----------|
| 1      | 7.786      | MF   | 1.33022e4    | 1725.83533   | 0.1285      | 7.694       | 7.908     |
| 2      | 8.962      | MF   | 4184.78467   | 947.06653    | 0.0736      | 8.904       | 9.040     |
| 3      | 9.161      | MF   | 1.02010e4    | 1408.12524   | 0.1207      | 9.040       | 9.282     |
| 4      | 9.675      | MF   | 8778.17090   | 1192.27075   | 0.1227      | 9.573       | 9.840     |
| 5      | 12.781     | MF   | 998.08514    | 184.60497    | 0.0901      | 12.695      | 12.875    |

Print of window 38: Current Chromatogram(s)

Data File : C:\CHEM32\1\DATA\2018 TO MAR 07\020218\013118\_4PF3-PH7-13CBTNAC\_1.D

Sample Name : 013118\_4PF3-ph7-13CBTNAC\_1

=====  
Acq. Operator : SGLK Seq. Line : 6  
Acq. Instrument : Instrument 1 Location : Vial 6  
Injection Date : 2/2/18 7:16:34 PM Inj : 1  
Inj Volume : 1.000 µl

Acq. Method : D:\CHEM32\1\METHODS\AP\_C18\_INSERT.M  
Last changed : 1/22/18 3:04:38 PM by SGLK  
Analysis Method : Z:\DESKTOP\BERTOZZI LAB\LCMS INFO\LCMS METHODS TO 112917\SGLK\_BERTOZZI\_BP\_WITHINSERT.M

Last changed : 3/8/18 8:51:08 AM  
(modified after loading)

Additional Info : Peak(s) manually integrated

Current Chromatogram(s)

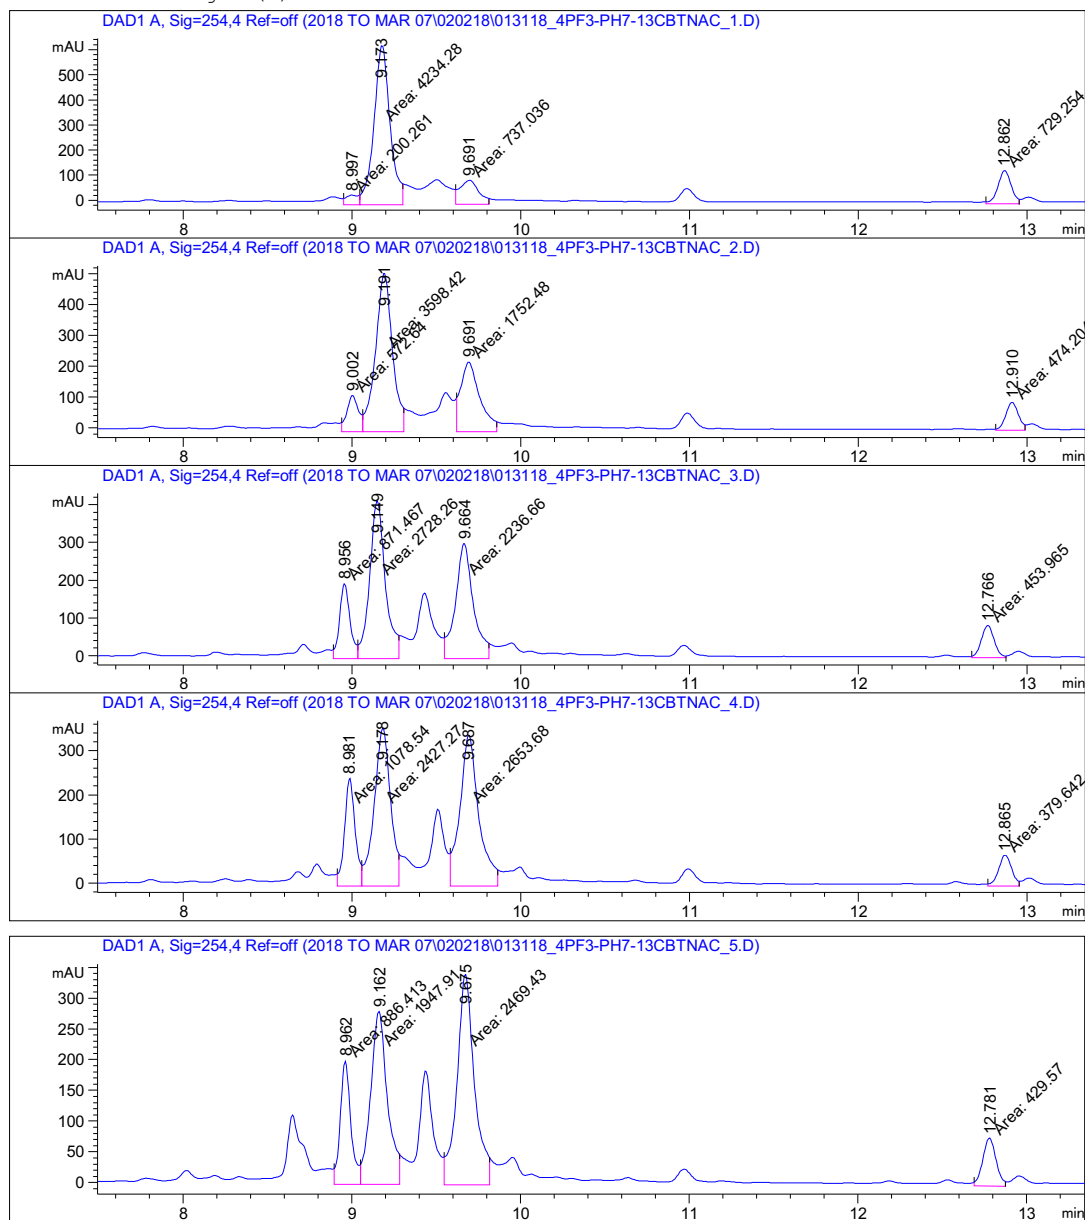

Data File C:\CHEM32\1\DATA\2018 TO MAR 07\020218\013118\_4PF3-PH7-13CBTNAC\_1.D  
 Sample Name: 013118\_4PF3-ph7-13CBTNac\_1

=====  
 Integration Results  
 =====

Signal 1: DAD1 A, Sig=254,4 Ref=off (2018 TO MAR 07\020218\013118\_4PF3-PH7-13CBTNAC\_1.D)

| Peak # | Time [min] | Type | Area [mAU*s] | Height [mAU] | Width [min] | Start [min] | End [min] |
|--------|------------|------|--------------|--------------|-------------|-------------|-----------|
| 1      | 8.997      | MF   | 200.26137    | 38.45741     | 0.0868      | 8.950       | 9.045     |
| 2      | 9.173      | MF   | 4234.27588   | 634.43121    | 0.1112      | 9.045       | 9.299     |
| 3      | 9.691      | MF   | 737.03558    | 96.44783     | 0.1274      | 9.614       | 9.811     |
| 4      | 12.862     | MF   | 729.25427    | 132.65248    | 0.0916      | 12.754      | 12.951    |

Signal 2: DAD1 A, Sig=254,4 Ref=off (2018 TO MAR 07\020218\013118\_4PF3-PH7-13CBTNAC\_2.D)

| Peak # | Time [min] | Type | Area [mAU*s] | Height [mAU] | Width [min] | Start [min] | End [min] |
|--------|------------|------|--------------|--------------|-------------|-------------|-----------|
| 1      | 9.002      | FM   | 572.63983    | 118.38261    | 0.0806      | 8.938       | 9.062     |
| 2      | 9.191      | FM   | 3598.41650   | 516.68695    | 0.1161      | 9.062       | 9.304     |
| 3      | 9.691      | FM   | 1752.47876   | 226.24167    | 0.1291      | 9.619       | 9.856     |
| 4      | 12.910     | MF   | 474.20395    | 90.58943     | 0.0872      | 12.811      | 12.985    |

Signal 3: DAD1 A, Sig=254,4 Ref=off (2018 TO MAR 07\020218\013118\_4PF3-PH7-13CBTNAC\_3.D)

| Peak # | Time [min] | Type | Area [mAU*s] | Height [mAU] | Width [min] | Start [min] | End [min] |
|--------|------------|------|--------------|--------------|-------------|-------------|-----------|
| 1      | 8.956      | FM   | 871.46686    | 199.60472    | 0.0728      | 8.888       | 9.034     |
| 2      | 9.149      | FM   | 2728.26025   | 419.56812    | 0.1084      | 9.034       | 9.276     |
| 3      | 9.664      | FM   | 2236.65991   | 306.16095    | 0.1218      | 9.546       | 9.811     |
| 4      | 12.766     | FM   | 453.96454    | 85.18710     | 0.0888      | 12.670      | 12.873    |

Signal 4: DAD1 A, Sig=254,4 Ref=off (2018 TO MAR 07\020218\013118\_4PF3-PH7-13CBTNAC\_4.D)

| Peak # | Time [min] | Type | Area [mAU*s] | Height [mAU] | Width [min] | Start [min] | End [min] |
|--------|------------|------|--------------|--------------|-------------|-------------|-----------|
| 1      | 8.981      | FM   | 1078.54163   | 244.56328    | 0.0735      | 8.910       | 9.057     |
| 2      | 9.178      | FM   | 2427.26831   | 358.23096    | 0.1129      | 9.057       | 9.276     |
| 3      | 9.687      | FM   | 2653.67725   | 342.92633    | 0.1290      | 9.580       | 9.861     |
| 4      | 12.865     | FM   | 379.64224    | 70.02226     | 0.0904      | 12.766      | 12.951    |

Signal 5: DAD1 A, Sig=254,4 Ref=off (2018 TO MAR 07\020218\013118\_4PF3-PH7-13CBTNAC\_5.D)

| Peak # | Time [min] | Type | Area [mAU*s] | Height [mAU] | Width [min] | Start [min] | End [min] |
|--------|------------|------|--------------|--------------|-------------|-------------|-----------|
| 1      | 8.962      | MF   | 886.41290    | 200.69423    | 0.0736      | 8.893       | 9.051     |
| 2      | 9.162      | MF   | 1947.91333   | 281.73981    | 0.1152      | 9.051       | 9.282     |
| 3      | 9.675      | MF   | 2469.42773   | 342.71152    | 0.1201      | 9.546       | 9.816     |
| 4      | 12.781     | MF   | 429.56952    | 78.42221     | 0.0913      | 12.687      | 12.873    |

## LC-MS spectra (compound purity)

All extracted mass ions correspond to  $[M + H]^+$  or  $[M - H]^-$  for the given compound unless labeled otherwise.

|           |                                                                                        |
|-----------|----------------------------------------------------------------------------------------|
| S63-S64   | CBTNAc (1)                                                                             |
| S65-S66   | CIBTNAc (2)                                                                            |
| S67-S68   | <sup>13</sup> CBTNAc (3)                                                               |
| S69-S70   | CBTag 1.0 (4)                                                                          |
| S71-S72   | PEP-FOLD-4 (5)                                                                         |
| S73       | Blank (no injection) – background noise (MS+) in spectra for compounds 6-21            |
| S74-S105  | PEP-FOLD-1, -2, -5, -6, -7, -8, -9, -11, -12, -13, -14, -15, -16, -17, -18, -19 (6-21) |
| S106-S107 | CBTag 1.0 (K9R) (22)                                                                   |
| S108-S109 | CBTag 1.0 (C7S) (23)                                                                   |
| S110-S111 | CBTag 1.0- <sup>13</sup> CBTNAc (amidine) (24)                                         |

# CBTNAc (1)

Data File C:\CHEM32\1\DATA\2018 TO MAR 07\030718\_CBTNAC\_LC.D

Sample Name: 030718\_CBTNAC\_LC

=====

|                                    |                       |
|------------------------------------|-----------------------|
| Acq. Operator : SGLK               | Seq. Line : 5         |
| Acq. Instrument : Instrument 1     | Location : Vial 13    |
| Injection Date : 3/7/18 3:16:46 PM | Inj : 1               |
|                                    | Inj Volume : 1.000 µl |

Different Inj Volume from Sequence ! Actual Inj Volume : 5.000 µl

Acq. Method : D:\CHEM32\1\METHODS\AP\_C18\_INSERT.M

Last changed : 3/2/18 3:32:17 PM by CLM

Analysis Method : Z:\DESKTOP\BERTOZZI LAB\LCMS INFO\LCMS METHODS TO 112917\SGLK\_BERTOZZIBP\_WITHINSERT.M

Last changed : 3/6/18 6:13:20 PM

(modified after loading)

Additional Info : Peak(s) manually integrated

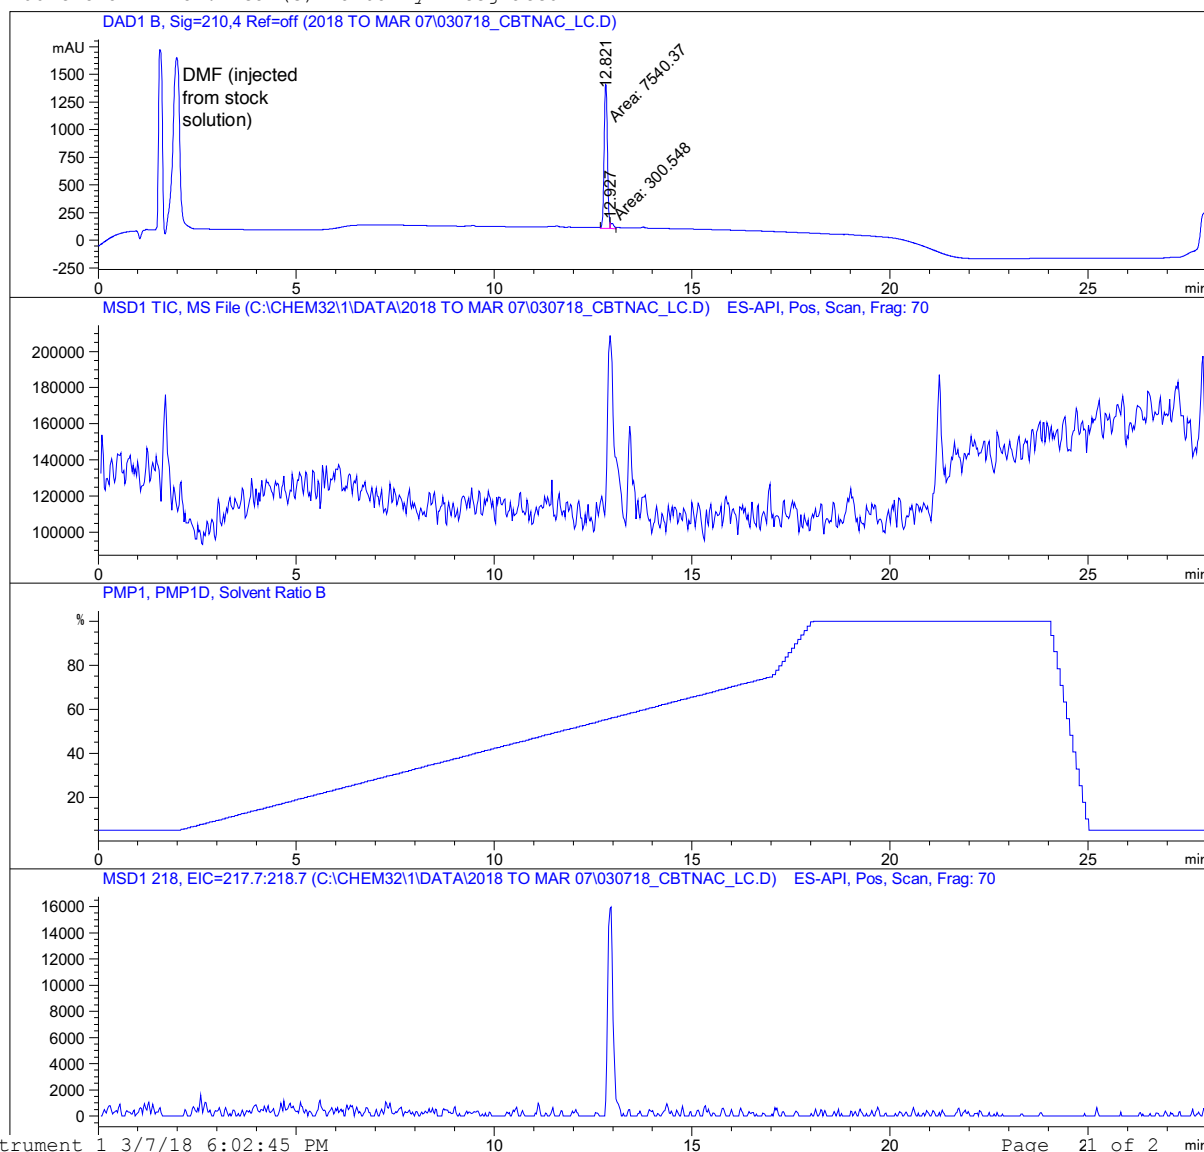

Data File C:\CHEM32\1\DATA\2018 TO MAR 07\030718\_CBTNAC\_LC.D  
Sample Name: 030718\_CBTNac\_LC

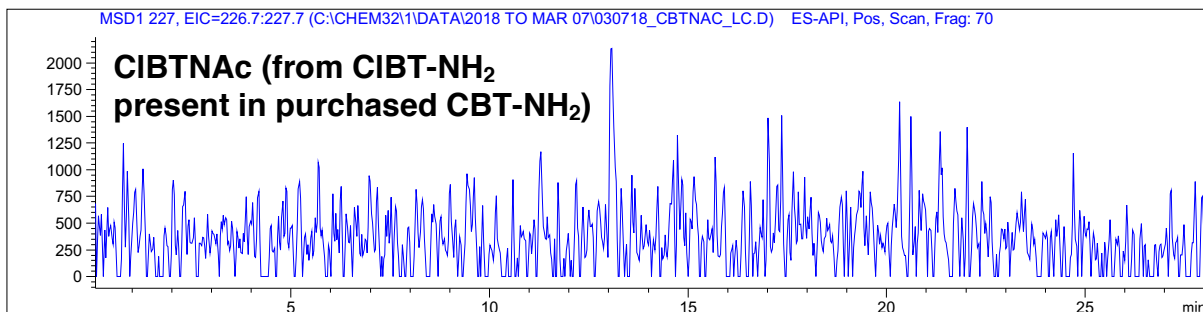

=====  
Area Percent Report  
=====

Sorted By : Signal  
Multiplier: : 1.0000  
Dilution: : 1.0000  
Do not use Multiplier & Dilution Factor with ISTDs

Signal 1: DAD1 B, Sig=210,4 Ref=off

| Peak # | RetTime [min] | Type | Width [min] | Area [mAU*s] | Height [mAU] | Area %  |
|--------|---------------|------|-------------|--------------|--------------|---------|
| 1      | 12.821        | MF   | 0.0964      | 7540.36719   | 1303.94641   | 96.1669 |
| 2      | 12.927        | FM   | 0.0870      | 300.54807    | 49.86433     | 3.8331  |

Totals : 7840.91525 1353.81074

Signal 2: MSD1 TIC, MS File

=====  
\*\*\* End of Report \*\*\*



# CIBTNAC (2)

Data File C:\CHEM32\1\DATA\2018 TO MAR 07\030718\_CLBTNAC\_LC-LESS.D

Sample Name: 030718\_C1BTNAC\_LC-less

```
=====
Acq. Operator   : SGLK                               Seq. Line :    4
Acq. Instrument : Instrument 1                       Location  : Vial 11
Injection Date  : 3/7/18 2:47:36 PM                 Inj       :    1
                                                    Inj Volume: 1.000 µl
Different Inj Volume from Sequence !   Actual Inj Volume : 5.000 µl
Acq. Method    : D:\CHEM32\1\METHODS\AP_C18_INSERT.M
Last changed   : 3/2/18 3:32:17 PM by CLM
Analysis Method : Z:\DESKTOP\BERTOZZI LAB\LCMS INFO\LCMS METHODS TO 112917\SGLK_BERTOZZIBP_
                WITHINSERT.M
Last changed   : 3/6/18 6:13:20 PM
                (modified after loading)
Additional Info : Peak(s) manually integrated
=====
```

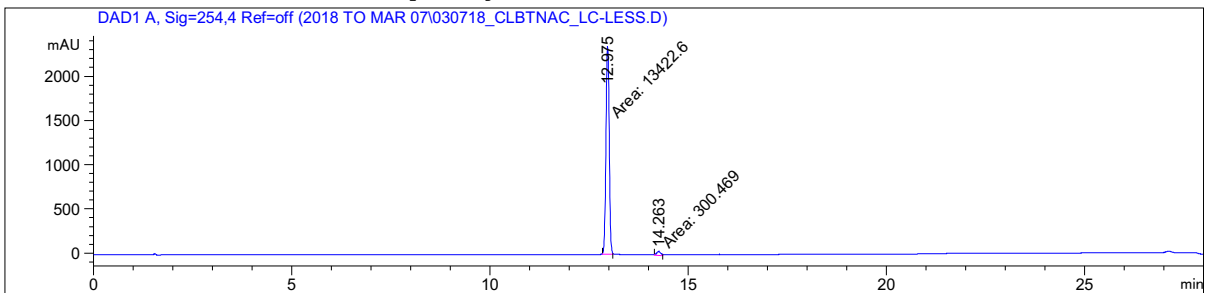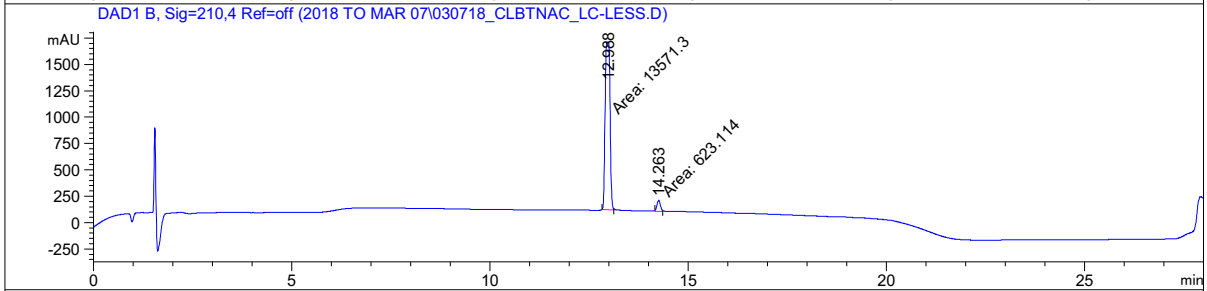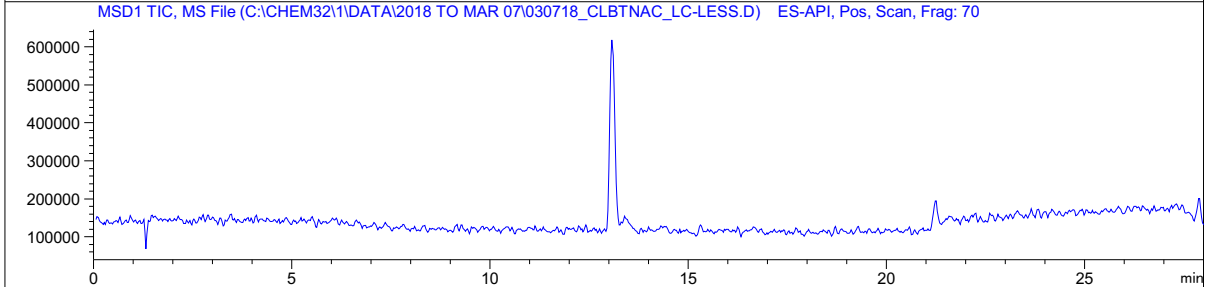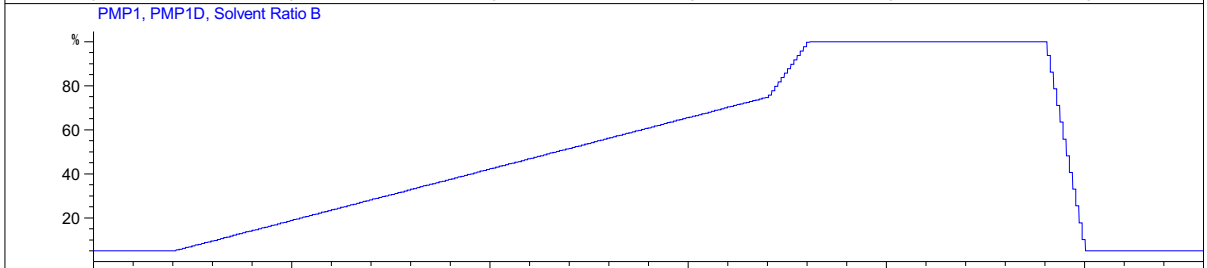

Instrument 1 3/7/18 5:48:01 PM Page 21 of 3 min

Data File C:\CHEM32\1\DATA\2018 TO MAR 07\030718\_CLBTNAC\_LC-LESS.D  
 Sample Name: 030718\_ClBTNac\_LC-less

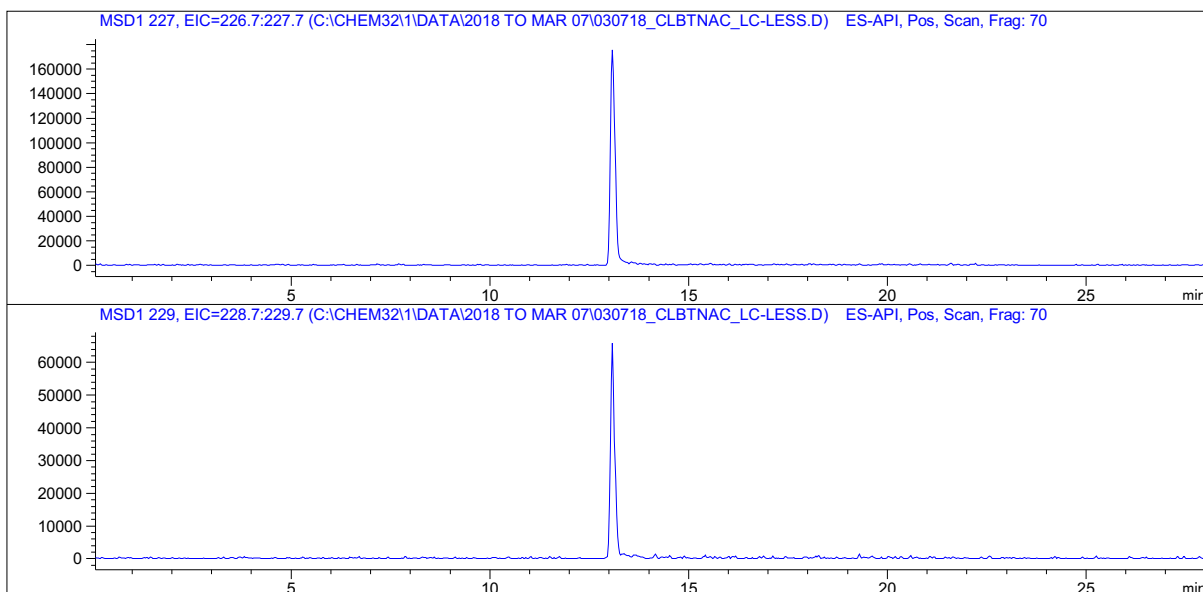

=====  
 Area Percent Report  
 =====

Sorted By : Signal  
 Multiplier: : 1.0000  
 Dilution: : 1.0000  
 Do not use Multiplier & Dilution Factor with ISTDs

Signal 1: DAD1 A, Sig=254,4 Ref=off

| Peak # | RetTime [min] | Type | Width [min] | Area [mAU*s] | Height [mAU] | Area %  |
|--------|---------------|------|-------------|--------------|--------------|---------|
| 1      | 12.975        | MM   | 0.0949      | 1.34226e4    | 2356.18262   | 97.8105 |
| 2      | 14.263        | MM   | 0.1172      | 300.46902    | 42.71576     | 2.1895  |

Totals : 1.37231e4 2398.89838

Signal 2: DAD1 B, Sig=210,4 Ref=off

| Peak # | RetTime [min] | Type | Width [min] | Area [mAU*s] | Height [mAU] | Area %  |
|--------|---------------|------|-------------|--------------|--------------|---------|
| 1      | 12.988        | MM   | 0.1422      | 1.35713e4    | 1591.18579   | 95.6102 |
| 2      | 14.263        | MM   | 0.0988      | 623.11401    | 105.09184    | 4.3898  |

Totals : 1.41944e4 1696.27763

Signal 3: MSD1 TIC, MS File

# 13CBTNAC (3)

Data File C:\CHEM32\1\DATA\2018 TO MAR 07\030718\_13CBTNAC\_LC.D  
Sample Name: 030718\_13CBTNAC\_LC

```
=====
Acq. Operator   : SGLK                      Seq. Line :    2
Acq. Instrument : INSTRUMENT 1              Location  : Vial 12
Injection Date  : 3/7/18 1:49:08 PM         Inj       :    1
                                                Inj Volume: 1.000 µl
Different Inj Volume from Sequence !      Actual Inj Volume : 5.000 µl
Acq. Method     : D:\CHEM32\1\METHODS\AP_C18_INSERT.M
Last changed    : 3/2/18 3:32:17 PM by CLM
Analysis Method : Z:\DESKTOP\BERTOZZI LAB\LCMS INFO\LCMS METHODS TO 112917\SGLK_BERTOZZIBP_
                WITHINSERT.M
Last changed    : 3/6/18 6:13:20 PM
                (modified after loading)
Additional Info  : Peak(s) manually integrated
=====
```

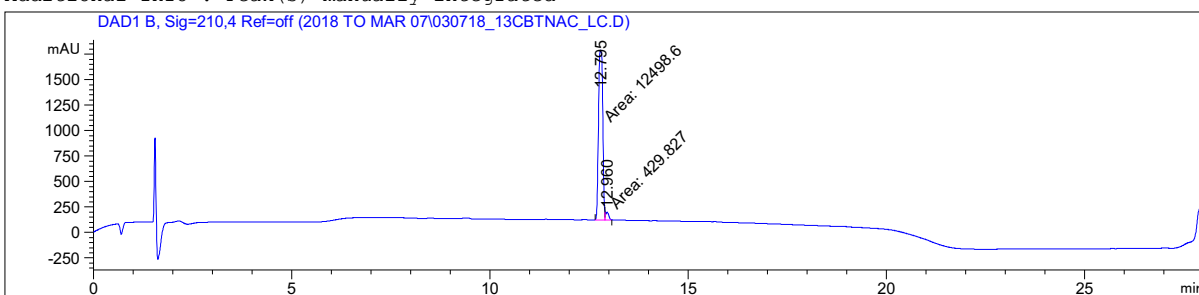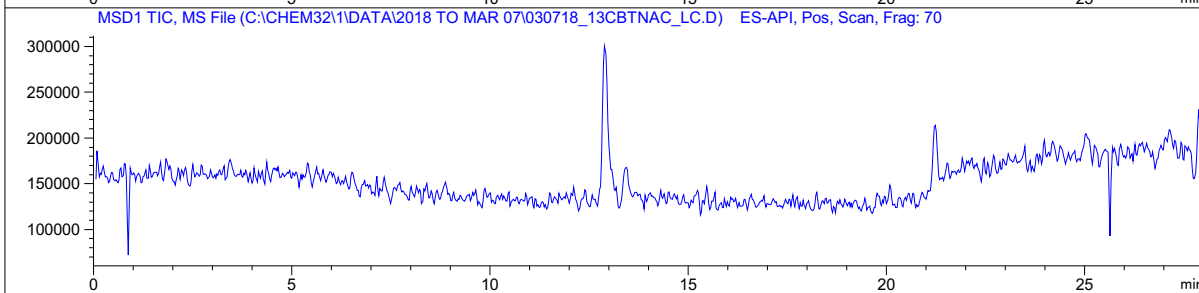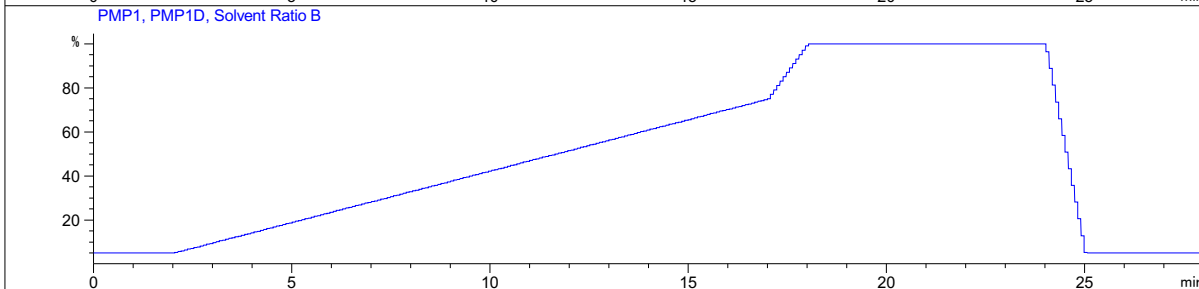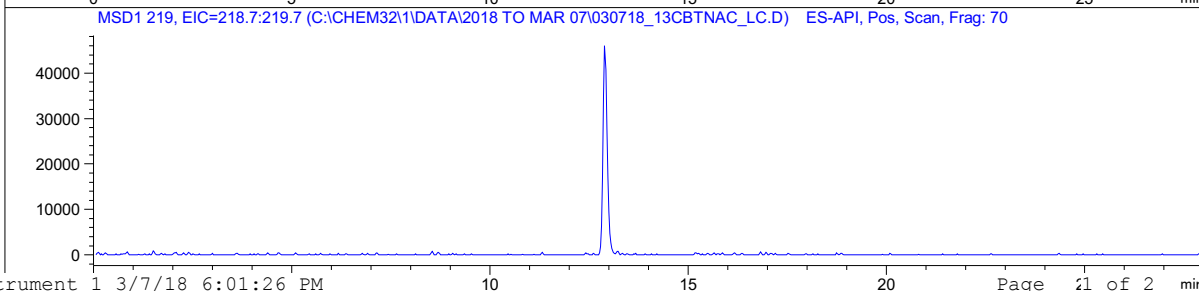

Data File C:\CHEM32\1\DATA\2018 TO MAR 07\030718\_13CBTNAC\_LC.D  
Sample Name: 030718\_13CBTNAC\_LC

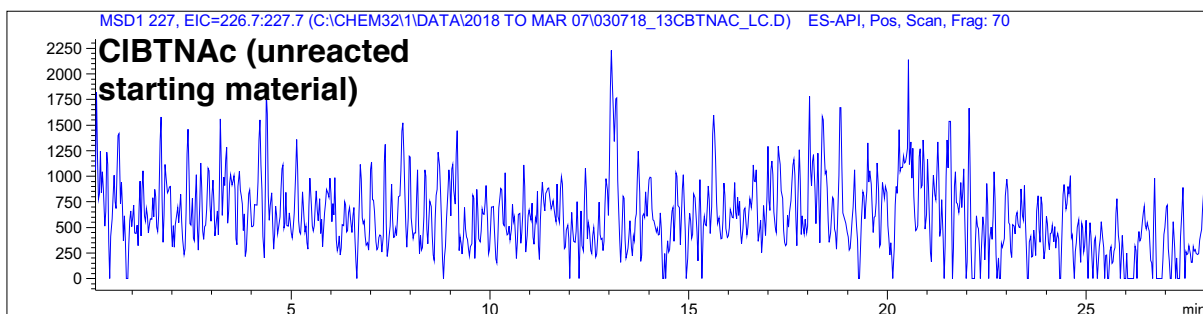

=====  
Area Percent Report  
=====

Sorted By : Signal  
Multiplier: : 1.0000  
Dilution: : 1.0000  
Do not use Multiplier & Dilution Factor with ISTDs

Signal 1: DAD1 B, Sig=210,4 Ref=off

| Peak # | RetTime [min] | Type | Width [min] | Area [mAU*s] | Height [mAU] | Area %  |
|--------|---------------|------|-------------|--------------|--------------|---------|
| 1      | 12.795        | MF   | 0.1249      | 1.24986e4    | 1667.93628   | 96.6753 |
| 2      | 12.960        | FM   | 0.0927      | 429.82697    | 77.28518     | 3.3247  |

Totals : 1.29285e4 1745.22146

Signal 2: MSD1 TIC, MS File

=====  
\*\*\* End of Report \*\*\*

# CBTag 1.0, Ac-GGHPDPCPKGG-NH<sub>2</sub> (4)

Acq. Method : D:\CHEM32\1\METHODS\SGLK\_BERTOZZILC\_PEP

Inj Volume : 25.000 µl

Additional Info : Peak(s) manually integrated

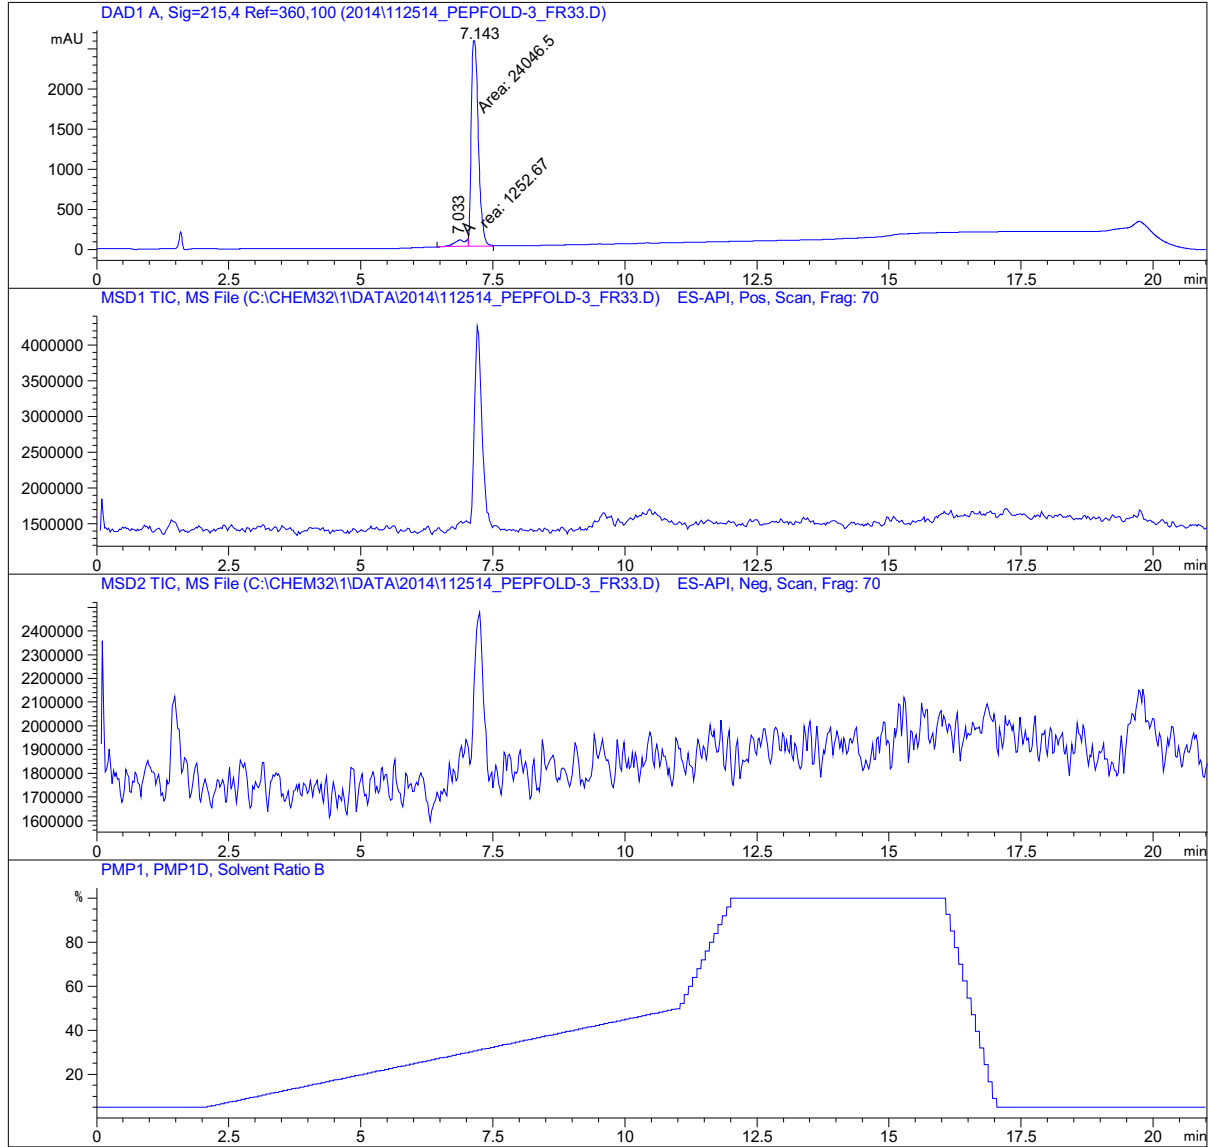

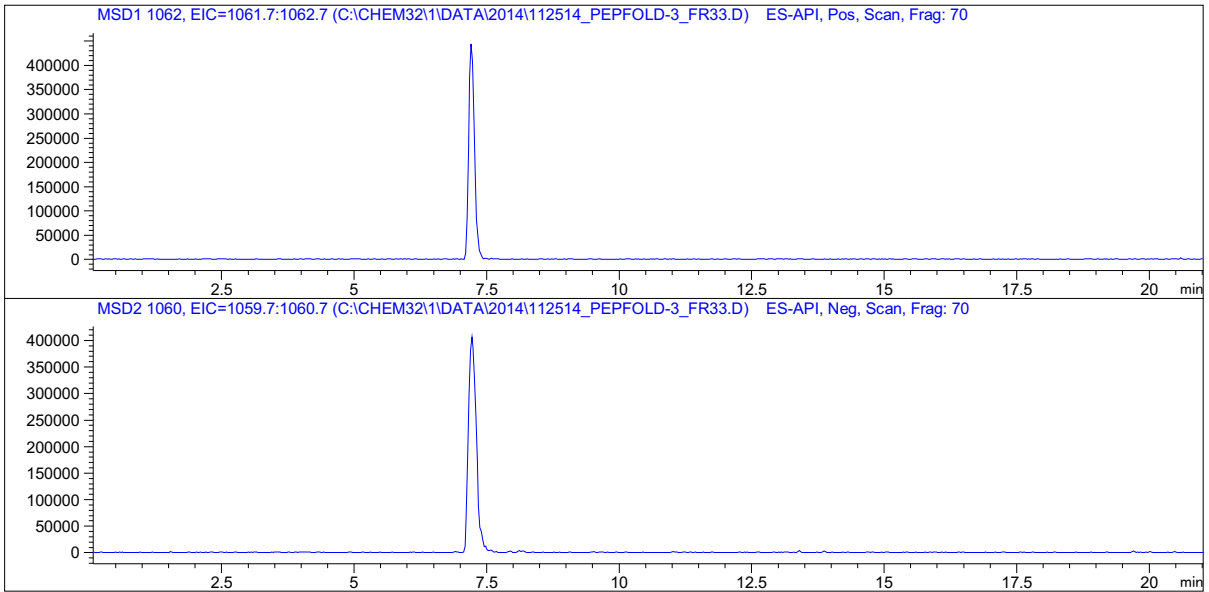

=====  
 Area Percent Report  
 =====

Signal 1: DAD1 A, Sig=215,4 Ref=360,100

| Peak # | RetTime [min] | Type | Width [min] | Area [mAU*s] | Height [mAU] | Area %  |
|--------|---------------|------|-------------|--------------|--------------|---------|
| 1      | 7.033         | MF   | 0.2265      | 1252.66980   | 92.18911     | 4.9514  |
| 2      | 7.143         | FM   | 0.1564      | 2.40465e4    | 2562.40234   | 95.0486 |

Totals :                    2.52992e4  2654.59145

# PEP-FOLD-4, Ac-GGDPHPCKGG-NH<sub>2</sub> (5)

Data File C:\CHEM32\1\DATA\2014\112514\_PEPFOLD-4\_FR42.D  
Sample Name: 112514\_PEPFOLD-4\_fr42

```
=====
Acq. Operator   : EM                               Seq. Line :    4
Acq. Instrument : Instrument 1                     Location  : Vial 77
Injection Date  : 11/25/14 4:55:14 PM             Inj       :    1
                                                    Inj Volume: 25.000 µl

Acq. Method     : D:\CHEM32\1\METHODS\SGLK_BERTOZZILC_PEP
Last changed    : 11/25/14 3:41:49 PM by EM
Analysis Method : Z:\DESKTOP\BERTOZZI LAB\LCMS INFO\LCMS METHODS TO 112917\SGLK_BERTOZZIBP_
                WITHINSERT.M
Last changed    : 2/7/18 7:43:15 PM
                (modified after loading)
Additional Info : Peak(s) manually integrated
=====
```

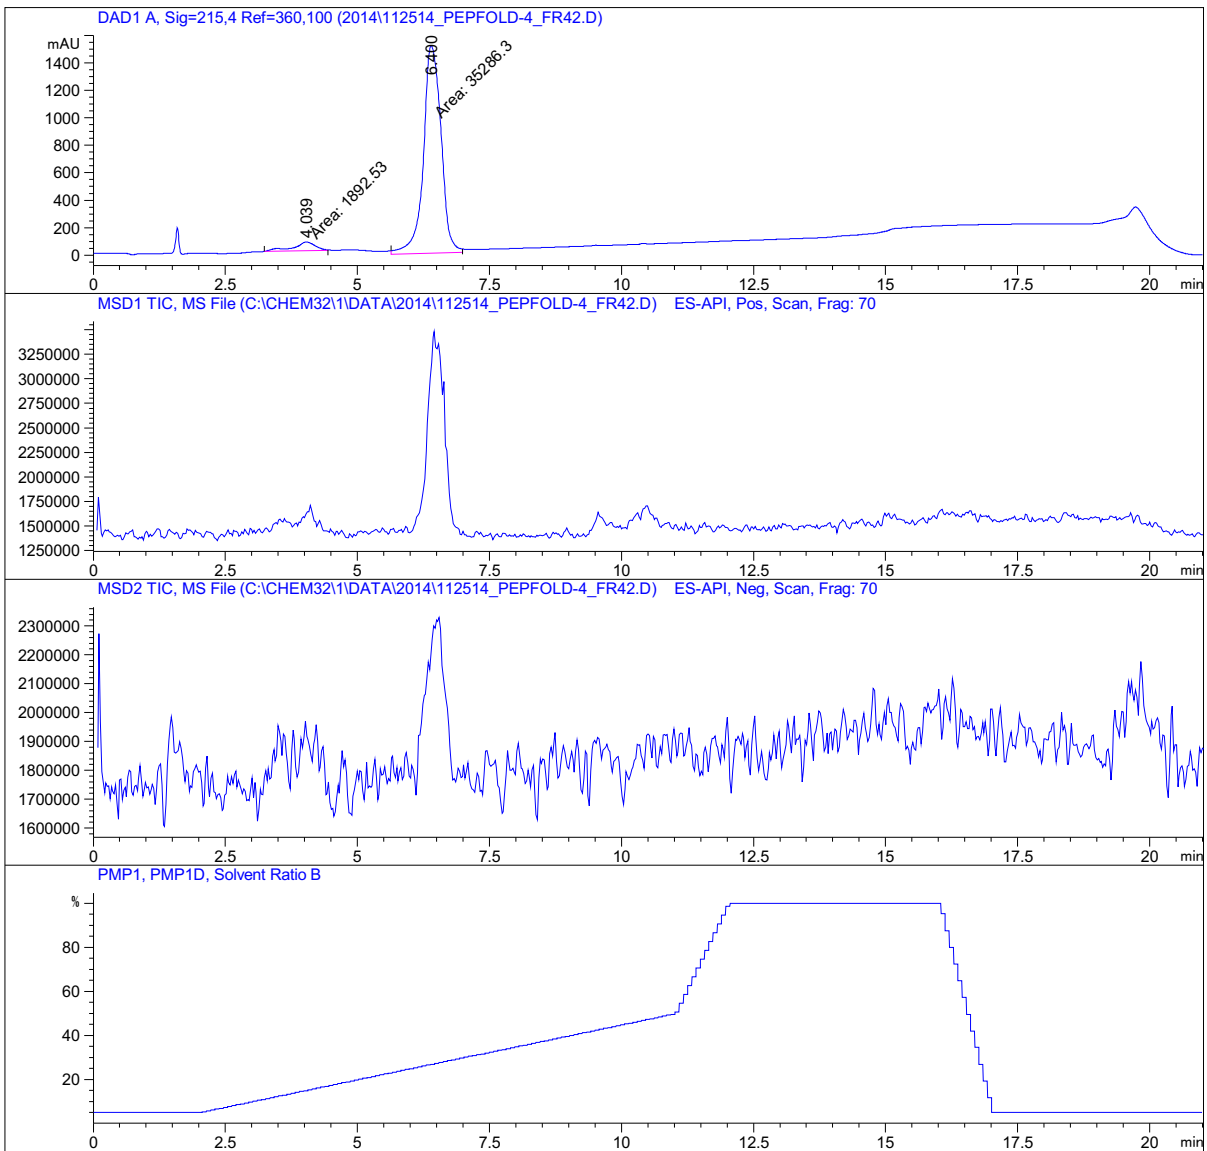

Instrument 1 2/7/18 7:51:10 PM

Page 1 of 3

Data File C:\CHEM32\1\DATA\2014\112514\_PEPFOLD-4\_FR42.D  
Sample Name: 112514\_PEPFOLD-4\_fr42

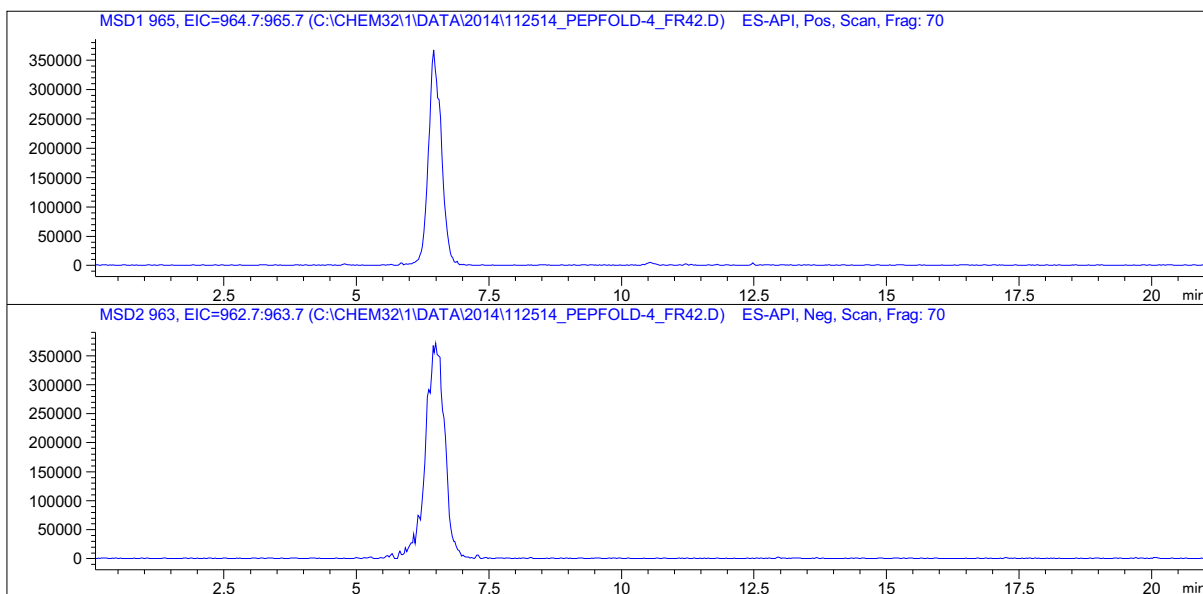

=====  
Area Percent Report  
=====

Sorted By : Signal  
Multiplier: : 1.0000  
Dilution: : 1.0000  
Do not use Multiplier & Dilution Factor with ISTDs

Signal 1: DAD1 A, Sig=215,4 Ref=360,100

| Peak # | RetTime [min] | Type | Width [min] | Area [mAU*s] | Height [mAU] | Area %  |
|--------|---------------|------|-------------|--------------|--------------|---------|
| 1      | 4.039         | MM   | 0.4972      | 1892.52612   | 63.43561     | 5.0903  |
| 2      | 6.400         | MM   | 0.3892      | 3.52863e4    | 1511.20435   | 94.9097 |

Totals : 3.71788e4 1574.63995

Signal 2: MSD1 TIC, MS File



# Blank (no injection) – background MS peaks for compounds 6-21

Data File C:\CHEM32\1\DATA\2018 TO APR 20\041718\_NOINJ-LAST.D  
Sample Name: 041718\_noinj-last

```
=====
Acq. Operator   : SGLK                               Seq. Line : 21
Acq. Instrument : Instrument 1                       Location  : Vial 80
Injection Date  : 4/17/18 9:15:18 PM                Inj       : 1
                                                    Inj Volume: 1.000 µl
Different Inj Volume from Sequence !   Actual Inj Volume : 0.000 µl
Acq. Method     : D:\CHEM32\1\METHODS\AP_C18_INSERT.M
Last changed    : 4/17/18 11:25:09 AM by SGLK
Analysis Method : Z:\DESKTOP\BERTOZZI LAB\LCMS INFO\LCMS METHODS TO 112917\SGLK_BERTOZZIBP_
                WITHINSERT.M
Last changed    : 4/26/18 12:19:51 PM
                (modified after loading)
Additional Info : Peak(s) manually integrated
=====
```

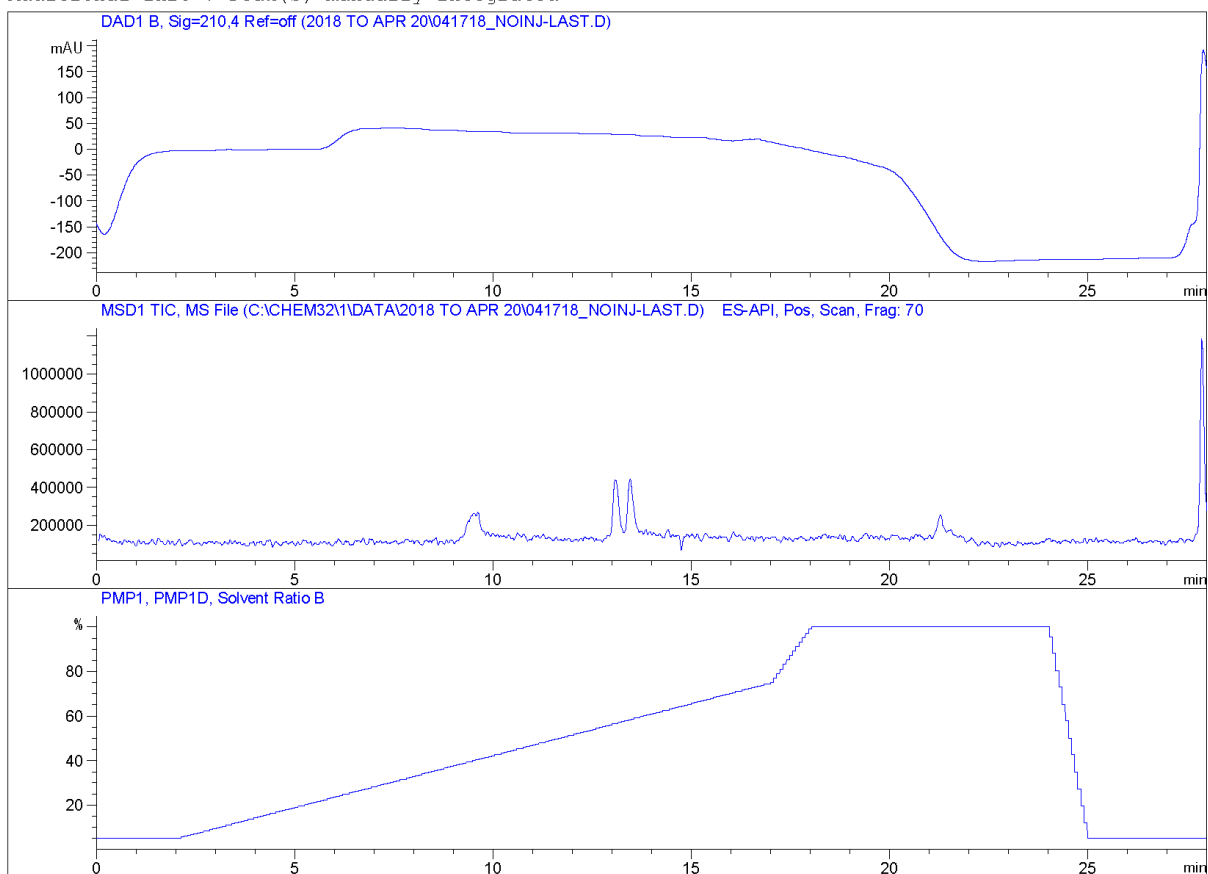

# PEP-FOLD-1, Ac-GGDPCPHPKGG-NH<sub>2</sub> (6)

Data File C:\CHEM32\1\DATA\2018 TO APR 20\041718\_PEPFOLD-1.D  
Sample Name: 041718\_pepfold-1

```
=====
Acq. Operator   : SGLK                      Seq. Line :    1
Acq. Instrument : Instrument 1              Location  : Vial 61
Injection Date  : 4/17/18 11:30:06 AM      Inj       :    1
                                                Inj Volume: 1.000 µl
Different Inj Volume from Sequence !      Actual Inj Volume : 2.000 µl
Acq. Method     : D:\CHEM32\1\METHODS\AP_C18_INSERT.M
Last changed    : 4/17/18 11:25:09 AM by SGLK
Analysis Method : Z:\DESKTOP\BERTOZZI LAB\LCMS INFO\LCMS METHODS TO 112917\SGLK_BERTOZZIBP_
                WITHINSERT.M
Last changed    : 4/26/18 11:40:30 AM
                (modified after loading)
Additional Info : Peak(s) manually integrated
=====
```

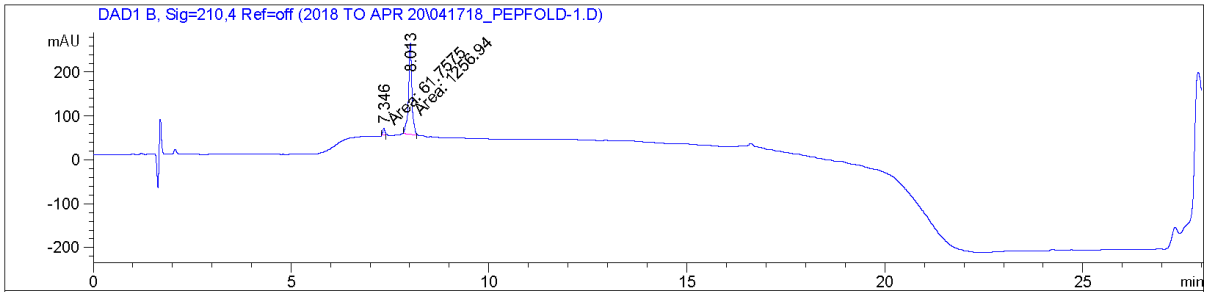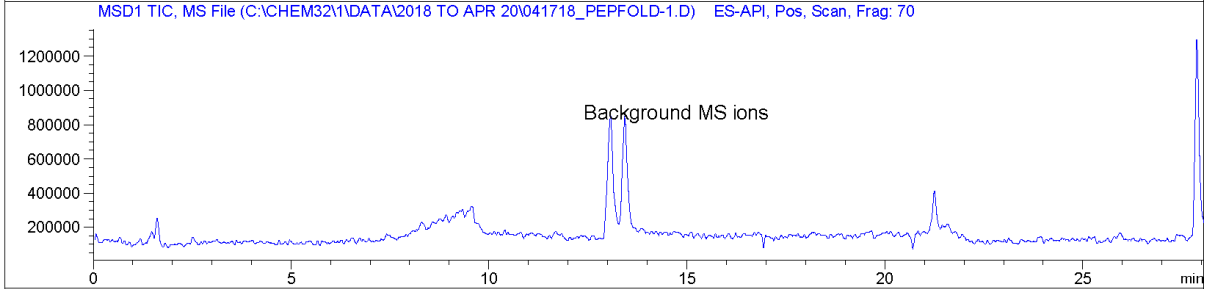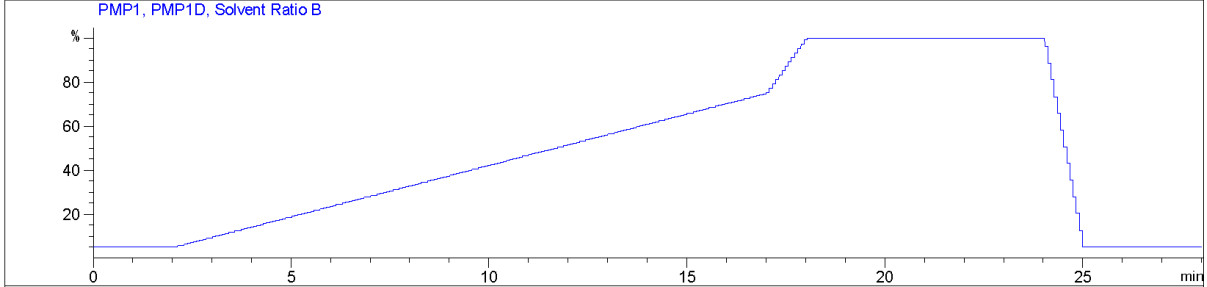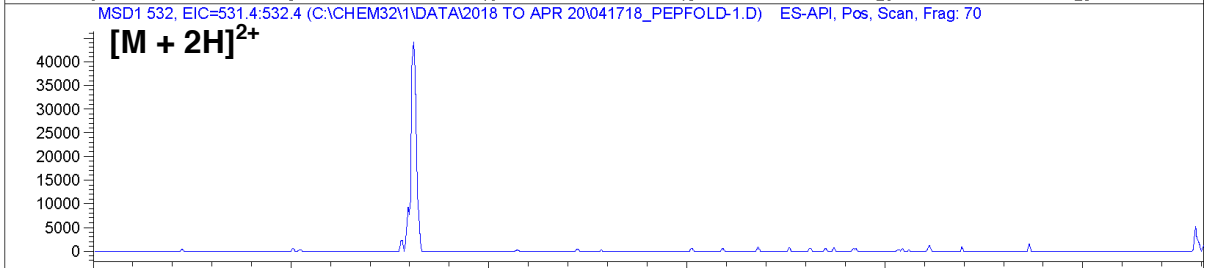

Instrument 1 4/26/18 11:48:23 AM Page 21 of 2

Data File C:\CHEM32\1\DATA\2018 TO APR 20\041718\_PEPFOLD-1.D  
Sample Name: 041718\_pepfold-1

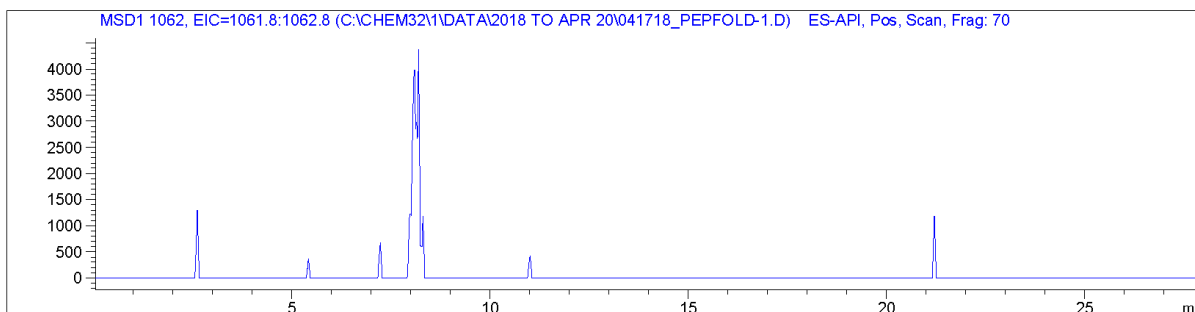

=====  
Area Percent Report  
=====

Sorted By : Signal  
Multiplier: : 1.0000  
Dilution: : 1.0000  
Do not use Multiplier & Dilution Factor with ISTDs

Signal 1: DAD1 B, Sig=210,4 Ref=off

| Peak # | RetTime [min] | Type | Width [min] | Area [mAU*s] | Height [mAU] | Area %  |
|--------|---------------|------|-------------|--------------|--------------|---------|
| 1      | 7.346         | MM   | 0.0631      | 61.75753     | 16.30812     | 4.6832  |
| 2      | 8.013         | MM   | 0.1000      | 1256.93677   | 209.44200    | 95.3168 |

Totals : 1318.69430 225.75012

Signal 2: MSD1 TIC, MS File

Signal 3: MSD1 532, EIC=531.4:532.4

Signal 4: MSD1 1062, EIC=1061.8:1062.8

=====  
\*\*\* End of Report \*\*\*

# PEP-FOLD-2, Ac-GGHPDCPKGG-NH<sub>2</sub> (7)

Data File C:\CHEM32\1\DATA\2018 TO APR 20\041718\_PEPFOLD-2.D  
Sample Name: 041718\_pepfold-2

```
=====
Acq. Operator   : SGLK                      Seq. Line :    2
Acq. Instrument : Instrument 1              Location  : Vial 62
Injection Date  : 4/17/18 11:59:24 AM      Inj       :    1
                                                Inj Volume: 1.000 µl
Different Inj Volume from Sequence !      Actual Inj Volume : 2.000 µl
Acq. Method     : D:\CHEM32\1\METHODS\AP_C18_INSERT.M
Last changed    : 4/17/18 11:25:09 AM by SGLK
Analysis Method : Z:\DESKTOP\BERTOZZI LAB\LCMS INFO\LCMS METHODS TO 112917\SGLK_BERTOZZIBP_
                WITHINSERT.M
Last changed    : 4/26/18 11:40:30 AM
                (modified after loading)
Additional Info : Peak(s) manually integrated
=====
```

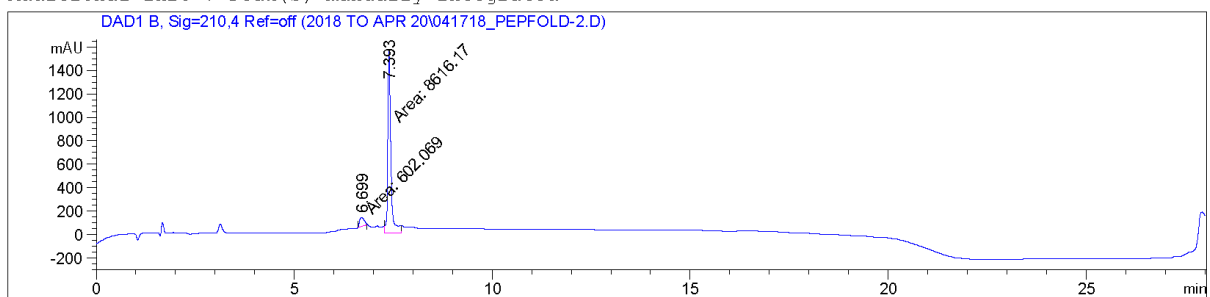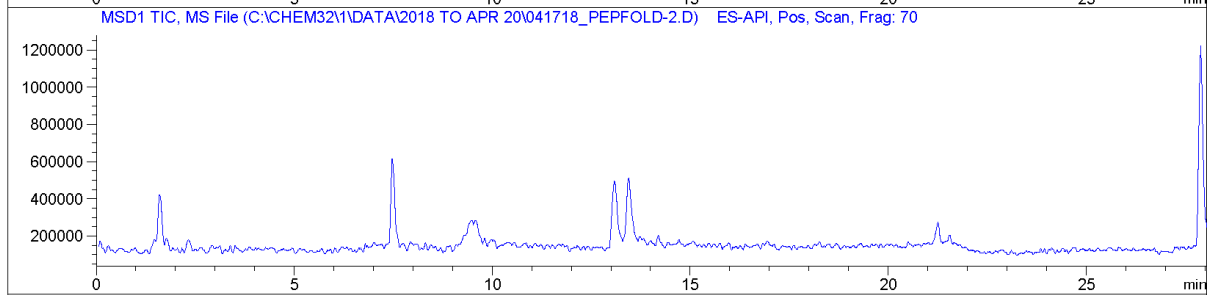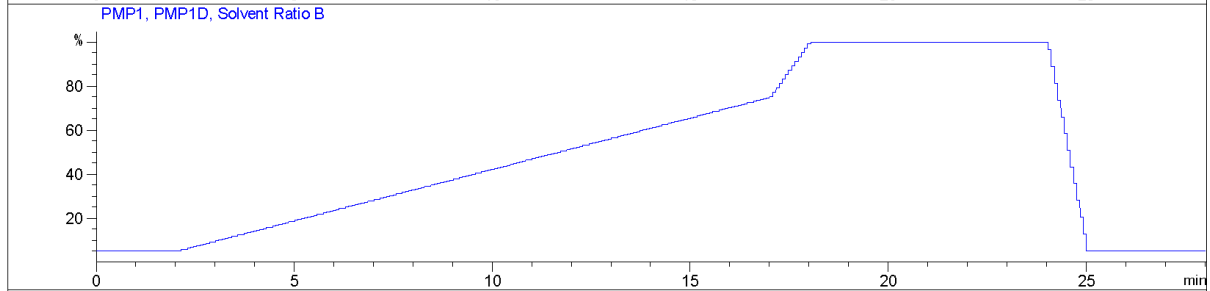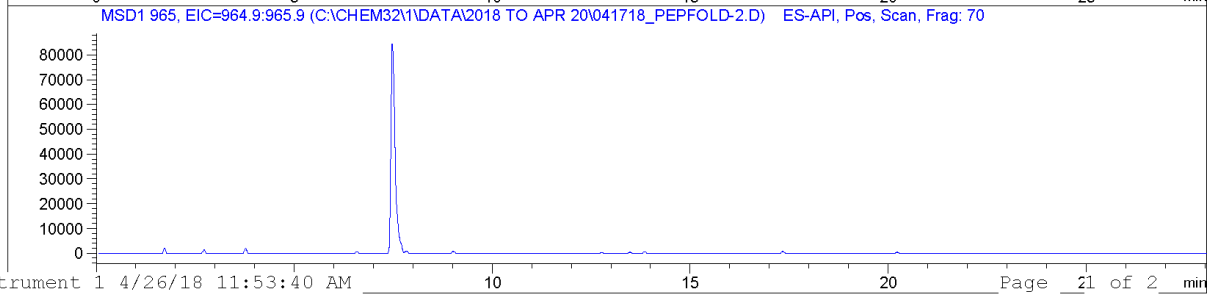

Instrument 1 4/26/18 11:53:40 AM Page 21 of 2 min

Data File C:\CHEM32\1\DATA\2018 TO APR 20\041718\_PEPFOLD-2.D  
Sample Name: 041718\_pepfold-2

=====  
Area Percent Report  
=====

Sorted By : Signal  
Multiplier: : 1.0000  
Dilution: : 1.0000  
Do not use Multiplier & Dilution Factor with ISTDs

Signal 1: DAD1 B, Sig=210,4 Ref=off

| Peak # | RetTime [min] | Type | Width [min] | Area [mAU*s] | Height [mAU] | Area %  |
|--------|---------------|------|-------------|--------------|--------------|---------|
| 1      | 6.699         | MM   | 0.1309      | 602.06927    | 76.66061     | 6.5313  |
| 2      | 7.393         | MM   | 0.0916      | 8616.17383   | 1568.30005   | 93.4687 |

Totals : 9218.24310 1644.96066

Signal 2: MSD1 TIC, MS File

Signal 3: MSD1 965, EIC=964.9:965.9

=====  
\*\*\* End of Report \*\*\*

# PEP-FOLD-5, Ac-GGHPEPCPKGG-NH<sub>2</sub> (8)

Data File C:\CHEM32\1\DATA\2018 TO APR 20\041718\_PEPFOLD-5.D  
Sample Name: 041718\_pepfold-5

=====

|                 |                      |            |            |
|-----------------|----------------------|------------|------------|
| Acq. Operator   | : SGLK               | Seq. Line  | : 5        |
| Acq. Instrument | : Instrument 1       | Location   | : Vial 65  |
| Injection Date  | : 4/17/18 1:27:08 PM | Inj        | : 1        |
|                 |                      | Inj Volume | : 1.000 µl |

Different Inj Volume from Sequence ! Actual Inj Volume : 2.000 µl

|                 |                                                                                         |
|-----------------|-----------------------------------------------------------------------------------------|
| Acq. Method     | : D:\CHEM32\1\METHODS\AP_C18_INSERT.M                                                   |
| Last changed    | : 4/17/18 11:25:09 AM by SGLK                                                           |
| Analysis Method | : Z:\DESKTOP\BERTOZZI LAB\LCMS INFO\LCMS METHODS TO 112917\SGLK_BERTOZZIBP_WITHINSERT.M |
| Last changed    | : 4/26/18 11:40:30 AM<br>(modified after loading)                                       |

Additional Info : Peak(s) manually integrated

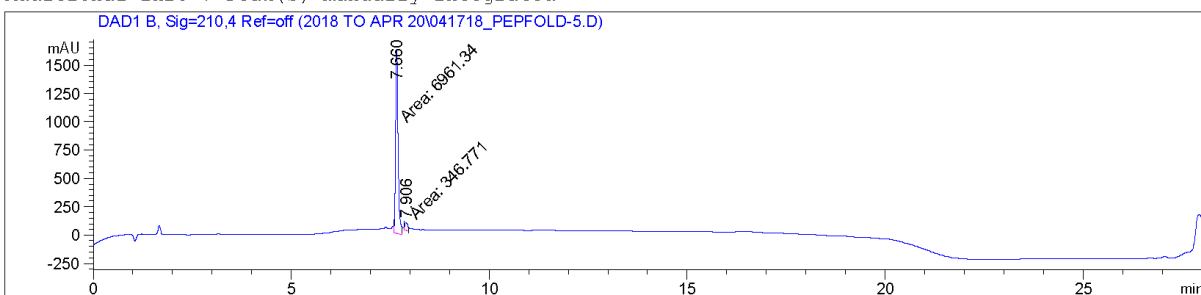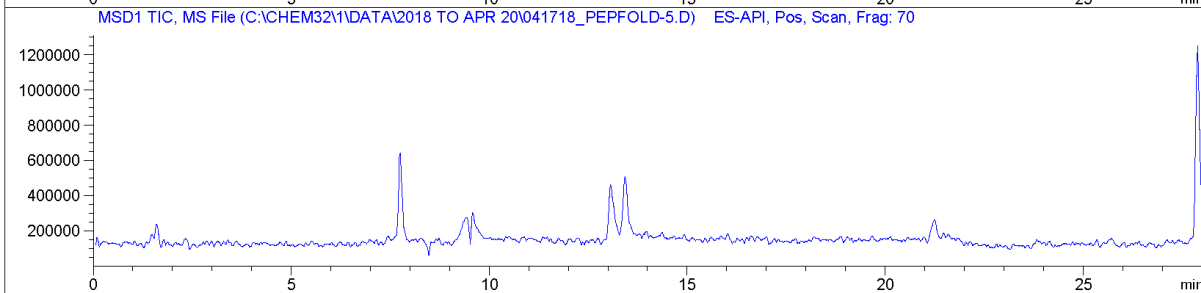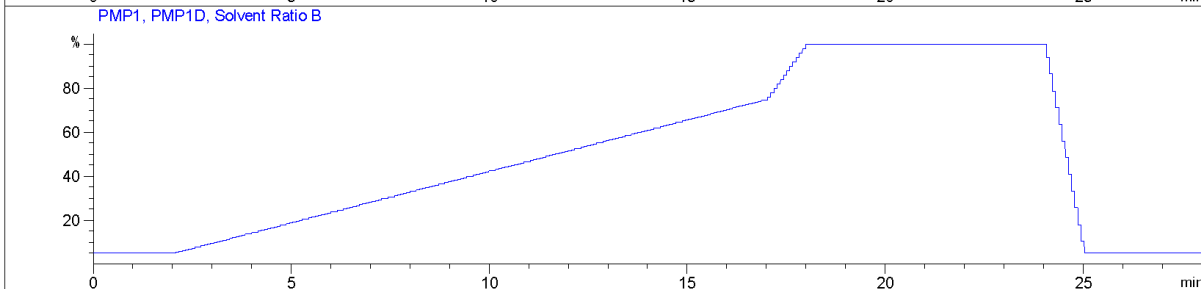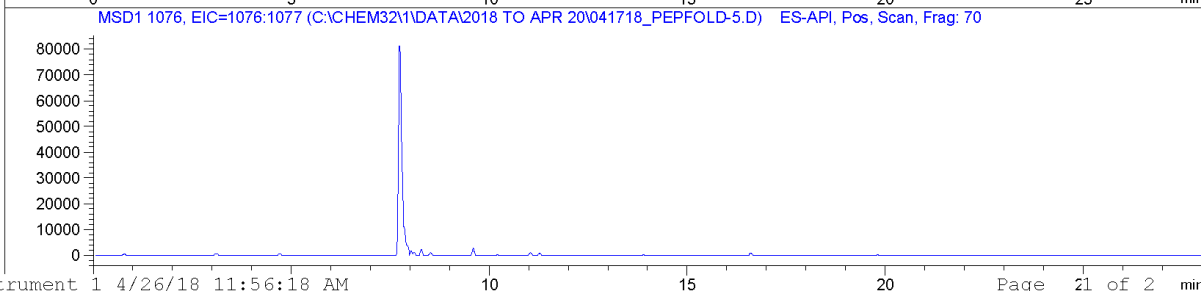

Data File C:\CHEM32\1\DATA\2018 TO APR 20\041718\_PEPFOLD-5.D  
Sample Name: 041718\_pepfold-5

=====  
Area Percent Report  
=====

Sorted By : Signal  
Multiplier: : 1.0000  
Dilution: : 1.0000  
Do not use Multiplier & Dilution Factor with ISTDs

Signal 1: DAD1 B, Sig=210,4 Ref=off

| Peak # | RetTime [min] | Type | Width [min] | Area [mAU*s] | Height [mAU] | Area %  |
|--------|---------------|------|-------------|--------------|--------------|---------|
| 1      | 7.660         | MM   | 0.0715      | 6961.34277   | 1623.41699   | 95.2550 |
| 2      | 7.906         | MM   | 0.0808      | 346.77087    | 71.53614     | 4.7450  |

Totals : 7308.11365 1694.95313

Signal 2: MSD1 TIC, MS File

Signal 3: MSD1 1076, EIC=1076:1077

=====  
\*\*\* End of Report \*\*\*

# PEP-FOLD-6, Ac-GGHPECPKGG-NH<sub>2</sub> (9)

Data File C:\CHEM32\1\DATA\2018 TO APR 20\041718\_PEPFOLD-6.D  
Sample Name: 041718\_pepfold-6

=====

|                 |                      |            |            |
|-----------------|----------------------|------------|------------|
| Acq. Operator   | : SGLK               | Seq. Line  | : 6        |
| Acq. Instrument | : Instrument 1       | Location   | : Vial 66  |
| Injection Date  | : 4/17/18 1:56:26 PM | Inj        | : 1        |
|                 |                      | Inj Volume | : 1.000 µl |

Different Inj Volume from Sequence ! Actual Inj Volume : 2.000 µl

|                 |                                                                                         |
|-----------------|-----------------------------------------------------------------------------------------|
| Acq. Method     | : D:\CHEM32\1\METHODS\AP_C18_INSERT.M                                                   |
| Last changed    | : 4/17/18 11:25:09 AM by SGLK                                                           |
| Analysis Method | : Z:\DESKTOP\BERTOZZI LAB\LCMS INFO\LCMS METHODS TO 112917\SGLK_BERTOZZIBP_WITHINSERT.M |
| Last changed    | : 4/26/18 11:40:30 AM<br>(modified after loading)                                       |

Additional Info : Peak(s) manually integrated

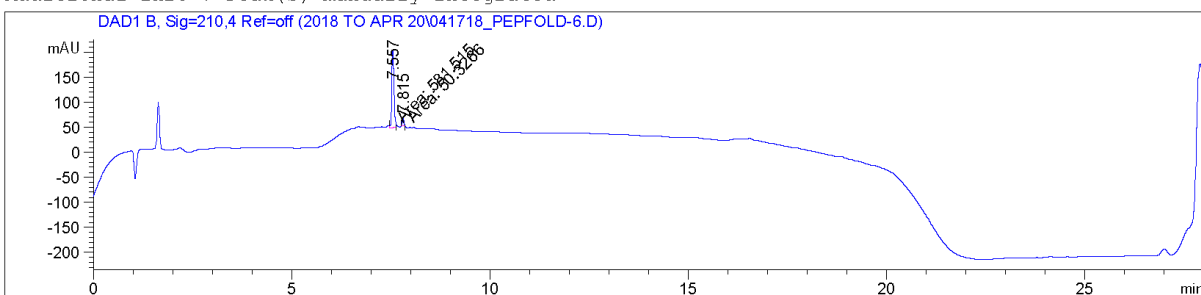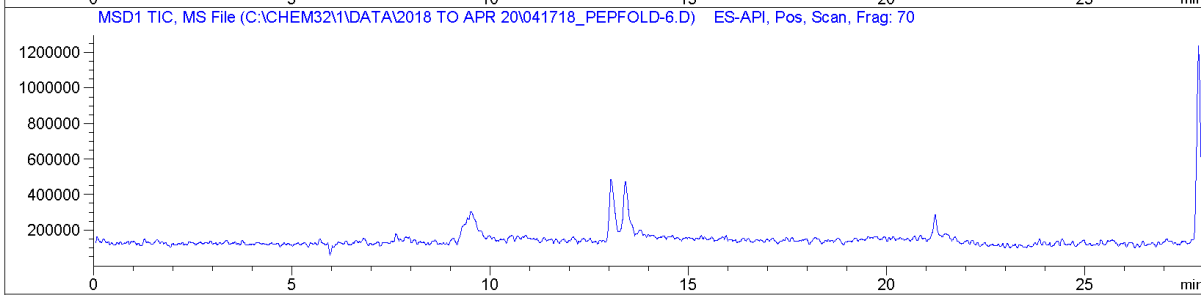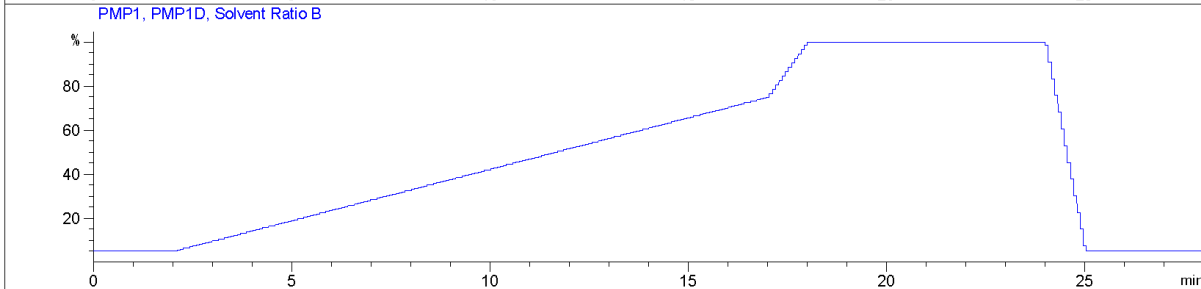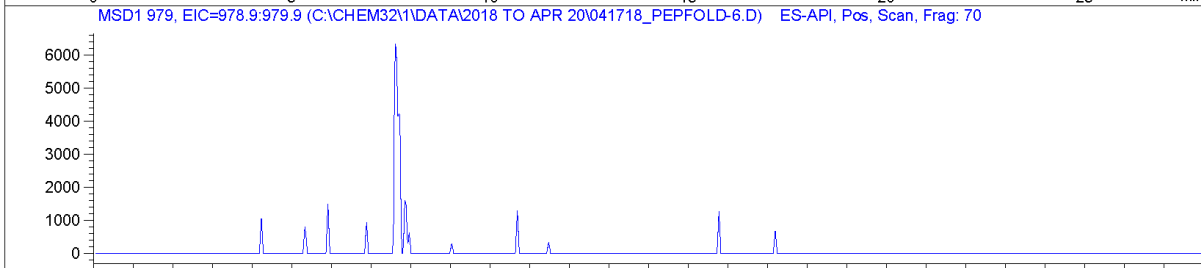



Data File C:\CHEM32\1\DATA\2018 TO APR 20\041718\_PEPFOLD-6.D  
Sample Name: 041718\_pepfold-6

=====  
Area Percent Report  
=====

Sorted By : Signal  
Multiplier: : 1.0000  
Dilution: : 1.0000  
Do not use Multiplier & Dilution Factor with ISTDs

Signal 1: DAD1 B, Sig=210,4 Ref=off

| Peak # | RetTime [min] | Type | Width [min] | Area [mAU*s] | Height [mAU] | Area %  |
|--------|---------------|------|-------------|--------------|--------------|---------|
| 1      | 7.557         | MM   | 0.0617      | 581.51514    | 157.19263    | 92.0349 |
| 2      | 7.815         | MM   | 0.0495      | 50.32655     | 16.94779     | 7.9651  |

Totals : 631.84169 174.14042

Signal 2: MSD1 TIC, MS File

=====  
\*\*\* End of Report \*\*\*

# PEP-FOLD-7, Ac-GGEPHPCPKGG-NH<sub>2</sub> (10)

Data File C:\CHEM32\1\DATA\2018 TO APR 20\041718\_PEPFOLD-7.D  
Sample Name: 041718\_pepfold-7

=====

|                 |                      |            |            |
|-----------------|----------------------|------------|------------|
| Acq. Operator   | : SGLK               | Seq. Line  | : 7        |
| Acq. Instrument | : Instrument 1       | Location   | : Vial 67  |
| Injection Date  | : 4/17/18 2:25:44 PM | Inj        | : 1        |
|                 |                      | Inj Volume | : 1.000 µl |

Different Inj Volume from Sequence ! Actual Inj Volume : 2.000 µl

|                 |                                                                                         |
|-----------------|-----------------------------------------------------------------------------------------|
| Acq. Method     | : D:\CHEM32\1\METHODS\AP_C18_INSERT.M                                                   |
| Last changed    | : 4/17/18 11:25:09 AM by SGLK                                                           |
| Analysis Method | : Z:\DESKTOP\BERTOZZI LAB\LCMS INFO\LCMS METHODS TO 112917\SGLK_BERTOZZIBP_WITHINSERT.M |
| Last changed    | : 4/26/18 11:40:30 AM<br>(modified after loading)                                       |

Additional Info : Peak(s) manually integrated

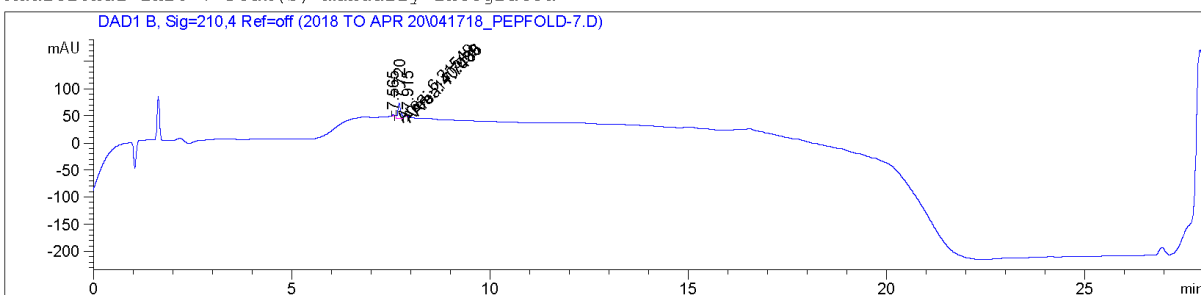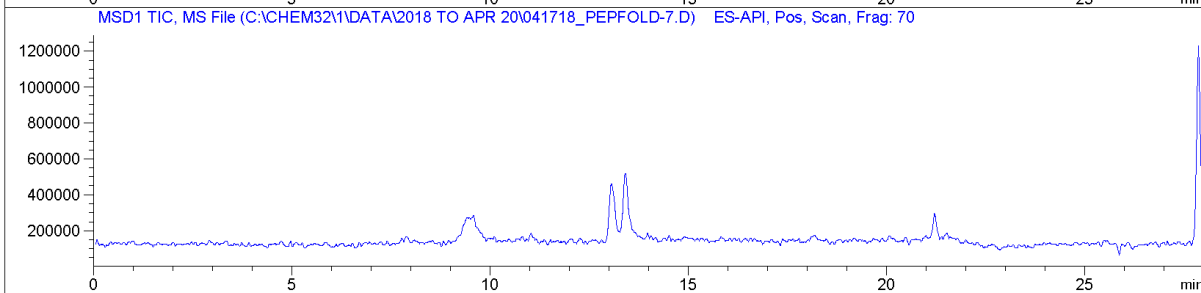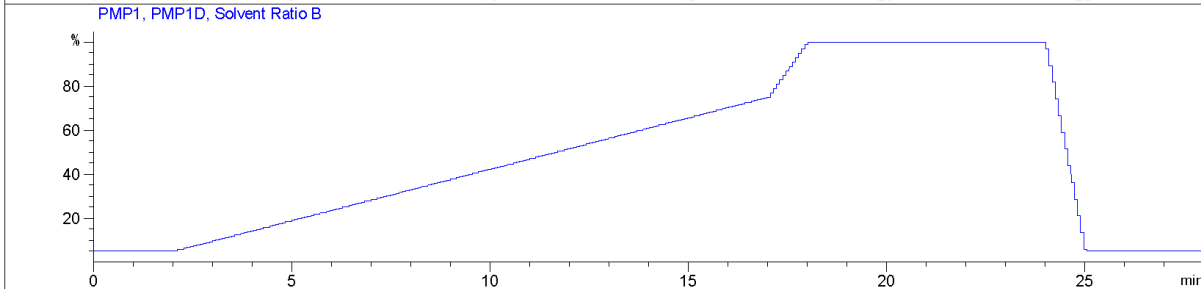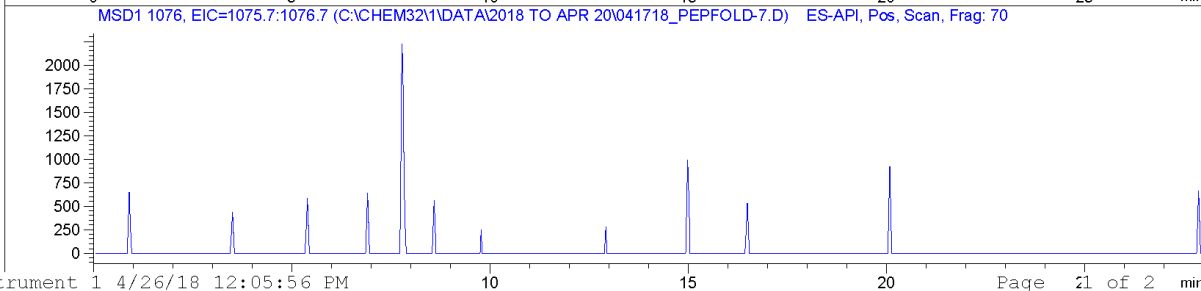

Data File C:\CHEM32\1\DATA\2018 TO APR 20\041718\_PEPFOLD-7.D  
Sample Name: 041718\_pepfold-7

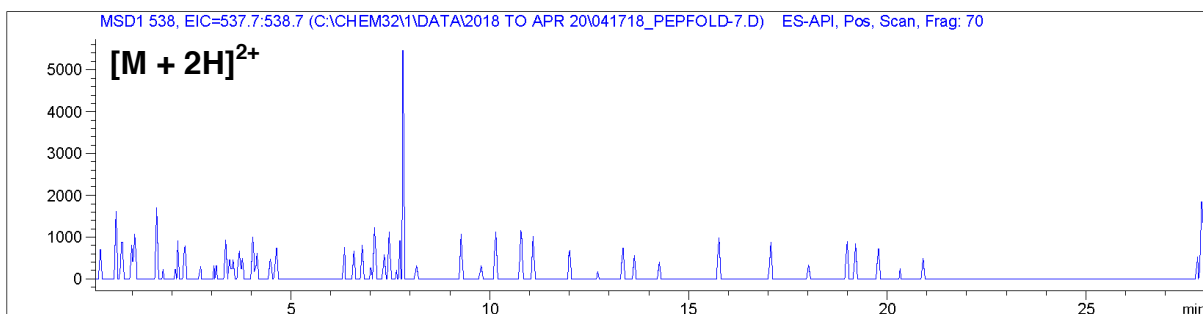

=====  
Area Percent Report  
=====

Sorted By : Signal  
Multiplier: : 1.0000  
Dilution: : 1.0000  
Do not use Multiplier & Dilution Factor with ISTDs

Signal 1: DAD1 B, Sig=210,4 Ref=off

| Peak # | RetTime [min] | Type | Width [min] | Area [mAU*s] | Height [mAU] | Area %  |
|--------|---------------|------|-------------|--------------|--------------|---------|
| 1      | 7.565         | MM   | 0.0488      | 6.21549      | 2.12108      | 4.0360  |
| 2      | 7.720         | FM   | 0.0823      | 140.03857    | 28.36635     | 90.9326 |
| 3      | 7.915         | MM   | 0.0409      | 7.74860      | 3.15911      | 5.0315  |

Totals : 154.00266 33.64654

Signal 2: MSD1 TIC, MS File

Signal 3: MSD1 1076, EIC=1075.7:1076.7

Signal 4: MSD1 538, EIC=537.7:538.7

=====  
\*\*\* End of Report \*\*\*

# PEP-FOLD-8, Ac-GGCPKPHPHGG-NH<sub>2</sub> (11)

Data File C:\CHEM32\1\DATA\2018 TO APR 20\041718\_PEPFOLD-8.D  
Sample Name: 041718\_pepfold-8

```
=====
Acq. Operator   : SGLK                      Seq. Line :    8
Acq. Instrument : Instrument 1              Location  : Vial 68
Injection Date  : 4/17/18 2:55:02 PM       Inj       :    1
                                                Inj Volume: 1.000 µl
Different Inj Volume from Sequence !      Actual Inj Volume : 2.000 µl
Acq. Method     : D:\CHEM32\1\METHODS\AP_C18_INSERT.M
Last changed    : 4/17/18 11:25:09 AM by SGLK
Analysis Method : Z:\DESKTOP\BERTOZZI LAB\LCMS INFO\LCMS METHODS TO 112917\SGLK_BERTOZZIBP_
                WITHINSERT.M
Last changed    : 4/26/18 11:40:30 AM
                (modified after loading)
Additional Info  : Peak(s) manually integrated
=====
```

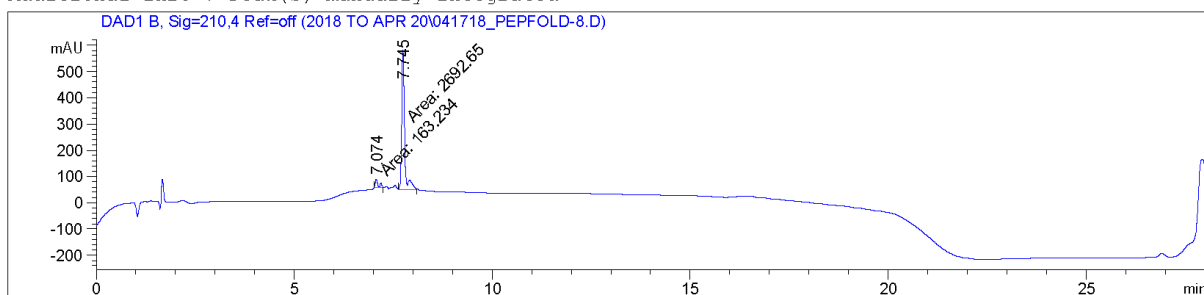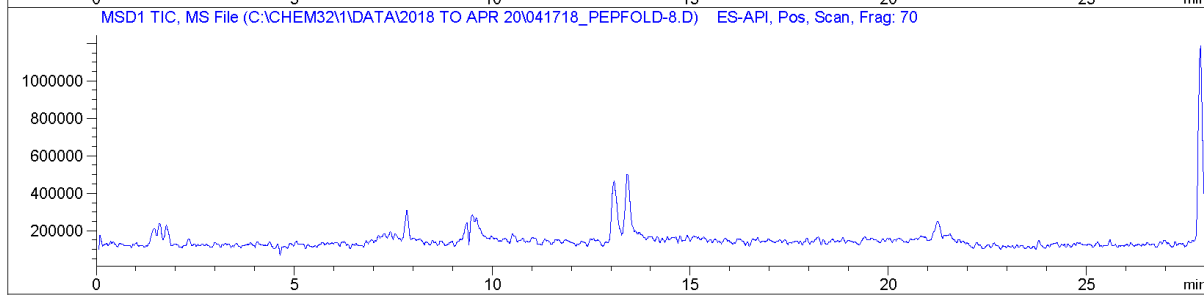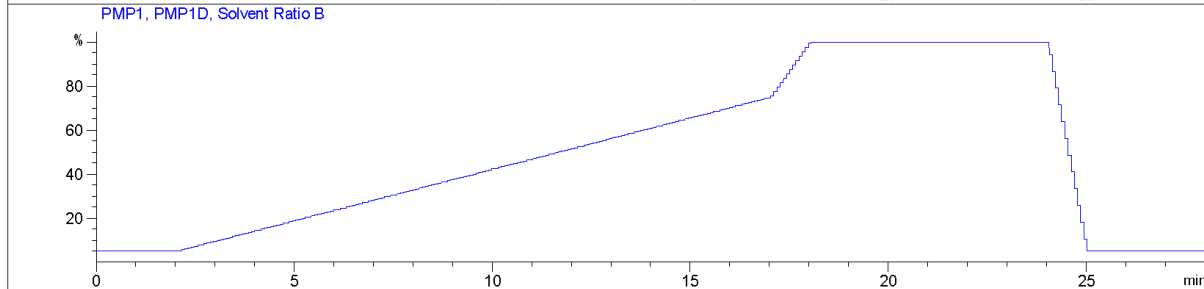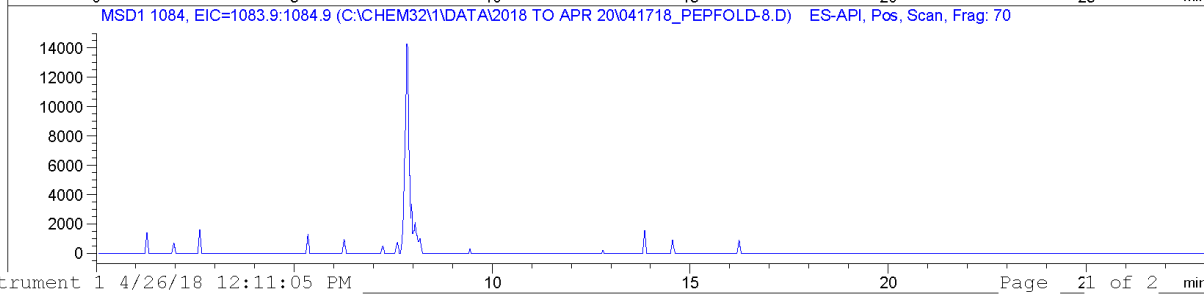

Data File C:\CHEM32\1\DATA\2018 TO APR 20\041718\_PEPFOLD-8.D  
Sample Name: 041718\_pepfold-8

=====  
Area Percent Report  
=====

Sorted By : Signal  
Multiplier: : 1.0000  
Dilution: : 1.0000  
Do not use Multiplier & Dilution Factor with ISTDs

Signal 1: DAD1 B, Sig=210,4 Ref=off

| Peak # | RetTime [min] | Type | Width [min] | Area [mAU*s] | Height [mAU] | Area %  |
|--------|---------------|------|-------------|--------------|--------------|---------|
| 1      | 7.074         | MM   | 0.0863      | 163.23375    | 31.52087     | 5.7157  |
| 2      | 7.745         | MM   | 0.0839      | 2692.64893   | 534.70697    | 94.2843 |

Totals : 2855.88268 566.22784

Signal 2: MSD1 TIC, MS File

Signal 3: MSD1 1084, EIC=1083.9:1084.9

=====  
\*\*\* End of Report \*\*\*



Data File C:\CHEM32\1\DATA\2018 TO APR 20\041718\_PEPFOLD-9.D  
Sample Name: 041718\_pepfold-9

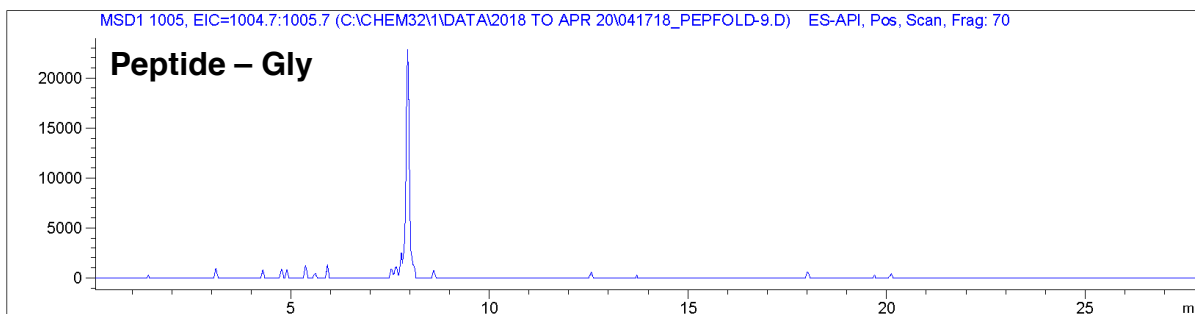

=====  
Area Percent Report  
=====

Sorted By : Signal  
Multiplier: : 1.0000  
Dilution: : 1.0000  
Do not use Multiplier & Dilution Factor with ISTDs

Signal 1: DAD1 B, Sig=210,4 Ref=off

| Peak # | RetTime [min] | Type | Width [min] | Area [mAU*s] | Height [mAU] | Area %  |
|--------|---------------|------|-------------|--------------|--------------|---------|
| 1      | 7.837         | MM   | 0.0960      | 5536.45996   | 960.84705    | 94.9663 |
| 2      | 7.991         | MM   | 0.0538      | 293.46121    | 90.87576     | 5.0337  |

Totals : 5829.92117 1051.72280

Signal 2: MSD1 TIC, MS File

Signal 3: MSD1 1062, EIC=1061.7:1062.7

Signal 4: MSD1 1005, EIC=1004.7:1005.7

=====  
\*\*\* End of Report \*\*\*

# PEP-FOLD-11, Ac-GGCPDPHPKGG-NH<sub>2</sub> (13)

Data File C:\CHEM32\1\DATA\2018 TO APR 20\041718\_PEPFOLD-11.D  
Sample Name: 041718\_pepfold-11

```
=====
Acq. Operator   : SGLK                      Seq. Line : 10
Acq. Instrument : Instrument 1              Location  : Vial 70
Injection Date  : 4/17/18 3:53:42 PM      Inj       : 1
                                                Inj Volume: 1.000 µl
Different Inj Volume from Sequence !      Actual Inj Volume : 2.000 µl
Acq. Method     : D:\CHEM32\1\METHODS\AP_C18_INSERT.M
Last changed    : 4/17/18 11:25:09 AM by SGLK
Analysis Method : Z:\DESKTOP\BERTOZZI LAB\LCMS INFO\LCMS METHODS TO 112917\SGLK_BERTOZZIBP_
                WITHINSERT.M
Last changed    : 4/26/18 12:19:51 PM
                (modified after loading)
Additional Info : Peak(s) manually integrated
=====
```

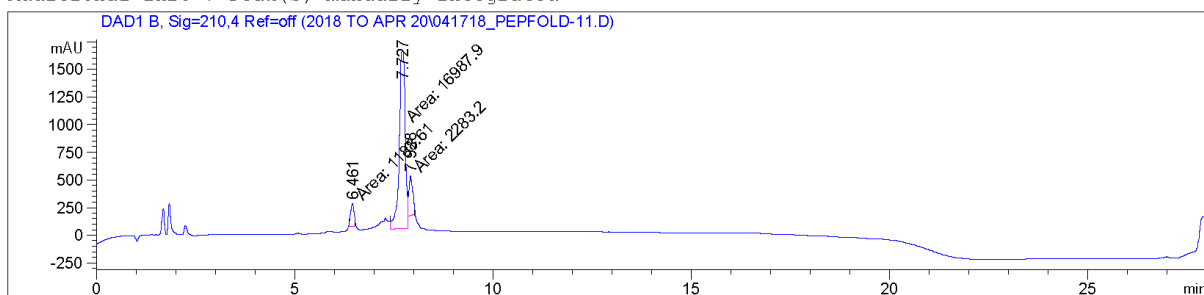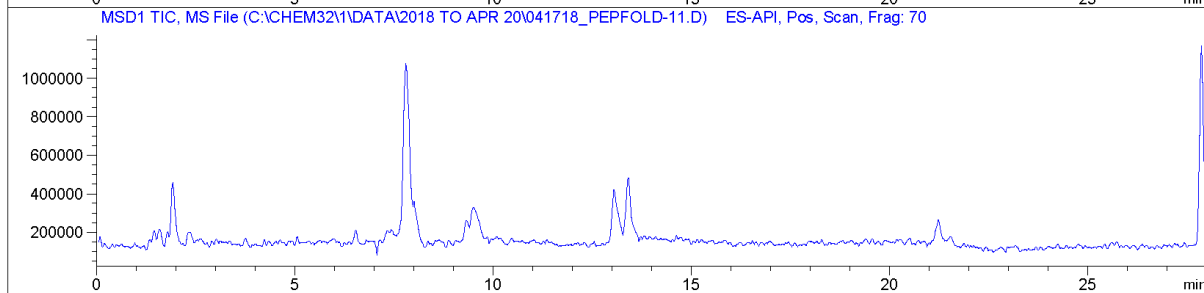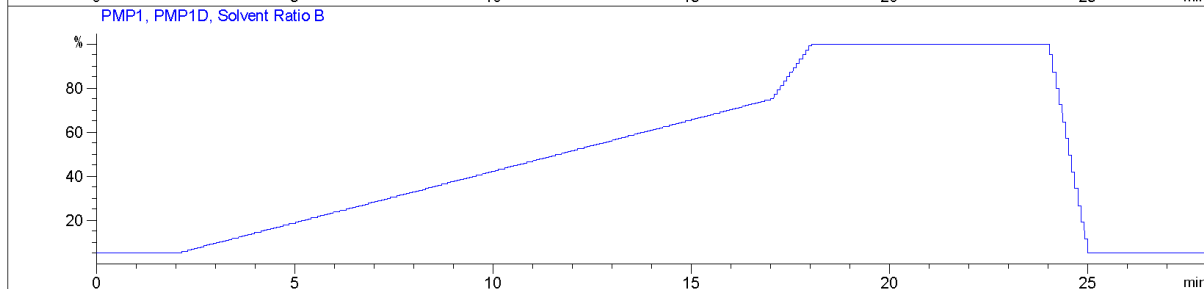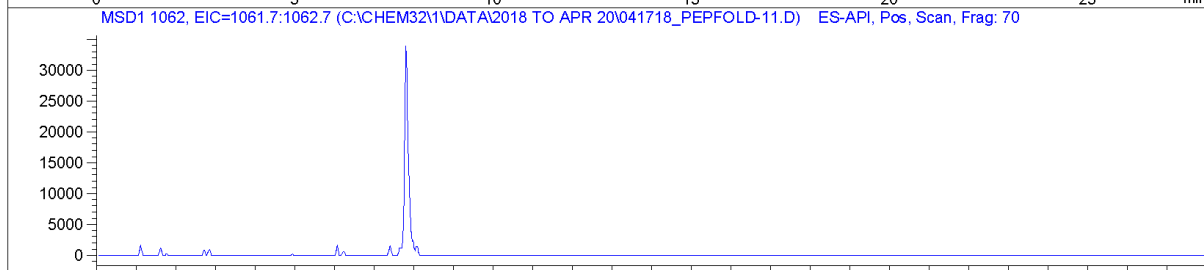

Instrument 1 4/26/18 12:21:49 PM Page 21 of 2 min



Data File C:\CHEM32\1\DATA\2018 TO APR 20\041718\_PEPFOLD-11.D  
Sample Name: 041718\_pepfold-11

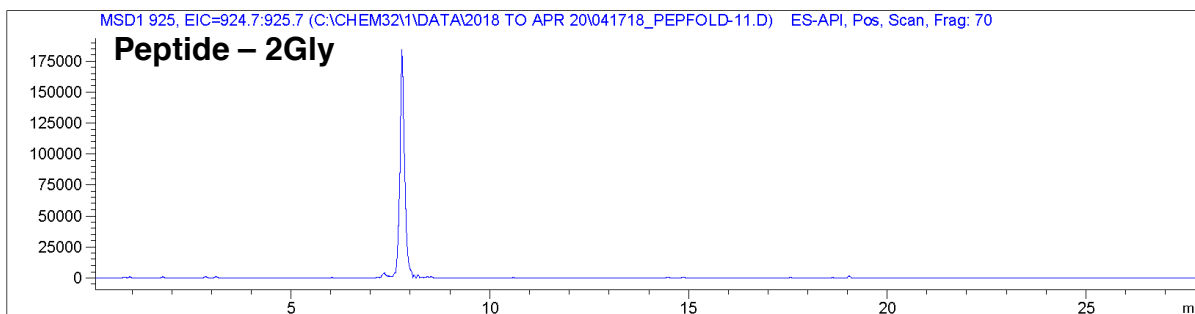

=====  
Area Percent Report  
=====

Sorted By : Signal  
Multiplier: : 1.0000  
Dilution: : 1.0000  
Do not use Multiplier & Dilution Factor with ISTDs

Signal 1: DAD1 B, Sig=210,4 Ref=off

| Peak # | RetTime [min] | Type | Width [min] | Area [mAU*s] | Height [mAU] | Area %  |
|--------|---------------|------|-------------|--------------|--------------|---------|
| 1      | 6.461         | MM   | 0.0969      | 1188.60876   | 204.49396    | 5.8095  |
| 2      | 7.727         | MM   | 0.1756      | 1.69879e4    | 1612.37292   | 83.0310 |
| 3      | 7.928         | MM   | 0.1060      | 2283.19775   | 358.82666    | 11.1595 |

Totals : 2.04597e4 2175.69354

Signal 2: MSD1 TIC, MS File

Signal 3: MSD1 1062, EIC=1061.7:1062.7

Signal 4: MSD1 925, EIC=924.7:925.7

=====  
\*\*\* End of Report \*\*\*

# PEP-FOLD-12, Ac-GGKPCPHPDGG-NH<sub>2</sub> (14)

Data File C:\CHEM32\1\DATA\2018 TO APR 20\041718\_PEPFOLD-12.D  
Sample Name: 041718\_pepfold-12

```
=====
Acq. Operator   : SGLK                               Seq. Line : 11
Acq. Instrument : Instrument 1                       Location  : Vial 71
Injection Date  : 4/17/18 4:23:01 PM                Inj       : 1
                                                    Inj Volume: 1.000 µl
Different Inj Volume from Sequence !   Actual Inj Volume : 2.000 µl
Acq. Method    : D:\CHEM32\1\METHODS\AP_C18_INSERT.M
Last changed   : 4/17/18 11:25:09 AM by SGLK
Analysis Method : Z:\DESKTOP\BERTOZZI LAB\LCMS INFO\LCMS METHODS TO 112917\SGLK_BERTOZZIBP_
                WITHINSERT.M
Last changed   : 4/26/18 12:19:51 PM
                (modified after loading)
Additional Info : Peak(s) manually integrated
=====
```

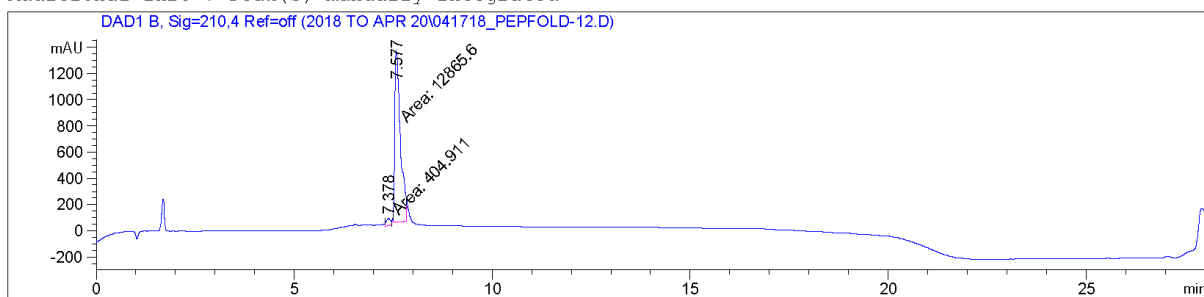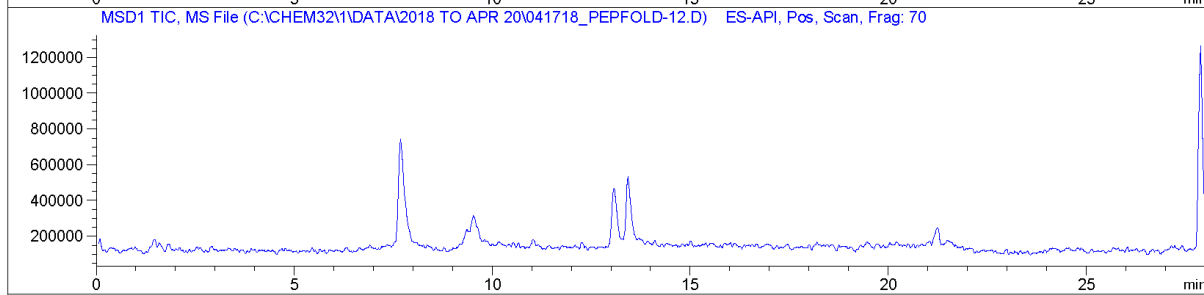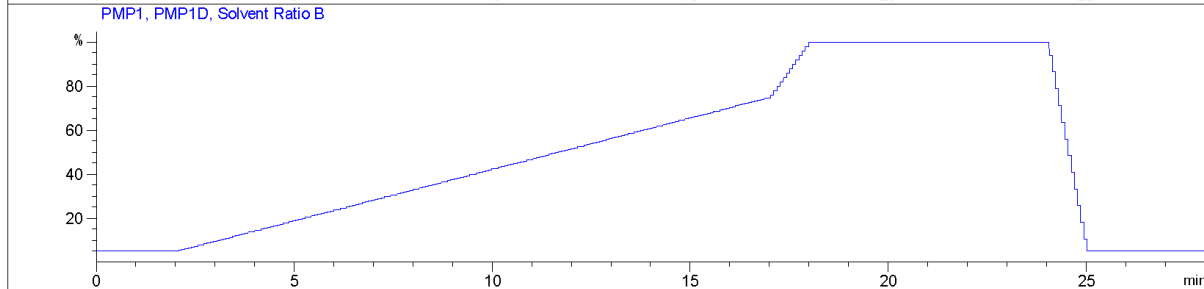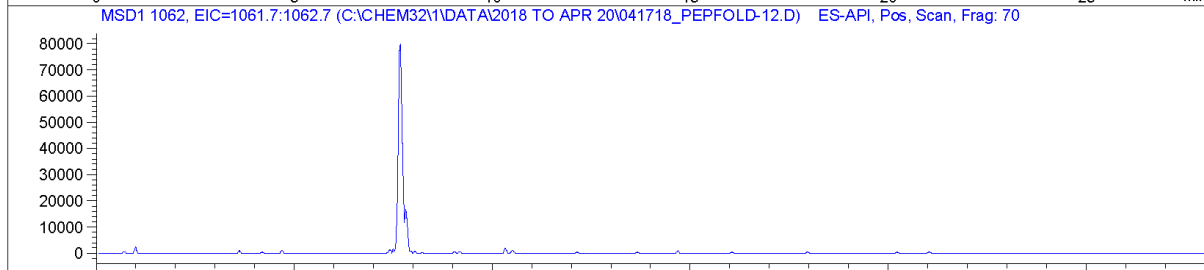

Data File C:\CHEM32\1\DATA\2018 TO APR 20\041718\_PEPFOLD-12.D  
Sample Name: 041718\_pepfold-12

=====  
Area Percent Report  
=====

Sorted By : Signal  
Multiplier: : 1.0000  
Dilution: : 1.0000  
Do not use Multiplier & Dilution Factor with ISTDs

Signal 1: DAD1 B, Sig=210,4 Ref=off

| Peak # | RetTime [min] | Type | Width [min] | Area [mAU*s] | Height [mAU] | Area %  |
|--------|---------------|------|-------------|--------------|--------------|---------|
| 1      | 7.378         | MF   | 0.1246      | 404.91074    | 54.17891     | 3.0512  |
| 2      | 7.577         | MM   | 0.1629      | 1.28656e4    | 1316.29163   | 96.9488 |

Totals : 1.32706e4 1370.47054

Signal 2: MSD1 TIC, MS File

Signal 3: MSD1 1062, EIC=1061.7:1062.7

=====  
\*\*\* End of Report \*\*\*



Data File C:\CHEM32\1\DATA\2018 TO APR 20\041718\_PEPFOLD-13.D  
Sample Name: 041718\_pepfold-13

=====  
Area Percent Report  
=====

Sorted By : Signal  
Multiplier: : 1.0000  
Dilution: : 1.0000  
Do not use Multiplier & Dilution Factor with ISTDs

Signal 1: DAD1 B, Sig=210,4 Ref=off

| Peak # | RetTime [min] | Type | Width [min] | Area [mAU*s] | Height [mAU] | Area %  |
|--------|---------------|------|-------------|--------------|--------------|---------|
| 1      | 9.429         | MM   | 0.0862      | 513.55121    | 99.34387     | 4.8848  |
| 2      | 9.634         | FM   | 0.1434      | 9999.78418   | 1161.94617   | 95.1152 |

Totals : 1.05133e4 1261.29004

Signal 2: MSD1 TIC, MS File

Signal 3: MSD1 1133, EIC=1132.7:1133.7

=====  
\*\*\* End of Report \*\*\*

# PEP-FOLD-14, Ac-GGWPHPGCPKGG-NH<sub>2</sub> (16)

Data File C:\CHEM32\1\DATA\2018 TO APR 20\041718\_PEPFOLD-14.D  
Sample Name: 041718\_pepfold-14

```
=====
Acq. Operator   : SGLK                      Seq. Line : 13
Acq. Instrument : Instrument 1                Location  : Vial 73
Injection Date  : 4/17/18 5:21:31 PM        Inj       : 1
                                                Inj Volume: 1.000 µl
Different Inj Volume from Sequence !      Actual Inj Volume : 2.000 µl
Acq. Method     : D:\CHEM32\1\METHODS\AP_C18_INSERT.M
Last changed    : 4/17/18 11:25:09 AM by SGLK
Analysis Method : Z:\DESKTOP\BERTOZZI LAB\LCMS INFO\LCMS METHODS TO 112917\SGLK_BERTOZZIBP_
                WITHINSERT.M
Last changed    : 4/26/18 12:19:51 PM
                (modified after loading)
Additional Info : Peak(s) manually integrated
=====
```

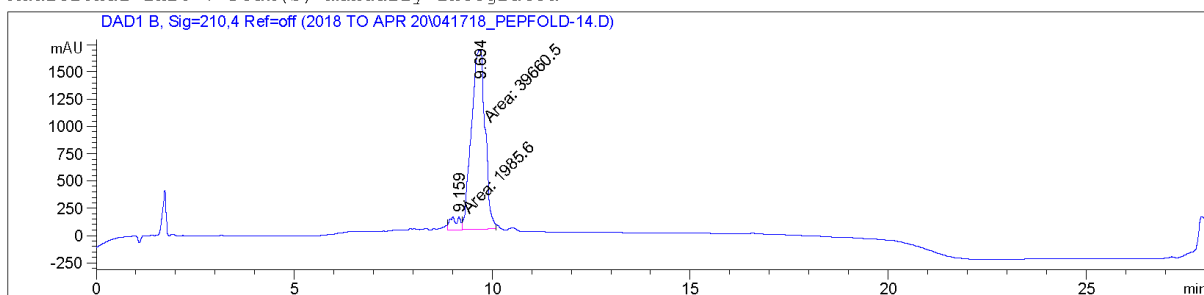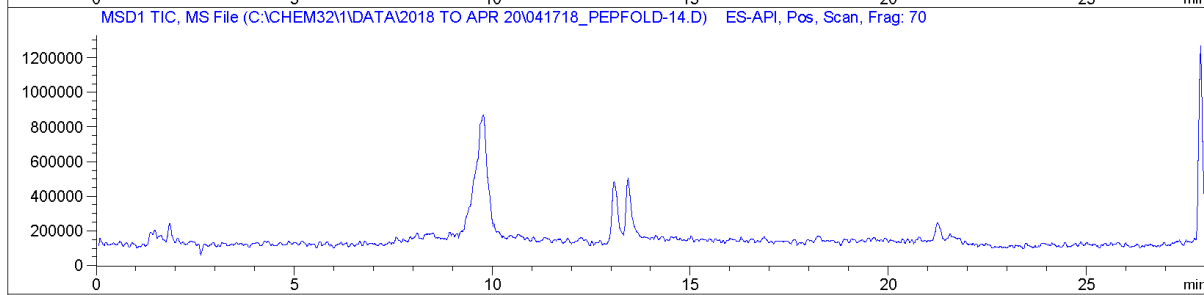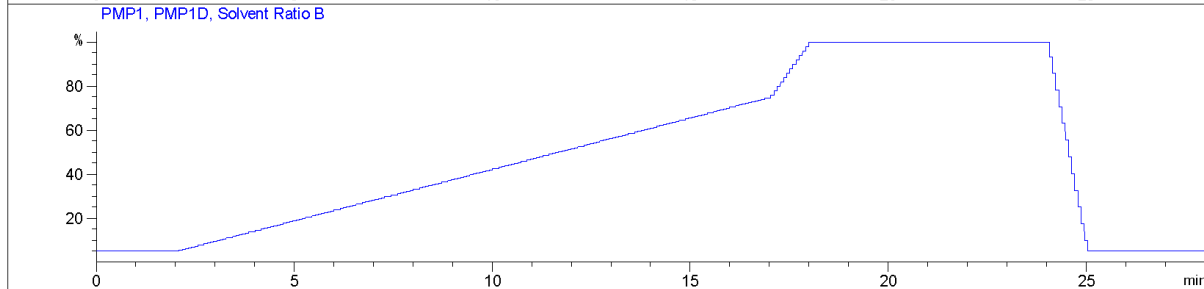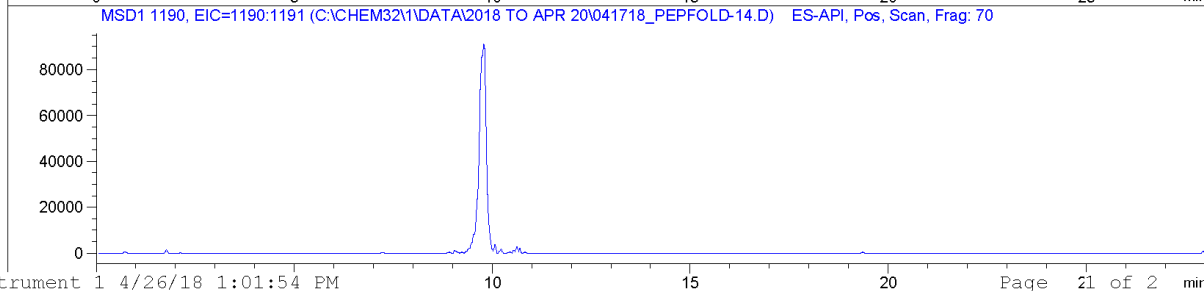

Data File C:\CHEM32\1\DATA\2018 TO APR 20\041718\_PEPFOLD-14.D  
Sample Name: 041718\_pepfold-14

=====  
Area Percent Report  
=====

Sorted By : Signal  
Multiplier: : 1.0000  
Dilution: : 1.0000  
Do not use Multiplier & Dilution Factor with ISTDs

Signal 1: DAD1 B, Sig=210,4 Ref=off

| Peak # | RetTime [min] | Type | Width [min] | Area [mAU*s] | Height [mAU] | Area %  |
|--------|---------------|------|-------------|--------------|--------------|---------|
| 1      | 9.159         | MF   | 0.2637      | 1985.60120   | 125.47730    | 4.7678  |
| 2      | 9.694         | FM   | 0.4020      | 3.96605e4    | 1644.22729   | 95.2322 |

Totals : 4.16461e4 1769.70460

Signal 2: MSD1 TIC, MS File

=====  
\*\*\* End of Report \*\*\*





Data File C:\CHEM32\1\DATA\2018 TO APR 20\041718\_PEPFOLD-15.D  
Sample Name: 041718\_pepfold-15

=====  
Area Percent Report  
=====

Sorted By : Signal  
Multiplier: : 1.0000  
Dilution: : 1.0000  
Do not use Multiplier & Dilution Factor with ISTDs

Signal 1: DAD1 B, Sig=210,4 Ref=off

| Peak # | RetTime [min] | Type | Width [min] | Area [mAU*s] | Height [mAU] | Area %  |
|--------|---------------|------|-------------|--------------|--------------|---------|
| 1      | 8.910         | MM   | 0.0731      | 96.39982     | 21.96997     | 0.7900  |
| 2      | 9.523         | MM   | 0.1717      | 1.16448e4    | 1130.44336   | 95.4322 |
| 3      | 9.708         | MM   | 0.0727      | 460.96796    | 105.69280    | 3.7777  |

Totals : 1.22022e4 1258.10614

Signal 2: MSD1 TIC, MS File

=====  
\*\*\* End of Report \*\*\*

# PEP-FOLD-16, Ac-GGHPHPKPCPEGG-NH<sub>2</sub> (18)

Data File C:\CHEM32\1\DATA\2018 TO APR 20\041718\_PEPFOLD-16.D  
Sample Name: 041718\_pepfold-16

```
=====
Acq. Operator   : SGLK                      Seq. Line : 15
Acq. Instrument : Instrument 1              Location  : Vial 75
Injection Date  : 4/17/18 6:20:08 PM      Inj       : 1
                                                Inj Volume: 1.000 µl
Different Inj Volume from Sequence !      Actual Inj Volume : 2.000 µl
Acq. Method    : D:\CHEM32\1\METHODS\AP_C18_INSERT.M
Last changed   : 4/17/18 11:25:09 AM by SGLK
Analysis Method : Z:\DESKTOP\BERTOZZI LAB\LCMS INFO\LCMS METHODS TO 112917\SGLK_BERTOZZIBP_
                WITHINSERT.M
Last changed   : 4/26/18 12:19:51 PM
                (modified after loading)
Additional Info : Peak(s) manually integrated
=====
```

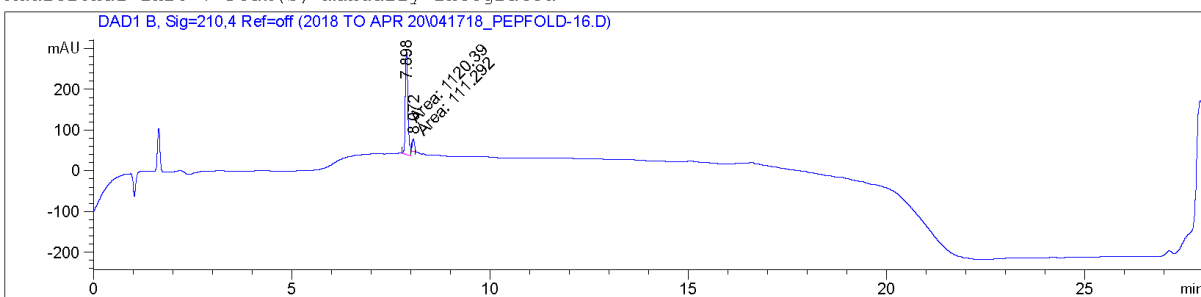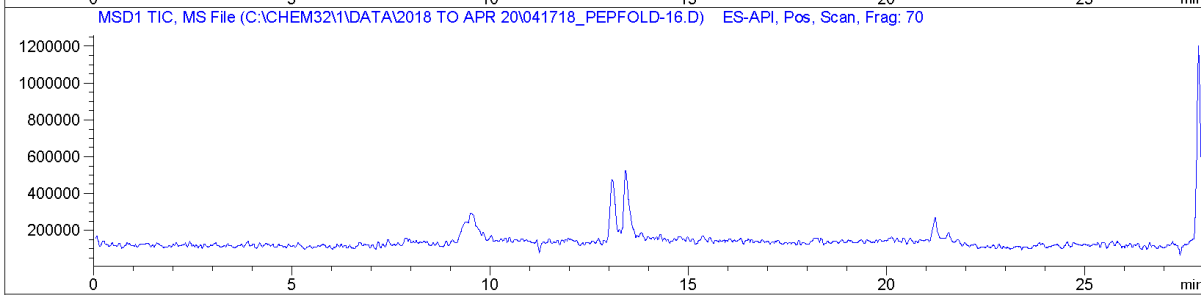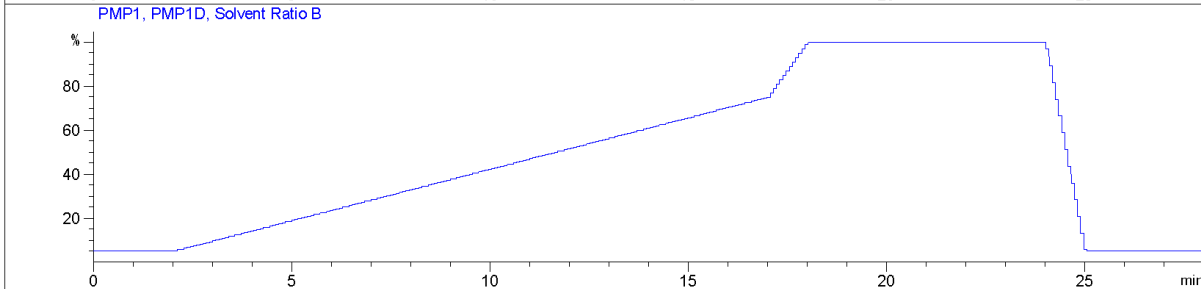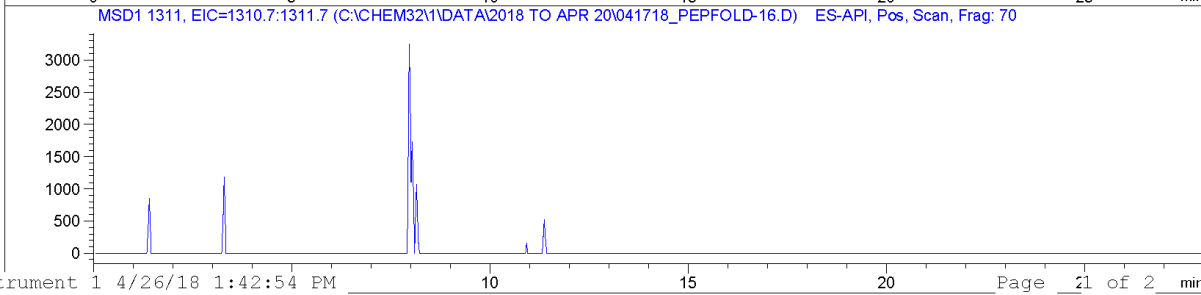

Instrument 1 4/26/18 1:42:54 PM Page 21 of 2 min

Data File C:\CHEM32\1\DATA\2018 TO APR 20\041718\_PEPFOLD-16.D  
Sample Name: 041718\_pepfold-16

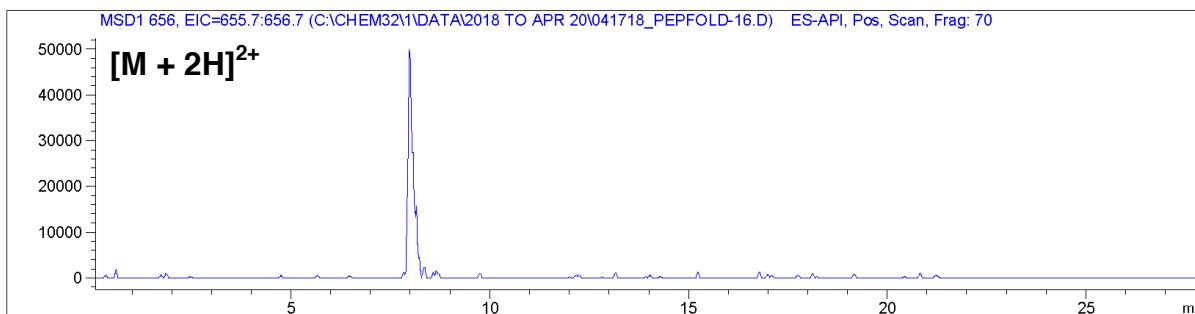

=====  
Area Percent Report  
=====

Sorted By : Signal  
Multiplier: : 1.0000  
Dilution: : 1.0000  
Do not use Multiplier & Dilution Factor with ISTDs

Signal 1: DAD1 B, Sig=210,4 Ref=off

| Peak # | RetTime [min] | Type | Width [min] | Area [mAU*s] | Height [mAU] | Area %  |
|--------|---------------|------|-------------|--------------|--------------|---------|
| 1      | 7.898         | MM   | 0.0726      | 1120.38989   | 257.31540    | 90.9642 |
| 2      | 8.072         | MM   | 0.0570      | 111.29197    | 32.53252     | 9.0358  |

Totals : 1231.68186 289.84792

Signal 2: MSD1 TIC, MS File

=====  
\*\*\* End of Report \*\*\*



Data File C:\CHEM32\1\DATA\2018 TO APR 20\041718\_PEPFOLD-17.D  
Sample Name: 041718\_pepfold-17

=====  
Area Percent Report  
=====

Sorted By : Signal  
Multiplier: : 1.0000  
Dilution: : 1.0000  
Do not use Multiplier & Dilution Factor with ISTDs

Signal 1: DAD1 B, Sig=210,4 Ref=off

| Peak # | RetTime [min] | Type | Width [min] | Area [mAU*s] | Height [mAU] | Area %  |
|--------|---------------|------|-------------|--------------|--------------|---------|
| 1      | 9.423         | MF   | 0.0528      | 685.16229    | 216.40576    | 4.3872  |
| 2      | 9.535         | FM   | 0.1557      | 1.49320e4    | 1598.33960   | 95.6128 |

Totals : 1.56172e4 1814.74536

Signal 2: MSD1 TIC, MS File

Signal 3: MSD1 1362, EIC=1361.1:1362.1

=====  
\*\*\* End of Report \*\*\*

# PEP-FOLD-18, Ac-GGHPKPGCGFGG-NH<sub>2</sub> (20)

Data File C:\CHEM32\1\DATA\2018 TO APR 20\041718\_PEPFOLD-18.D  
Sample Name: 041718\_pepfold-18

```
=====
Acq. Operator   : SGLK                      Seq. Line : 17
Acq. Instrument : Instrument 1              Location  : Vial 77
Injection Date  : 4/17/18 7:18:44 PM      Inj       : 1
                                                Inj Volume: 1.000 µl
Different Inj Volume from Sequence !      Actual Inj Volume : 2.000 µl
Acq. Method    : D:\CHEM32\1\METHODS\AP_C18_INSERT.M
Last changed   : 4/17/18 11:25:09 AM by SGLK
Analysis Method : Z:\DESKTOP\BERTOZZI LAB\LCMS INFO\LCMS METHODS TO 112917\SGLK_BERTOZZIBP_
                WITHINSERT.M
Last changed   : 4/26/18 12:19:51 PM
                (modified after loading)
Additional Info : Peak(s) manually integrated
=====
```

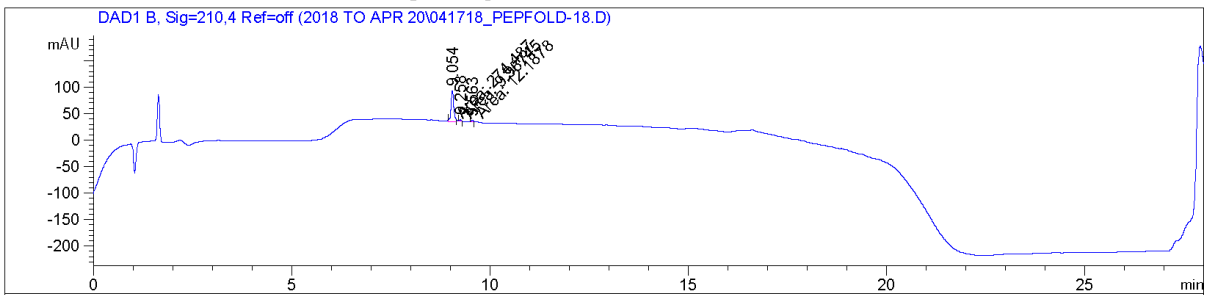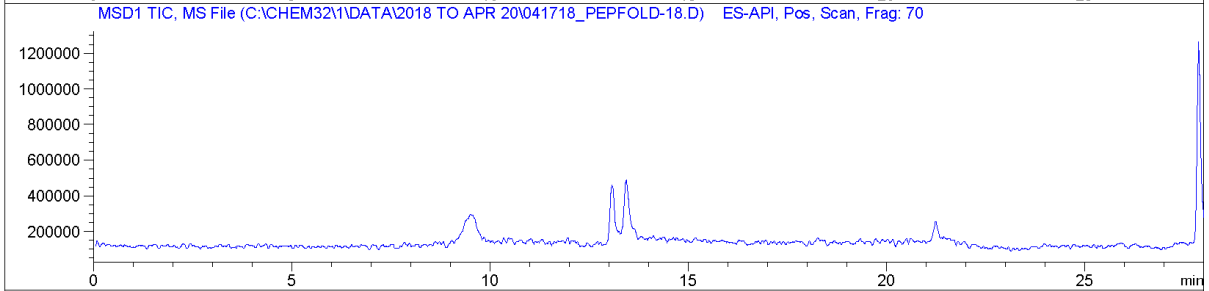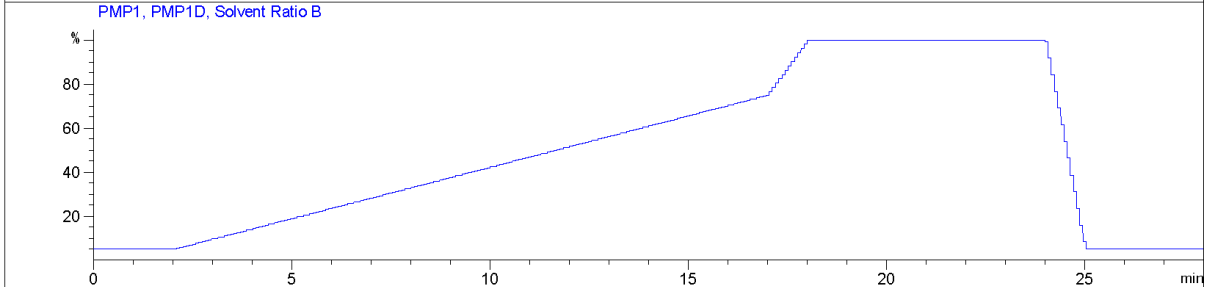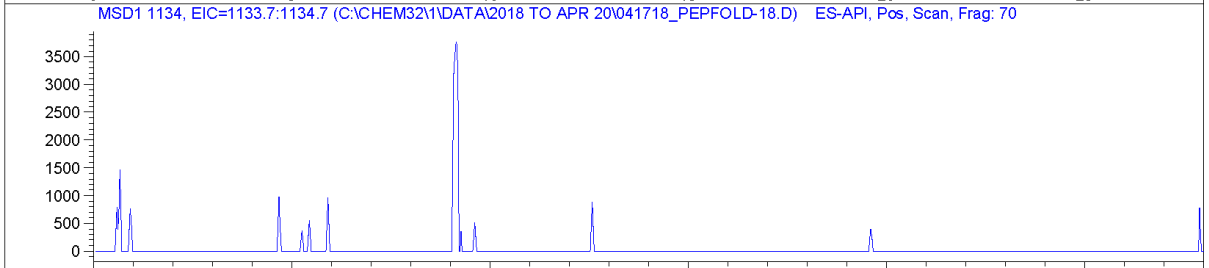

Instrument 1 4/26/18 1:51:04 PM Page 21 of 2 min

Data File C:\CHEM32\1\DATA\2018 TO APR 20\041718\_PEPFOLD-18.D  
Sample Name: 041718\_pepfold-18

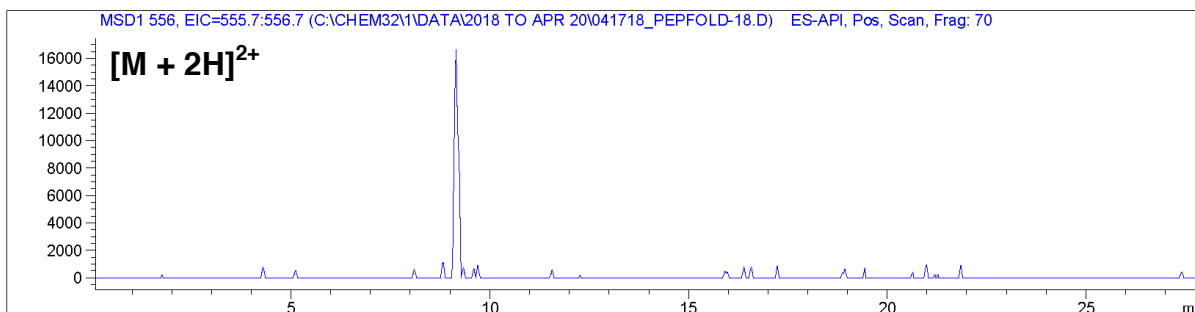

=====  
Area Percent Report  
=====

Sorted By : Signal  
Multiplier: : 1.0000  
Dilution: : 1.0000  
Do not use Multiplier & Dilution Factor with ISTDs

Signal 1: DAD1 B, Sig=210,4 Ref=off

| Peak # | RetTime [min] | Type | Width [min] | Area [mAU*s] | Height [mAU] | Area %  |
|--------|---------------|------|-------------|--------------|--------------|---------|
| 1      | 9.054         | MM   | 0.0770      | 274.48676    | 59.39601     | 92.5251 |
| 2      | 9.258         | MM   | 0.0569      | 9.98745      | 2.92673      | 3.3666  |
| 3      | 9.563         | MM   | 0.0678      | 12.18780     | 2.99629      | 4.1083  |

Totals : 296.66201 65.31904

Signal 2: MSD1 TIC, MS File

=====  
\*\*\* End of Report \*\*\*

# PEP-FOLD-19, Ac-GGHPKPCGFGG-NH<sub>2</sub> (21)

Data File C:\CHEM32\1\DATA\2018 TO APR 20\041718\_PEPFOLD-19.D  
Sample Name: 041718\_pepfold-19

=====

|                 |                      |            |            |
|-----------------|----------------------|------------|------------|
| Acq. Operator   | : SGLK               | Seq. Line  | : 18       |
| Acq. Instrument | : Instrument 1       | Location   | : Vial 78  |
| Injection Date  | : 4/17/18 7:48:01 PM | Inj        | : 1        |
|                 |                      | Inj Volume | : 1.000 µl |

Different Inj Volume from Sequence ! Actual Inj Volume : 2.000 µl

|                 |                                                                                         |
|-----------------|-----------------------------------------------------------------------------------------|
| Acq. Method     | : D:\CHEM32\1\METHODS\AP_C18_INSERT.M                                                   |
| Last changed    | : 4/17/18 11:25:09 AM by SGLK                                                           |
| Analysis Method | : Z:\DESKTOP\BERTOZZI LAB\LCMS INFO\LCMS METHODS TO 112917\SGLK_BERTOZZIBP_WITHINSERT.M |
| Last changed    | : 4/26/18 12:19:51 PM<br>(modified after loading)                                       |

Additional Info : Peak(s) manually integrated

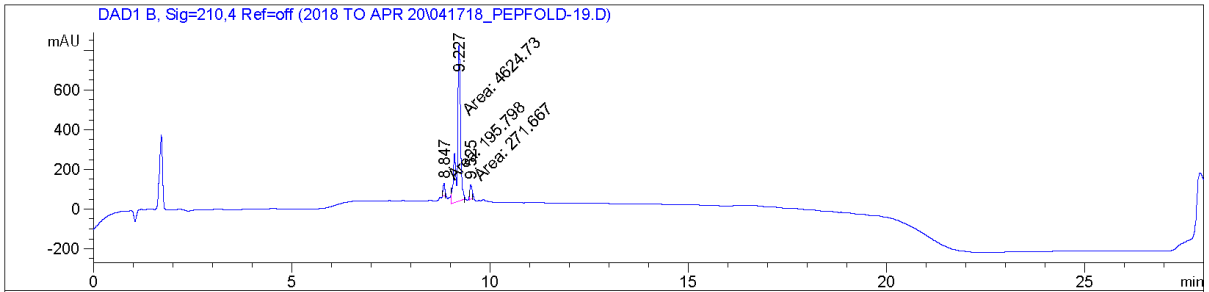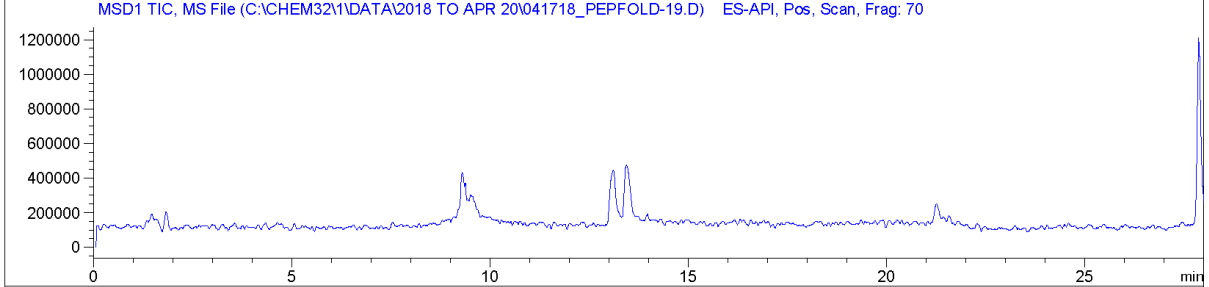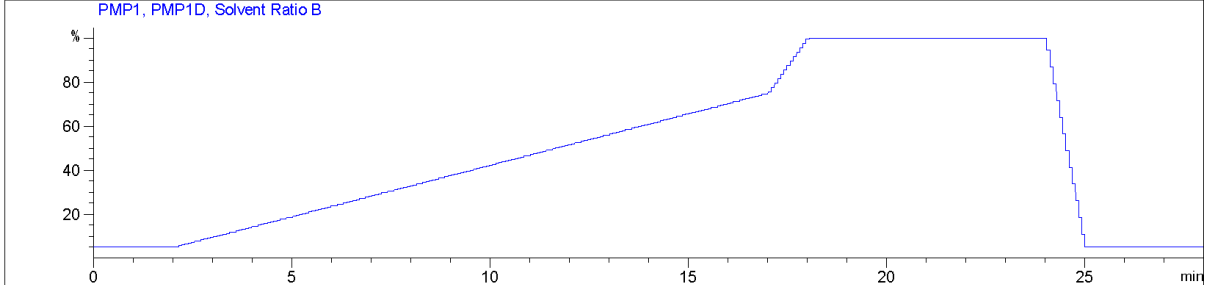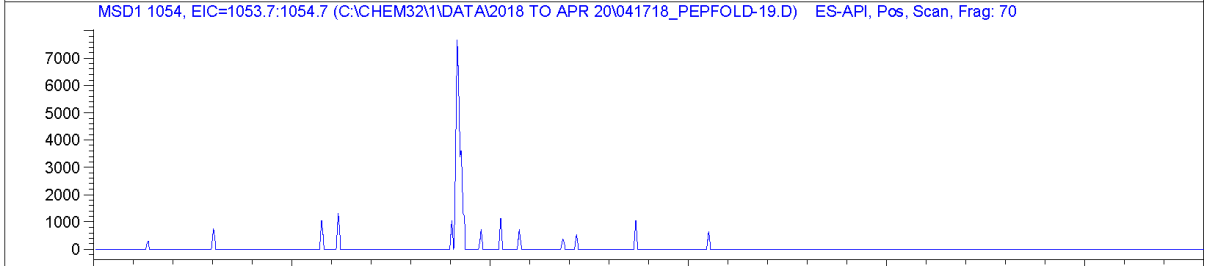



Data File C:\CHEM32\1\DATA\2018 TO APR 20\041718\_PEPFOLD-19.D  
Sample Name: 041718\_pepfold-19

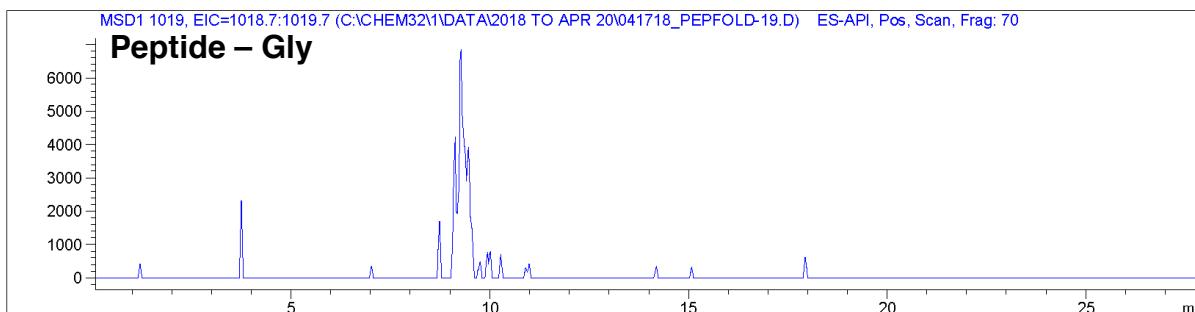

=====  
Area Percent Report  
=====

Sorted By : Signal  
Multiplier: : 1.0000  
Dilution: : 1.0000  
Do not use Multiplier & Dilution Factor with ISTDs

Signal 1: DAD1 B, Sig=210,4 Ref=off

| Peak # | RetTime [min] | Type | Width [min] | Area [mAU*s] | Height [mAU] | Area %  |
|--------|---------------|------|-------------|--------------|--------------|---------|
| 1      | 8.847         | MM   | 0.0498      | 195.79842    | 65.58862     | 3.8451  |
| 2      | 9.227         | MM   | 0.0964      | 4624.72705   | 799.44141    | 90.8199 |
| 3      | 9.525         | MM   | 0.0609      | 271.66748    | 74.33782     | 5.3350  |

Totals : 5092.19295 939.36784

Signal 2: MSD1 TIC, MS File

Signal 3: MSD1 1054, EIC=1053.7:1054.7

Signal 4: MSD1 1019, EIC=1018.7:1019.7

=====  
\*\*\* End of Report \*\*\*



Data File C:\CHEM32\1\DATA\2018 TO MAR 07\021518\_PEPFOLD3R\_REPUR3\_F26-LC-LONG.D  
Sample Name: 021518\_pepfold3r\_repur3\_f26-lc-long

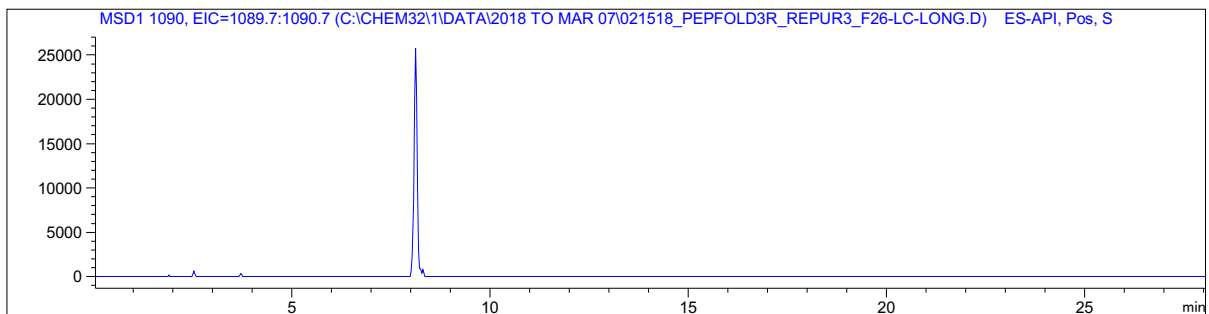

=====  
Area Percent Report  
=====

Sorted By : Signal  
Multiplier: : 1.0000  
Dilution: : 1.0000  
Do not use Multiplier & Dilution Factor with ISTDs

Signal 1: DAD1 B, Sig=210,4 Ref=off

| Peak # | RetTime [min] | Type | Width [min] | Area [mAU*s] | Height [mAU] | Area %  |
|--------|---------------|------|-------------|--------------|--------------|---------|
| 1      | 7.853         | MF   | 0.0853      | 58.17865     | 11.36420     | 0.7518  |
| 2      | 8.051         | FM   | 0.0776      | 7507.59863   | 1611.58948   | 97.0185 |
| 3      | 8.274         | FM   | 0.1097      | 138.12289    | 20.97552     | 1.7849  |
| 4      | 9.266         | MM   | 0.0639      | 34.41899     | 8.97556      | 0.4448  |

Totals : 7738.31917 1652.90476

Signal 2: MSD1 TIC, MS File

=====  
\*\*\* End of Report \*\*\*



Data File C:\CHEM32\1\DATA\2018 TO MAR 07\010518\010518\_1MMPEPFOLD-3S\_1.D  
Sample Name: 010518\_lmMpepfold-3S\_1

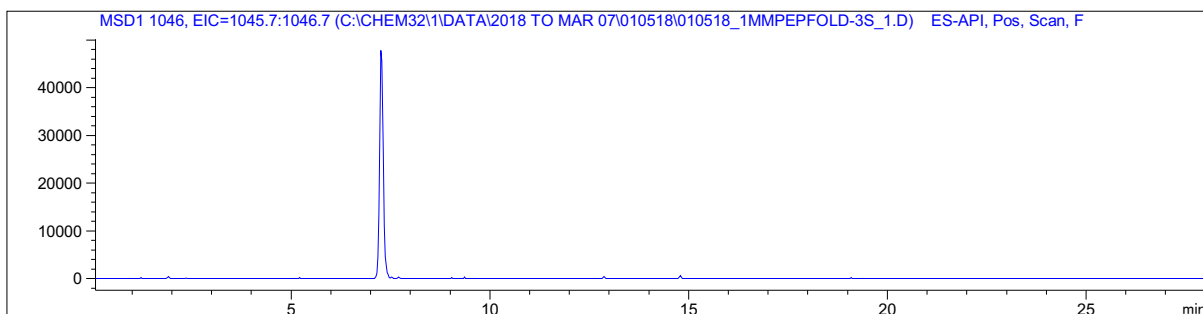

=====  
Area Percent Report  
=====

Sorted By : Signal  
Multiplier: : 1.0000  
Dilution: : 1.0000  
Do not use Multiplier & Dilution Factor with ISTDs

Signal 1: DAD1 B, Sig=210,4 Ref=360,100

| Peak # | RetTime [min] | Type | Width [min] | Area [mAU*s] | Height [mAU] | Area %  |
|--------|---------------|------|-------------|--------------|--------------|---------|
| 1      | 7.201         | MF   | 0.1101      | 1.22979e4    | 1862.15747   | 94.9863 |
| 2      | 7.419         | FM   | 0.1554      | 649.12140    | 69.64057     | 5.0137  |

Totals : 1.29470e4 1931.79804

Signal 2: MSD1 TIC, MS File

=====  
\*\*\* End of Report \*\*\*



Data File C:\CHEM32\1\DATA\2018 TO MAR 07\022318\_OLD-NMR-PF3-13CBTNAC-REPUR.D  
Sample Name: 022318\_old-nmr-pf3-13cbtnac-repur

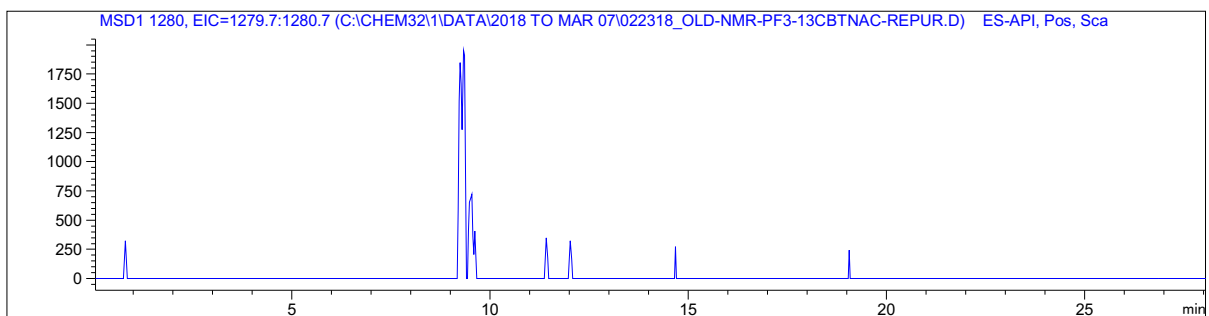

=====  
Area Percent Report  
=====

Sorted By : Signal  
Multiplier: : 1.0000  
Dilution: : 1.0000  
Do not use Multiplier & Dilution Factor with ISTDs

Signal 1: DAD1 F, Sig=200,4 Ref=off

| Peak # | RetTime [min] | Type | Width [min] | Area [mAU*s] | Height [mAU] | Area %  |
|--------|---------------|------|-------------|--------------|--------------|---------|
| 1      | 9.162         | MM   | 0.0911      | 4624.47559   | 846.48572    | 95.5475 |
| 2      | 17.466        | MM   | 0.0596      | 215.49754    | 60.21696     | 4.4525  |

Totals : 4839.97313 906.70268

Signal 2: MSD1 TIC, MS File

=====  
\*\*\* End of Report \*\*\*

## NMR Spectra



021218\_CBTNAC\_acetone\_proton  
STANDARD PROTON PARAMETERS

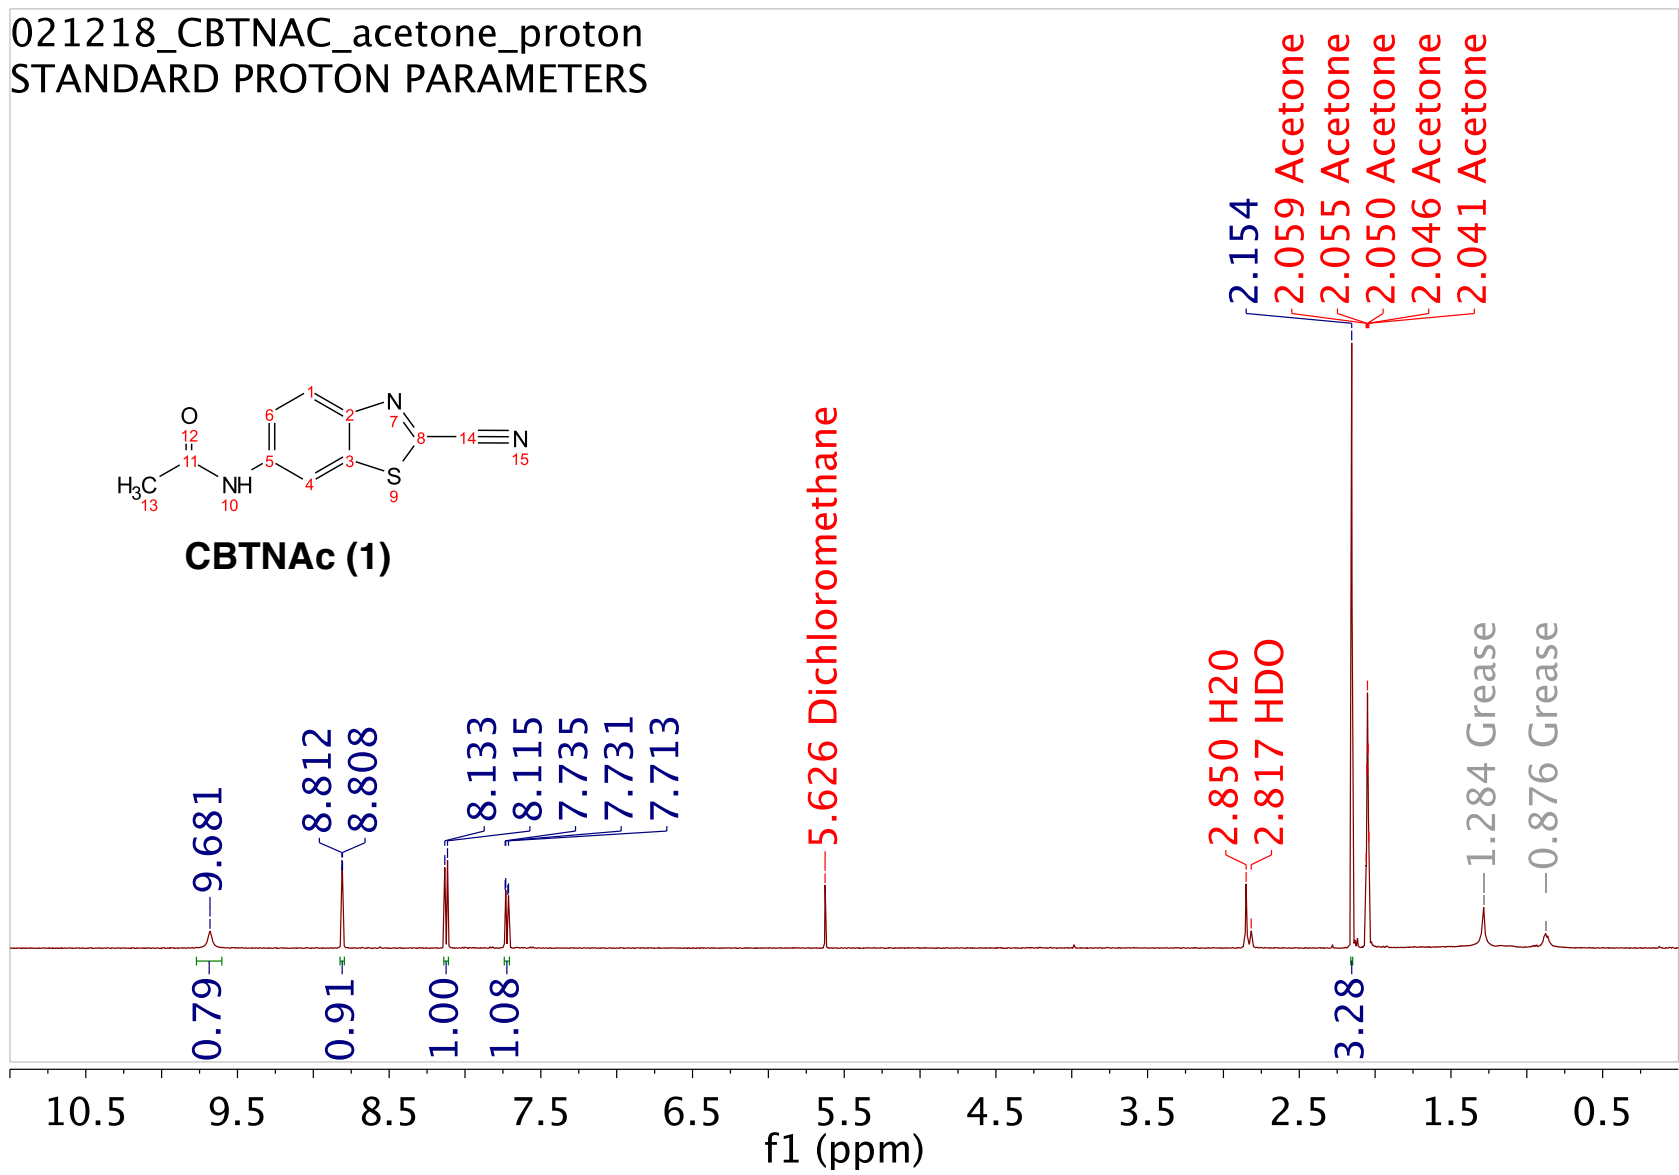

021218\_CBTNAC\_acetone\_proton  
STANDARD PROTON PARAMETERS

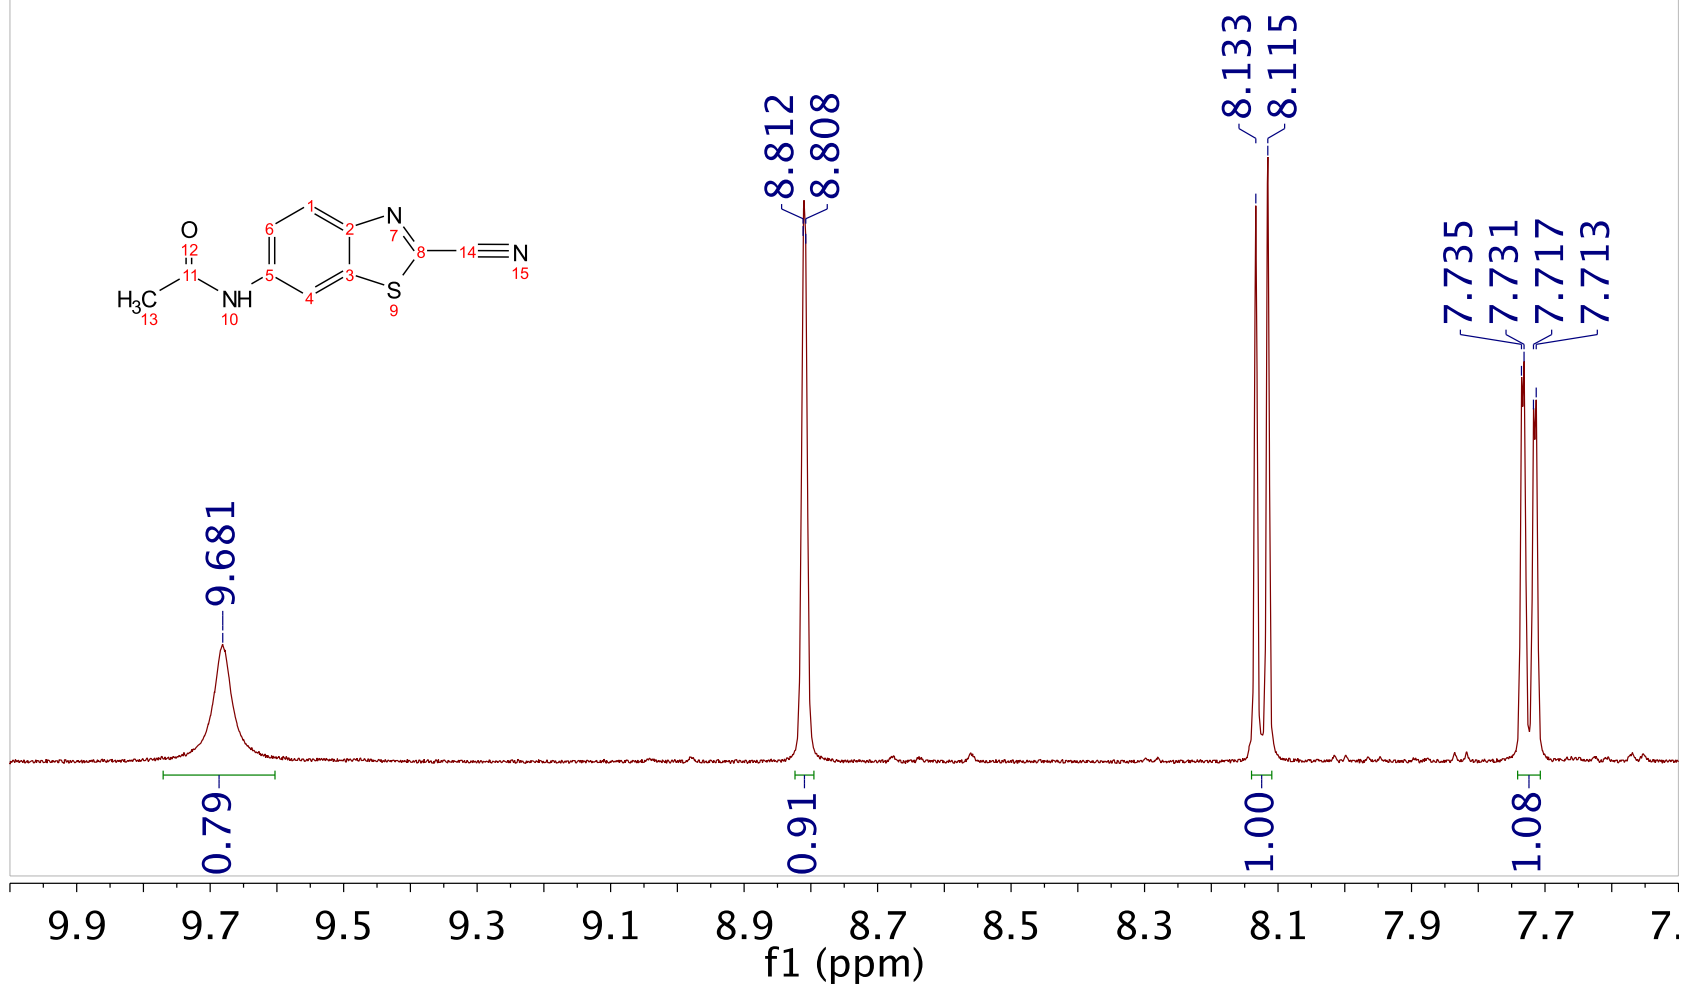

021218\_cbtnac\_acetone\_13c  
C13par

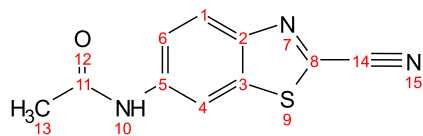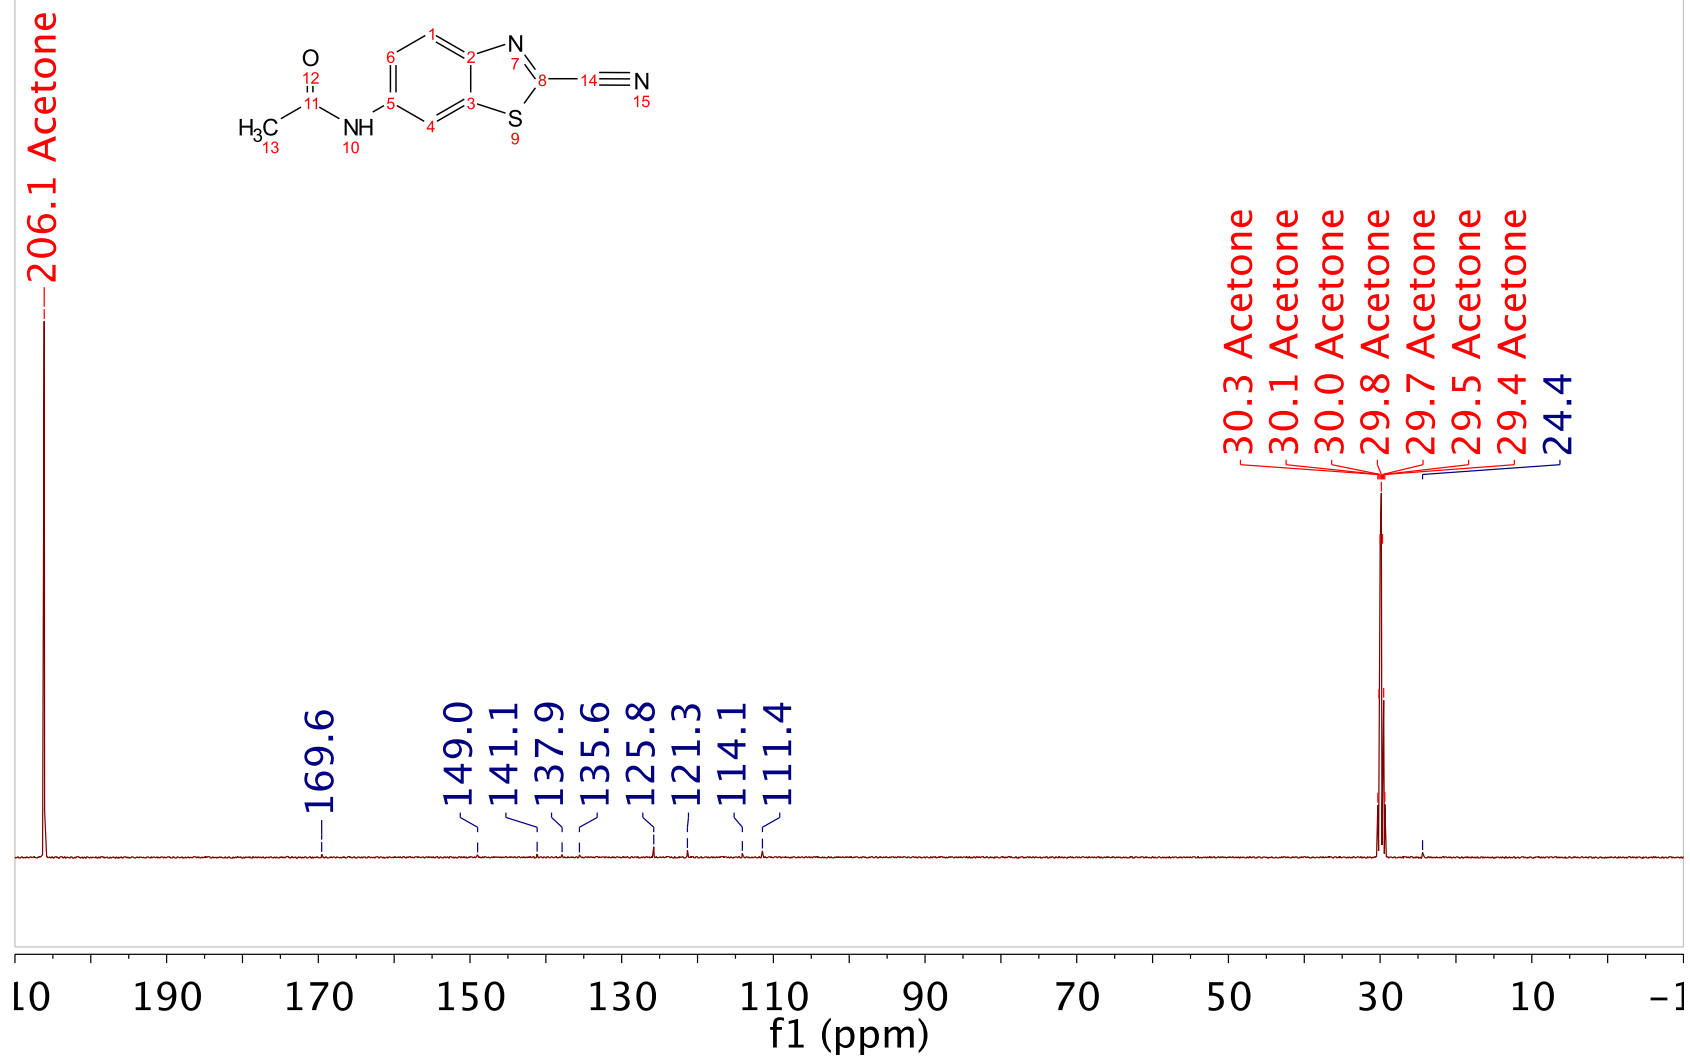

021218\_cbtnac\_acetone\_13c  
C13par

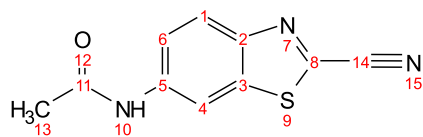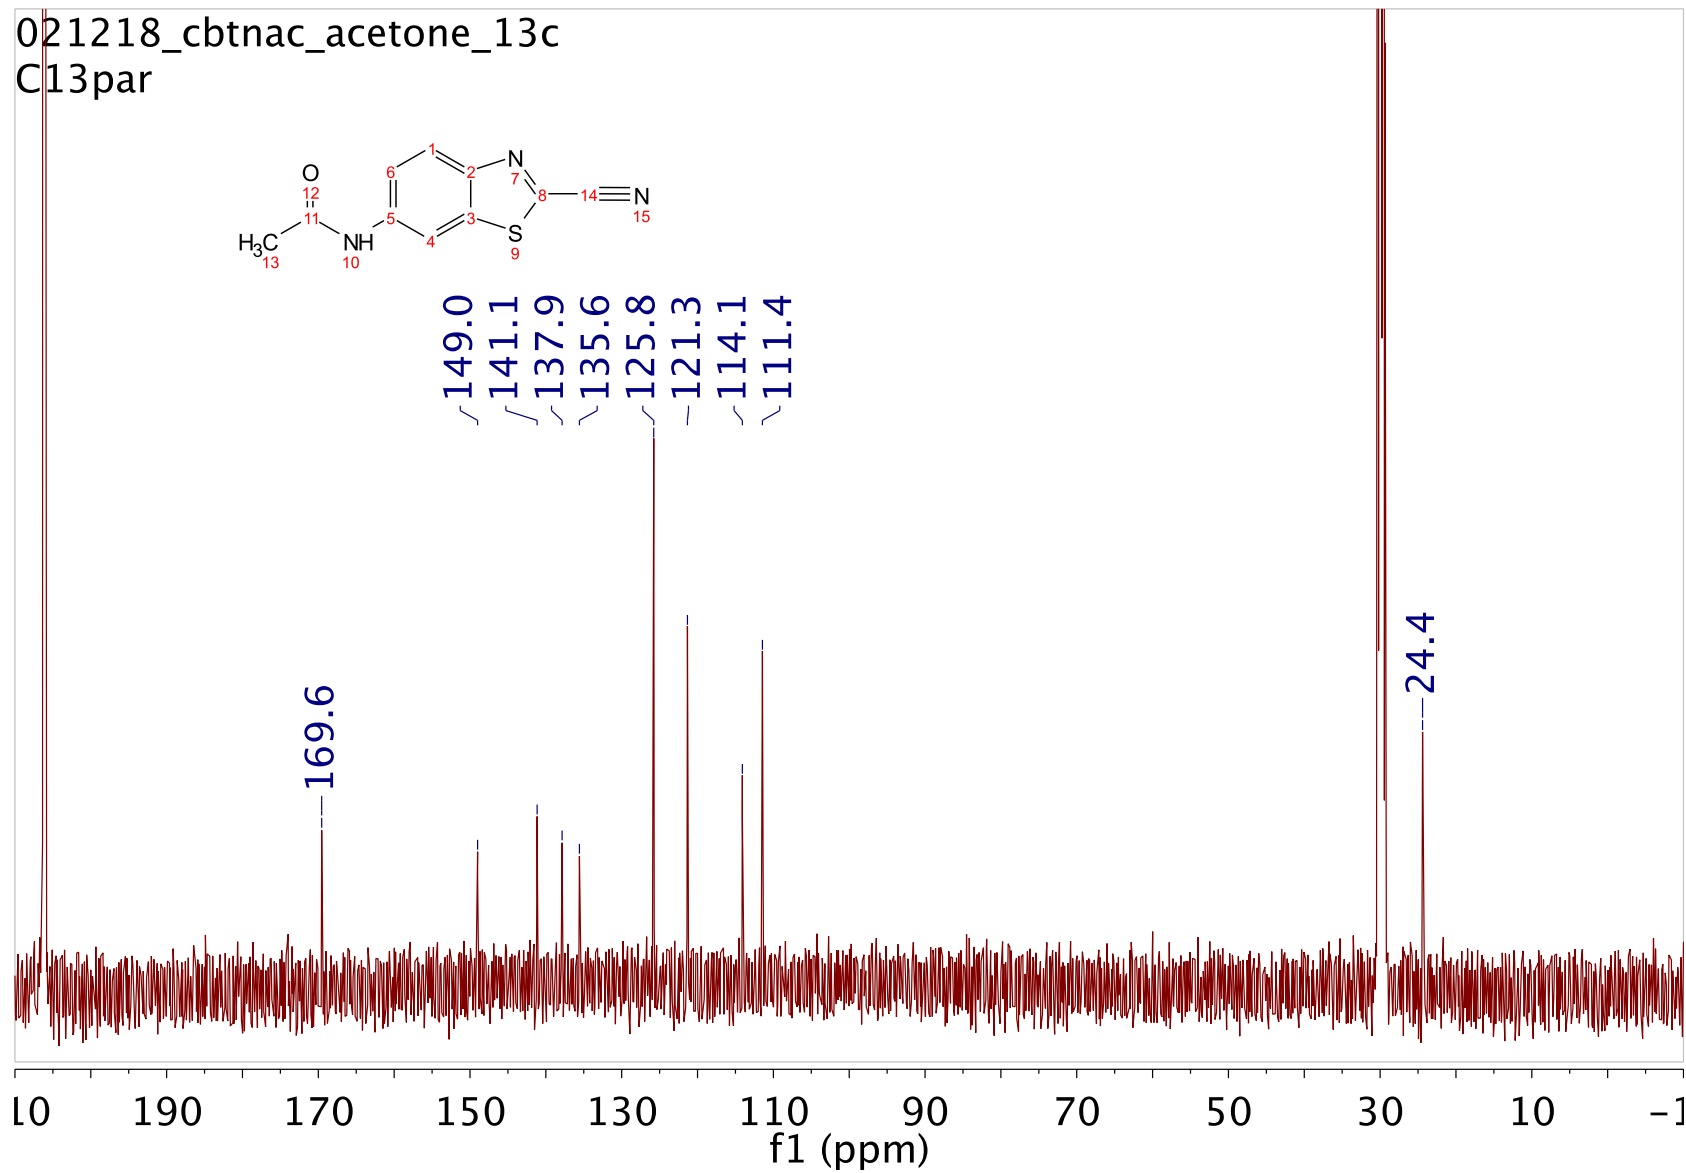

021218\_cbtnac\_acetone\_13c  
C13par

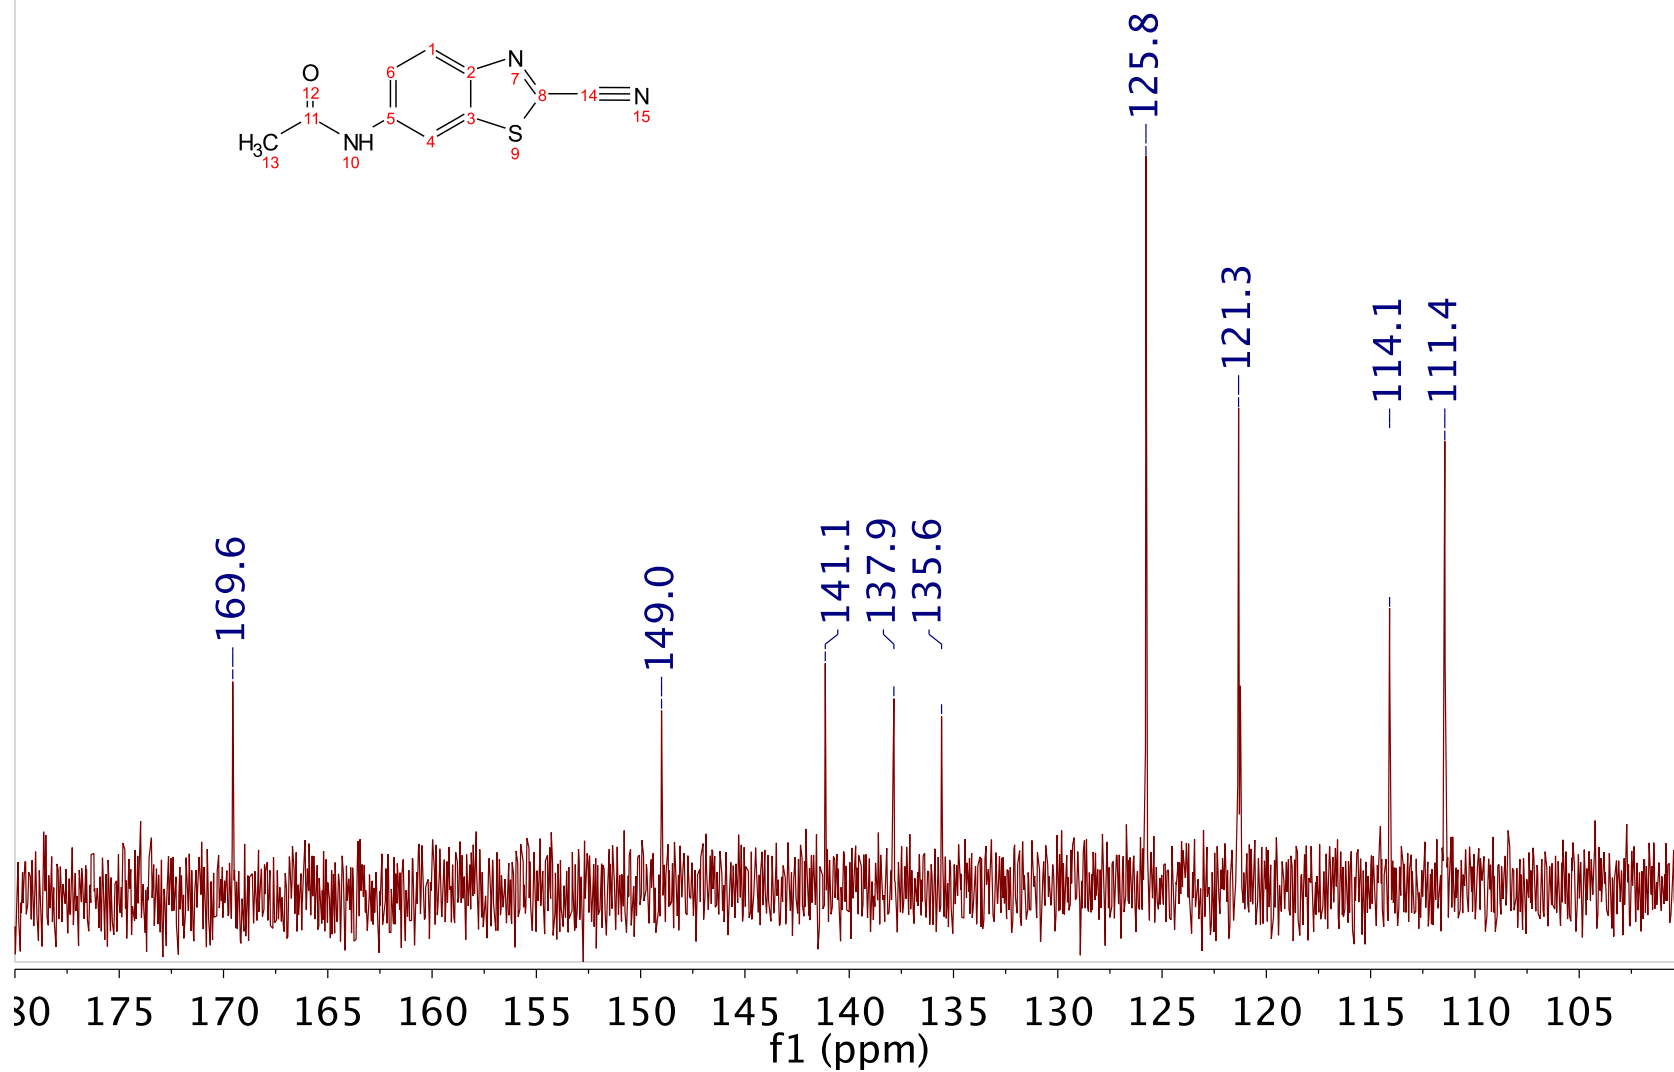

SGLK-i-CIBTNAc-TLCspot3polar.1.fid  
AVB-400 ZBO Proton starting parameters. 6/11/03 RN

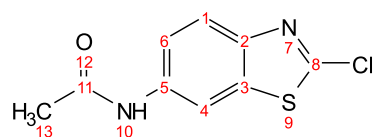

**CIBTNAc (2)**

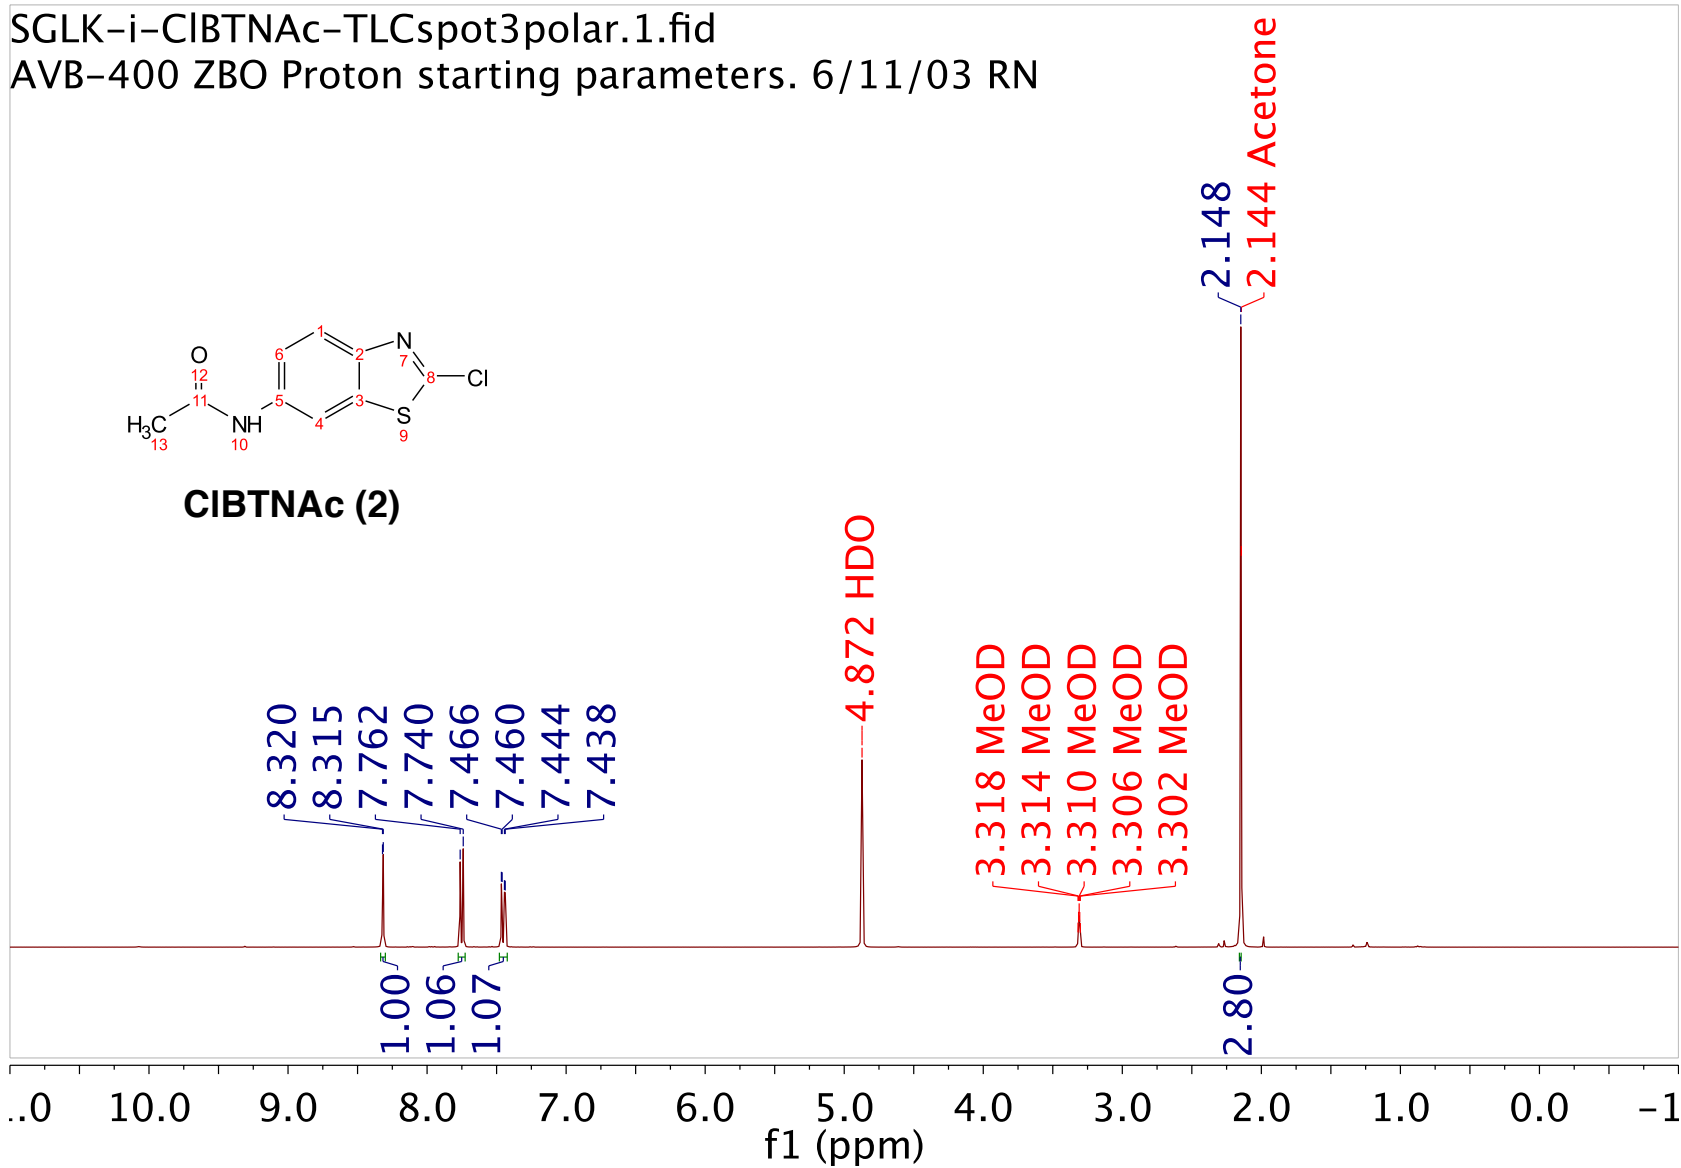

SGLK-i-CIBTNAc-TLCspot3polar.1.fid  
AVB-400 ZBO Proton starting parameters. 6/11/03 RN

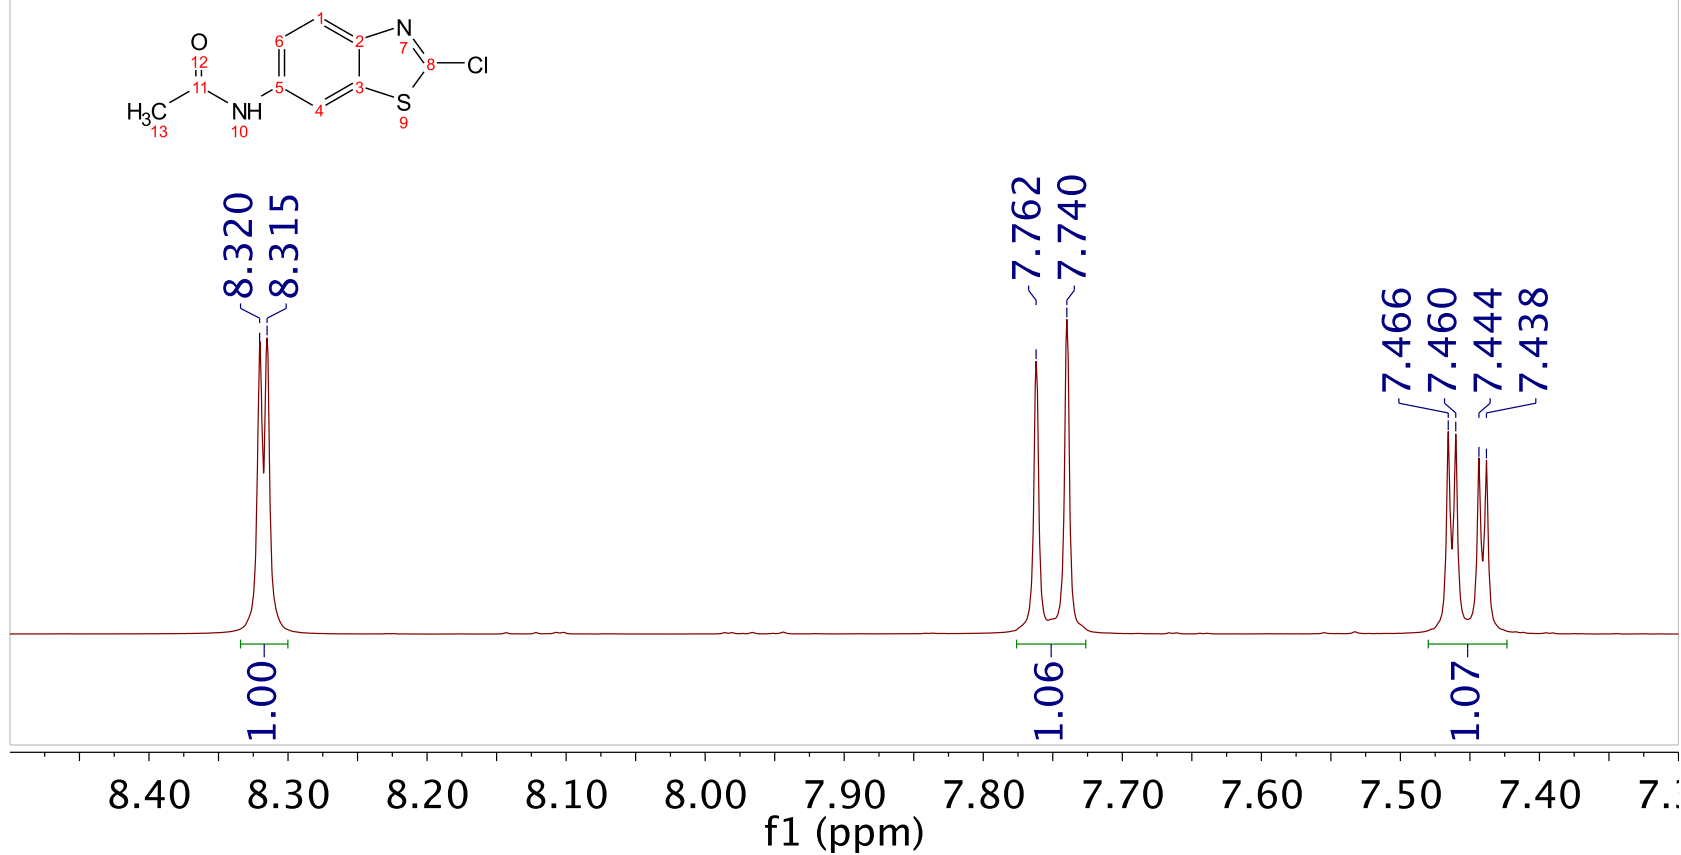

SGLK-i-CIBTNAc-TLCspot3polar-C13.1.fid  
AVB-400 ZBO Carbon Starting paramters 6/11/03 RN

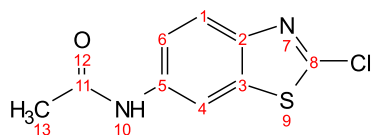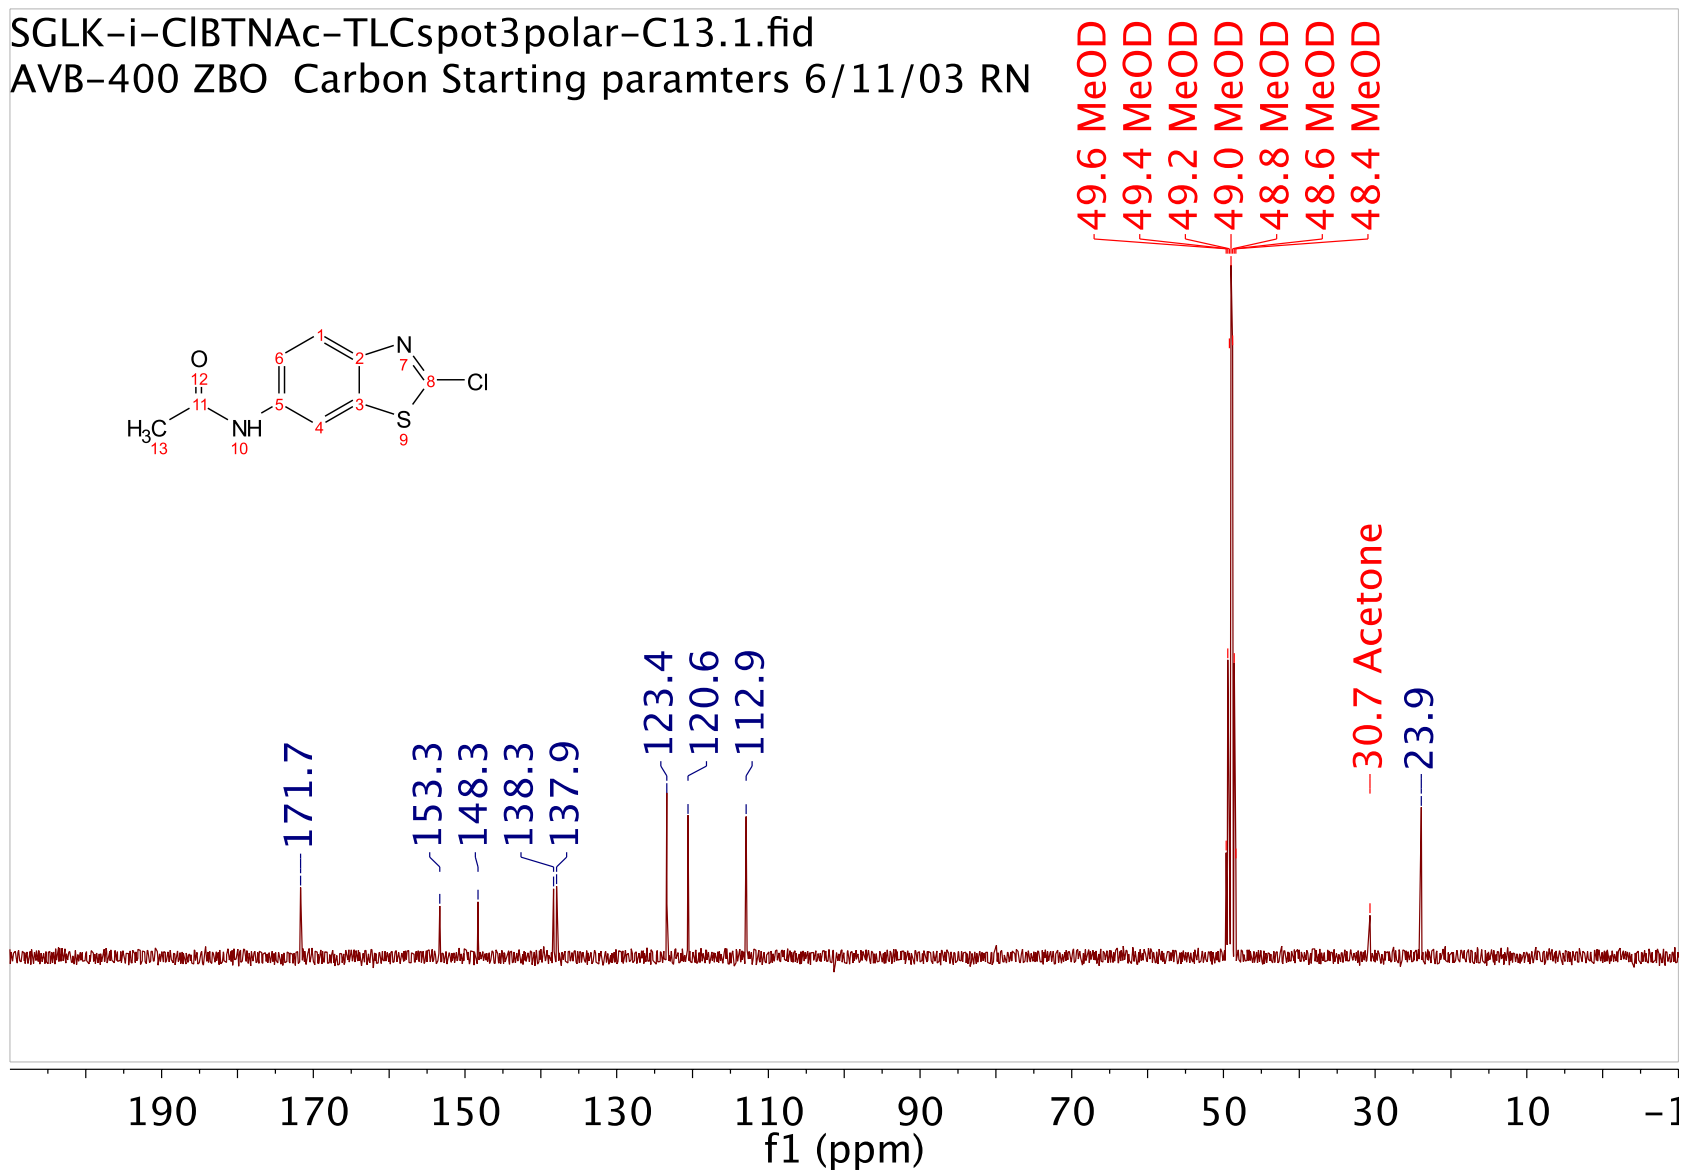



SGLK-i-CIBTNAc-TLCspot3polar-C13.1.fid  
AVB-400 ZBO Carbon Starting paramters 6/11/03 RN

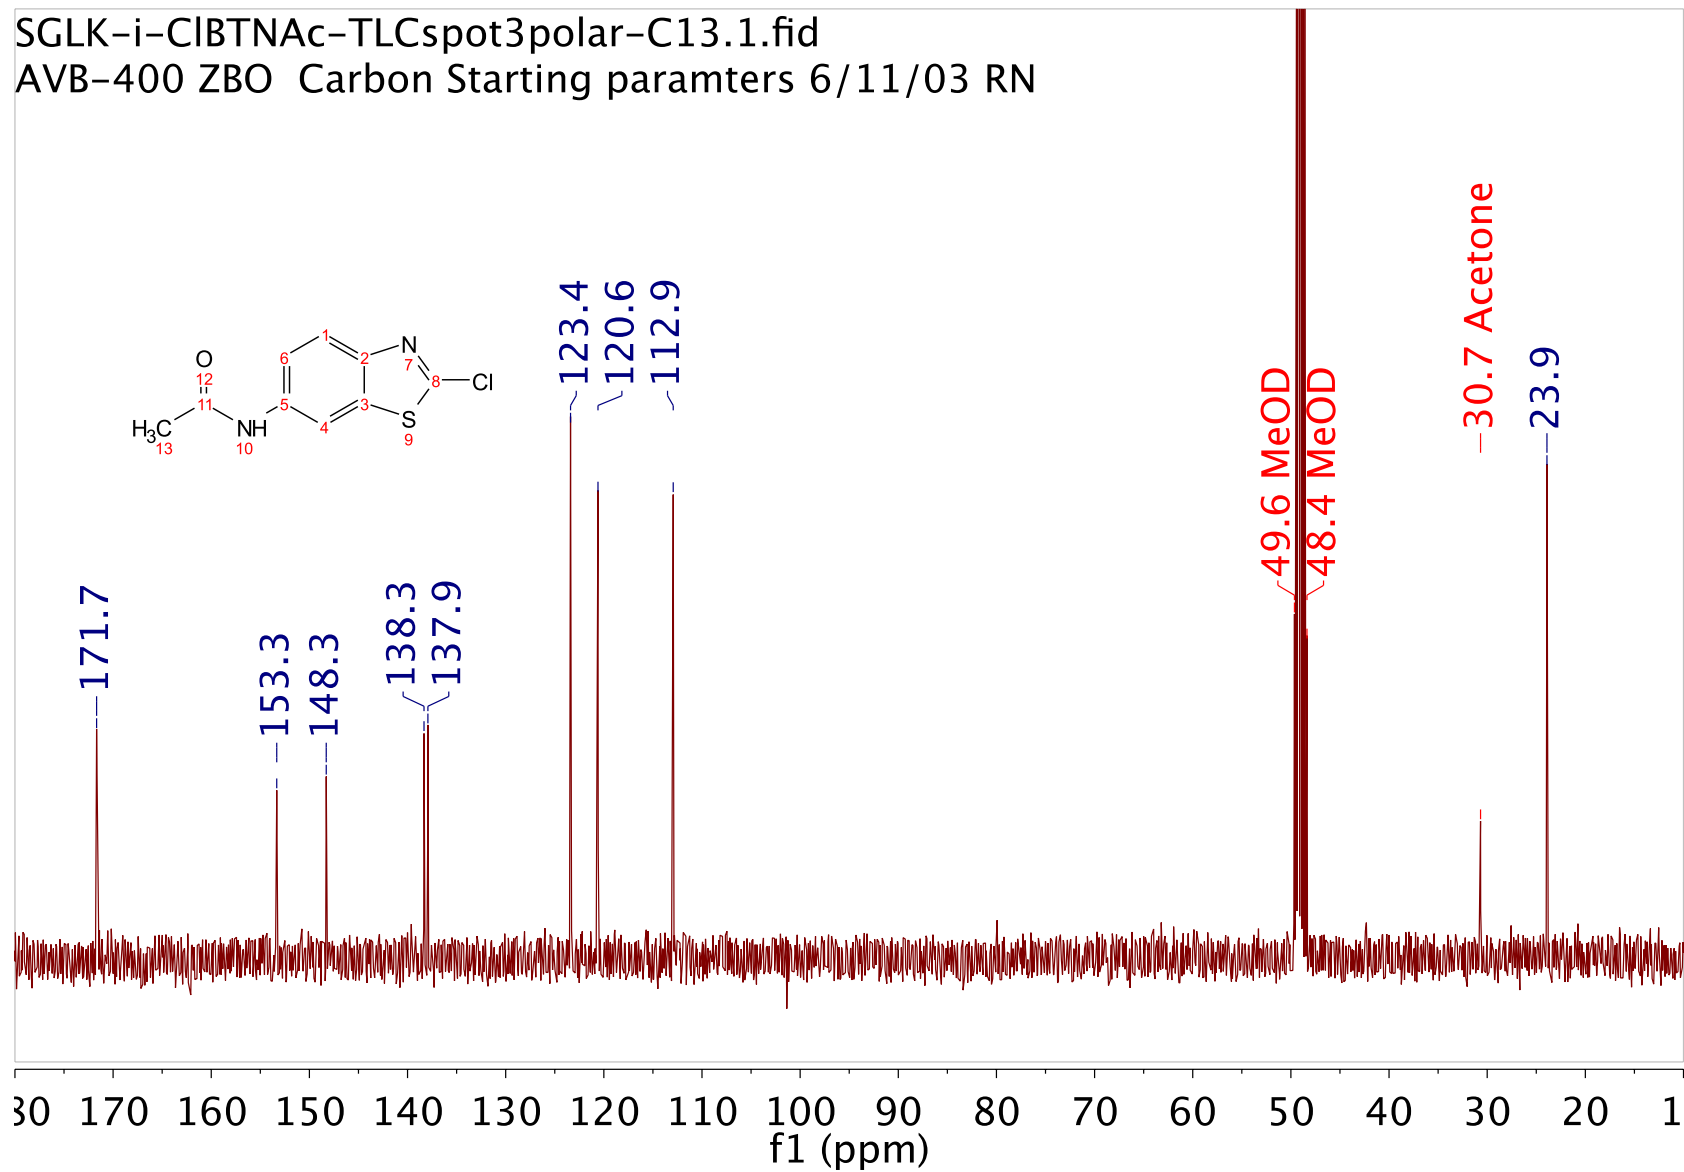

SGLK-i-CIBTNAc-TLCspot3polar-C13.1.fid  
AVB-400 ZBO Carbon Starting paramters 6/11/03 RN

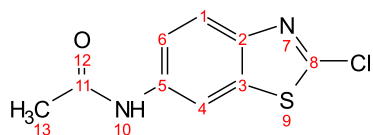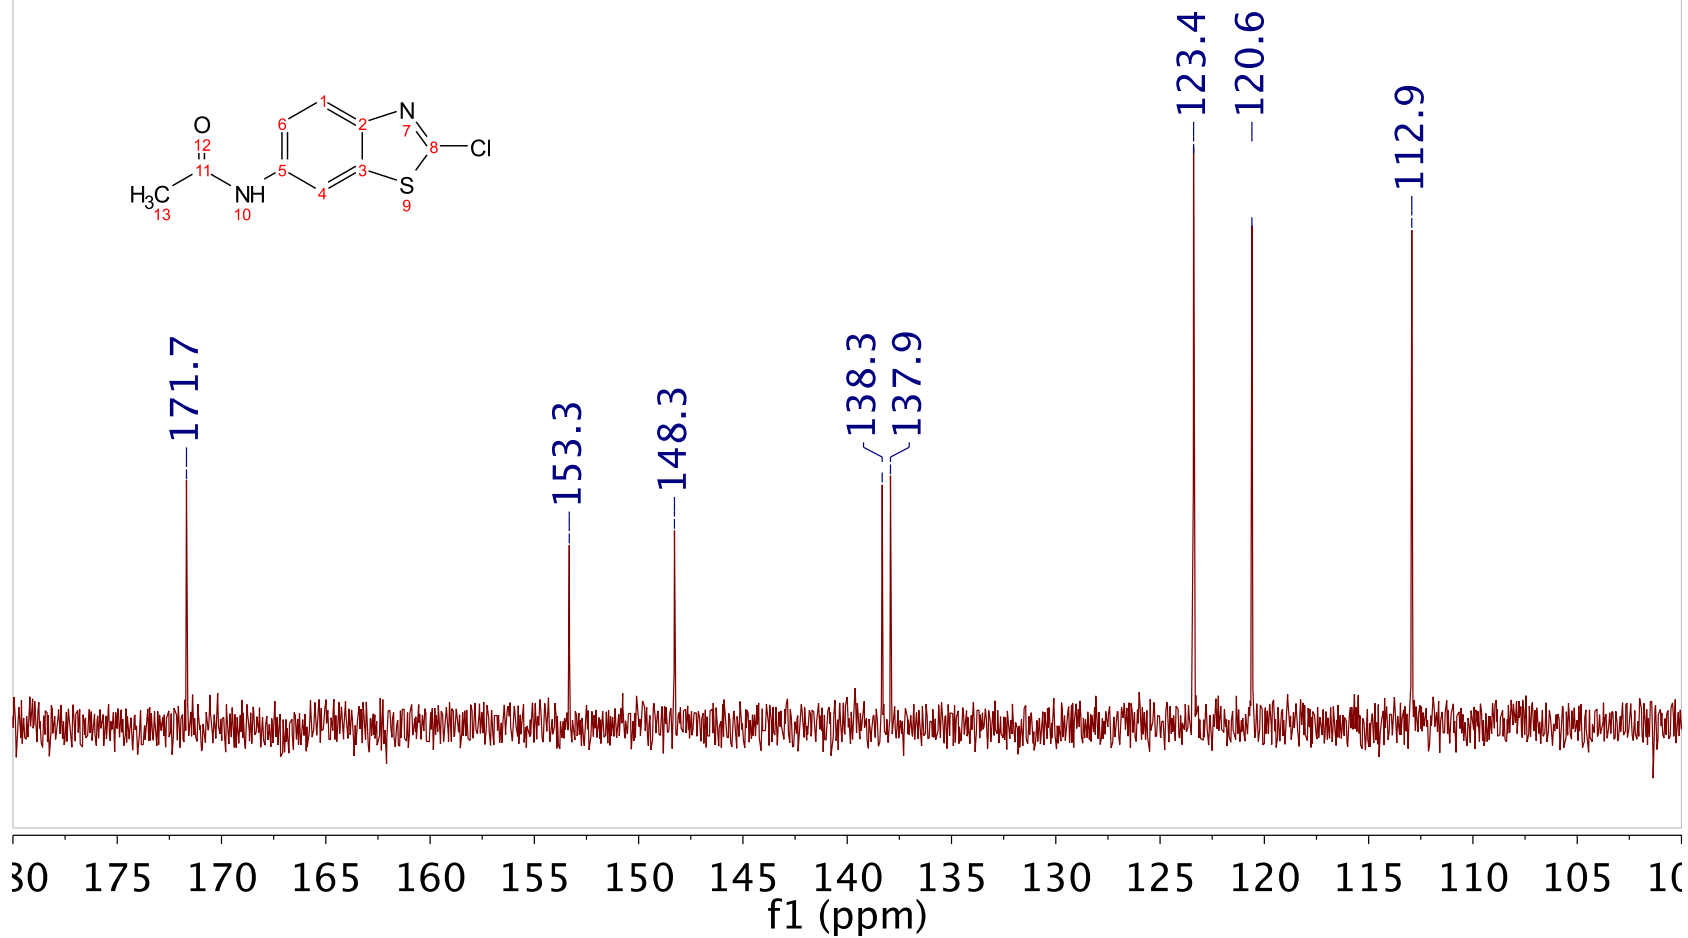

022318\_13CBTNAc\_meoh-shigemi\_acetone\_32s\_proton  
STANDARD PROTON PARAMETERS

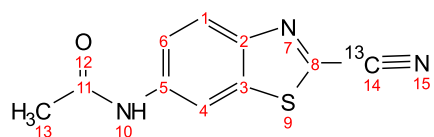

**13CBTNAc (3)**

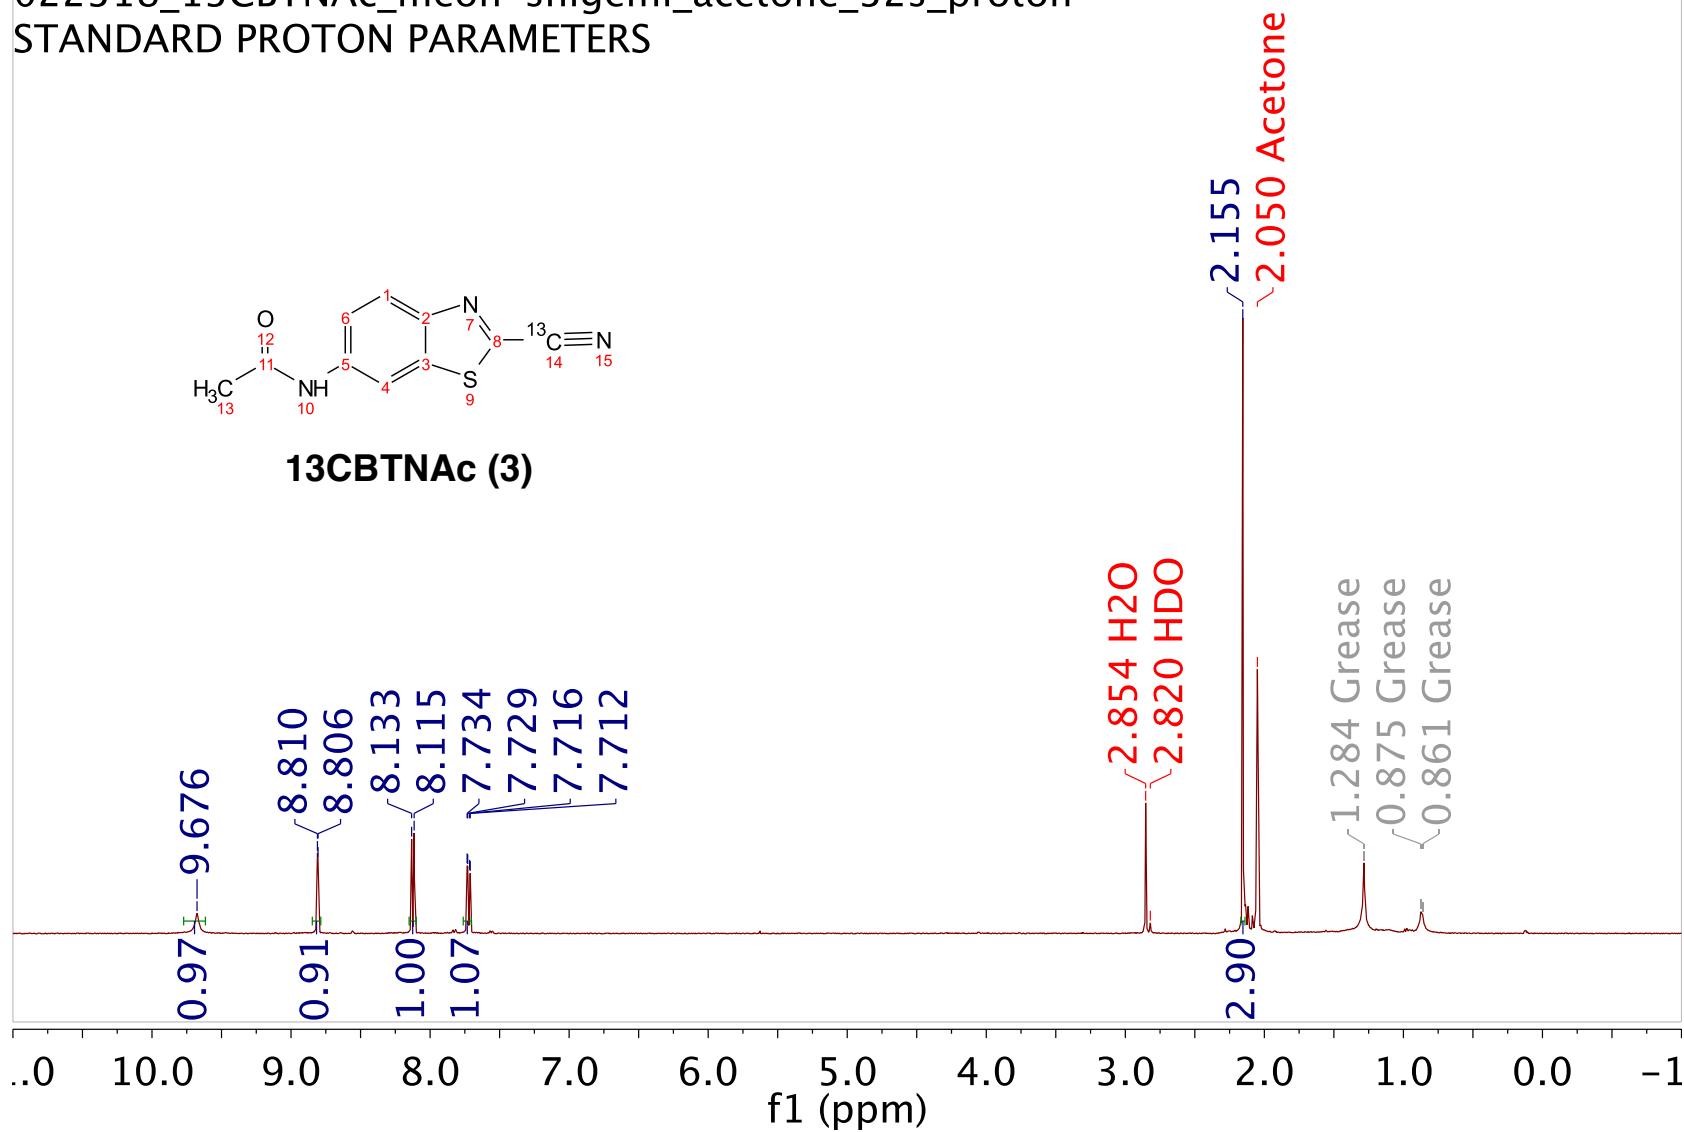

022318\_13CBTNAc\_meoh-shigemi\_acetone\_32s\_proton  
STANDARD PROTON PARAMETERS

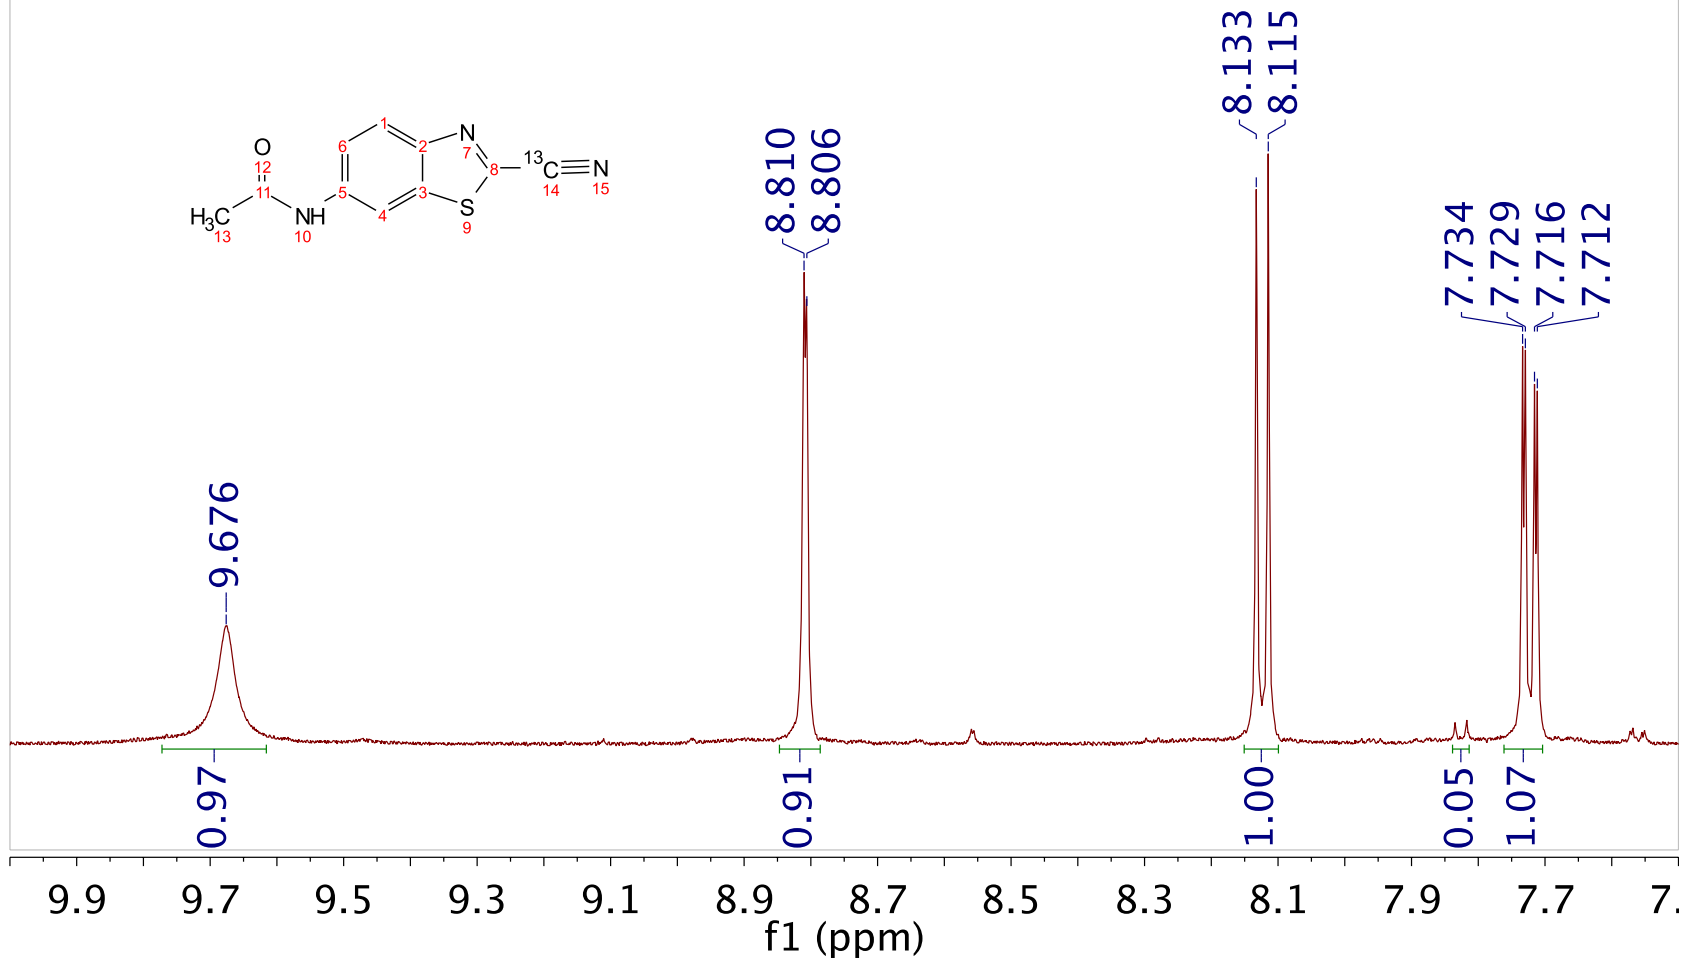

022318\_13cbtnac\_meoh-shigemi\_acetone\_d1-5s\_13C  
C13par

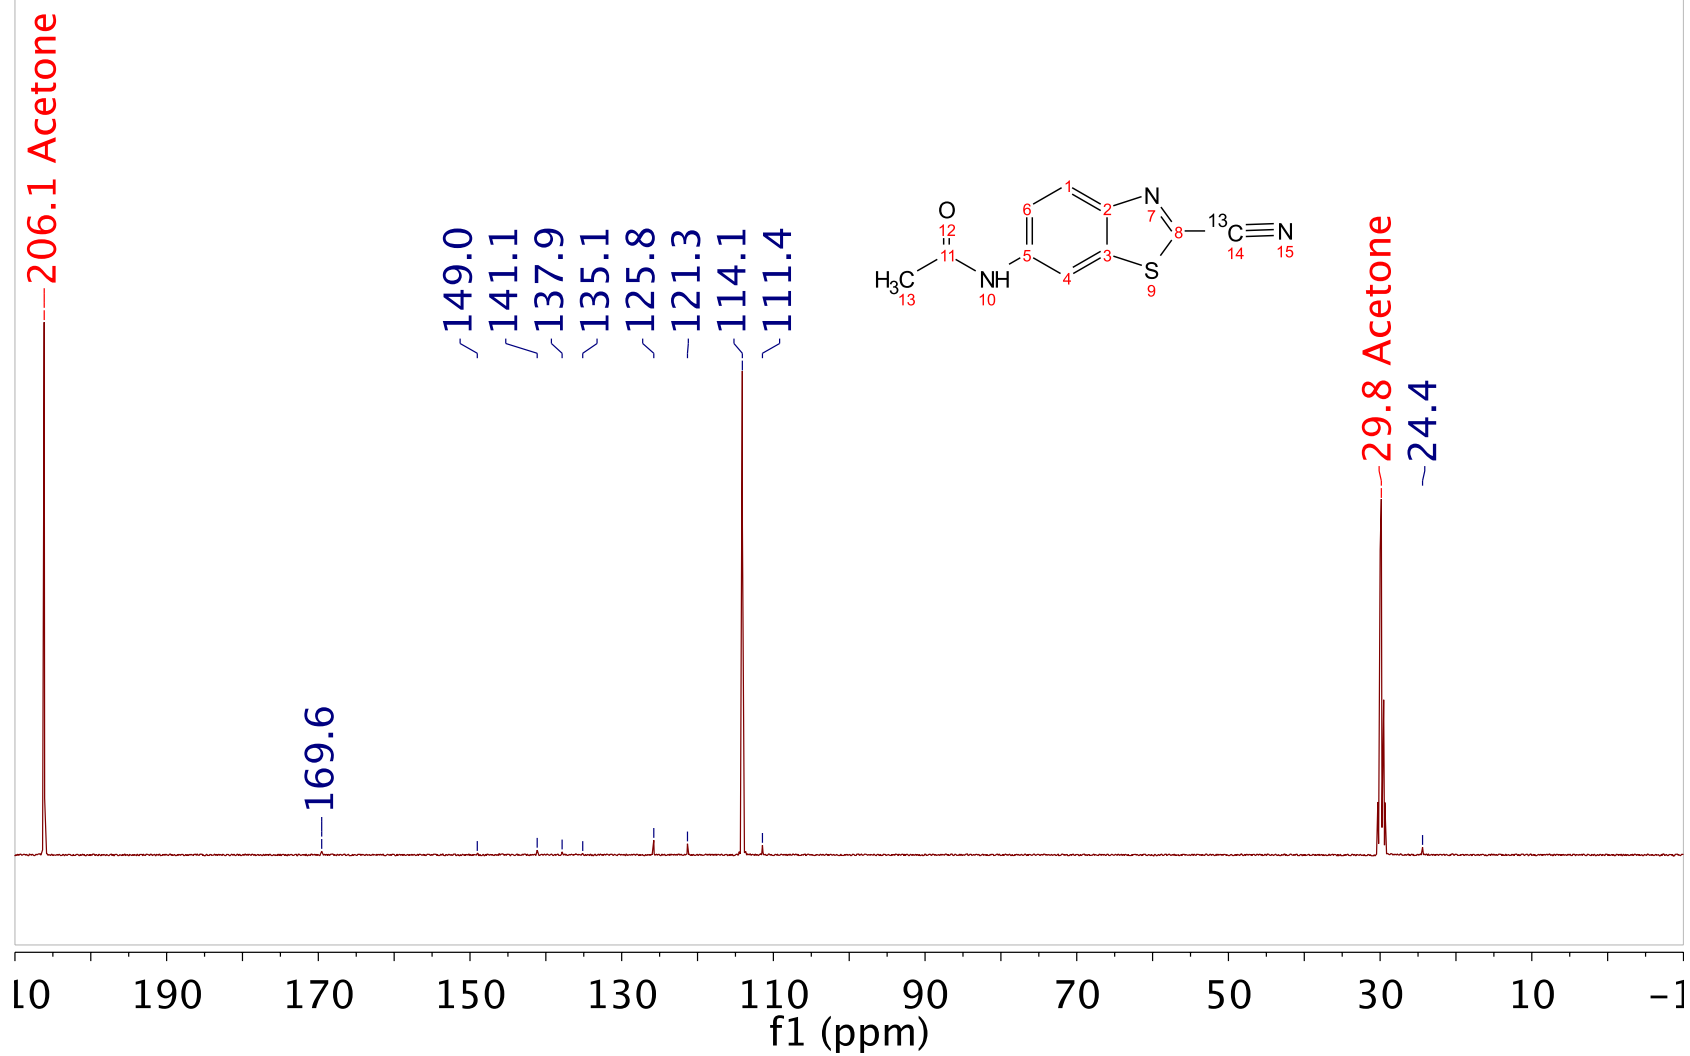

022318\_13cbtnac\_meoh-shigemi\_acetone\_d1-5s\_13C  
C13par

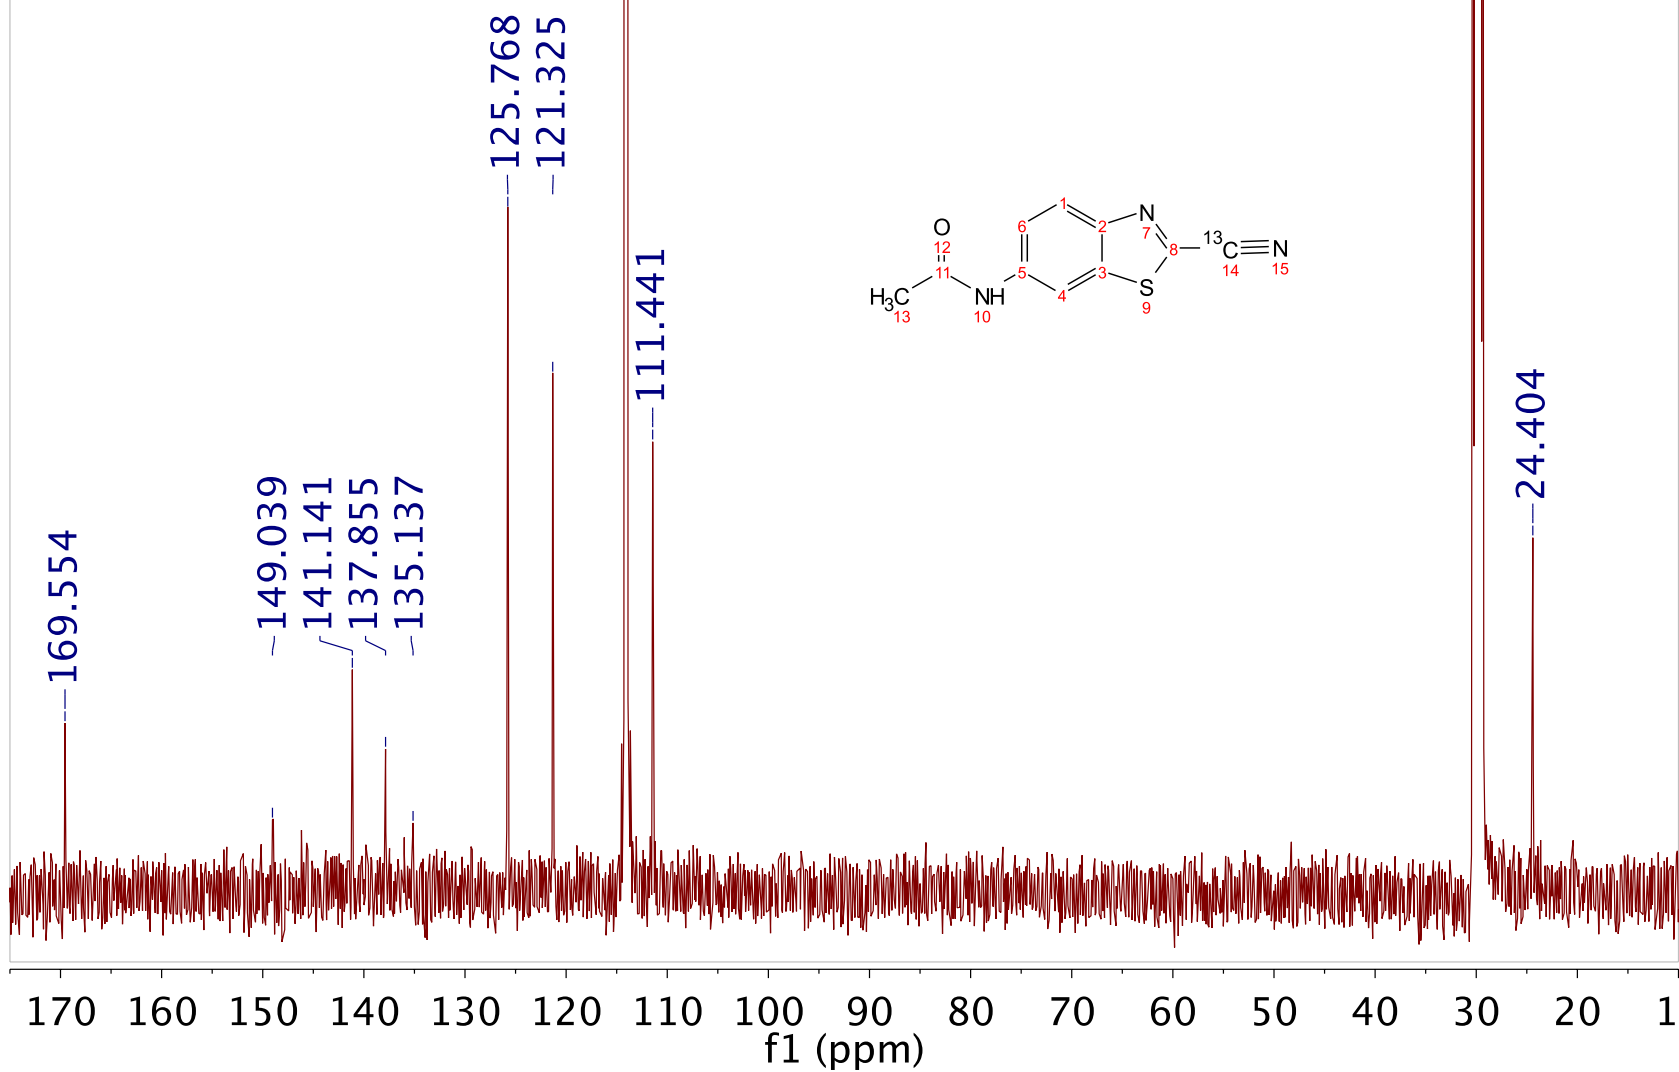

022318\_13cbtnac\_meoh-shigemi\_acetone\_d1-5s\_13C  
C13par

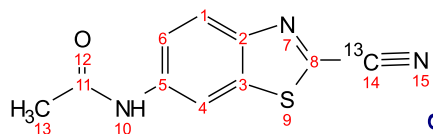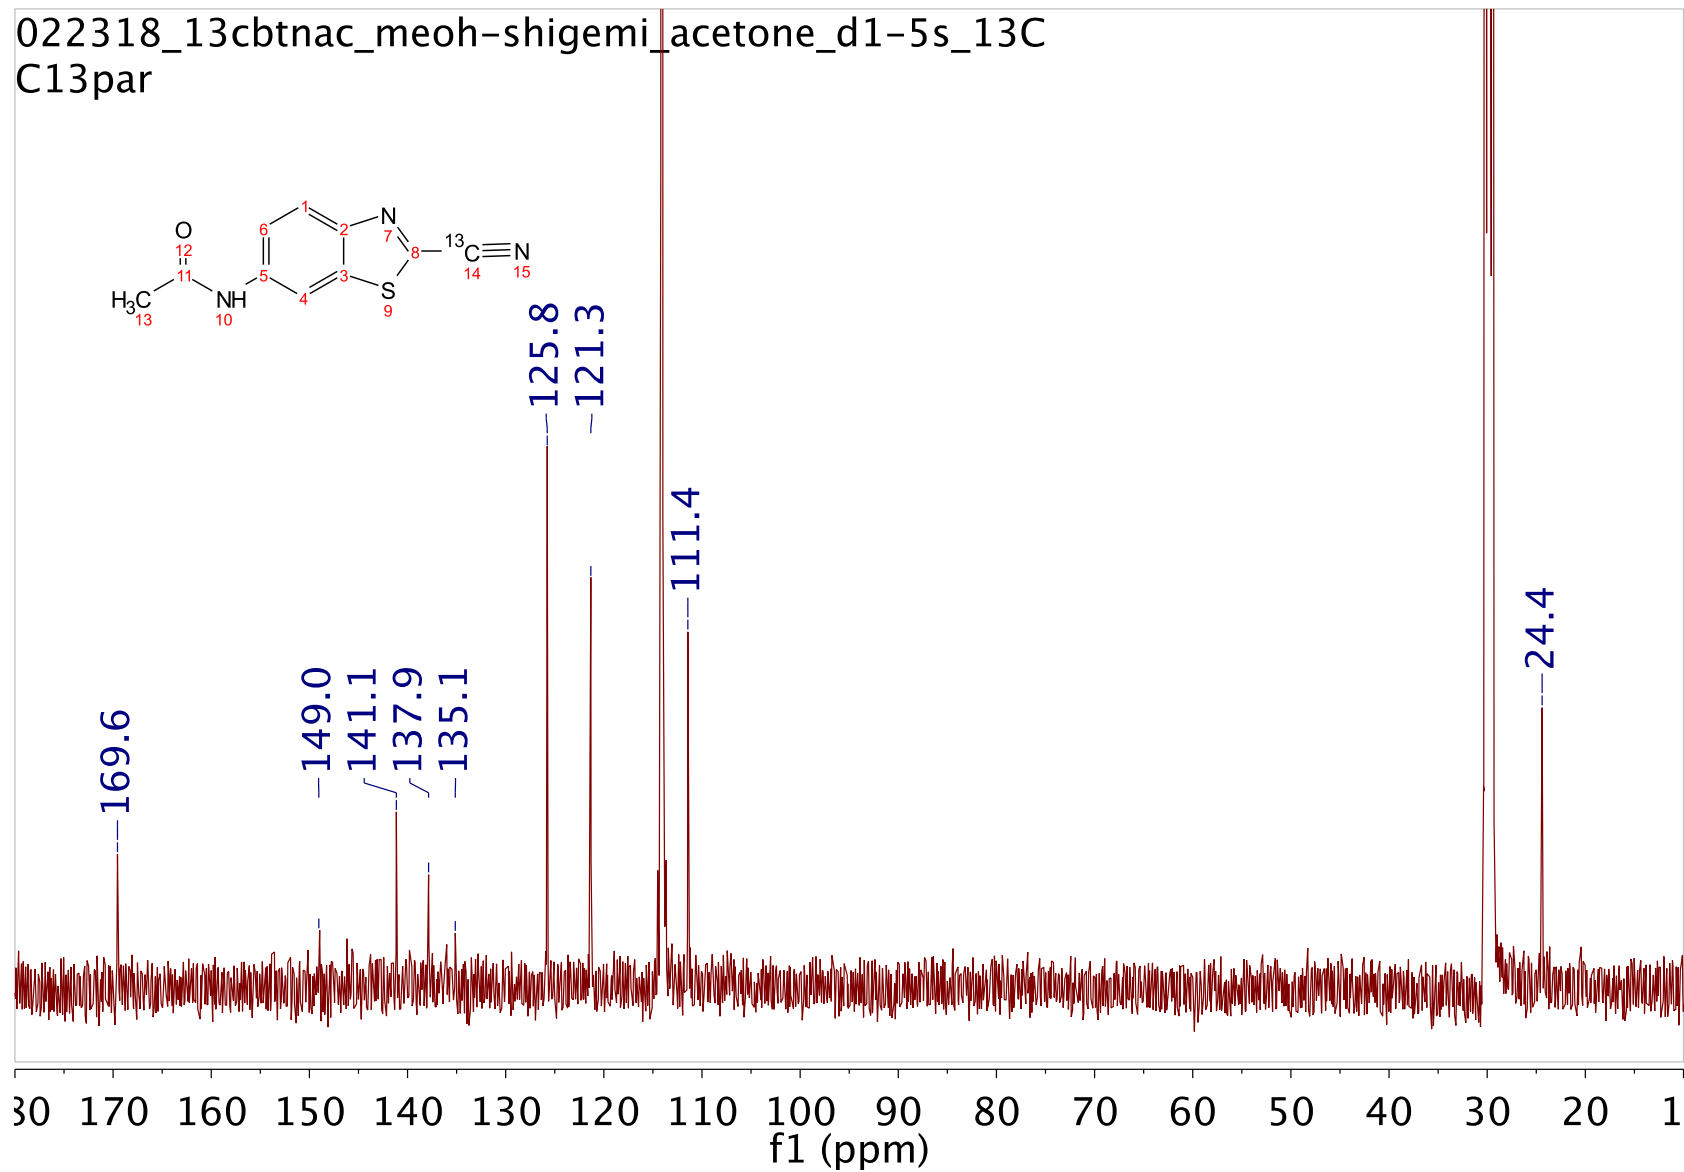

160622\_PEPFOLD-3\_1H1Dpr\_25C  
 PEPFOLD-3 (acetyl-GGHPDPCPKGG=amide) - 6/22/16  
 ~7.4 mM in 10% D2O, pH 3.98  
 Presat Water Suppression Spectrum

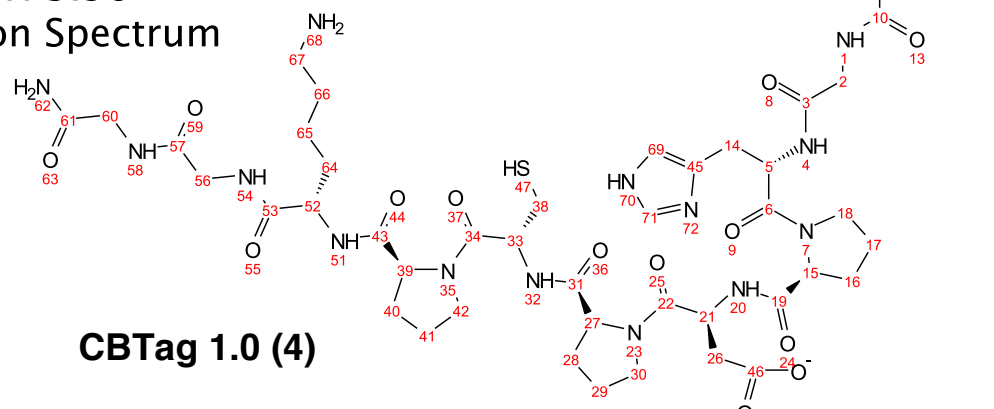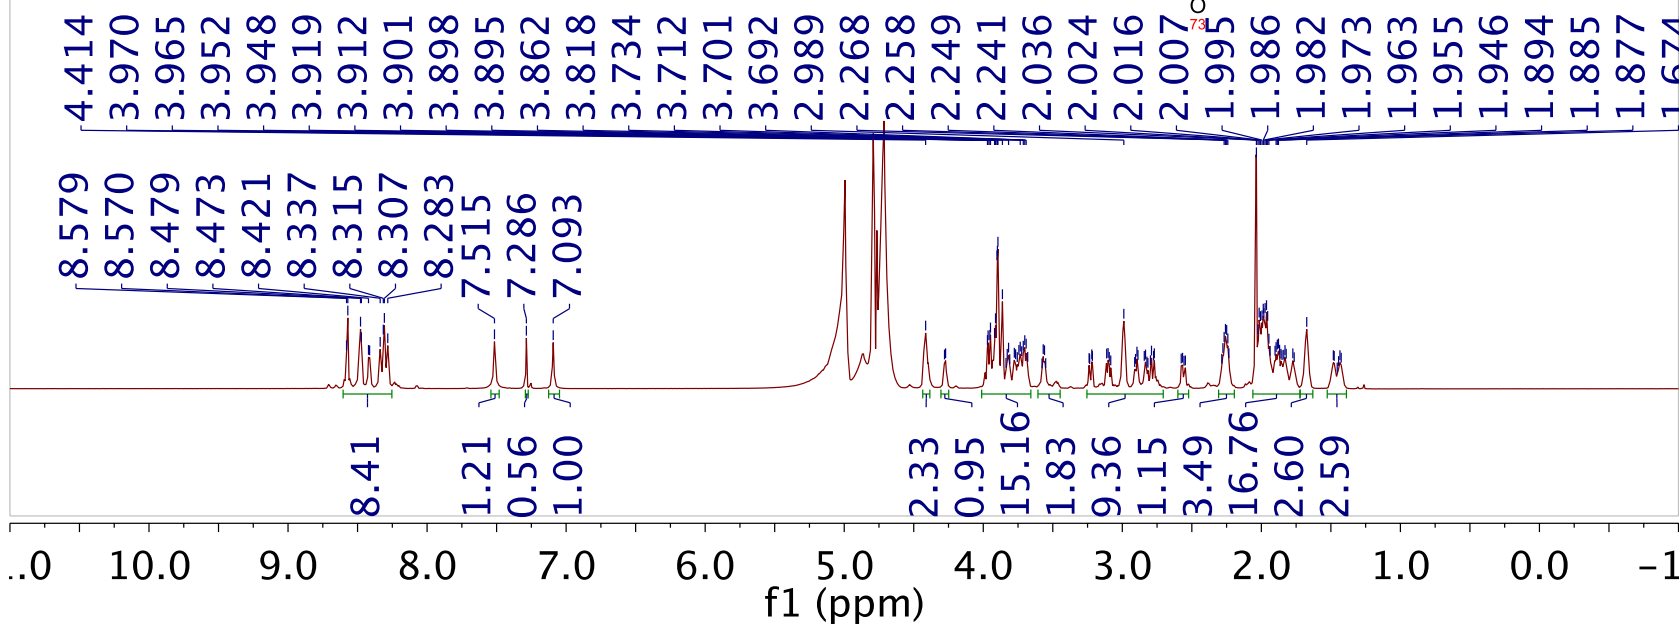



160622\_PEPFOLD-3\_1H1Dpr\_25C  
PEPFOLD-3 (acetyl-GGHPDPCPKGG=amide) - 6/22/16  
~7.4 mM in 10% D2O, pH 3.98  
Presat Water Suppression Spectrum

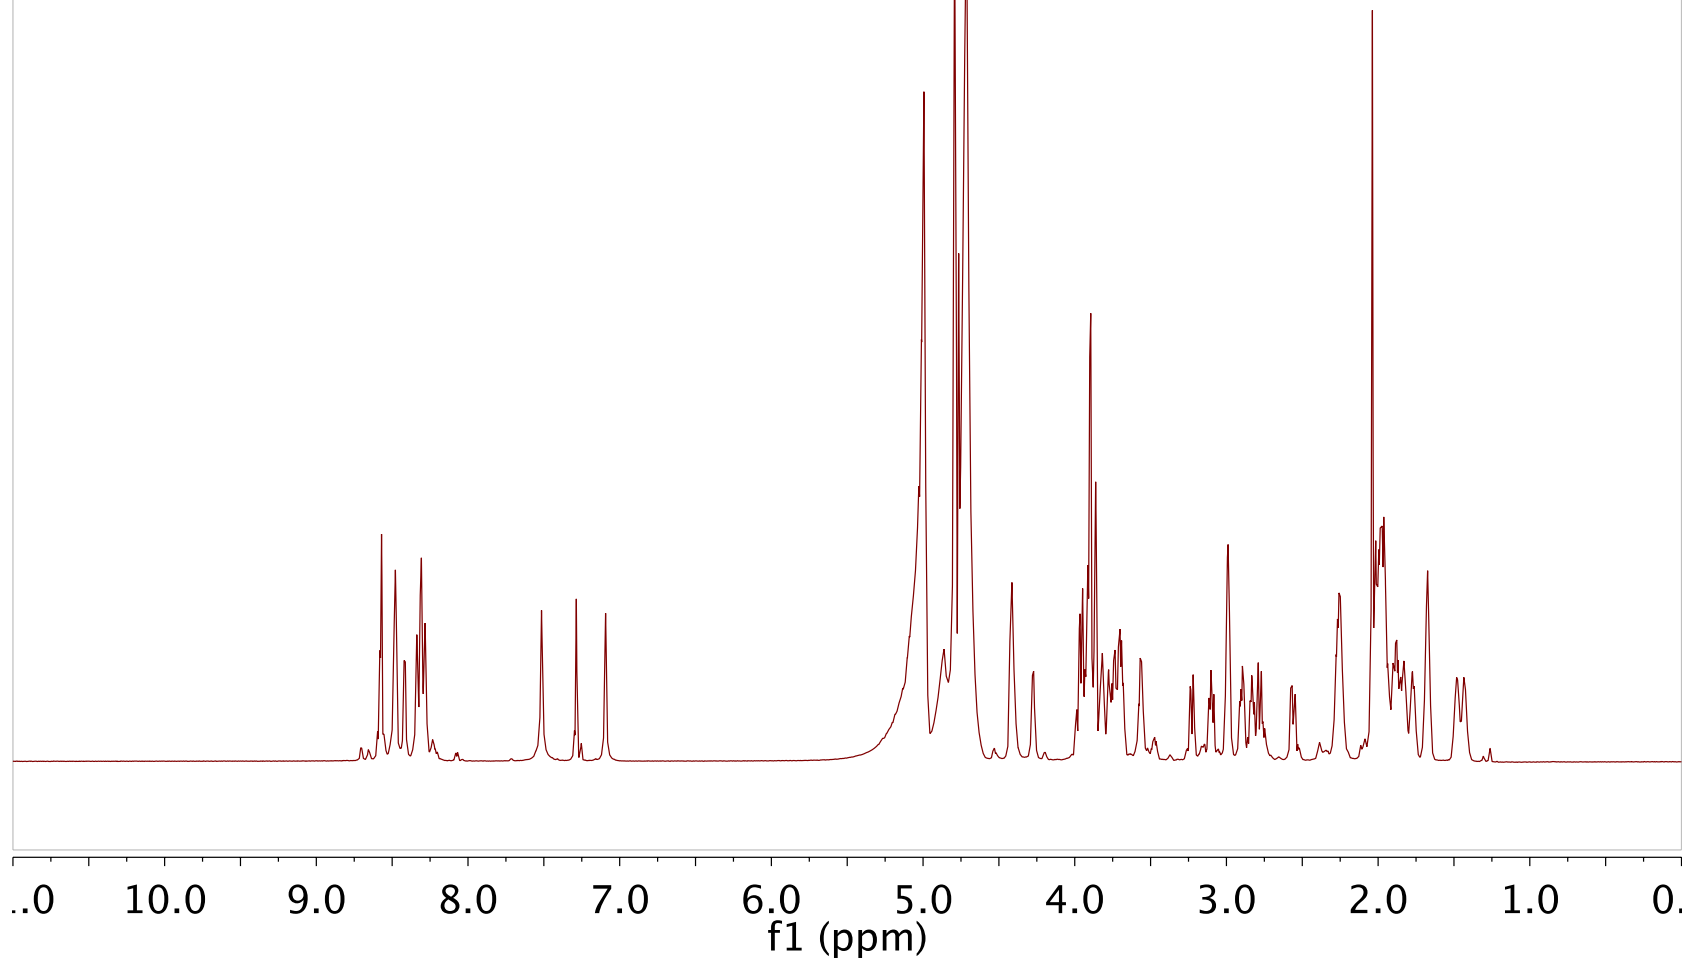

160622\_PEPFOLD-3\_1H1Dpr\_25C  
PEPFOLD-3 (acetyl-GGHPDPCPKGG=amide) - 6/22/16  
~7.4 mM in 10% D2O, pH 3.98  
Presat Water Suppression Spectrum

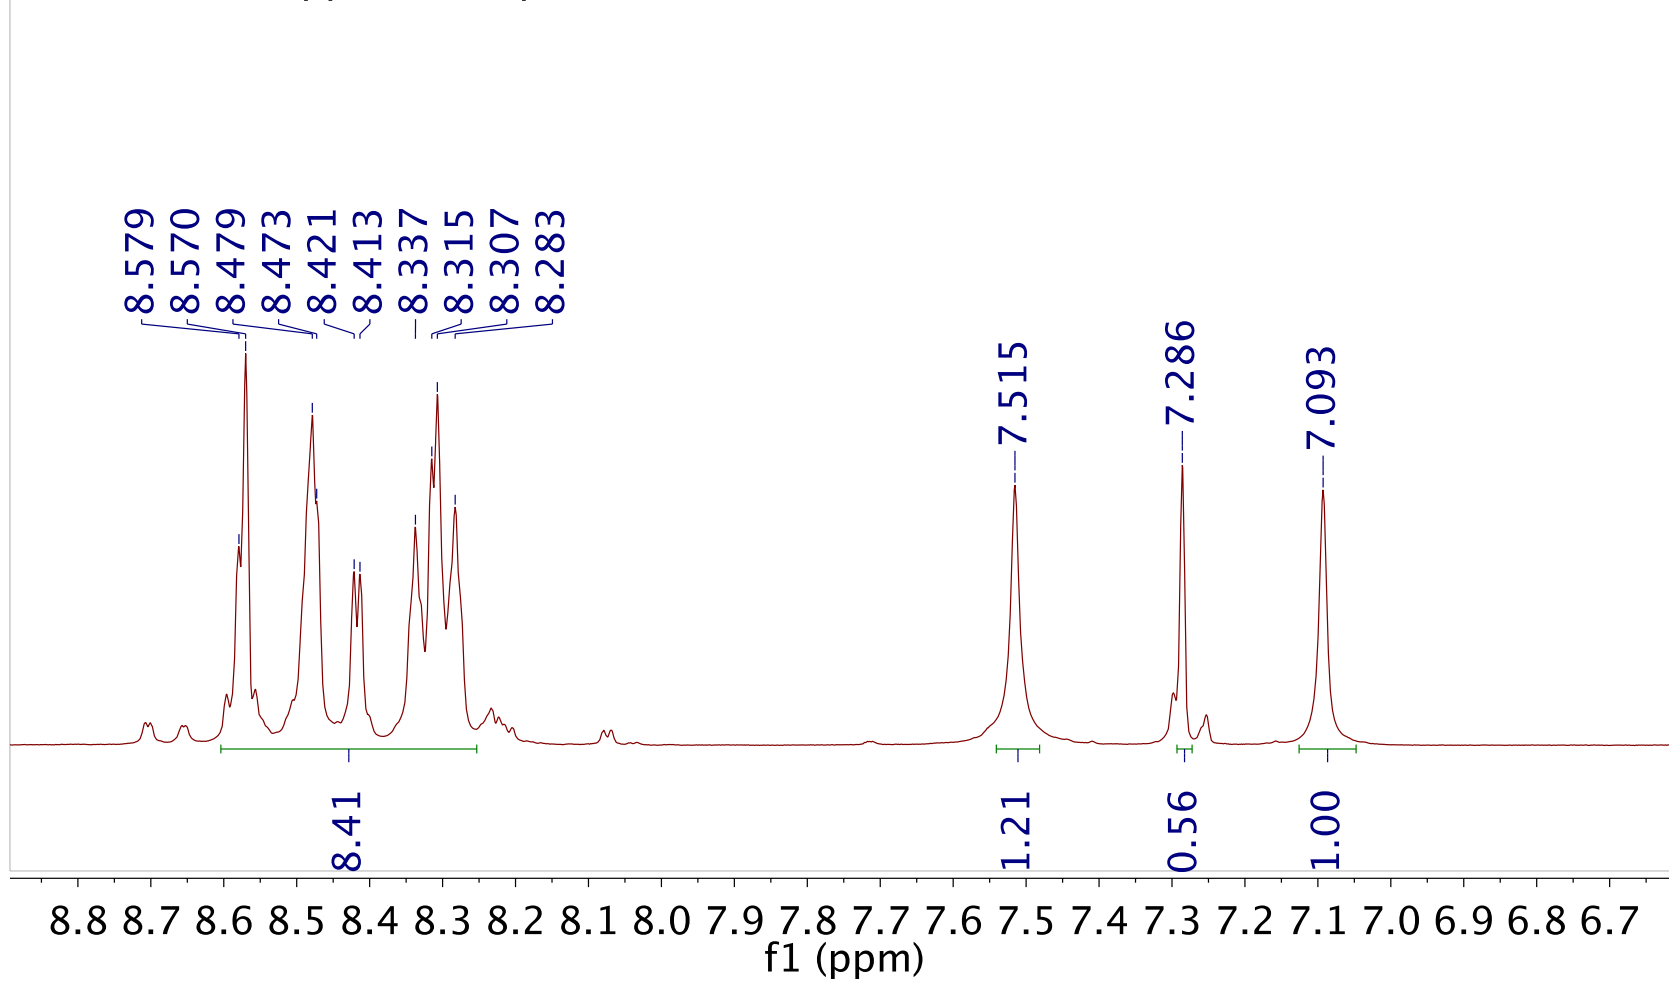

160622\_PEPFOLD-3\_1H1Dpr\_25C  
PEPFOLD-3 (acetyl-GGHPDPCPKGG=amide) - 6/22/16  
~7.4 mM in 10% D2O, pH 3.98  
Presat Water Suppression Spectrum

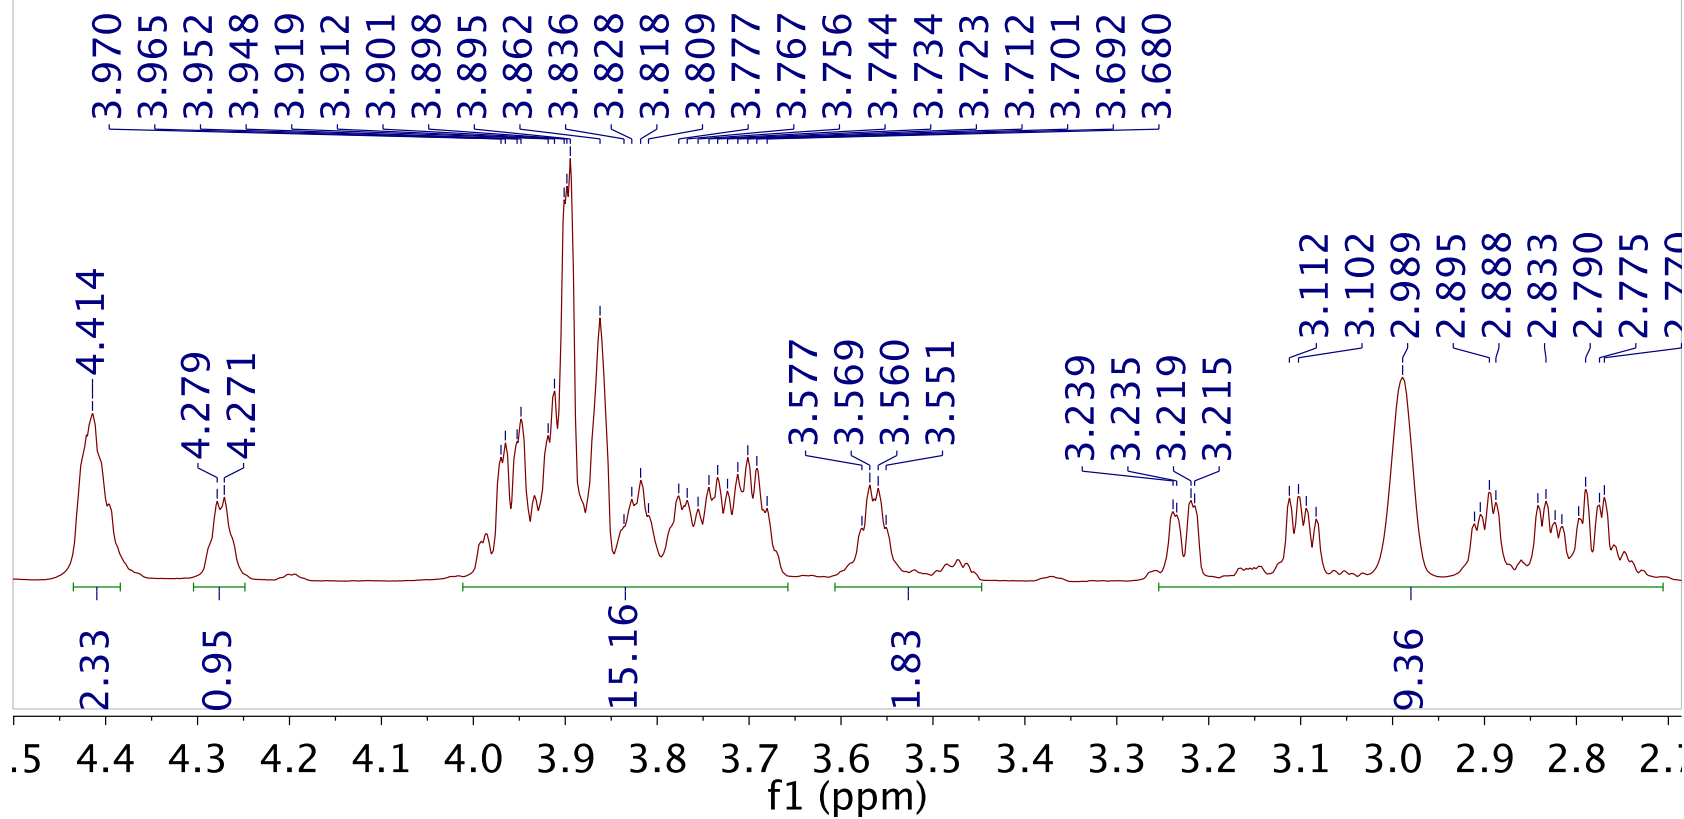

160622\_PEPFOLD-3\_1H1Dpr\_25C  
 PEPFOLD-3 (acetyl-GGHPDPCPKGG=amide) - 6/22/16  
 ~7.4 mM in 10% D2O, pH 3.98  
 Presat Water Suppression Spectrum

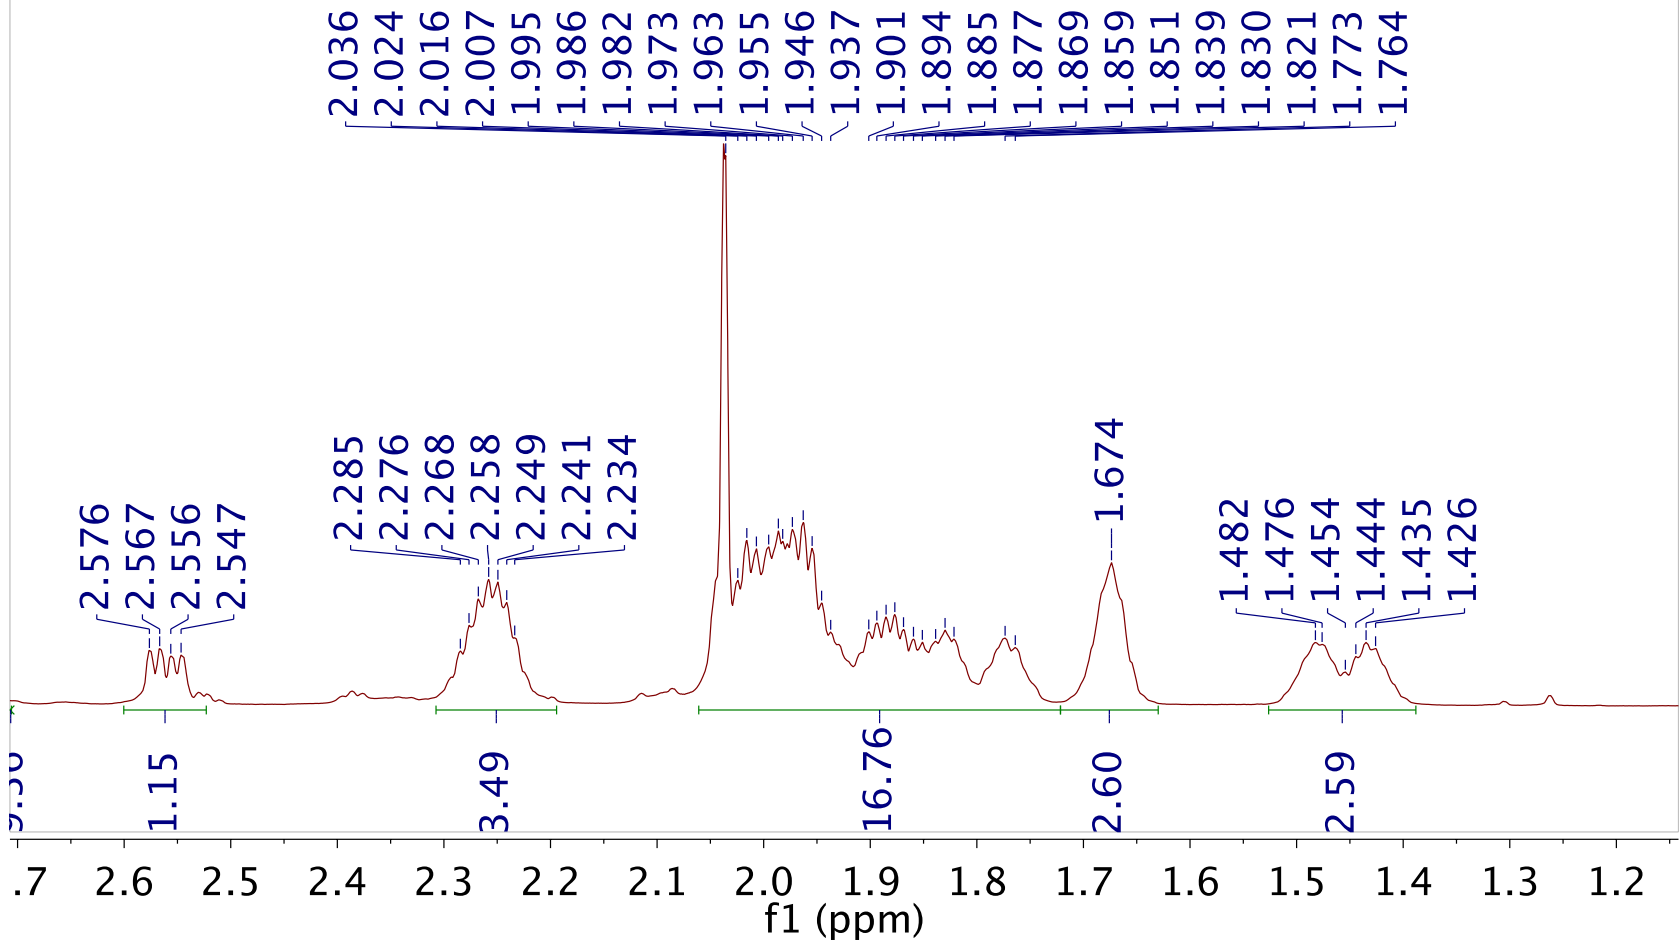

060816\_PEPFOLD-3\_100mM\_water\_13C\_240scans  
C13par

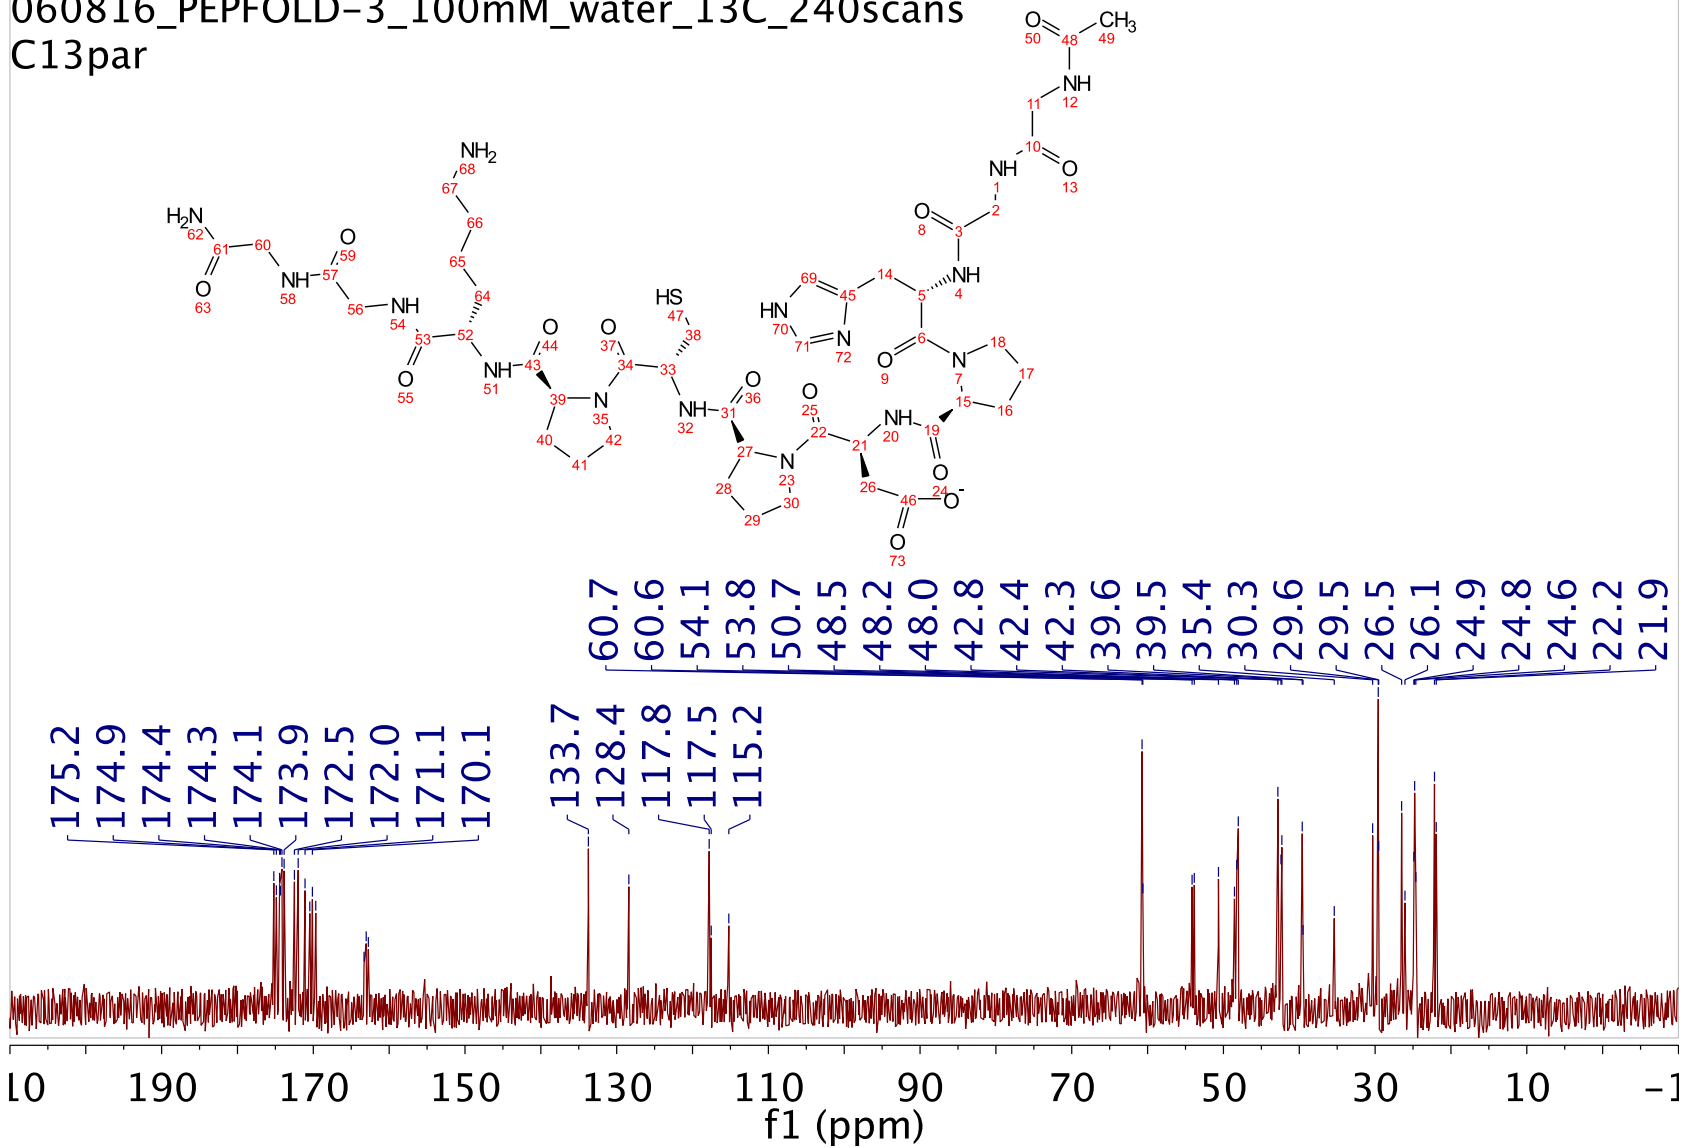

060816\_PEPFOLD-3\_100mM\_water\_13C\_240scans  
C13par

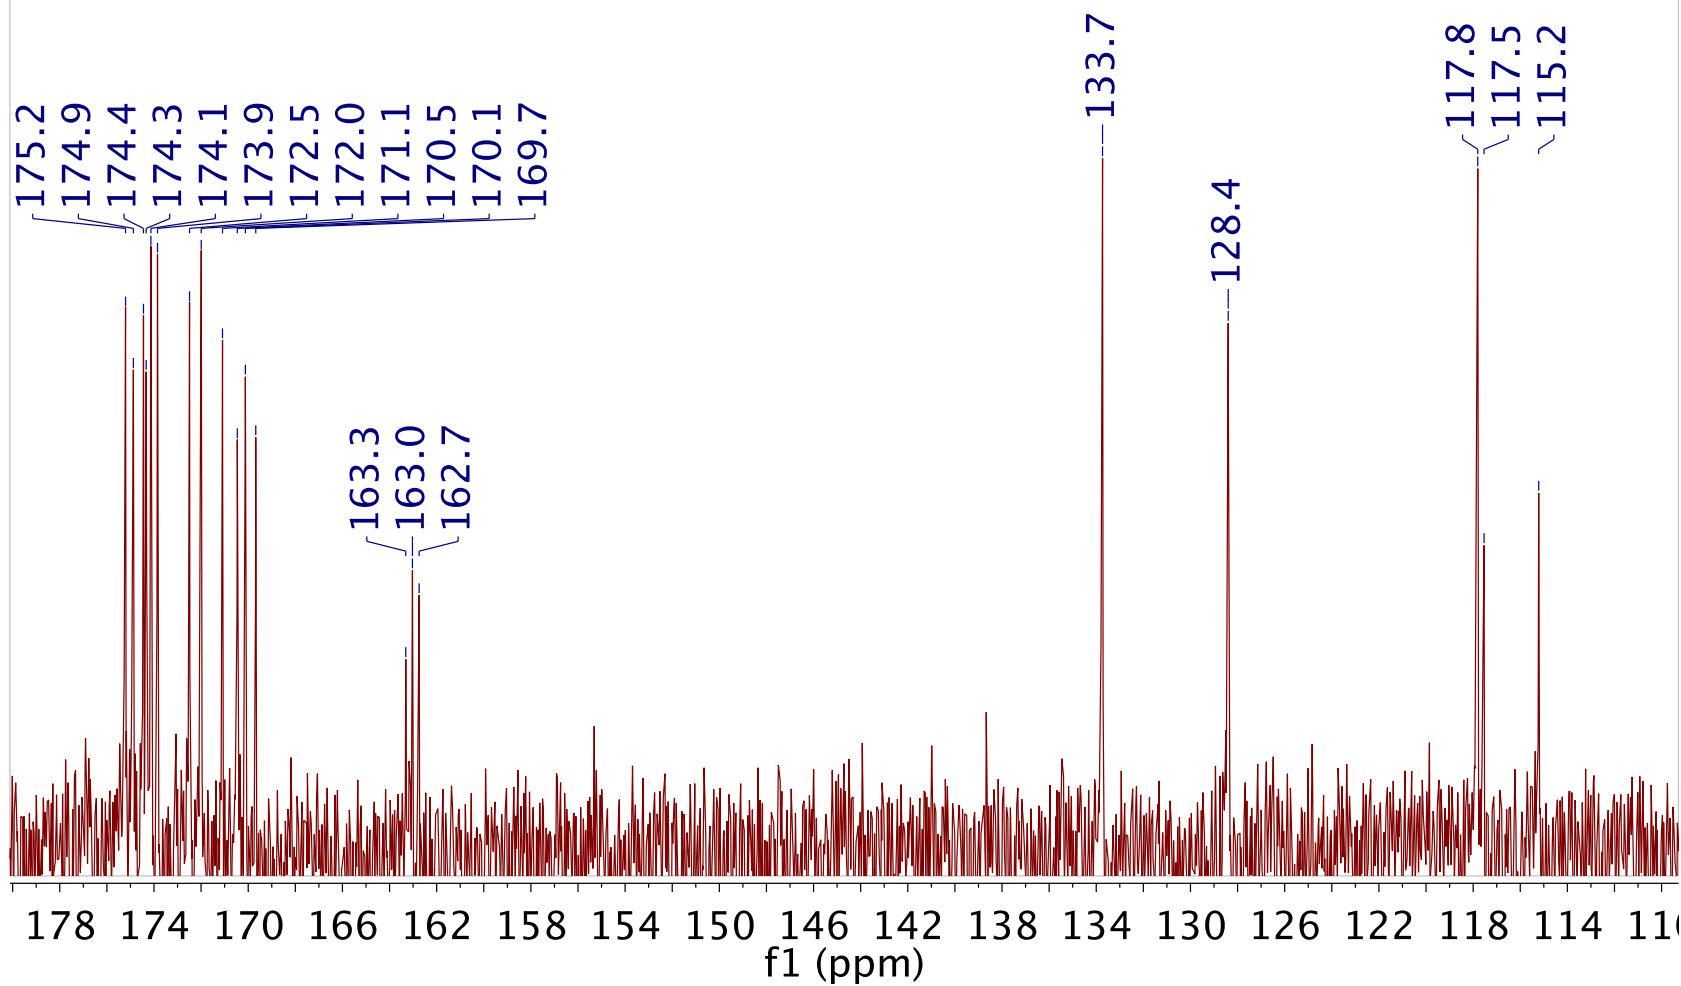

060816\_PEPFOLD-3\_100mM\_water\_13C\_240scans  
C13par

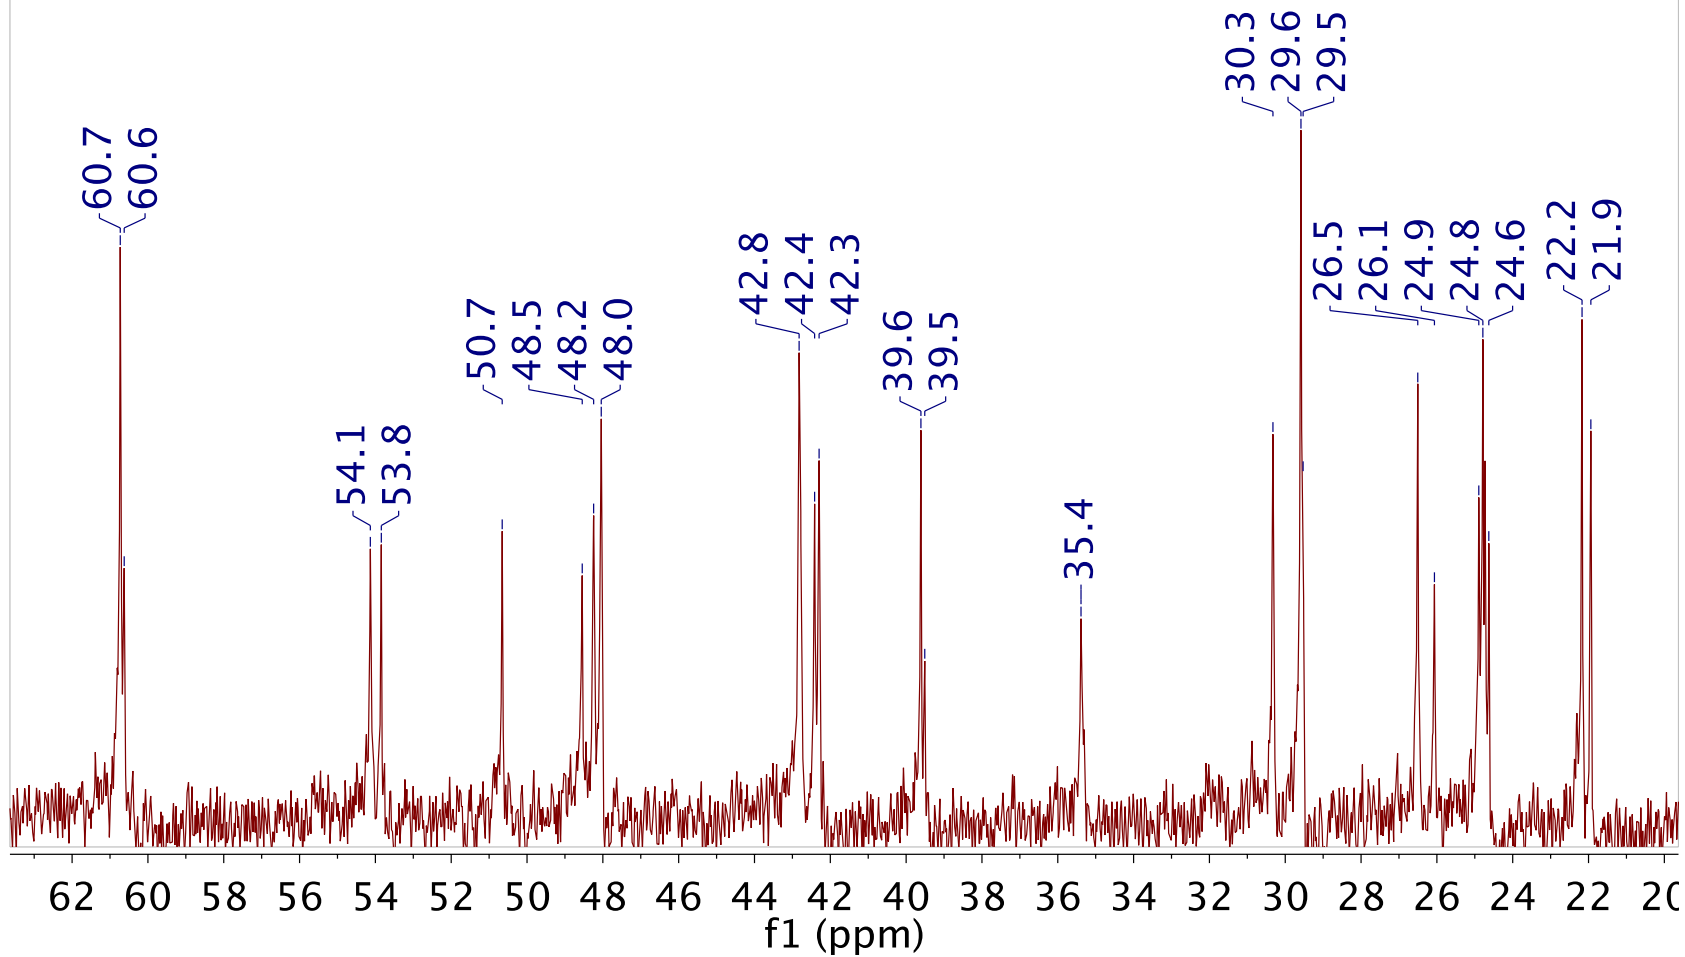

PEPFOLD-3-13CBTNAc-presat-1D  
PEPFOLD-3-13CBTNAc-presat-1D

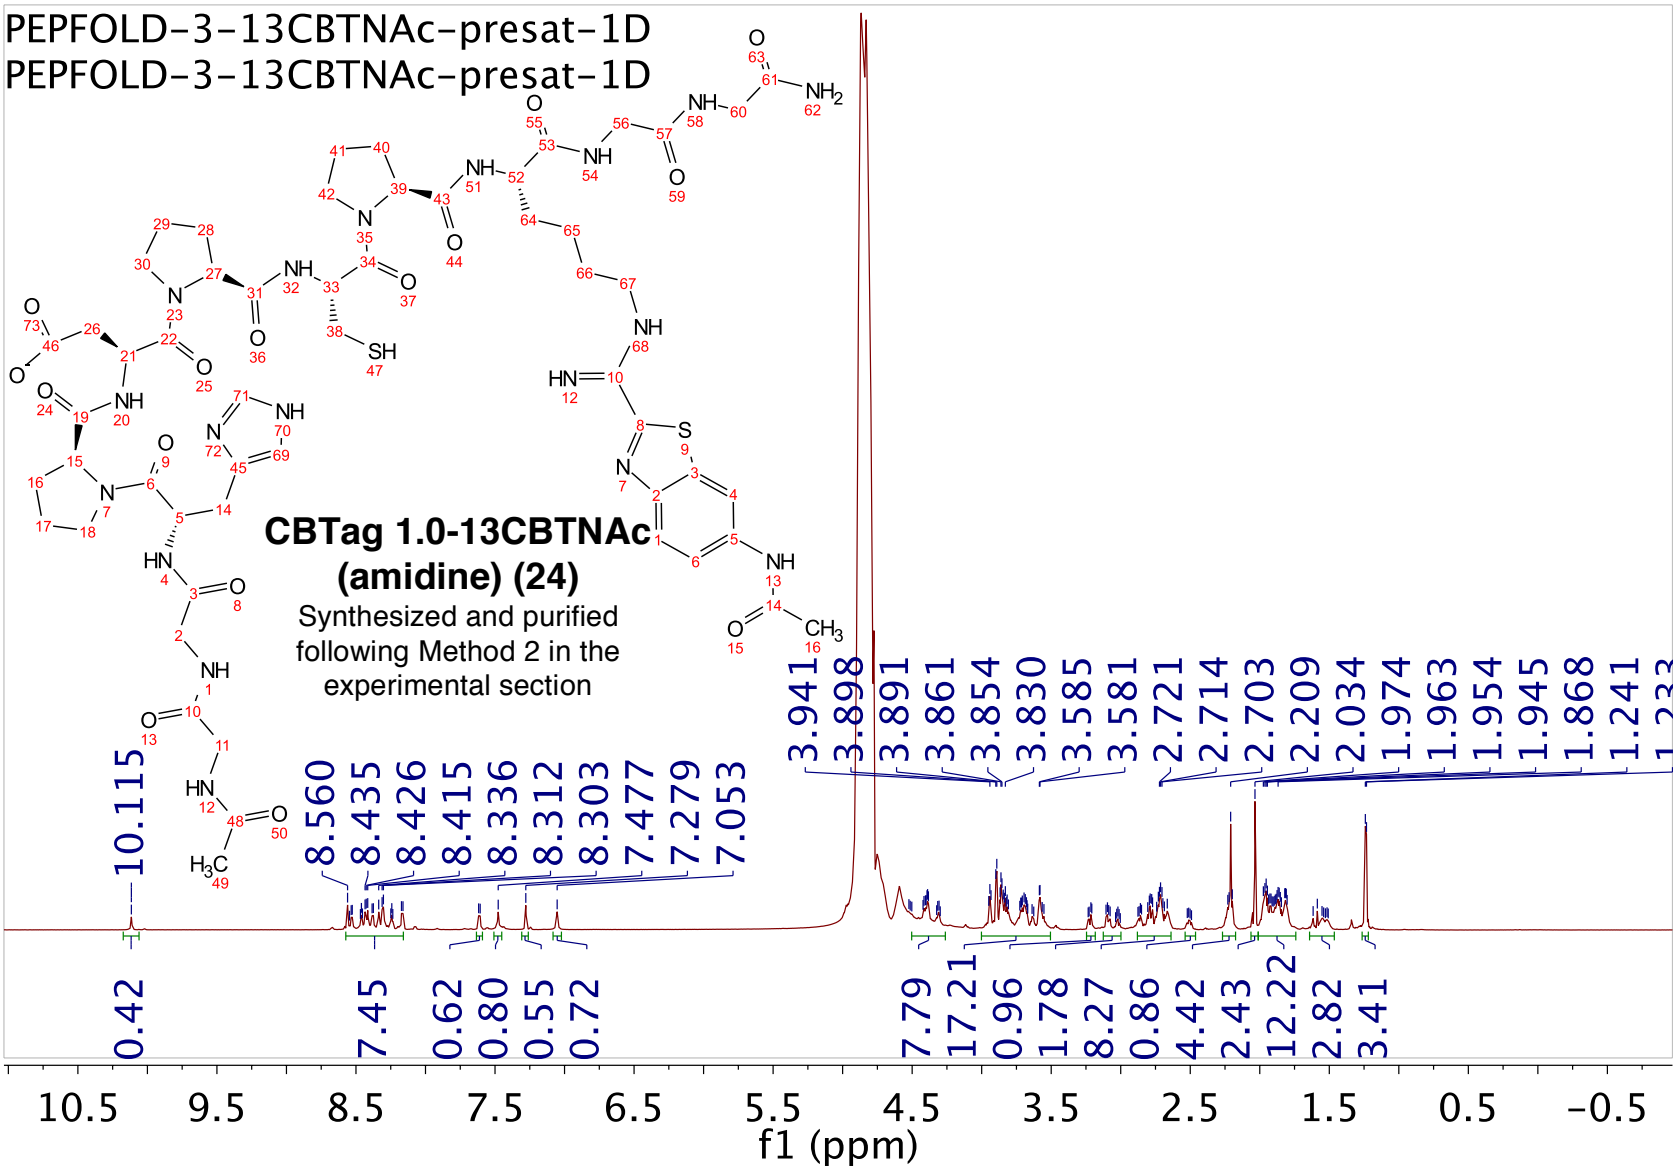



PEPFOLD-3-13CBTNAc-presat-1D  
PEPFOLD-3-13CBTNAc-presat-1D  
080516 800

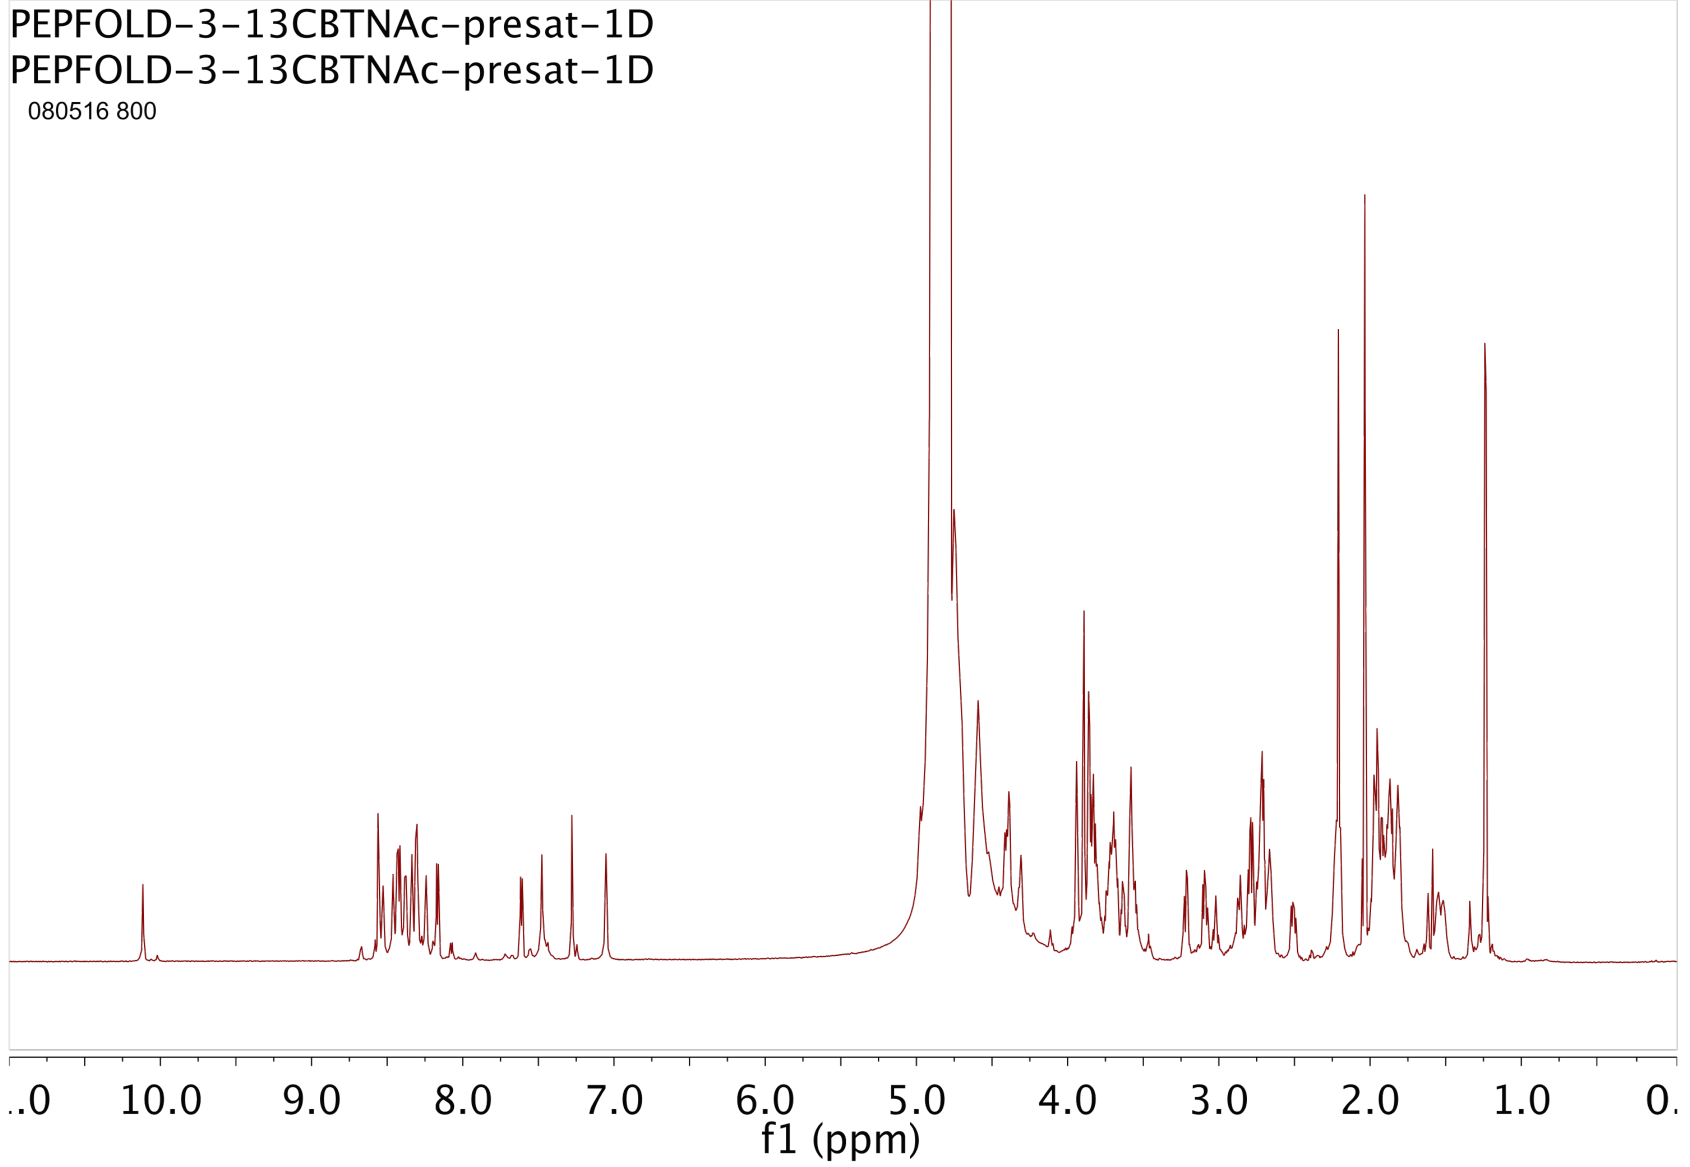

PEPFOLD-3-13CBTNAC-presat-1D  
PEPFOLD-3-13CBTNAC-presat-1D

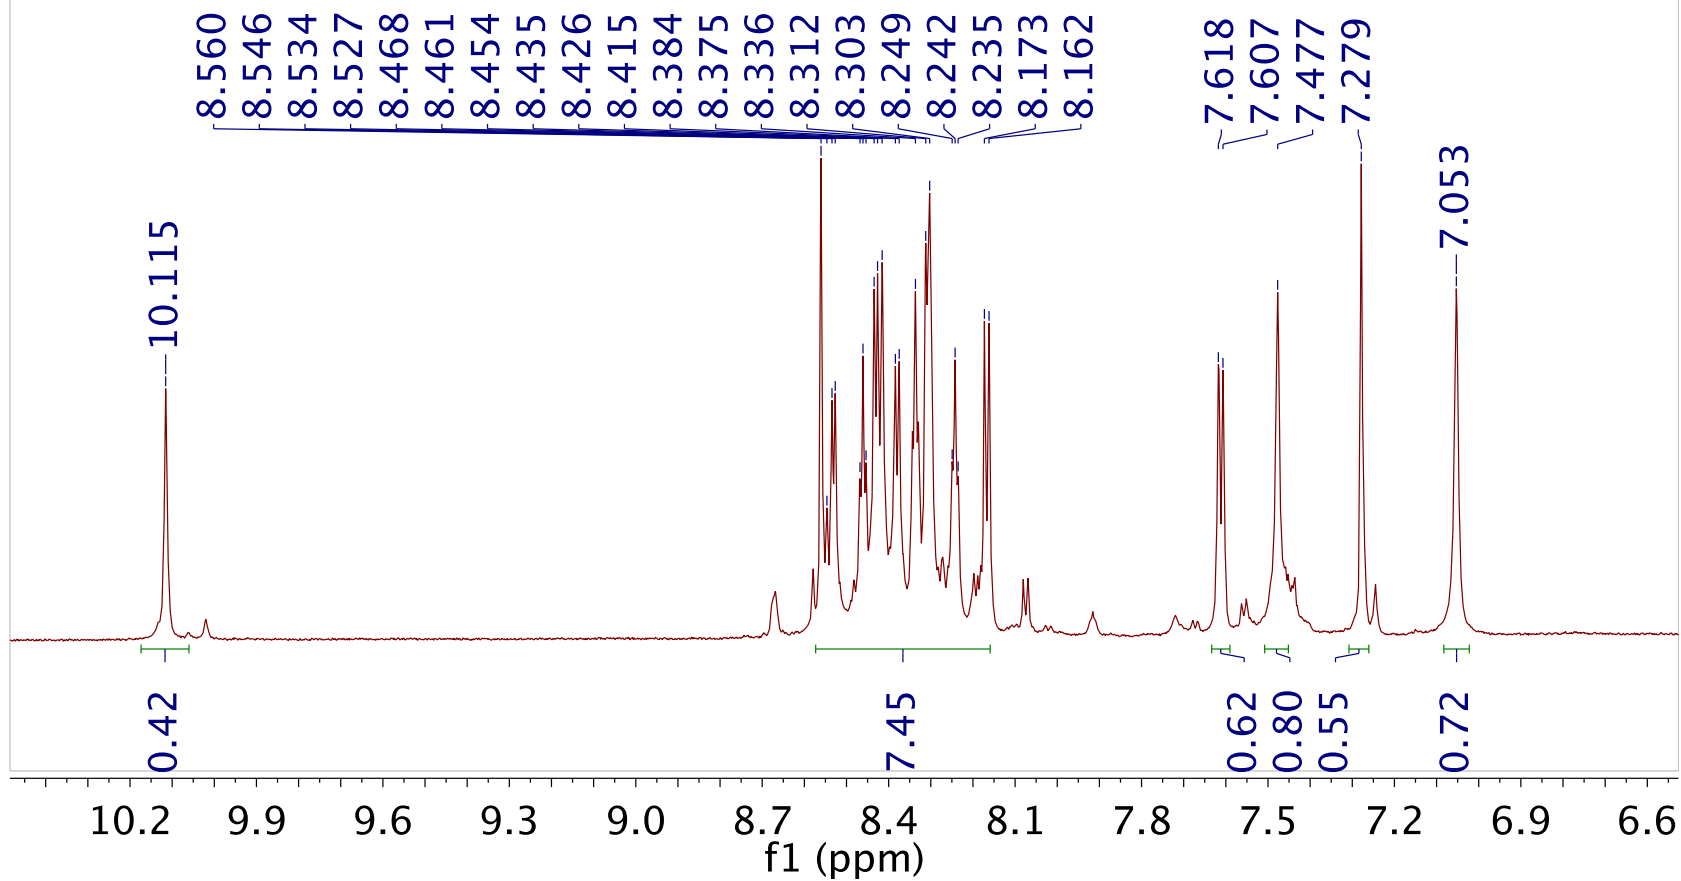

PEPFOLD-3-13CBTNAc-presat-1D  
PEPFOLD-3-13CBTNAc-presat-1D

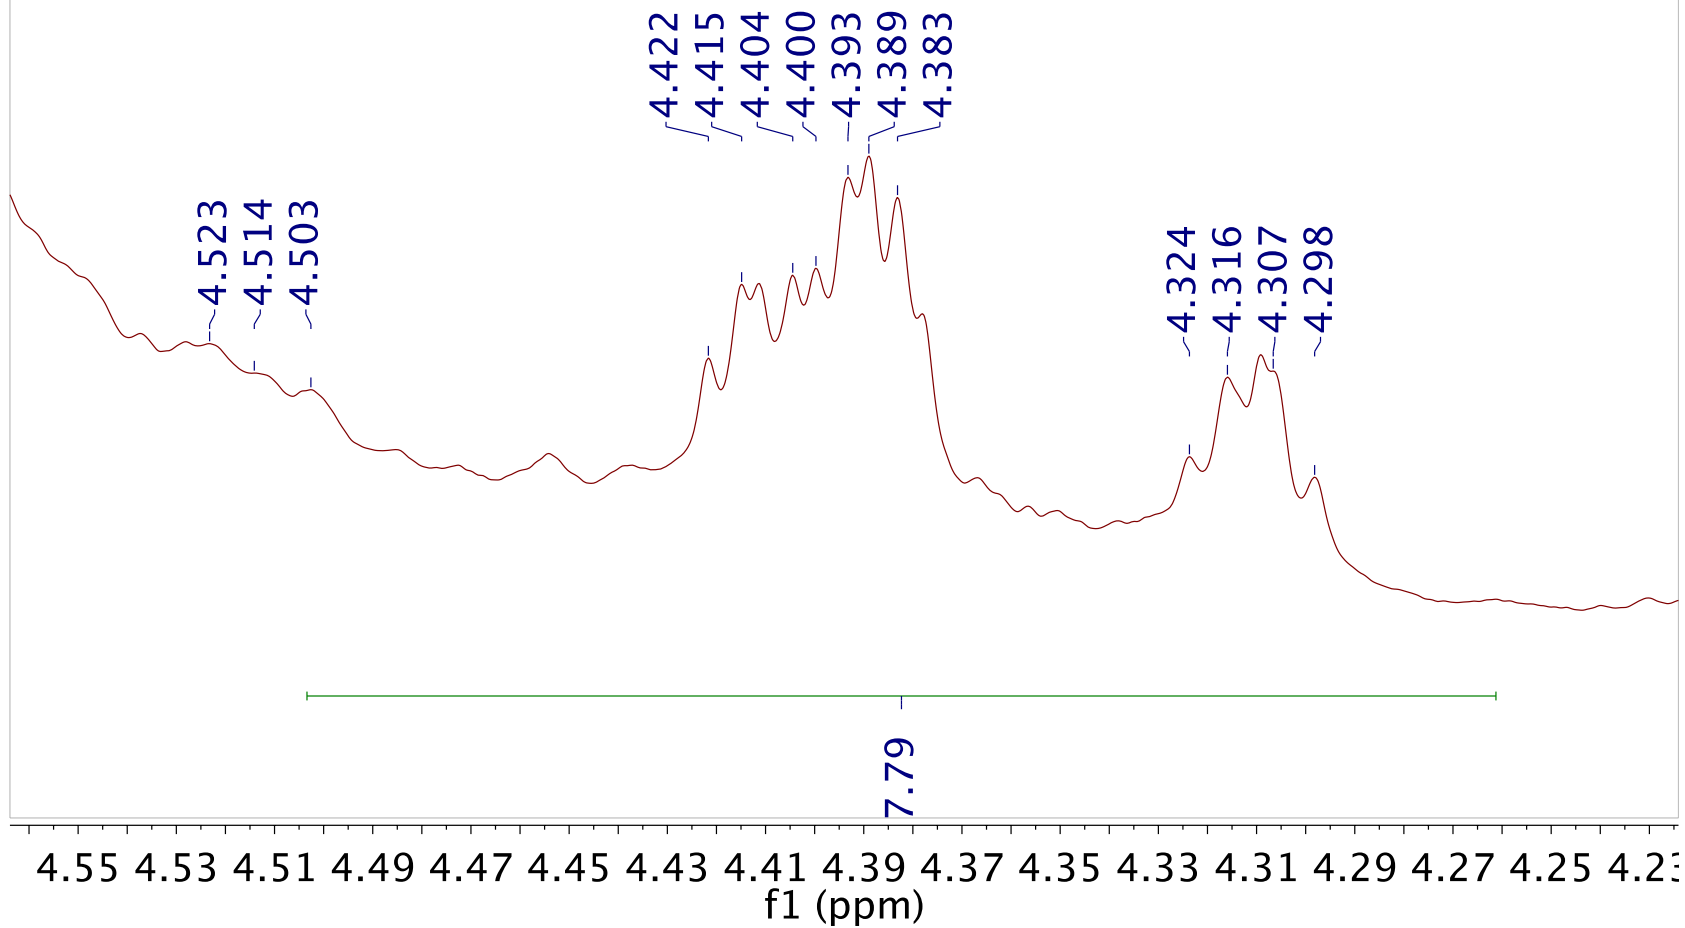

PEPFOLD-3-13CBTNAc-presat-1D

PEPFOLD-3-13CBTNAc-presat-1D

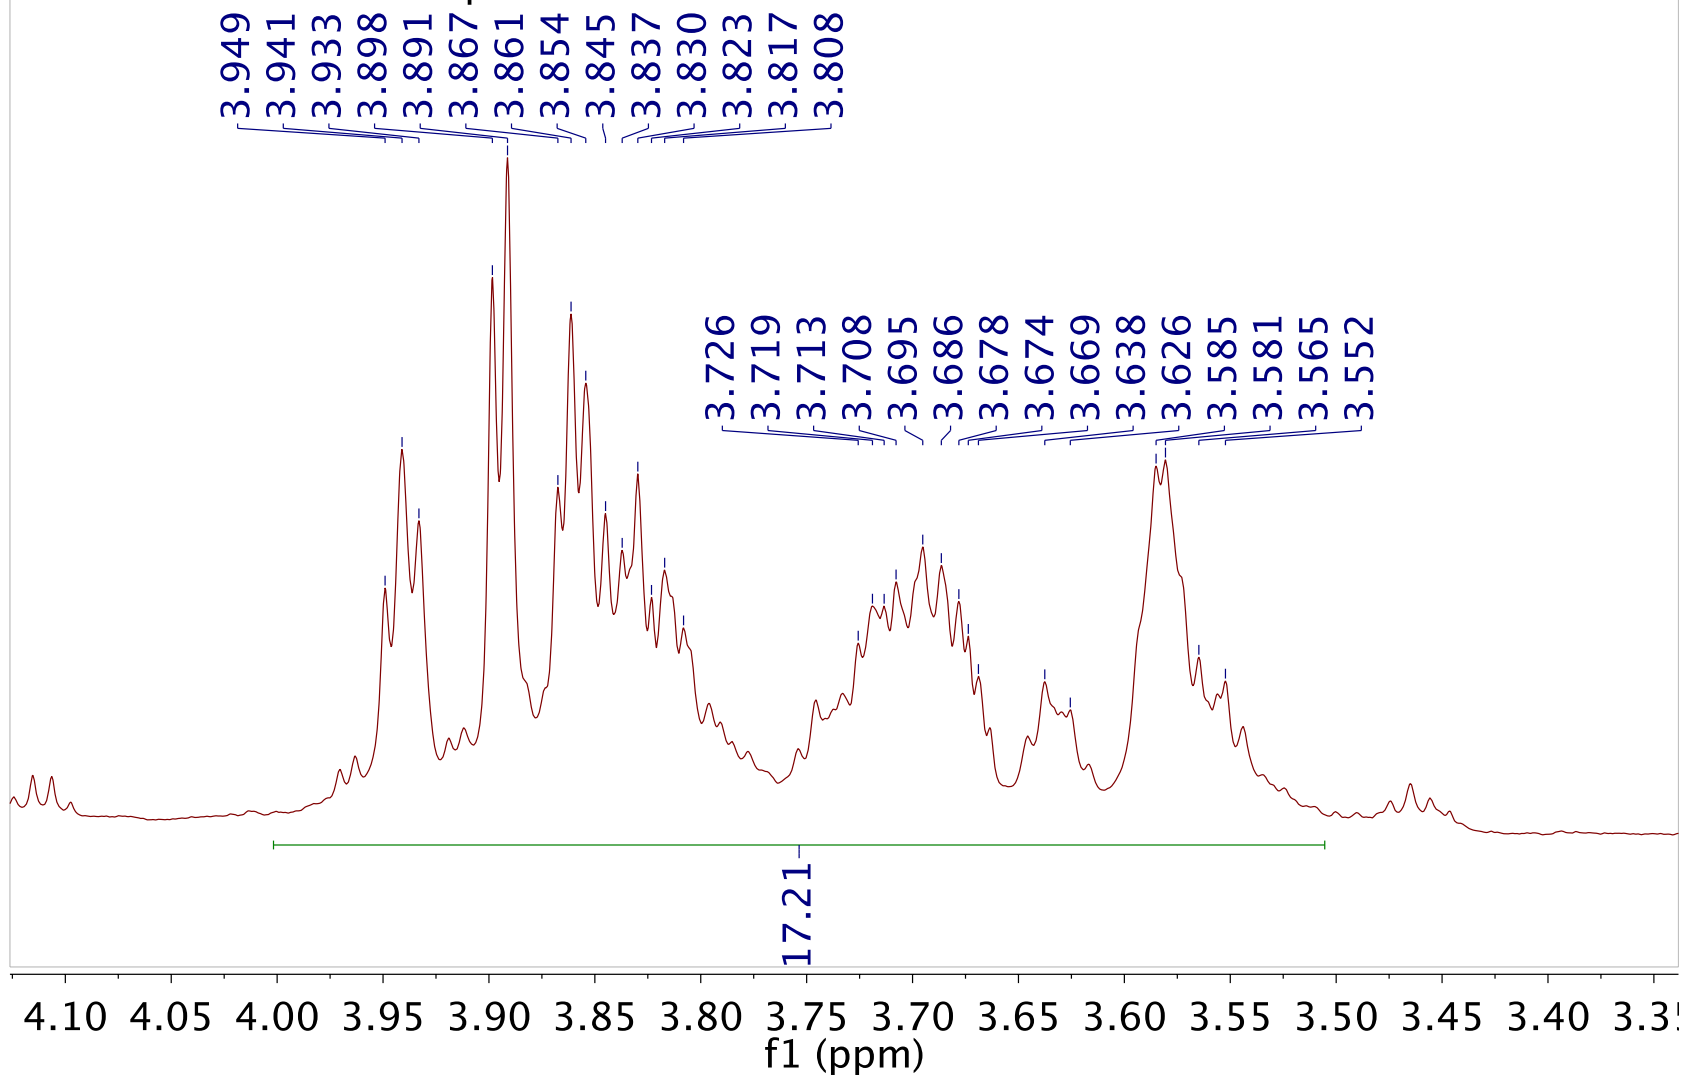

PEPFOLD-3-13CBTNAc-presat-1D  
PEPFOLD-3-13CBTNAc-presat-1D

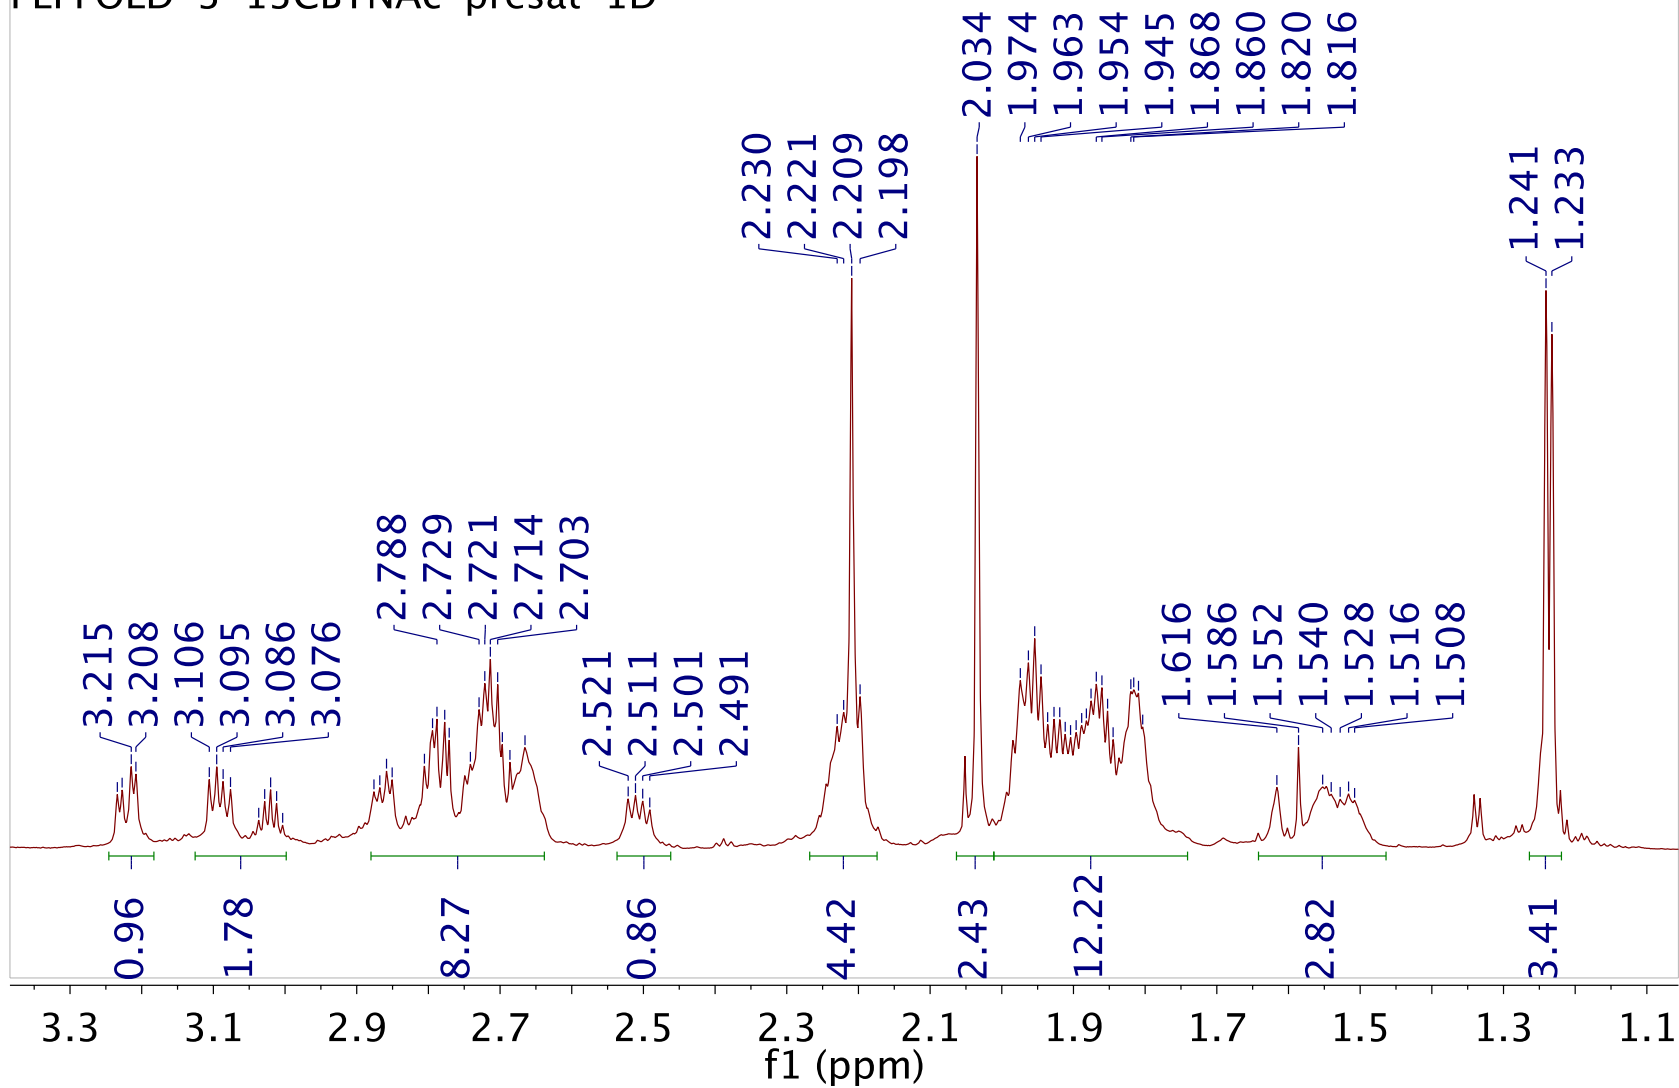

030118\_PEPFOLD-3-13CBTNAc\_pure\_90-10-2uL-H2O-D2O-CD3CN\_12000s\_d1-2\_13C  
C13par

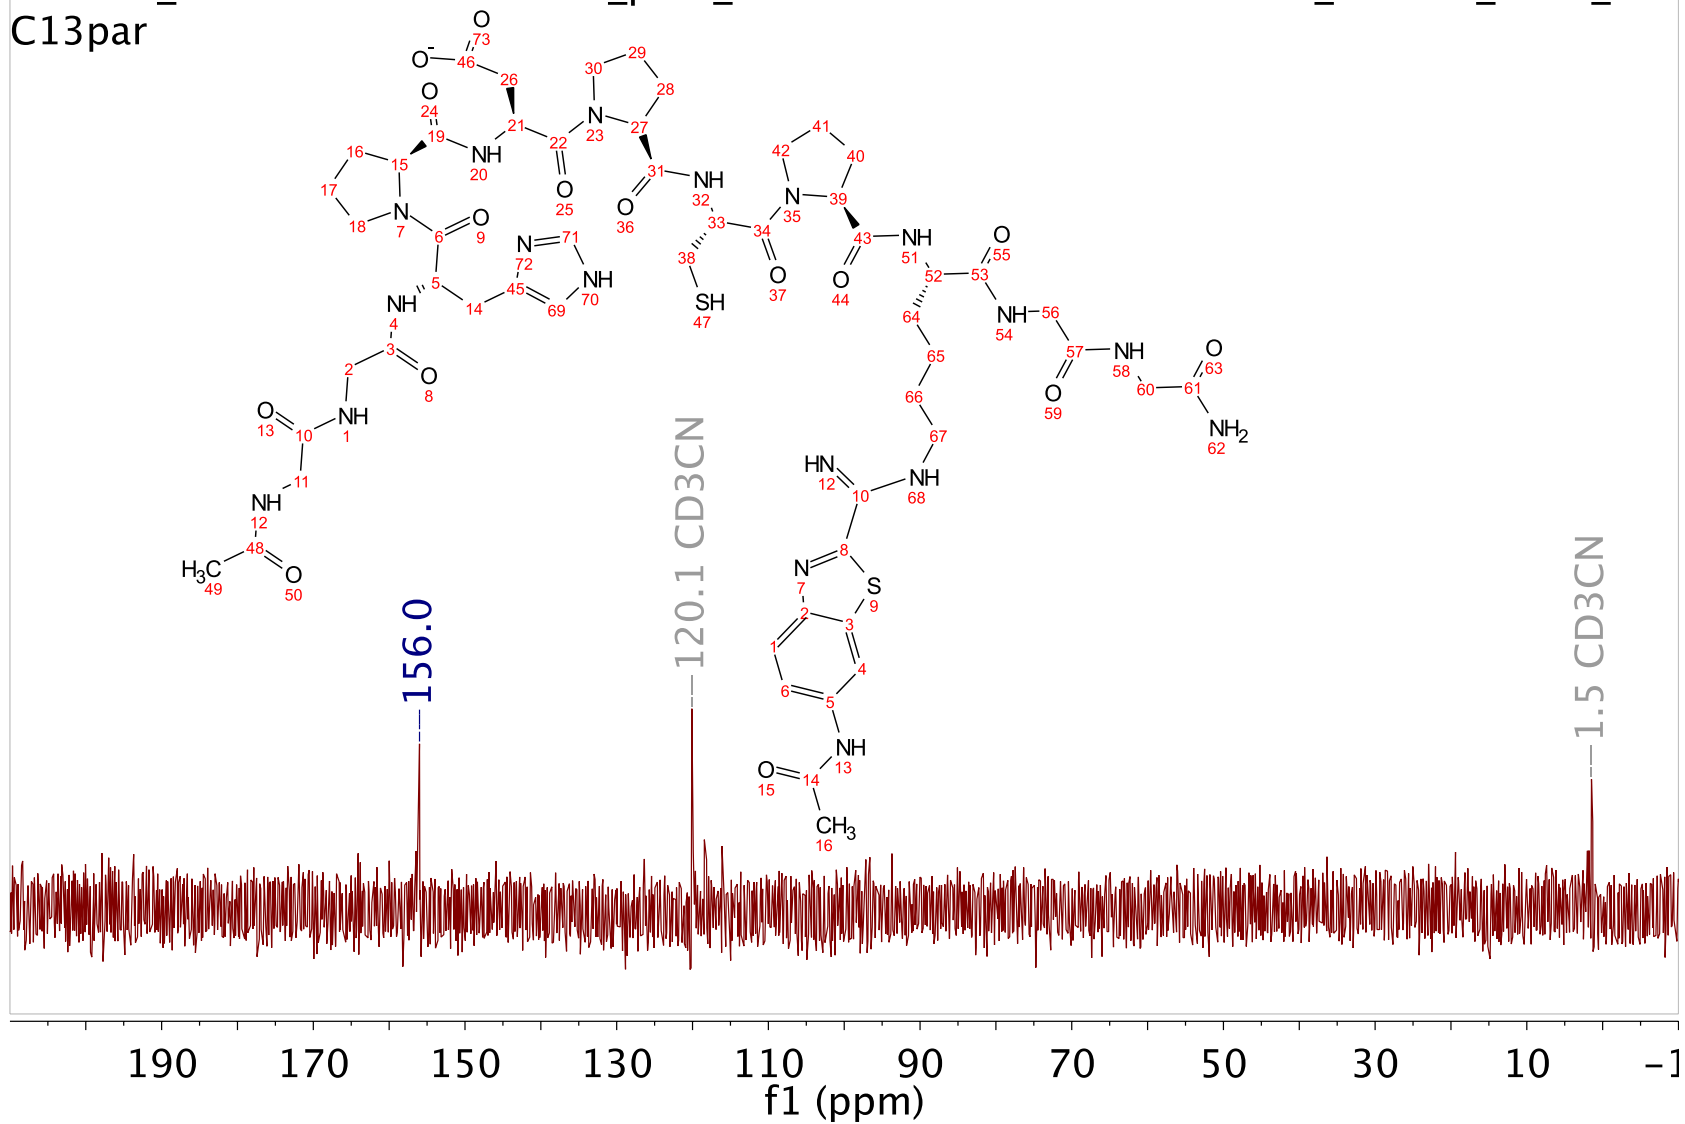

Supplement: NIHMS993346-supplement-supplemental_information.pdf [file NIHMS993346-supplement-supplemental_information.pdf]
